# Supplementary material
Source: PubMed Central journal article supplement (PMC3122946)
Supplement: supp_blood-2010-12-324004_Document1.pdf [file supp_blood-2010-12-324004_Document1.pdf]

**Table S1. Antibodies against the new markers used in this study**

| Marker | Antibody               | Clone      | Conjugate | Source                 | Catalogue # | Positive Control                     | Negative Control* |
|--------|------------------------|------------|-----------|------------------------|-------------|--------------------------------------|-------------------|
| CD44   | CD44                   | 515        | PE        | BD Biosciences         | 550989      | Lymphocytes, monocytes               | Jurkat cell line  |
| BCL2   | Anti-Human Bcl-2       | 100        | PE        | Invitrogen             | MHBCL04     | Lymphocytes, monocytes               | Ramos cell line   |
| HSPB1  | HSP27                  | G3.1       | Biotin    | Lab Vision Corporation | MS-101      | Monocytes                            | Lymphocytes       |
| HSPB1  | HSP27                  | G3.1       | PE        | Stressgen              | SPA-800PE   | Monocytes                            | Lymphocytes       |
| CD73   | CD73                   | AD2        | PE        | BD Biosciences         | 550257      | Lymphocyte subset                    | Monocytes         |
| CD24   | CD24                   | ML5        | PE        | BD Biosciences         | 555428      | B lymphocytes                        | T lymphocytes     |
| CD123  | CD123                  | 9F5        | PE        | BD Biosciences         | 340545      | Monocytes                            | T lymphocytes     |
| CD72   | CD72                   | J4-117     | FITC      | BD Biosciences         | 555918      | B lymphocytes                        | T lymphocytes     |
| CD86   | CD86                   | 2331       | PE        | BD Biosciences         | 555658      | Monocytes                            | Lymphocytes       |
| CD200  | CD200                  | MRC OX-104 | PE        | BD Biosciences         | 552475      | B lymphocytes                        | Monocytes         |
| CD79B  | CD79b                  | AT107-2    | FITC      | Serotec                | MCA2209F    | B lymphocytes                        | T lymphocytes     |
| CD164  | CD164                  | N6B6       | PE        | BD Biosciences         | 551298      | Monocytes                            | Granulocytes      |
| CD304  | CD304                  | AD5-17F6   | PE        | Miltenyi Biotec inc    | 130-090-533 | Dendritic cells (doubled with CD123) | Lymphocytes       |
| CD97   | CD97                   | VIM3b      | PE        | BD Biosciences         | 555774      | Monocytes                            | Lymphocytes       |
| ITGβ7  | Anti-Human Integrin β7 | FIB504     | PE        | BD Biosciences         | 555945      | Lymphocyte subset                    | Lymphocyte subset |
| CD102  | CD102                  | CBR-IC2/2  | PE        | BD Biosciences         | 558080      | Monocytes, lymphocytes               | Granulocytes      |
| CD99   | CD99                   | TU12       | PE        | BD Biosciences         | 555689      | T-ALL                                | Granulocytes      |
| CD300a | Anti-IRp60             | E59.126    | PE        | Beckman Coulter        | A22328      | Monocytes, lymphocyte subset         | Lymphocyte subset |
| CD130  | CD130                  | AM64       | PE        | BD Biosciences         | 555757      | Monocytes, lymphocyte subset         | B lymphocytes     |

|                                           |                                      |         |      |                                   |               |                              |                           |
|-------------------------------------------|--------------------------------------|---------|------|-----------------------------------|---------------|------------------------------|---------------------------|
| PBX1                                      | PBX1                                 | 4A2     | None | Abnova                            | H00005087-M01 | Cell line 697                | Lymphocytes               |
| CTNNA1                                    | Anti-Human $\alpha$ catenin          | 1G5     | None | Abcam                             | Ab17259       | Monocytes                    | Lymphocytes               |
| CD69                                      | CD69                                 | L78     | PE   | BD Biosciences                    | 341652        | Activated lymphocytes        | Non-activated lymphocytes |
| CD49f                                     | CD49f                                | GoH3    | PE   | BD Biosciences                    | 555736        | Monocytes                    | Subset of lymphocytes     |
| EPOR                                      | Anti-Human Epo- R                    | 38409   | PE   | R&D Systems                       | FAB307P       | Subset of erythroblasts      | Lymphocytes               |
| CD1c                                      | CD1c                                 | AD5-8E7 | PE   | Miltenyi Biotec                   | 130-090-508   | B lymphocyte subset          | Granulocytes              |
| BCL11B                                    | Anti-Human BCL11B                    | 25B6    | None | Abcam                             | Ab18465       | Jurkat cell line             | NALM6 cell line           |
| CD120a                                    | CD120a                               | H398    | PE   | Serotec                           | MCA1340PE     | Monocytes                    | Lymphocyte subsets        |
| CD37                                      | CD37                                 | BL14    | PE   | Beckman Coulter                   | IM0458        | B lymphocytes                | T lymphocytes             |
| CD62L                                     | CD62L                                | SK11    | PE   | BD Biosciences                    | 341012        | Monocytes, lymphoid subset   | Lymphoid subset           |
| CD132                                     | CD132                                | AG184   | PE   | BD Biosciences                    | 555900        | Monocytes, lymphocyte subset | Lymphocyte subset         |
| CD83                                      | CD83                                 | HB15a   | PE   | Beckman Coulter                   | IM2218        | Tonsillar lymphocyte subset  | Resting lymphocytes       |
| IL13RA1                                   | Anti-Human IL-13 Receptor $\alpha$ 1 | GM-1C8  | None | Abcam                             | Ab3772        | Monocytes                    | Lymphocytes               |
| Secondary antibodies/reagent              |                                      |         |      |                                   |               |                              |                           |
| Goat F(Ab') <sub>2</sub> Anti-Mouse IgG2a |                                      |         | PE   | Southern Biotechnology Associates | 1082-09       |                              |                           |
| Goat F(Ab') <sub>2</sub> Anti-Mouse IgG1  |                                      |         | FITC | Southern Biotechnology            | 1072-02       |                              |                           |

|                                          |      |                                                |             |  |  |
|------------------------------------------|------|------------------------------------------------|-------------|--|--|
|                                          |      | Associates                                     |             |  |  |
| Goat F(Ab') <sub>2</sub> Anti-Mouse IgG1 | FITC | Southern<br>Biotechnology<br>Associates        | 1072-02     |  |  |
| Goat F(ab') <sub>2</sub> Anti-Rat IgG Fc | PE   | Jackson<br>Immuno-<br>Research<br>Laboratories | 112-116-071 |  |  |
| Streptavidin                             | PE   | Jackson<br>Immuno-<br>Research<br>Laboratories | 016-110-084 |  |  |

\* Dim or no expression

Table S2. Probesets overexpressed in 25% of more of B-lineage ALL cases (n =270) as compared to normal bone marrow CD19<sup>+</sup>CD10<sup>+</sup> cells from 4 healthy donors

| probe set ID | CD10+<br>CD19+<br>max | CD10+<br>CD19+<br>min | ALL max  | ALL min | % ALL<br>over<br>expressed | Title                                                                                | Symbol              |
|--------------|-----------------------|-----------------------|----------|---------|----------------------------|--------------------------------------------------------------------------------------|---------------------|
| 205270_s_at  | 63.1                  | 12.7                  | 2315.9   | 175.2   | 100.0                      | lymphocyte cytosolic protein 2 (SH2 domain containing leukocyte protein of 76kDa)    | LCP2                |
| 213915_at    | 23.3                  | 7.7                   | 3934.2   | 11.6    | 98.1                       | natural killer cell group 7 sequence                                                 | NKG7                |
| 211745_x_at  | 907.2                 | 271.5                 | 267381.8 | 226.1   | 97.4                       | hemoglobin, alpha 1 /// hemoglobin, alpha 1                                          | HBA1                |
| 214414_x_at  | 615.5                 | 165.5                 | 196027.6 | 18.1    | 97.4                       | hemoglobin, alpha 2 /// hemoglobin, alpha 2                                          | HBA2                |
| 209458_x_at  | 1028.1                | 164.7                 | 274466.9 | 252.3   | 97.0                       | hemoglobin, alpha 1 ///hemoglobin, alpha 2                                           | HBA1 /// HBA2       |
| 211699_x_at  | 795.5                 | 176                   | 224904.8 | 286.1   | 97.0                       | hemoglobin, alpha 1 ///hemoglobin, alpha 2                                           | HBA1 /// HBA2       |
| 215411_s_at  | 280                   | 87.6                  | 7183.4   | 88.9    | 97.0                       | TRAF3 interacting protein 2                                                          | TRAF3IP2            |
| 217414_x_at  | 445.7                 | 33.4                  | 158800.9 | 23.6    | 97.0                       | hemoglobin, alpha 2                                                                  | HBA2                |
| 209116_x_at  | 941.1                 | 229.3                 | 313970.9 | 235.5   | 96.7                       | hemoglobin, beta                                                                     | HBB                 |
| 211696_x_at  | 1594.2                | 428.4                 | 334867.9 | 455.7   | 96.7                       | hemoglobin, beta                                                                     | HBB                 |
| 204018_x_at  | 1005.5                | 299.1                 | 283177.3 | 26.8    | 96.7                       | hemoglobin, alpha 1 /// hemoglobin, alpha 2                                          | HBA1 /// HBA2       |
| 212901_s_at  | 47.5                  | 36.6                  | 930.7    | 44.5    | 96.3                       | cleavage stimulation factor, 3' pre-RNA, subunit 2, 64kDa, tau variant               | CSTF2T              |
| 217232_x_at  | 1632.4                | 439.5                 | 318351.3 | 441.5   | 96.3                       | hemoglobin, beta                                                                     | HBB                 |
| 212195_at    | 166                   | 116.4                 | 4130.3   | 211.7   | 95.9                       | MRNA; cDNA DKFZp564F053 (from clone DKFZp564F053)                                    | ---                 |
| 208469_s_at  | 33.4                  | 25.9                  | 517.3    | 14.1    | 94.8                       | palmitoyl-protein thioesterase 2 /// EGF-like-domain, multiple 8                     | PPT2 /// EGFL8      |
| 208820_at    | 18.3                  | 5.4                   | 1678     | 6.5     | 94.8                       | PTK2 protein tyrosine kinase 2                                                       | PTK2                |
| 212812_at    | 247.8                 | 122.3                 | 13345.6  | 70.7    | 94.8                       | CDNA: FLJ22642 fis, clone HSI06970                                                   | ---                 |
| 214617_at    | 130.8                 | 94.1                  | 6399.6   | 159.5   | 94.4                       | perforin 1 (pore forming protein) /// perforin 1 (pore forming protein)              | PRF1                |
| 204848_x_at  | 50.9                  | 16.5                  | 120790.8 | 19.7    | 94.1                       | hemoglobin, gamma A /// hemoglobin, gamma G                                          | HBG1 /// HBG2       |
| 213515_x_at  | 356.4                 | 139.2                 | 88491.2  | 58.9    | 94.1                       | hemoglobin, gamma A /// hemoglobin, gamma G                                          | HBG1 /// HBG2       |
| 219243_at    | 37.3                  | 8.5                   | 3807.4   | 14.9    | 93.0                       | GTPase, IMAP family member 4                                                         | GIMAP4              |
| 206834_at    | 252.4                 | 49.8                  | 105121.3 | 49.3    | 92.2                       | hemoglobin, delta /// hemoglobin, delta                                              | HBD                 |
| 218805_at    | 108.4                 | 57.2                  | 4940.9   | 80.9    | 92.2                       | GTPase, IMAP family member 5 /// GTPase, IMAP family member 5                        | GIMAP5              |
| 215806_x_at  | 114.2                 | 99.1                  | 8980     | 33.2    | 92.2                       | T cell receptor gamma constant 2 /// T cell receptor gamma variable 9 ///            | TRGC2 /// TRGV9 /// |
| 204419_x_at  | 277.7                 | 152.9                 | 124214.1 | 48.5    | 92.2                       | hemoglobin, gamma A /// hemoglobin, gamma G                                          | HBG1 /// HBG2       |
| 209200_at    | 605.5                 | 306.8                 | 8617.6   | 49.7    | 92.2                       | MADS box transcription enhancer factor 2, polypeptide C (myocyte enhancer factor 2C) | MEF2C               |

|             |       |       |         |       |      |                                                                                                             |                         |
|-------------|-------|-------|---------|-------|------|-------------------------------------------------------------------------------------------------------------|-------------------------|
| 200770_s_at | 62.9  | 33.2  | 793     | 25.7  | 91.5 | laminin, gamma 1 (formerly LAMB2)                                                                           | LAMC1                   |
| 204497_at   | 12.9  | 7.2   | 3587.5  | 8.1   | 91.5 | adenylate cyclase 9                                                                                         | ADCY9                   |
| 213095_x_at | 40.2  | 29    | 3845.6  | 28    | 91.5 | allograft inflammatory factor 1                                                                             | AIF1                    |
| 203745_at   | 132.4 | 83.6  | 1181.3  | 77.4  | 90.7 | holocytochrome c synthase (cytochrome c heme-lyase)                                                         | HCCS                    |
| 205950_s_at | 223.3 | 39.9  | 70148.2 | 131   | 90.7 | carbonic anhydrase I                                                                                        | CA1                     |
| 210031_at   | 60.9  | 26.7  | 4613.9  | 22.6  | 90.7 | CD3Z antigen, zeta polypeptide (TiT3 complex)                                                               | CD3Z                    |
| 208923_at   | 349.8 | 238   | 7825.2  | 220.5 | 90.4 | cytoplasmic FMR1 interacting protein 1                                                                      | CYFIP1                  |
| 212136_at   | 369.4 | 317.4 | 3062.7  | 228.2 | 90.4 | ATPase, Ca <sup>++</sup> transporting, plasma membrane 4                                                    | ATP2B4                  |
| 218589_at   | 179.1 | 114.7 | 11915.5 | 71.2  | 90.4 | purinergic receptor P2Y, G-protein coupled, 5                                                               | P2RY5                   |
| 220992_s_at | 63.6  | 42.9  | 664.5   | 16.6  | 90.4 | chromosome 1 open reading frame 25 /// chromosome 1 open reading frame 25                                   | C1orf25                 |
| 205898_at   | 69.3  | 11.1  | 4165.5  | 6.9   | 90.0 | chemokine (C-X3-C motif) receptor 1                                                                         | CX3CR1                  |
| 213539_at   | 160.4 | 53    | 7872.8  | 89.4  | 90.0 | CD3D antigen, delta polypeptide (TiT3 complex)                                                              | CD3D                    |
| 203685_at   | 229   | 149.1 | 5203.8  | 150.1 | 89.6 | B-cell CLL/lymphoma 2                                                                                       | BCL2                    |
| 209813_x_at | 19.8  | 9.6   | 8796.6  | 11.2  | 88.9 | T cell receptor gamma constant 2 /// T cell receptor gamma variable 9 ///                                   | TRGC2 /// TRGV9 ///     |
| 205269_at   | 99.5  | 58.2  | 1135.6  | 60.5  | 88.5 | lymphocyte cytosolic protein 2 (SH2 domain containing leukocyte protein of 76kDa)                           | LCP2                    |
| 212560_at   | 629   | 507.9 | 13410.1 | 337.8 | 88.1 | chromosome 11 open reading frame 32                                                                         | C11orf32                |
| 215051_x_at | 110.9 | 60.4  | 8954.9  | 40.8  | 88.1 | allograft inflammatory factor 1                                                                             | AIF1                    |
| 218244_at   | 284.7 | 193.9 | 2035.2  | 146.7 | 88.1 | nucleolar protein 8                                                                                         | NOL8                    |
| 65585_at    | 62.8  | 19.8  | 610.3   | 26.2  | 87.8 | family with sequence similarity 86, member B1                                                               | FAM86B1                 |
| 205592_at   | 70.1  | 24.9  | 36020.7 | 26.5  | 87.4 | Solute carrier family 4, anion exchanger, member 1 (erythrocyte membrane protein band 3, Diego blood group) | SLC4A1                  |
| 215920_s_at | 46.3  | 21.2  | 631     | 9.7   | 87.4 | hypothetical protein LOC283970 /// similar to nuclear pore complex interacting protein                      | LOC283970 /// LOC440350 |
| 213500_at   | 47.6  | 12.2  | 836.8   | 15.8  | 87.0 | Mitochondrial ribosomal protein S22                                                                         | MRPS22                  |
| 201841_s_at | 302   | 15.6  | 8938.9  | 36.4  | 86.7 | heat shock 27kDa protein 1                                                                                  | HSPB1                   |
| 215967_s_at | 46.2  | 15.6  | 1629.1  | 15.5  | 86.7 | lymphocyte antigen 9                                                                                        | LY9                     |
| 204774_at   | 305.5 | 167.7 | 6766.7  | 297.7 | 86.3 | ecotropic viral integration site 2A                                                                         | EVI2A                   |
| 202771_at   | 211.8 | 40.7  | 4946.6  | 19.9  | 86.3 | family with sequence similarity 38, member A                                                                | FAM38A                  |
| 217865_at   | 188.7 | 14.9  | 3581.1  | 11.3  | 85.9 | ring finger protein 130                                                                                     | RNF130                  |
| 202615_at   | 551.3 | 390.3 | 4195    | 16.1  | 85.9 | Guanine nucleotide binding protein (G protein), q polypeptide                                               | GNAQ                    |
| 219654_at   | 160.3 | 106.9 | 4702.9  | 17.2  | 85.9 | protein tyrosine phosphatase-like (proline instead of catalytic arginine), member a                         | PTPLA                   |
| 1405_i_at   | 22    | 5.7   | 2700.9  | 7.6   | 85.6 | chemokine (C-C motif) ligand 5                                                                              | CCL5                    |
| 200696_s_at | 510.4 | 417   | 11239.7 | 359.9 | 84.8 | gelsolin (amyloidosis, Finnish type)                                                                        | GSN                     |
| 204547_at   | 19.3  | 5.2   | 885.8   | 4.4   | 84.8 | RAB40B, member RAS oncogene family                                                                          | RAB40B                  |

|             |        |       |         |       |      |                                                                                        |          |
|-------------|--------|-------|---------|-------|------|----------------------------------------------------------------------------------------|----------|
| 209901_x_at | 47.7   | 36.8  | 4211    | 22.6  | 84.8 | allograft inflammatory factor 1                                                        | AIF1     |
| 207643_s_at | 234.7  | 94.4  | 3029.5  | 28    | 84.1 | tumor necrosis factor receptor superfamily, member 1A                                  | TNFRSF1A |
| 210933_s_at | 7.4    | 2.6   | 785.5   | 3.3   | 83.7 | fascin homolog 1, actin-bundling protein (Strongylocentrotus purpuratus)               | FSCN1    |
| 211821_x_at | 26.2   | 13.7  | 32574.5 | 6.5   | 83.7 | glycophorin A (includes MN blood group)                                                | GYP A    |
| 32625_at    | 50.2   | 34.8  | 1977.7  | 13.2  | 83.7 | natriuretic peptide receptor A/guanylate cyclase A (atriuretic peptide receptor A)     | NPR1     |
| 203388_at   | 365.8  | 102.9 | 3514.3  | 116.5 | 83.3 | arrestin, beta 2                                                                       | ARRB2    |
| 203372_s_at | 1002.4 | 316.3 | 13986.4 | 31.5  | 83.3 | suppressor of cytokine signaling 2                                                     | SOCS2    |
| 213541_s_at | 631    | 253.7 | 9628.5  | 89.7  | 82.6 | v-ets erythroblastosis virus E26 oncogene like (avian)                                 | ERG      |
| 214181_x_at | 171.8  | 56.6  | 11593.5 | 15.6  | 82.2 | leukocyte specific transcript 1                                                        | LST1     |
| 215633_x_at | 233.3  | 128.3 | 11473.5 | 22.7  | 82.2 | leukocyte specific transcript 1                                                        | LST1     |
| 203373_at   | 1943.6 | 895.5 | 26597.2 | 73.1  | 82.2 | suppressor of cytokine signaling 2                                                     | SOCS2    |
| 202594_at   | 453.3  | 354.8 | 2346.8  | 399.3 | 81.9 | leptin receptor overlapping transcript-like 1                                          | LEPROTL1 |
| 205173_x_at | 604    | 304.7 | 7457.7  | 227.5 | 81.9 | CD58 antigen, (lymphocyte function-associated antigen 3)                               | CD58     |
| 214761_at   | 244.1  | 157.3 | 3051.9  | 6.8   | 81.9 | zinc finger protein 423                                                                | ZNF423   |
| 201280_s_at | 16.7   | 7.8   | 647.9   | 7.8   | 81.5 | disabled homolog 2, mitogen-responsive phosphoprotein (Drosophila)                     | DAB2     |
| 201906_s_at | 37.3   | 16    | 2193.9  | 12.8  | 81.1 | CTD (carboxy-terminal domain, RNA polymerase II, polypeptide A) small phosphatase-like | CTDSPL   |
| 213123_at   | 165.8  | 55.4  | 1188.1  | 20.9  | 81.1 | Microfibrillar-associated protein 3                                                    | MFAP3    |
| 201681_s_at | 25.7   | 7.4   | 685.1   | 3.8   | 80.7 | discs, large homolog 5 (Drosophila)                                                    | DLG5     |
| 203596_s_at | 97.2   | 22.5  | 2083.3  | 34.8  | 80.7 | interferon-induced protein with tetratricopeptide repeats 5                            | IFIT5    |
| 209409_at   | 203.3  | 102.3 | 2142.6  | 97    | 80.7 | growth factor receptor-bound protein 10                                                | GRB10    |
| 209933_s_at | 126.1  | 59.1  | 1481.7  | 29.3  | 80.7 | CD300A antigen                                                                         | CD300A   |
| 218831_s_at | 55.9   | 42.5  | 4423.1  | 18.8  | 80.7 | Fc fragment of IgG, receptor, transporter, alpha                                       | FCGRT    |
| 218689_at   | 42.1   | 20    | 997.9   | 13.5  | 80.4 | Fanconi anemia, complementation group F                                                | FANCF    |
| 202910_s_at | 303.4  | 149.2 | 6537    | 31.5  | 80.4 | CD97 antigen                                                                           | CD97     |
| 216942_s_at | 275.1  | 129.2 | 4763    | 48.2  | 80.4 | CD58 antigen, (lymphocyte function-associated antigen 3)                               | CD58     |
| 210202_s_at | 141.1  | 45.9  | 2799.5  | 18.1  | 80.4 | bridging integrator 1                                                                  | BIN1     |
| 202426_s_at | 12.4   | 10.1  | 1492.4  | 6.3   | 80.0 | retinoid X receptor, alpha                                                             | RXRA     |
| 209568_s_at | 371.5  | 262.5 | 4854.8  | 163.5 | 80.0 | ral guanine nucleotide dissociation stimulator-like 1                                  | RGL1     |
| 212298_at   | 10.6   | 5.6   | 2155.1  | 3.3   | 80.0 | neuropilin 1                                                                           | NRP1     |
| 216050_at   | 9.3    | 4.5   | 2263.8  | 0.9   | 80.0 | CDNA: FLJ20931 fis, clone ADSE01282                                                    | ---      |
| 208010_s_at | 15.4   | 6.4   | 550.2   | 2.9   | 80.0 | protein tyrosine phosphatase, non-receptor type 22 (lymphoid)                          | PTPN22   |
| 215836_s_at | 220.6  | 114.5 | 4999.1  | 75.2  | 79.6 | protocadherin gamma subfamily A1                                                       | PCDHGA1  |

|             |        |        |         |       |      |                                                                                      |          |
|-------------|--------|--------|---------|-------|------|--------------------------------------------------------------------------------------|----------|
| 219777_at   | 45     | 2.4    | 3845.4  | 1.2   | 79.6 | GTPase, IMAP family member 6                                                         | GIMAP6   |
| 221879_at   | 67.6   | 32.7   | 1584.5  | 13.1  | 79.6 | calmodulin-like 4                                                                    | CALML4   |
| 219349_s_at | 123    | 63.1   | 709.7   | 12.8  | 79.6 | SEC5-like 1 (S. cerevisiae)                                                          | SEC5L1   |
| 219938_s_at | 67.1   | 43.3   | 1226.2  | 10.9  | 79.6 | proline-serine-threonine phosphatase interacting protein 2                           | PSTPIP2  |
| 211582_x_at | 295.3  | 27.2   | 9348.4  | 23.1  | 79.3 | leukocyte specific transcript 1                                                      | LST1     |
| 212070_at   | 179.3  | 13.7   | 7815.2  | 33.7  | 79.3 | G protein-coupled receptor 56                                                        | GPR56    |
| 203427_at   | 262.2  | 115.7  | 1968.9  | 47    | 79.3 | ASF1 anti-silencing function 1 homolog A (S. cerevisiae)                             | ASF1A    |
| 201105_at   | 33.8   | 10.7   | 24467.4 | 7.8   | 78.9 | lectin, galactoside-binding, soluble, 1 (galectin 1)                                 | LGALS1   |
| 205099_s_at | 17.7   | 8.1    | 958.1   | 7.1   | 78.9 | chemokine (C-C motif) receptor 1                                                     | CCR1     |
| 202917_s_at | 379.2  | 230.5  | 76685.5 | 107.5 | 78.9 | S100 calcium binding protein A8 (calgranulin A)                                      | S100A8   |
| 200953_s_at | 556.9  | 302.6  | 15144.4 | 183.6 | 78.5 | cyclin D2                                                                            | CCND2    |
| 204563_at   | 415.7  | 288.1  | 16680.8 | 205   | 78.5 | selectin L (lymphocyte adhesion molecule 1)                                          | SELL     |
| 211560_s_at | 32.4   | 17.8   | 59803.8 | 11.7  | 78.1 | aminolevulinate, delta-, synthase 2 (sideroblastic/hypochromic anemia)               | ALAS2    |
| 212267_at   | 177.1  | 117.9  | 2050.8  | 127.1 | 78.1 | KIAA0261                                                                             | KIAA0261 |
| 222116_s_at | 65.2   | 11.5   | 991.4   | 9.7   | 78.1 | TBC1 domain family, member 16                                                        | TBC1D16  |
| 57715_at    | 138.8  | 41.2   | 1448.5  | 48.3  | 78.1 | family with sequence similarity 26, member B                                         | FAM26B   |
| 210916_s_at | 109.2  | 40.8   | 4864.2  | 18.8  | 78.1 | CD44 antigen (homing function and Indian blood group system)                         | CD44     |
| 209199_s_at | 1762.1 | 1338.9 | 12199.4 | 66.6  | 78.1 | MADS box transcription enhancer factor 2, polypeptide C (myocyte enhancer factor 2C) | MEF2C    |
| 203232_s_at | 7.8    | 4.1    | 916.3   | 4     | 77.8 | ataxin 1                                                                             | ATXN1    |
| 222061_at   | 60.7   | 6.9    | 864.5   | 13.9  | 77.8 | CD58 antigen, (lymphocyte function-associated antigen 3)                             | CD58     |
| 209129_at   | 186.6  | 102.1  | 1556.4  | 77.3  | 77.4 | thyroid hormone receptor interactor 6                                                | TRIP6    |
| 211986_at   | 187.8  | 24.6   | 7591.2  | 30.9  | 77.4 | AHNAK nucleoprotein (desmoyokin)                                                     | AHNAK    |
| 212135_s_at | 881.2  | 583.9  | 6848.7  | 471.1 | 77.4 | ATPase, Ca++ transporting, plasma membrane 4                                         | ATP2B4   |
| 212349_at   | 32.2   | 14.1   | 413.8   | 11.1  | 77.4 | protein O-fucosyltransferase 1                                                       | POFUT1   |
| 209163_at   | 64.7   | 37.7   | 1725.6  | 9.9   | 77.4 | cytochrome b-561                                                                     | CYB561   |
| 210164_at   | 56.7   | 5.5    | 1828.8  | 6.5   | 77.0 | granzyme B (granzyme 2, cytotoxic T-lymphocyte-associated serine esterase 1) ///     | GZMB     |
| 212602_at   | 79.7   | 18.9   | 1360.4  | 9.6   | 76.7 | WD repeat and FYVE domain containing 3                                               | WDFY3    |
| 200878_at   | 23.4   | 9.6    | 1992    | 6.1   | 76.3 | endothelial PAS domain protein 1                                                     | EPAS1    |
| 209195_s_at | 228.5  | 65.3   | 2349.2  | 62.6  | 76.3 | adenylate cyclase 6                                                                  | ADCY6    |
| 210629_x_at | 374.2  | 216.5  | 6073.9  | 65.3  | 76.3 | leukocyte specific transcript 1                                                      | LST1     |
| 222101_s_at | 98.5   | 31.8   | 1276    | 15.3  | 76.3 | dachsous 1 (Drosophila)                                                              | DCHS1    |
| 218199_s_at | 72     | 66.6   | 632.1   | 28.1  | 76.3 | nucleolar protein family 6 (RNA-associated)                                          | NOL6     |
| 215543_s_at | 281.3  | 56     | 1778.6  | 25.9  | 75.9 | like-glycosyltransferase                                                             | LARGE    |

|             |        |        |         |       |      |                                                                                                                                                                                       |                   |
|-------------|--------|--------|---------|-------|------|---------------------------------------------------------------------------------------------------------------------------------------------------------------------------------------|-------------------|
| 217730_at   | 151.8  | 114.9  | 1923.4  | 34.6  | 75.9 | transmembrane BAX inhibitor motif containing 1                                                                                                                                        | TMBIM1            |
| 219161_s_at | 370.4  | 214.7  | 4079.9  | 48.4  | 75.9 | chemokine-like factor                                                                                                                                                                 | CKLF              |
| 201666_at   | 287.5  | 234.5  | 6650.2  | 156.8 | 75.6 | TIMP metalloproteinase inhibitor 1                                                                                                                                                    | TIMP1             |
| 203186_s_at | 545.5  | 147.1  | 14516.7 | 171.2 | 75.6 | calvasculin, metastasin, murine placental homolog)                                                                                                                                    | S100A4            |
| 203508_at   | 145.6  | 13.6   | 2176.2  | 28.1  | 75.6 | tumor necrosis factor receptor superfamily, member 1B                                                                                                                                 | TNFRSF1B          |
| 205354_at   | 49.1   | 25     | 799.3   | 13.2  | 75.6 | guanidinoacetate N-methyltransferase                                                                                                                                                  | GAMT              |
| 210784_x_at | 64.6   | 35.1   | 1105.8  | 21.4  | 75.6 | leukocyte immunoglobulin-like receptor, subfamily B (with TM and ITIM domains), member 2 /// leukocyte immunoglobulin-like receptor, subfamily B (with TM and ITIM domains), member 3 | LILRB2 /// LILRB3 |
| 211744_s_at | 428.3  | 296.5  | 5561.2  | 148.4 | 75.6 | CD58 antigen, (lymphocyte function-associated antigen 3) /// CD58 antigen, (lymphocyte function-associated antigen 3)                                                                 | CD58              |
| 219672_at   | 212.5  | 68.3   | 31465.9 | 32.8  | 75.6 | erythroid associated factor                                                                                                                                                           | ERAF              |
| 202535_at   | 134.1  | 94.1   | 756.6   | 21.9  | 75.2 | Fas (TNFRSF6)-associated via death domain                                                                                                                                             | FADD              |
| 205488_at   | 133.2  | 17.6   | 8624.2  | 18.7  | 74.8 | granzyme A (granzyme 1, cytotoxic T-lymphocyte-associated serine esterase 3)                                                                                                          | GZMA              |
| 205708_s_at | 237.2  | 32     | 2798.1  | 131.5 | 74.8 | transient receptor potential cation channel, subfamily M, member 2                                                                                                                    | TRPM2             |
| 214574_x_at | 530.6  | 84     | 10726.8 | 34.4  | 74.8 | leukocyte specific transcript 1                                                                                                                                                       | LST1              |
| 215177_s_at | 145.9  | 31.5   | 12400.9 | 14.6  | 74.8 | integrin, alpha 6                                                                                                                                                                     | ITGA6             |
| 211101_x_at | 604.8  | 512.8  | 5777.6  | 123.3 | 74.8 | leukocyte immunoglobulin-like receptor, subfamily A (with TM domain), member 2                                                                                                        | LILRA2            |
| 208634_s_at | 1744.4 | 1323.4 | 8823.5  | 766   | 74.4 | microtubule-actin crosslinking factor 1                                                                                                                                               | MACF1             |
| 209949_at   | 177.6  | 37     | 3712.2  | 28.7  | 74.4 | neutrophil cytosolic factor 2 (65kDa, chronic granulomatous disease, autosomal 2)                                                                                                     | NCF2              |
| 212678_at   | 181.2  | 55.4   | 902.4   | 70    | 74.4 | Neurofibromin 1 (neurofibromatosis, von Recklinghausen disease, Watson disease)                                                                                                       | NF1               |
| 219837_s_at | 43.5   | 15.8   | 8209.4  | 9.7   | 74.4 | cytokine-like 1                                                                                                                                                                       | CYTL1             |
| 202269_x_at | 70.2   | 15     | 4634.3  | 4.2   | 74.4 | guanylate binding protein 1, interferon-inducible, 67kDa /// guanylate binding protein 1, interferon-inducible, 67kDa                                                                 | GBP1              |
| 202481_at   | 170.6  | 37.7   | 3015.7  | 23.6  | 74.1 | dehydrogenase/reductase (SDR family) member 3                                                                                                                                         | DHRS3             |
| 220206_at   | 62.6   | 20.4   | 507.2   | 7.4   | 74.1 | zinc finger, MYM-type 1                                                                                                                                                               | ZMYM1             |
| 219753_at   | 462.7  | 331.5  | 29780.3 | 31    | 74.1 | stromal antigen 3                                                                                                                                                                     | STAG3             |
| 217728_at   | 358.4  | 166.7  | 11349.1 | 220.3 | 73.7 | S100 calcium binding protein A6 (calcyclin)                                                                                                                                           | S100A6            |
| 222217_s_at | 459.8  | 324.6  | 4162.3  | 181.3 | 73.7 | solute carrier family 27 (fatty acid transporter), member 3                                                                                                                           | SLC27A3           |
| 210146_x_at | 144.2  | 20.9   | 2389.3  | 12.7  | 73.3 | leukocyte immunoglobulin-like receptor, subfamily B (with TM and ITIM domains), member 2                                                                                              | LILRB2            |



|             |       |       |         |       |      |                                                                                                                                                                                       |                   |
|-------------|-------|-------|---------|-------|------|---------------------------------------------------------------------------------------------------------------------------------------------------------------------------------------|-------------------|
| 210225_x_at | 74.9  | 39    | 1132.5  | 21.1  | 73.3 | leukocyte immunoglobulin-like receptor, subfamily B (with TM and ITIM domains), member 2 /// leukocyte immunoglobulin-like receptor, subfamily B (with TM and ITIM domains), member 3 | LILRB2 /// LILRB3 |
| 217188_s_at | 44.3  | 31.3  | 866.3   | 21.9  | 73.3 | chromosome 14 open reading frame 1                                                                                                                                                    | C14orf1           |
| 207338_s_at | 158.2 | 115.3 | 967.9   | 20.4  | 73.3 | zinc finger protein 200                                                                                                                                                               | ZNF200            |
| 201301_s_at | 149.8 | 88.7  | 3595.6  | 11.2  | 73.3 | annexin A4                                                                                                                                                                            | ANXA4             |
| 203591_s_at | 55.4  | 21.3  | 2647.9  | 6.6   | 73.0 | colony stimulating factor 3 receptor (granulocyte) /// colony stimulating factor 3 receptor (granulocyte)                                                                             | CSF3R             |
| 204344_s_at | 60.7  | 28.2  | 753.9   | 24    | 72.6 | Sec23 homolog A (S. cerevisiae)                                                                                                                                                       | SEC23A            |
| 212501_at   | 158.1 | 115.9 | 7067.4  | 15.6  | 72.6 | CCAAT/enhancer binding protein (C/EBP), beta                                                                                                                                          | CEBPB             |
| 204249_s_at | 863.3 | 418.4 | 19159.9 | 415.6 | 71.9 | LIM domain only 2 (rhombotin-like 1)                                                                                                                                                  | LMO2              |
| 219326_s_at | 671.4 | 509.7 | 4219.2  | 395.1 | 71.9 | UDP-GlcNAc:betaGal beta-1,3-N-acetylglucosaminyltransferase 1                                                                                                                         | B3GNT1            |
| 202894_at   | 182   | 58.6  | 1507.8  | 27.6  | 71.9 | EPH receptor B4                                                                                                                                                                       | EPHB4             |
| 218988_at   | 352.1 | 173.3 | 12424.3 | 59.3  | 71.9 | solute carrier family 35, member E3                                                                                                                                                   | SLC35E3           |
| 209583_s_at | 423.9 | 313.2 | 3955.4  | 42.3  | 71.9 | CD200 antigen                                                                                                                                                                         | CD200             |
| 213817_at   | 111.9 | 9.6   | 1451.4  | 2     | 71.9 | MRNA; cDNA DKFZp586B0220 (from clone DKFZp586B0220)                                                                                                                                   | ---               |
| 208047_s_at | 40.8  | 4     | 714.4   | 4.9   | 71.5 | NGFI-A binding protein 1 (EGR1 binding protein 1)                                                                                                                                     | NAB1              |
| 216920_s_at | 169   | 132.3 | 9679.7  | 22.7  | 71.5 | T cell receptor gamma constant 2 /// T cell receptor gamma variable 9                                                                                                                 | TRGC2 /// TRGV9   |
| 204959_at   | 26.5  | 7.5   | 8089.4  | 3.1   | 71.5 | myeloid cell nuclear differentiation antigen /// myeloid cell nuclear differentiation antigen                                                                                         | MNDA              |
| 204438_at   | 114.4 | 83.8  | 12305   | 5.7   | 71.5 | mannose receptor, C type 1 /// mannose receptor, C type 1-like 1                                                                                                                      | MRC1 /// MRC1L1   |
| 203948_s_at | 66.5  | 15.8  | 53188   | 9.1   | 71.1 | myeloperoxidase                                                                                                                                                                       | MPO               |
| 209365_s_at | 416.3 | 51.2  | 10277.5 | 46.2  | 70.7 | extracellular matrix protein 1                                                                                                                                                        | ECM1              |
| 214407_x_at | 207   | 13.6  | 29217.6 | 7.7   | 70.7 | glycophorin B (includes Ss blood group)                                                                                                                                               | GYPB              |
| 221756_at   | 235.7 | 94.4  | 3467.9  | 56.7  | 70.7 | HGFL gene /// HGFL gene                                                                                                                                                               | MGC17330          |
| 216511_s_at | 239.9 | 89    | 2129.1  | 12.7  | 70.7 | transcription factor 7-like 2 (T-cell specific, HMG-box)                                                                                                                              | TCF7L2            |
| 206207_at   | 51.8  | 26.6  | 10212   | 7.2   | 70.7 | Charcot-Leyden crystal protein /// Charcot-Leyden crystal protein                                                                                                                     | CLC               |
| 210547_x_at | 39.2  | 12.8  | 665.6   | 13.8  | 70.4 | islet cell autoantigen 1, 69kDa                                                                                                                                                       | ICA1              |
| 213056_at   | 257.6 | 173.8 | 3516    | 11.2  | 70.4 | FERM domain containing 4B                                                                                                                                                             | FRMD4B            |
| 219530_at   | 137.7 | 45.3  | 759     | 31.1  | 70.0 | hypothetical protein FLJ21816                                                                                                                                                         | FLJ21816          |
| 222079_at   | 159.9 | 99.5  | 1043.2  | 38.1  | 70.0 | ---                                                                                                                                                                                   | ---               |
| 207788_s_at | 93.1  | 58.2  | 2250.2  | 12.5  | 70.0 | sorbin and SH3 domain containing 3                                                                                                                                                    | SORBS3            |
| 212196_at   | 258.2 | 132.8 | 3733.9  | 106   | 69.6 | MRNA; cDNA DKFZp564F053 (from clone DKFZp564F053)                                                                                                                                     | ---               |

|             |       |       |         |       |      |                                                                                    |           |
|-------------|-------|-------|---------|-------|------|------------------------------------------------------------------------------------|-----------|
| 215844_at   | 21.6  | 10.7  | 305.1   | 7     | 69.6 | transportin 2 (importin 3, karyopherin beta 2b)                                    | TNPO2     |
| 215706_x_at | 363.3 | 176.5 | 3611.6  | 78.6  | 69.6 | zyxin                                                                              | ZYX       |
| 201564_s_at | 24.6  | 9.8   | 895.5   | 8.1   | 69.3 | fascin homolog 1, actin-bundling protein (Strongylocentrotus purpuratus)           | FSCN1     |
| 208683_at   | 362.3 | 288.9 | 5110.1  | 178   | 69.3 | calpain 2, (m/II) large subunit                                                    | CAPN2     |
| 221861_at   | 202.8 | 34.1  | 1381.3  | 46    | 69.3 | MRNA; cDNA DKFZp762M127 (from clone DKFZp762M127)                                  | ---       |
| 200951_s_at | 27.7  | 15.2  | 2127.3  | 6     | 69.3 | cyclin D2                                                                          | CCND2     |
| 201328_at   | 751.6 | 331.4 | 7886.4  | 286.8 | 68.9 | v-ets erythroblastosis virus E26 oncogene homolog 2 (avian)                        | ETS2      |
| 209344_at   | 630.8 | 208.5 | 7920.4  | 383.3 | 68.9 | tropomyosin 4                                                                      | TPM4      |
| 222303_at   | 604.5 | 422   | 8580.9  | 42    | 68.9 | ---                                                                                | ---       |
| 211160_x_at | 41.3  | 19.1  | 1744.4  | 10.3  | 68.5 | actinin, alpha 1                                                                   | ACTN1     |
| 204083_s_at | 84.2  | 9.9   | 1854.6  | 7.3   | 68.1 | tropomyosin 2 (beta)                                                               | TPM2      |
| 211100_x_at | 604.9 | 372.9 | 6014.8  | 326.2 | 68.1 | leukocyte immunoglobulin-like receptor, subfamily A (with TM domain), member 2     | LILRA2    |
| 221679_s_at | 24.6  | 5.4   | 479     | 2.9   | 68.1 | abhydrolase domain containing 6                                                    | ABHD6     |
| 218729_at   | 227   | 131.9 | 5414.4  | 61.7  | 68.1 | latexin                                                                            | LXN       |
| 221773_at   | 864.6 | 342.2 | 11369.1 | 83.4  | 68.1 | ELK3, ETS-domain protein (SRF accessory protein 2)                                 | ELK3      |
| 200808_s_at | 336.8 | 99.6  | 3372.4  | 243   | 67.8 | zyxin                                                                              | ZYX       |
| 205837_s_at | 18.2  | 1.6   | 5044    | 1.6   | 67.8 | glycophorin A (includes MN blood group)                                            | GYP A     |
| 222062_at   | 16.1  | 8.9   | 674.4   | 6.8   | 67.8 | interleukin 27 receptor, alpha                                                     | IL27RA    |
| 218820_at   | 151   | 83.1  | 2129.3  | 27.9  | 67.8 | chromosome 14 open reading frame 132                                               | C14orf132 |
| 204648_at   | 71.3  | 15.4  | 1100    | 10    | 67.4 | natriuretic peptide receptor A/guanylate cyclase A (atriuretic peptide receptor A) | NPR1      |
| 205289_at   | 81.6  | 5.2   | 3030    | 5.3   | 67.4 | bone morphogenetic protein 2                                                       | BMP2      |
| 211066_x_at | 362.3 | 258.9 | 7663.5  | 115.2 | 67.4 | protocadherin gamma subfamily A1                                                   | PCDHGA1   |
| 205067_at   | 698.3 | 430.6 | 6951.6  | 85.9  | 67.4 | interleukin 1, beta                                                                | IL1B      |
| 202878_s_at | 348.1 | 242.3 | 3646.4  | 147.1 | 67.0 | complement component 1, q subcomponent, receptor 1                                 | C1QR1     |
| 211581_x_at | 485.2 | 62.8  | 6222.2  | 32.4  | 67.0 | leukocyte specific transcript 1                                                    | LST1      |
| 212772_s_at | 208.1 | 171.5 | 1656.3  | 86.3  | 67.0 | ATP-binding cassette, sub-family A (ABC1), member 2                                | ABCA2     |
| 218522_s_at | 241.8 | 148.4 | 1323.8  | 151.3 | 67.0 | BPY2 interacting protein 1                                                         | BPY2IP1   |
| 221188_s_at | 257.9 | 146.8 | 1620.6  | 76    | 67.0 | cell death-inducing DFFA-like effector b                                           | CIDE B    |
| 216850_at   | 23.1  | 14.9  | 437.5   | 4.5   | 67.0 | small nuclear ribonucleoprotein polypeptide N                                      | SNRPN     |
| 218532_s_at | 220   | 175.4 | 3786.7  | 11.2  | 67.0 | hypothetical protein FLJ20152                                                      | FLJ20152  |
| 203370_s_at | 118.2 | 45.6  | 1223    | 24.7  | 66.7 | PDZ and LIM domain 7 (enigma)                                                      | PDLIM7    |
| 206337_at   | 256   | 77.9  | 7065.2  | 126.8 | 66.7 | chemokine (C-C motif) receptor 7 /// chemokine (C-C motif) receptor 7              | CCR7      |

|             |       |       |         |       |      |                                                                                                       |                       |
|-------------|-------|-------|---------|-------|------|-------------------------------------------------------------------------------------------------------|-----------------------|
| 219411_at   | 35.5  | 17.4  | 554.2   | 11.3  | 66.7 | engulfment and cell motility 3 (ced-12 homolog, C. elegans)                                           | ELMO3                 |
| 203939_at   | 121.1 | 54.3  | 5133.9  | 5     | 66.7 | 5'-nucleotidase, ecto (CD73)                                                                          | NT5E                  |
| 206769_at   | 43.1  | 15.2  | 740.5   | 10.2  | 66.3 | thymosin, beta 4, Y-linked                                                                            | TMSB4Y                |
| 215076_s_at | 18.8  | 10.3  | 618.7   | 7.8   | 66.3 | collagen, type III, alpha 1 (Ehlers-Danlos syndrome type IV, autosomal dominant)                      | COL3A1                |
| 202711_at   | 77.2  | 35.2  | 769.5   | 10.5  | 66.3 | ephrin-B1                                                                                             | EFNB1                 |
| 201976_s_at | 76.5  | 12    | 3468    | 10    | 65.9 | myosin X                                                                                              | MYO10                 |
| 209468_at   | 35.5  | 9     | 518.6   | 9.5   | 65.9 | low density lipoprotein receptor-related protein 5                                                    | LRP5                  |
| 213589_s_at | 13.2  | 8.1   | 555.7   | 8.5   | 65.9 | hypothetical protein LOC146712 /// UDP-GlcNAc:betaGal beta-1,3-N-acetylglucosaminyltransferase-like 1 | LOC146712 /// B3GNTL1 |
| 216352_x_at | 21.4  | 12.4  | 635.4   | 7     | 65.9 | protocadherin gamma subfamily A, 3                                                                    | PCDHGA3               |
| 212364_at   | 56.6  | 15.9  | 1780.2  | 6.8   | 65.9 | myosin IB                                                                                             | MYO1B                 |
| 209101_at   | 428   | 135.6 | 25930.7 | 14.5  | 65.9 | connective tissue growth factor                                                                       | CTGF                  |
| 201295_s_at | 97.5  | 48.6  | 1881.2  | 32.4  | 65.6 | WD repeat and SOCS box-containing 1                                                                   | WSB1                  |
| 203470_s_at | 138.4 | 59.7  | 2050.7  | 27.3  | 65.6 | pleckstrin                                                                                            | PLEK                  |
| 209079_x_at | 370.2 | 206.7 | 7185.2  | 78.4  | 65.6 | protocadherin gamma subfamily A1                                                                      | PCDHGA1               |
| 219539_at   | 116.7 | 24.4  | 771.3   | 10.8  | 65.6 | gem (nuclear organelle) associated protein 6                                                          | GEMIN6                |
| 210299_s_at | 280.5 | 132.8 | 4488.4  | 28    | 65.6 | four and a half LIM domains 1                                                                         | FHL1                  |
| 210298_x_at | 363.7 | 190.1 | 7144.3  | 24.8  | 65.6 | four and a half LIM domains 1                                                                         | FHL1                  |
| 207857_at   | 394.5 | 181.8 | 4403.8  | 146.9 | 65.2 | leukocyte immunoglobulin-like receptor, subfamily A (with TM domain), member 2                        | LILRA2                |
| 209930_s_at | 133.8 | 7.8   | 10314   | 6     | 65.2 | nuclear factor (erythroid-derived 2), 45kDa                                                           | NFE2                  |
| 213694_at   | 301.2 | 211.7 | 3478.4  | 133.6 | 65.2 | round spermatid basic protein 1                                                                       | RSBN1                 |
| 214880_x_at | 22.8  | 6.3   | 610     | 3.6   | 65.2 | caldesmon 1                                                                                           | CALD1                 |
| 211126_s_at | 411.4 | 157.2 | 4771.5  | 35.4  | 65.2 | cysteine and glycine-rich protein 2                                                                   | CSRP2                 |
| 208146_s_at | 25.5  | 18.8  | 1653.4  | 7.6   | 65.2 | carboxypeptidase, vitellogenic-like /// carboxypeptidase, vitellogenic-like                           | CPVL                  |
| 213620_s_at | 983   | 871.1 | 7321.1  | 233.8 | 65.2 | intercellular adhesion molecule 2                                                                     | ICAM2                 |
| 219667_s_at | 709.4 | 360.7 | 6837.7  | 12.4  | 65.2 | B-cell scaffold protein with ankyrin repeats 1                                                        | BANK1                 |
| 203957_at   | 45.1  | 21.8  | 893.1   | 14.2  | 64.8 | E2F transcription factor 6                                                                            | E2F6                  |
| 216035_x_at | 254.4 | 26.8  | 1646.6  | 26.1  | 64.8 | transcription factor 7-like 2 (T-cell specific, HMG-box)                                              | TCF7L2                |
| 207827_x_at | 199.3 | 183   | 30767.9 | 21.7  | 64.8 | synuclein, alpha (non A4 component of amyloid precursor)                                              | SNCA                  |
| 212158_at   | 35.5  | 9.5   | 3320.4  | 4     | 64.8 | syndecan 2 (heparan sulfate proteoglycan 1, cell surface-associated, fibroglycan)                     | SDC2                  |
| 204422_s_at | 9.3   | 6.5   | 388.3   | 2.3   | 64.8 | fibroblast growth factor 2 (basic)                                                                    | FGF2                  |
| 211031_s_at | 554.3 | 418.8 | 4347.1  | 103.8 | 64.8 | cytoplasmic linker 2 /// cytoplasmic linker 2                                                         | CYLN2                 |
| 214022_s_at | 886.2 | 395.4 | 26636.7 | 334.7 | 64.4 | interferon induced transmembrane protein 1 (9-27)                                                     | IFITM1                |

|             |       |       |         |       |      |                                                                                                                                                                                       |                   |
|-------------|-------|-------|---------|-------|------|---------------------------------------------------------------------------------------------------------------------------------------------------------------------------------------|-------------------|
| 204466_s_at | 374.1 | 223   | 72280.7 | 90.1  | 64.4 | synuclein, alpha (non A4 component of amyloid precursor)                                                                                                                              | SNCA              |
| 204683_at   | 740.3 | 498.1 | 4022.8  | 292.4 | 64.1 | intercellular adhesion molecule 2                                                                                                                                                     | ICAM2             |
| 210116_at   | 14.8  | 3.6   | 1595.3  | 4.4   | 64.1 | SH2 domain protein 1A, Duncan's disease (lymphoproliferative syndrome)                                                                                                                | SH2D1A            |
| 202023_at   | 54.6  | 31.9  | 1763.8  | 9.4   | 64.1 | ephrin-A1                                                                                                                                                                             | EFNA1             |
| 204845_s_at | 23.5  | 5.7   | 406.1   | 1.2   | 64.1 | glutamyl aminopeptidase (aminopeptidase A)                                                                                                                                            | ENPEP             |
| 207979_s_at | 120.4 | 38.6  | 2307.3  | 20.4  | 63.7 | CD8 antigen, beta polypeptide 1 (p37)                                                                                                                                                 | CD8B1             |
| 210140_at   | 178.3 | 40.7  | 5369.7  | 30.9  | 63.7 | cystatin F (leukocystatin)                                                                                                                                                            | CST7              |
| 211135_x_at | 81.3  | 25.3  | 984.1   | 27.2  | 63.7 | leukocyte immunoglobulin-like receptor, subfamily B (with TM and ITIM domains), member 2 /// leukocyte immunoglobulin-like receptor, subfamily B (with TM and ITIM domains), member 3 | LILRB2 /// LILRB3 |
| 208871_at   | 55.3  | 20.9  | 836.6   | 9.7   | 63.7 | atrophin 1                                                                                                                                                                            | ATN1              |
| 209683_at   | 217.1 | 49.1  | 2479.7  | 14    | 63.7 | Family with sequence similarity 49, member A                                                                                                                                          | FAM49A            |
| 201944_at   | 759.8 | 517   | 3132.4  | 663.7 | 63.3 | hexosaminidase B (beta polypeptide)                                                                                                                                                   | HEXB              |
| 213103_at   | 56.2  | 12.6  | 763.7   | 10.9  | 63.3 | START domain containing 13                                                                                                                                                            | STARD13           |
| 202893_at   | 134.7 | 39.5  | 1480.8  | 15.9  | 63.3 | unc-13 homolog B (C. elegans)                                                                                                                                                         | UNC13B            |
| 207651_at   | 42.2  | 20.3  | 8734.2  | 8     | 63.3 | G protein-coupled receptor 171                                                                                                                                                        | GPR171            |
| 207075_at   | 23.2  | 10.2  | 638.2   | 8.8   | 63.0 | cold autoinflammatory syndrome 1                                                                                                                                                      | CIAS1             |
| 212728_at   | 85.7  | 26.5  | 958     | 27    | 63.0 | discs, large homolog 3 (neuroendocrine-dlg, Drosophila)                                                                                                                               | DLG3              |
| 212063_at   | 733.2 | 361.3 | 15874.7 | 140.4 | 63.0 | CD44 antigen (homing function and Indian blood group system)                                                                                                                          | CD44              |
| 201508_at   | 139.5 | 45.9  | 2084.8  | 20.8  | 63.0 | insulin-like growth factor binding protein 4                                                                                                                                          | IGFBP4            |
| 218025_s_at | 296.9 | 257.9 | 1696.4  | 72.7  | 63.0 | peroxisomal D3,D2-enoyl-CoA isomerase                                                                                                                                                 | PECI              |
| 202270_at   | 62.8  | 14.1  | 1821.4  | 4.4   | 63.0 | guanylate binding protein 1, interferon-inducible, 67kDa /// guanylate binding protein 1, interferon-inducible, 67kDa                                                                 | GBP1              |
| 214551_s_at | 14.1  | 5.8   | 1524.8  | 3.8   | 62.6 | CD7 antigen (p41)                                                                                                                                                                     | CD7               |
| 220146_at   | 26.7  | 3.5   | 1010.1  | 2.1   | 62.6 | toll-like receptor 7                                                                                                                                                                  | TLR7              |
| 221786_at   | 214.2 | 173.5 | 1433.7  | 16.9  | 62.6 | chromosome 6 open reading frame 120                                                                                                                                                   | C6orf120          |
| 206584_at   | 99.8  | 78.1  | 1102.1  | 13    | 62.6 | lymphocyte antigen 96                                                                                                                                                                 | LY96              |
| 201601_x_at | 604.7 | 162.7 | 22080.6 | 147   | 62.2 | interferon induced transmembrane protein 1 (9-27)                                                                                                                                     | IFITM1            |
| 208130_s_at | 30.5  | 11.4  | 714.8   | 7.5   | 62.2 | thromboxane A synthase 1 (platelet, cytochrome P450, family 5, subfamily A)                                                                                                           | TBXAS1            |
| 210370_s_at | 193.2 | 9     | 1151.2  | 11.5  | 62.2 | lymphocyte antigen 9                                                                                                                                                                  | LY9               |
| 218607_s_at | 446.2 | 365   | 1711.3  | 254.7 | 62.2 | SDA1 domain containing 1                                                                                                                                                              | SDAD1             |
| 218613_at   | 251.9 | 109.2 | 2485    | 44.6  | 62.2 | pleckstrin and Sec7 domain containing 3                                                                                                                                               | PSD3              |
| 212975_at   | 687.4 | 618.3 | 10417.7 | 23    | 62.2 | DENN/MADD domain containing 3                                                                                                                                                         | DENND3            |

|             |       |       |         |       |      |                                                                                          |          |
|-------------|-------|-------|---------|-------|------|------------------------------------------------------------------------------------------|----------|
| 207697_x_at | 402.5 | 221.4 | 4154.4  | 31.9  | 62.2 | leukocyte immunoglobulin-like receptor, subfamily B (with TM and ITIM domains), member 2 | LILRB2   |
| 203192_at   | 85.8  | 61    | 1923.4  | 18    | 61.9 | ATP-binding cassette, sub-family B (MDR/TAP), member 6                                   | ABCB6    |
| 200660_at   | 38.2  | 13.9  | 2700.3  | 7.8   | 61.5 | S100 calcium binding protein A11 (calgizzarin)                                           | S100A11  |
| 202747_s_at | 82.5  | 46.5  | 7009.4  | 39.7  | 61.5 | integral membrane protein 2A                                                             | ITM2A    |
| 203061_s_at | 59.9  | 34    | 667.2   | 17.6  | 61.5 | mediator of DNA damage checkpoint 1                                                      | MDC1     |
| 214450_at   | 30.1  | 16.7  | 2250.8  | 16.9  | 61.5 | cathepsin W (lymphopain) /// cathepsin W (lymphopain)                                    | CTSW     |
| 204304_s_at | 115.5 | 22    | 13206.2 | 6.9   | 61.5 | prominin 1                                                                               | PROM1    |
| 218999_at   | 116.1 | 33.7  | 811.4   | 10.4  | 61.5 | hypothetical protein FLJ11000                                                            | FLJ11000 |
| 220230_s_at | 162.6 | 11.7  | 7143.3  | 4.2   | 61.5 | cytochrome b5 reductase 2                                                                | CYB5R2   |
| 202242_at   | 318.5 | 109   | 4053.5  | 17.3  | 61.5 | tetraspanin 7                                                                            | TSPAN7   |
| 214505_s_at | 632   | 262.1 | 9639.8  | 188.3 | 61.1 | four and a half LIM domains 1                                                            | FHL1     |
| 200771_at   | 309.6 | 153.2 | 1480.6  | 18.1  | 61.1 | laminin, gamma 1 (formerly LAMB2)                                                        | LAMC1    |
| 220640_at   | 29.3  | 13.3  | 665.2   | 5.6   | 61.1 | casein kinase 1, gamma 1                                                                 | CSNK1G1  |
| 201809_s_at | 398.3 | 237.2 | 7012.1  | 84.2  | 61.1 | endoglin (Osler-Rendu-Weber syndrome 1)                                                  | ENG      |
| 206718_at   | 54.8  | 32.7  | 691     | 9.3   | 61.1 | LIM domain only 1 (rhombotin 1)                                                          | LMO1     |
| 39402_at    | 495.8 | 318.6 | 4822.3  | 44.9  | 61.1 | interleukin 1, beta                                                                      | IL1B     |
| 201858_s_at | 619.5 | 277.2 | 69794.9 | 28.2  | 61.1 | proteoglycan 1, secretory granule                                                        | PRG1     |
| 202371_at   | 217.8 | 113.5 | 2896.9  | 9.1   | 61.1 | transcription elongation factor A (SII)-like 4                                           | TCEAL4   |
| 218569_s_at | 54.1  | 43.4  | 610.7   | 21.8  | 60.7 | kelch repeat and BTB (POZ) domain containing 4                                           | KBTBD4   |
| 32502_at    | 128.3 | 52.3  | 758.7   | 38.5  | 60.7 | glycerophosphodiester phosphodiesterase domain containing 5                              | GDPD5    |
| 218764_at   | 696.6 | 275.3 | 8459    | 79    | 60.7 | protein kinase C, eta                                                                    | PRKCH    |
| 219686_at   | 796.9 | 90    | 8383    | 15.6  | 60.7 | serine/threonine kinase 32B                                                              | STK32B   |
| 220770_s_at | 52.6  | 12.1  | 360.7   | 2.5   | 60.4 | transposon-derived Buster3 transposase-like                                              | LOC63920 |
| 202664_at   | 976.9 | 593.1 | 6117.3  | 314.8 | 60.0 | Wiskott-Aldrich syndrome protein interacting protein                                     | WASPIP   |
| 219865_at   | 142.4 | 71.9  | 1295.9  | 40.9  | 60.0 | HSPC157 protein                                                                          | HSPC157  |
| 202430_s_at | 120.4 | 26.3  | 3812.6  | 8.4   | 60.0 | phospholipid scramblase 1                                                                | PLSCR1   |
| 209234_at   | 97.8  | 28.5  | 926.3   | 9.7   | 60.0 | kinesin family member 1B                                                                 | KIF1B    |
| 222201_s_at | 245.9 | 136.7 | 1241.3  | 48.4  | 60.0 | CASP8 associated protein 2                                                               | CASP8AP2 |
| 209360_s_at | 704.4 | 281   | 4550    | 124.2 | 60.0 | runt-related transcription factor 1 (acute myeloid leukemia 1; aml1 oncogene)            | RUNX1    |
| 210895_s_at | 106.9 | 31.9  | 1392.7  | 13.6  | 60.0 | CD86 antigen (CD28 antigen ligand 2, B7-2 antigen)                                       | CD86     |
| 209035_at   | 195.8 | 41.2  | 4059.5  | 10.9  | 60.0 | midkine (neurite growth-promoting factor 2)                                              | MDK      |
| 208370_s_at | 726.8 | 529.7 | 10489.7 | 85.9  | 60.0 | Down syndrome critical region gene 1                                                     | DSCR1    |
| 203535_at   | 311.5 | 255.2 | 52168.5 | 24.2  | 60.0 | S100 calcium binding protein A9 (calgranulin B)                                          | S100A9   |
| 201656_at   | 136.6 | 3.2   | 6443.6  | 1.7   | 59.6 | integrin, alpha 6                                                                        | ITGA6    |
| 221523_s_at | 177.2 | 83.5  | 1807.4  | 64.7  | 59.6 | Ras-related GTP binding D                                                                | RRAGD    |

|             |        |        |         |        |      |                                                                                   |           |
|-------------|--------|--------|---------|--------|------|-----------------------------------------------------------------------------------|-----------|
| 221565_s_at | 167.9  | 33.8   | 1912.9  | 20.9   | 59.6 | family with sequence similarity 26, member B                                      | FAM26B    |
| 206434_at   | 12.7   | 2.4    | 810.5   | 0.7    | 59.6 | sparc/osteonectin, cwcv and kazal-like domains proteoglycan (testican) 3          | SPOCK3    |
| 206506_s_at | 190.3  | 45.2   | 2364.9  | 19     | 59.6 | suppressor of Ty 3 homolog (S. cerevisiae)                                        | SUPT3H    |
| 208891_at   | 997    | 526.4  | 13003.4 | 128.7  | 59.6 | dual specificity phosphatase 6                                                    | DUSP6     |
| 207785_s_at | 445.7  | 232.5  | 5173.6  | 231    | 59.3 | recombining binding protein suppressor of hairless (Drosophila)                   | RBPSUH    |
| 212154_at   | 129.4  | 6.7    | 4850.1  | 6.7    | 59.3 | syndecan 2 (heparan sulfate proteoglycan 1, cell surface-associated, fibroglycan) | SDC2      |
| 221797_at   | 76.7   | 17.6   | 562.9   | 9.9    | 59.3 | hypothetical protein LOC339229                                                    | LOC339229 |
| 202663_at   | 272.6  | 108.1  | 1844.3  | 50.5   | 59.3 | Wiskott-Aldrich syndrome protein interacting protein                              | WASPIP    |
| 206991_s_at | 87.3   | 60.1   | 1388.1  | 29     | 59.3 | chemokine (C-C motif) receptor 5                                                  | CCR5      |
| 207735_at   | 228.9  | 162.1  | 2162.1  | 21.7   | 59.3 | ring finger protein 125                                                           | RNF125    |
| 211144_x_at | 179.3  | 73.4   | 7308.1  | 11.8   | 59.3 | T cell receptor gamma constant 2                                                  | TRGC2     |
| 201315_x_at | 2600.3 | 1198.3 | 27908.8 | 1041.3 | 58.9 | interferon induced transmembrane protein 2 (1-8D)                                 | IFITM2    |
| 202524_s_at | 393.7  | 350.1  | 4971.7  | 235    | 58.9 | sparc/osteonectin, cwcv and kazal-like domains proteoglycan (testican) 2          | SPOCK2    |
| 209728_at   | 22     | 16.3   | 20171.1 | 9.5    | 58.9 | major histocompatibility complex, class II, DR beta 4                             | HLA-DRB4  |
| 209892_at   | 228.2  | 110.3  | 3825.8  | 173.9  | 58.9 | fucosyltransferase 4 (alpha (1,3) fucosyltransferase, myeloid-specific)           | FUT4      |
| 212768_s_at | 8.8    | 2.4    | 6175.5  | 1.6    | 58.9 | olfactomedin 4                                                                    | OLFM4     |
| 214966_at   | 42.2   | 11.3   | 563.1   | 5.9    | 58.9 | glutamate receptor, ionotropic, kainate 5                                         | GRIK5     |
| 217078_s_at | 16     | 4.5    | 519.5   | 2.4    | 58.9 | CD300A antigen                                                                    | CD300A    |
| 206582_s_at | 54.3   | 43.6   | 2710.8  | 14.3   | 58.9 | G protein-coupled receptor 56                                                     | GPR56     |
| 214467_at   | 154.9  | 77.3   | 1080.3  | 55.8   | 58.5 | G protein-coupled receptor 65                                                     | GPR65     |
| 205571_at   | 237.2  | 172.1  | 1201.6  | 71.9   | 58.5 | lipoyltransferase 1                                                               | LIPT1     |
| 220134_x_at | 84.4   | 22.9   | 803.2   | 9      | 58.5 | chromosome 1 open reading frame 78                                                | C1orf78   |
| 203680_at   | 168.3  | 39.3   | 2787.8  | 6.3    | 58.5 | protein kinase, cAMP-dependent, regulatory, type II, beta                         | PRKAR2B   |
| 217800_s_at | 168.2  | 122.5  | 2297.2  | 7.4    | 58.5 | Nedd4 family interacting protein 1                                                | NDFIP1    |
| 203828_s_at | 18.5   | 8.1    | 3620.8  | 8.2    | 58.1 | interleukin 32 /// interleukin 32                                                 | IL32      |
| 217321_x_at | 11.7   | 3.3    | 310.1   | 2.2    | 58.1 | Ataxin 3                                                                          | ATXN3     |
| 219423_x_at | 103.9  | 11.1   | 1087.9  | 14.1   | 58.1 | tumor necrosis factor receptor superfamily, member 25                             | TNFRSF25  |
| 220187_at   | 6.4    | 3      | 200.6   | 1.7    | 58.1 | STEAP family member 4                                                             | STEAP4    |
| 204944_at   | 6.1    | 5.3    | 368.8   | 2.2    | 58.1 | protein tyrosine phosphatase, receptor type, G                                    | PTPRG     |
| 204277_s_at | 19.9   | 11.2   | 342.4   | 11.4   | 57.8 | thymidine kinase 2, mitochondrial                                                 | TK2       |
| 205685_at   | 76.9   | 7.2    | 1077.2  | 5      | 57.8 | CD86 antigen (CD28 antigen ligand 2, B7-2 antigen)                                | CD86      |
| 215933_s_at | 1121.5 | 787.7  | 11058   | 214.8  | 57.8 | hematopoietically expressed homeobox                                              | HHEX      |
| 218751_s_at | 339.1  | 208    | 8267.8  | 45     | 57.8 | F-box and WD-40 domain protein 7 (archipelago homolog, Drosophila)                | FBXW7     |

|             |        |       |         |       |      |                                                                                                                                                                                         |                                                                   |
|-------------|--------|-------|---------|-------|------|-----------------------------------------------------------------------------------------------------------------------------------------------------------------------------------------|-------------------------------------------------------------------|
| 211796_s_at | 382.6  | 210.2 | 13295.6 | 10.4  | 57.8 | T cell receptor beta variable 21-1 /// T cell receptor beta variable 19 /// T cell receptor beta variable 5-4 /// T cell receptor beta variable 3-1 /// T cell receptor beta constant 1 | TRBV21-1 ///<br>TRBV19 ///<br>TRBV5-4 ///<br>TRBV3-1 ///<br>TRBC1 |
| 206666_at   | 123.4  | 33.3  | 5218.3  | 20.4  | 57.4 | granzyme K (granzyme 3; tryptase II) /// granzyme K (granzyme 3; tryptase II)                                                                                                           | GZMK                                                              |
| 212671_s_at | 1304.7 | 118.8 | 18591.5 | 149   | 57.4 | major histocompatibility complex, class II, DQ alpha 1 /// DQ alpha 2                                                                                                                   | HLA-DQA1 ///<br>HLA-DQA2                                          |
| 213262_at   | 154.3  | 93.2  | 1110    | 21.5  | 57.4 | spastic ataxia of Charlevoix-Saguenay (sacsin)                                                                                                                                          | SACS                                                              |
| 218627_at   | 347.9  | 213.1 | 4194.7  | 69.3  | 57.4 | hypothetical protein FLJ11259                                                                                                                                                           | FLJ11259                                                          |
| 203354_s_at | 37.7   | 20.5  | 814.1   | 8.2   | 57.4 | pleckstrin and Sec7 domain containing 3                                                                                                                                                 | PSD3                                                              |
| 217572_at   | 24.3   | 12.9  | 2948    | 4.9   | 57.4 | Transcribed locus, strongly similar to NP_032244.1 hemoglobin alpha 1 chain [Mus musculus]                                                                                              | ---                                                               |
| 213993_at   | 15.3   | 8.7   | 815     | 2.8   | 57.4 | spondin 1, extracellular matrix protein                                                                                                                                                 | SPON1                                                             |
| 212170_at   | 164.8  | 106.1 | 770.6   | 12.4  | 57.4 | RNA binding motif protein 12                                                                                                                                                            | RBM12                                                             |
| 205786_s_at | 168.7  | 50.4  | 5191.4  | 29.6  | 57.0 | integrin, alpha M                                                                                                                                                                       | ITGAM                                                             |
| 221748_s_at | 281.6  | 132.5 | 11141.1 | 85.8  | 57.0 | tensin 1 /// tensin 1                                                                                                                                                                   | TNS1                                                              |
| 222155_s_at | 158.3  | 39.8  | 1291.3  | 23.6  | 57.0 | G protein-coupled receptor 172A                                                                                                                                                         | GPR172A                                                           |
| 200665_s_at | 101.3  | 17.2  | 3081.6  | 6.6   | 57.0 | secreted protein, acidic, cysteine-rich (osteonectin) /// secreted protein, acidic, cysteine-rich (osteonectin)                                                                         | SPARC                                                             |
| 211795_s_at | 118.4  | 40.8  | 2108    | 20.1  | 57.0 | FYN binding protein (FYB-120/130)                                                                                                                                                       | FYB                                                               |
| 201212_at   | 34.6   | 14.8  | 1137    | 4.4   | 57.0 | legumain                                                                                                                                                                                | LGMN                                                              |
| 218695_at   | 49.5   | 32.4  | 816.6   | 13    | 57.0 | exosome component 4                                                                                                                                                                     | EXOSC4                                                            |
| 208886_at   | 582.5  | 77.7  | 15547   | 11.8  | 57.0 | H1 histone family, member 0                                                                                                                                                             | H1F0                                                              |
| 218136_s_at | 409    | 344.1 | 18019.6 | 205.2 | 56.7 | solute carrier family 25, member 37                                                                                                                                                     | SLC25A37                                                          |
| 206734_at   | 113.3  | 42.2  | 701.8   | 13.9  | 56.7 | jerky homolog-like (mouse)                                                                                                                                                              | JRKL                                                              |
| 209651_at   | 114.5  | 58    | 865.7   | 6.7   | 56.7 | transforming growth factor beta 1 induced transcript 1                                                                                                                                  | TGFB1I1                                                           |
| 214690_at   | 13.1   | 8.5   | 360.6   | 2.8   | 56.7 | TATA box binding protein (TBP)-associated factor, RNA polymerase I, B, 63kDa                                                                                                            | TAF1B                                                             |
| 201279_s_at | 106.6  | 14.2  | 1243.9  | 7.6   | 56.3 | disabled homolog 2, mitogen-responsive phosphoprotein (Drosophila)                                                                                                                      | DAB2                                                              |
| 210999_s_at | 224.7  | 70.5  | 3092.9  | 70.1  | 56.3 | growth factor receptor-bound protein 10                                                                                                                                                 | GRB10                                                             |
| 212498_at   | 912.7  | 724.8 | 4480.2  | 570.3 | 56.3 | CDNA FLJ31636 fis, clone NT2RI2003481                                                                                                                                                   | ---                                                               |
| 206229_x_at | 46.9   | 20.7  | 548.4   | 8.7   | 56.3 | paired box gene 2                                                                                                                                                                       | PAX2                                                              |
| 219945_at   | 21.8   | 13.4  | 261.9   | 5.4   | 56.3 | DEAD (Asp-Glu-Ala-Asp) box polypeptide 25                                                                                                                                               | DDX25                                                             |
| 206852_at   | 57.4   | 10    | 1522.9  | 1.8   | 56.3 | EPH receptor A7                                                                                                                                                                         | EPHA7                                                             |
| 209485_s_at | 28.9   | 12.4  | 1427.2  | 3.8   | 56.3 | oxysterol binding protein-like 1A                                                                                                                                                       | OSBPL1A                                                           |
| 204457_s_at | 19     | 7.9   | 3486.7  | 4.9   | 55.9 | growth arrest-specific 1                                                                                                                                                                | GAS1                                                              |

|             |        |        |         |       |      |                                                                                                                                               |                  |
|-------------|--------|--------|---------|-------|------|-----------------------------------------------------------------------------------------------------------------------------------------------|------------------|
| 206498_at   | 62.6   | 26.2   | 1115.7  | 18.8  | 55.9 | oculocutaneous albinism II (pink-eye dilution homolog, mouse)                                                                                 | OCA2             |
| 209691_s_at | 42.9   | 11     | 706.7   | 8     | 55.9 | docking protein 4                                                                                                                             | DOK4             |
| 202446_s_at | 557.8  | 361    | 16437.5 | 52.3  | 55.9 | phospholipid scramblase 1                                                                                                                     | PLSCR1           |
| 206674_at   | 496.6  | 291.7  | 11241.8 | 143.6 | 55.9 | fms-related tyrosine kinase 3                                                                                                                 | FLT3             |
| 217983_s_at | 2911.2 | 1695.5 | 23933.1 | 798.4 | 55.9 | ribonuclease T2                                                                                                                               | RNASET2          |
| 219812_at   | 398.9  | 90.5   | 5223.7  | 44.7  | 55.9 | hypothetical protein MGC2463                                                                                                                  | MGC2463          |
| 205285_s_at | 92.8   | 32.2   | 933.9   | 8.6   | 55.9 | FYN binding protein (FYB-120/130)                                                                                                             | FYB              |
| 202688_at   | 217.4  | 76.5   | 3385.9  | 50.9  | 55.6 | tumor necrosis factor (ligand) superfamily, member 10                                                                                         | TNFSF10          |
| 202710_at   | 258.9  | 138.5  | 1342.8  | 82.5  | 55.6 | BET1 homolog (S. cerevisiae)                                                                                                                  | BET1             |
| 204116_at   | 1213.2 | 604    | 8123.4  | 574.9 | 55.6 | interleukin 2 receptor, gamma (severe combined immunodeficiency)                                                                              | IL2RG            |
| 206332_s_at | 2150.8 | 1433.4 | 10919.1 | 739.6 | 55.6 | interferon, gamma-inducible protein 16                                                                                                        | IFI16            |
| 206752_s_at | 83.6   | 13.6   | 681.7   | 10.6  | 55.6 | DNA fragmentation factor, 40kDa, beta polypeptide (caspase-activated DNase)                                                                   | DFFB             |
| 208657_s_at | 138.4  | 25.5   | 3249.4  | 25.4  | 55.6 | septin 9                                                                                                                                      | SEPT9            |
| 219487_at   | 59.7   | 1.6    | 551.4   | 3.1   | 55.6 | hypothetical protein FLJ23560                                                                                                                 | FLJ23560         |
| 203386_at   | 193.2  | 109    | 1626.1  | 18.5  | 55.6 | TBC1 domain family, member 4                                                                                                                  | TBC1D4           |
| 205640_at   | 56.9   | 35.6   | 1153    | 15.1  | 55.6 | aldehyde dehydrogenase 3 family, member B1                                                                                                    | ALDH3B1          |
| 203069_at   | 66.8   | 19     | 844.4   | 13    | 55.2 | synaptic vesicle glycoprotein 2A                                                                                                              | SV2A             |
| 204302_s_at | 68.2   | 26.7   | 944.7   | 21.1  | 55.2 | KIAA0427                                                                                                                                      | KIAA0427         |
| 205290_s_at | 176.5  | 13.9   | 9212    | 8.5   | 55.2 | bone morphogenetic protein 2                                                                                                                  | BMP2             |
| 205881_at   | 117.4  | 11.6   | 790.2   | 25.2  | 55.2 | zinc finger protein 74 (Cos52)                                                                                                                | ZNF74            |
| 215574_at   | 78.3   | 19.4   | 2858    | 12.2  | 55.2 | CDNA FLJ11454 fis, clone HEMBA1001463                                                                                                         | ---              |
| 215471_s_at | 45.3   | 17     | 1245.8  | 15.9  | 54.8 | microtubule-associated protein 7                                                                                                              | MAP7             |
| 217936_at   | 251.3  | 158.7  | 1327.8  | 122.5 | 54.8 | Rho GTPase activating protein 5                                                                                                               | ARHGAP5          |
| 203264_s_at | 75.9   | 25.6   | 513.6   | 9.9   | 54.8 | Cdc42 guanine nucleotide exchange factor (GEF) 9                                                                                              | ARHGEF9          |
| 221058_s_at | 279.4  | 210.1  | 2060.4  | 24.2  | 54.8 | chemokine-like factor                                                                                                                         | CKLF             |
| 202845_s_at | 663.8  | 459.5  | 2955    | 268.7 | 54.4 | ralA binding protein 1                                                                                                                        | RALBP1           |
| 202931_x_at | 553.1  | 343.6  | 3782.7  | 233.6 | 54.4 | bridging integrator 1                                                                                                                         | BIN1             |
| 209555_s_at | 81.9   | 8.9    | 8745.9  | 6.3   | 54.4 | CD36 antigen (collagen type I receptor, thrombospondin receptor)                                                                              | CD36             |
| 210201_x_at | 795.6  | 608.4  | 5732.9  | 359.2 | 54.4 | bridging integrator 1                                                                                                                         | BIN1             |
| 211627_x_at | 10.8   | 4.1    | 257     | 2.9   | 54.4 | estrogen receptor 1 /// estrogen receptor 1                                                                                                   | ESR1             |
| 213193_x_at | 720.7  | 601.7  | 16080.3 | 353.1 | 54.4 | T cell receptor beta variable 19 /// T cell receptor beta variable 19 /// T cell receptor beta constant 1 /// T cell receptor beta constant 1 | TRBV19 /// TRBC1 |
| 218510_x_at | 249.7  | 41.2   | 4634.1  | 20.6  | 54.4 | hypothetical protein FLJ20152                                                                                                                 | FLJ20152         |
| 218706_s_at | 22.8   | 5.6    | 759.6   | 4     | 54.4 | HCV NS3-transactivated protein 2                                                                                                              | NS3TP2           |



|             |        |       |         |       |      |                                                                                 |              |
|-------------|--------|-------|---------|-------|------|---------------------------------------------------------------------------------|--------------|
| 212905_at   | 250.8  | 141.5 | 1185.6  | 50.5  | 54.4 | cleavage stimulation factor, 3' pre-RNA, subunit 2, 64kDa, tau variant          | CSTF2T       |
| 206234_s_at | 105.2  | 27.5  | 839     | 12.8  | 54.4 | matrix metalloproteinase 17 (membrane-inserted)                                 | MMP17        |
| 203678_at   | 352.4  | 188.6 | 1567.1  | 175.4 | 54.1 | KIAA1018 protein                                                                | KIAA1018     |
| 204720_s_at | 31.5   | 7.3   | 1142.5  | 4.4   | 54.1 | DnaJ (Hsp40) homolog, subfamily C, member 6                                     | DNAJC6       |
| 210061_at   | 74.6   | 27.7  | 511.4   | 14.1  | 54.1 | zinc finger protein 589                                                         | ZNF589       |
| 220974_x_at | 30.1   | 15.8  | 1382.3  | 10.7  | 54.1 | sideroflexin 3 /// sideroflexin 3                                               | SFXN3        |
| 204067_at   | 191.3  | 43.9  | 958.5   | 21.1  | 54.1 | sulfite oxidase                                                                 | SUOX         |
| 200670_at   | 2422.4 | 1523  | 17638.7 | 508.3 | 54.1 | X-box binding protein 1                                                         | XBP1         |
| 212731_at   | 220.1  | 158.7 | 830.8   | 14.9  | 54.1 | ankyrin repeat domain 46                                                        | ANKRD46      |
| 221527_s_at | 136.3  | 40.6  | 694.5   | 10.4  | 54.1 | par-3 partitioning defective 3 homolog (C. elegans)                             | PARD3        |
| 211339_s_at | 193    | 76.6  | 4748.8  | 110.2 | 53.7 | IL2-inducible T-cell kinase                                                     | ITK          |
| 220969_s_at | 122.5  | 79.9  | 614.7   | 58.2  | 53.7 | ---                                                                             | ---          |
| 219130_at   | 264.9  | 180.4 | 1083.9  | 47.7  | 53.7 | hypothetical protein FLJ10287                                                   | FLJ10287     |
| 219335_at   | 165.2  | 77.7  | 1285    | 34.2  | 53.7 | armadillo repeat containing, X-linked 5                                         | ARMCX5       |
| 206275_s_at | 35.9   | 9.6   | 506.5   | 3.2   | 53.7 | microtubule associated monooxygenase, calponin and LIM domain containing 2      | MICAL2       |
| 219871_at   | 36.5   | 11.9  | 819.2   | 4.3   | 53.7 | hypothetical protein FLJ13197                                                   | FLJ13197     |
| 209213_at   | 80     | 41.3  | 944.1   | 8.2   | 53.7 | carbonyl reductase 1                                                            | CBR1         |
| 210746_s_at | 51.5   | 22.9  | 22040.8 | 16.6  | 53.3 | erythrocyte membrane protein band 4.2 /// erythrocyte membrane protein band 4.2 | EPB42        |
| 219528_s_at | 139.2  | 37.1  | 1828.2  | 42.7  | 53.3 | B-cell CLL/lymphoma 11B (zinc finger protein)                                   | BCL11B       |
| 202336_s_at | 22.2   | 10.3  | 4372.9  | 4.8   | 53.3 | peptidylglycine alpha-amidating monooxygenase                                   | PAM          |
| 210215_at   | 54.2   | 13.4  | 2653.7  | 5.7   | 53.3 | transferrin receptor 2                                                          | TFR2         |
| 216321_s_at | 756.7  | 523.2 | 10606.3 | 260.3 | 53.3 | nuclear receptor subfamily 3, group C, member 1 (glucocorticoid receptor)       | NR3C1        |
| 202932_at   | 96.3   | 14    | 1478.6  | 3.4   | 53.3 | v-yes-1 Yamaguchi sarcoma viral oncogene homolog 1                              | YES1         |
| 221920_s_at | 275.2  | 71.1  | 16582.5 | 15.1  | 53.3 | solute carrier family 25, member 37                                             | SLC25A37     |
| 208071_s_at | 465.6  | 298.2 | 3598.8  | 36.7  | 53.3 | leukocyte-associated Ig-like receptor 1                                         | LAIR1        |
| 201061_s_at | 426    | 245.6 | 17977.3 | 186.3 | 53.0 | stomatin                                                                        | STOM         |
| 212408_at   | 828.7  | 649.6 | 4117    | 668.9 | 53.0 | torsin A interacting protein 1                                                  | TOR1AIP1     |
| 221005_s_at | 38.9   | 14.8  | 491.4   | 11.5  | 53.0 | phosphatidylserine synthase 2 /// phosphatidylserine synthase 2                 | PTDSS2       |
| 212956_at   | 276.4  | 23.5  | 5870    | 4.7   | 53.0 | KIAA0882 protein                                                                | KIAA0882     |
| 217948_at   | 27.1   | 19.1  | 371.1   | 5.9   | 53.0 | DKFZP564B147 protein                                                            | DKFZP564B147 |
| 216011_at   | 47.5   | 26.8  | 508     | 7.3   | 53.0 | Solute carrier family 39 (zinc transporter), member 9                           | SLC39A9      |
| 202949_s_at | 33.3   | 13.6  | 1345.9  | 7.5   | 52.6 | four and a half LIM domains 2                                                   | FHL2         |
| 203387_s_at | 266.9  | 209.8 | 1701.4  | 132.2 | 52.6 | TBC1 domain family, member 4                                                    | TBC1D4       |
| 201540_at   | 1847.7 | 885.4 | 22279.2 | 224   | 52.6 | four and a half LIM domains 1                                                   | FHL1         |

|             |        |        |         |       |      |                                                                                          |                       |
|-------------|--------|--------|---------|-------|------|------------------------------------------------------------------------------------------|-----------------------|
| 219315_s_at | 171.4  | 63.4   | 2139.8  | 19.8  | 52.6 | chromosome 16 open reading frame 30                                                      | C16orf30              |
| 205739_x_at | 409.9  | 270.6  | 4446.8  | 95.8  | 52.6 | zinc finger protein 588                                                                  | ZNF588                |
| 211909_x_at | 7.6    | 3.7    | 231     | 1     | 52.6 | prostaglandin E receptor 3 (subtype EP3) ///<br>prostaglandin E receptor 3 (subtype EP3) | PTGER3                |
| 212488_at   | 794.1  | 481.3  | 6100.5  | 39.7  | 52.6 | collagen, type V, alpha 1                                                                | COL5A1                |
| 211368_s_at | 187.8  | 104.4  | 1699.1  | 4.5   | 52.6 | caspase 1, apoptosis-related cysteine peptidase<br>(interleukin 1, beta, convertase)     | CASP1                 |
| 203349_s_at | 218.6  | 56.9   | 3919.9  | 36.4  | 52.2 | ets variant gene 5 (ets-related molecule)                                                | ETV5                  |
| 206099_at   | 521.1  | 140.5  | 6649.5  | 98    | 52.2 | protein kinase C, eta                                                                    | PRKCH                 |
| 209176_at   | 78.5   | 12.3   | 645.9   | 10.5  | 52.2 | ---                                                                                      | ---                   |
| 215111_s_at | 486.3  | 376.5  | 8516    | 194.7 | 52.2 | TSC22 domain family, member 1                                                            | TSC22D1               |
| 218086_at   | 26     | 10.9   | 3310.3  | 8.8   | 52.2 | neural proliferation, differentiation and control, 1                                     | NPDC1                 |
| 217977_at   | 88.7   | 35.5   | 4936.5  | 15.4  | 52.2 | selenoprotein X, 1                                                                       | SEPX1                 |
| 212473_s_at | 118.4  | 85.5   | 10655.4 | 6.7   | 52.2 | microtubule associated monooxygenase, calponin and LIM<br>domain containing 2            | MICAL2                |
| 205717_x_at | 452.2  | 265.9  | 4246.6  | 159.1 | 51.9 | protocadherin gamma subfamily A, 1                                                       | PCDHGA1               |
| 212343_at   | 43.5   | 20.4   | 580.2   | 13.2  | 51.9 | Yip1 domain family, member 6                                                             | YIPF6                 |
| 202342_s_at | 66.7   | 9.5    | 492.8   | 3.4   | 51.9 | tripartite motif-containing 2                                                            | TRIM2                 |
| 216913_s_at | 24.9   | 19.3   | 1027.2  | 9.6   | 51.9 | KIAA0690                                                                                 | KIAA0690              |
| 211546_x_at | 238.6  | 220.9  | 24574.6 | 38.4  | 51.9 | synuclein, alpha (non A4 component of amyloid<br>precursor)                              | SNCA                  |
| 220330_s_at | 76.6   | 55.8   | 1219.5  | 1.9   | 51.9 | SAM domain, SH3 domain and nuclear localisation<br>signals, 1                            | SAMSN1                |
| 201313_at   | 59.3   | 11.7   | 806.8   | 8.4   | 51.5 | enolase 2 (gamma, neuronal)                                                              | ENO2                  |
| 209677_at   | 59.3   | 10     | 494.2   | 6.6   | 51.5 | protein kinase C, iota                                                                   | PRKCI                 |
| 208534_s_at | 60.8   | 12.2   | 1464.6  | 6     | 51.5 | RAS p21 protein activator 4 /// hypothetical protein<br>FLJ21767                         | RASA4 ///<br>FLJ21767 |
| 212504_at   | 241.7  | 71.4   | 2483.2  | 32    | 51.5 | KIAA0934                                                                                 | KIAA0934              |
| 201329_s_at | 863.4  | 379.9  | 7961    | 122.2 | 51.5 | v-ets erythroblastosis virus E26 oncogene homolog 2<br>(avian)                           | ETS2                  |
| 209146_at   | 118.9  | 64.6   | 825.4   | 6.9   | 51.5 | sterol-C4-methyl oxidase-like                                                            | SC4MOL                |
| 221526_x_at | 245.3  | 109.5  | 1393    | 29.7  | 51.5 | par-3 partitioning defective 3 homolog (C. elegans)                                      | PARD3                 |
| 214156_at   | 42.4   | 17.2   | 1686.2  | 3.8   | 51.5 | myosin VIIA and Rab interacting protein                                                  | MYRIP                 |
| 219014_at   | 1928.5 | 1774.4 | 18056.6 | 300   | 51.5 | placenta-specific 8                                                                      | PLAC8                 |
| 200050_at   | 747.8  | 270.7  | 2799    | 232.9 | 51.1 | zinc finger protein 146 /// zinc finger protein 146                                      | ZNF146                |
| 201790_s_at | 103.8  | 21.9   | 1309.1  | 15.1  | 51.1 | 7-dehydrocholesterol reductase                                                           | DHCR7                 |
| 203611_at   | 1976.8 | 1120.4 | 37006.1 | 737.2 | 51.1 | telomeric repeat binding factor 2                                                        | TERF2                 |
| 209835_x_at | 477.3  | 245.5  | 9995.9  | 168.9 | 51.1 | CD44 antigen (homing function and Indian blood group<br>system)                          | CD44                  |

|             |        |        |         |       |      |                                                                                          |          |
|-------------|--------|--------|---------|-------|------|------------------------------------------------------------------------------------------|----------|
| 212183_at   | 100.8  | 17     | 1555.8  | 18.8  | 51.1 | nudix (nucleoside diphosphate linked moiety X)-type motif 4                              | NUDT4    |
| 212598_at   | 41.3   | 12     | 536.8   | 6.1   | 51.1 | WD repeat and FYVE domain containing 3                                                   | WDFY3    |
| 218113_at   | 229    | 70     | 1840    | 54.7  | 51.1 | transmembrane protein 2                                                                  | TMEM2    |
| 218486_at   | 132.3  | 10.8   | 3794.5  | 4.8   | 51.1 | Kruppel-like factor 11                                                                   | KLF11    |
| 54037_at    | 362.4  | 285.4  | 2749.7  | 98.4  | 51.1 | Hermansky-Pudlak syndrome 4                                                              | HPS4     |
| 207813_s_at | 34.9   | 27     | 288.2   | 8     | 51.1 | ferredoxin reductase                                                                     | FDXR     |
| 207120_at   | 22.2   | 11     | 322.9   | 2.7   | 51.1 | zinc finger protein 667                                                                  | ZNF667   |
| 214321_at   | 35.5   | 22.5   | 3390.7  | 3.4   | 51.1 | nephroblastoma overexpressed gene                                                        | NOV      |
| 204546_at   | 60.8   | 16     | 772.7   | 8     | 50.7 | KIAA0513                                                                                 | KIAA0513 |
| 205467_at   | 194.7  | 41.4   | 1696.3  | 27.4  | 50.7 | caspase 10, apoptosis-related cysteine peptidase                                         | CASP10   |
| 210176_at   | 198.1  | 109.2  | 1127.4  | 115.6 | 50.7 | toll-like receptor 1                                                                     | TLR1     |
| 211828_s_at | 25     | 7.9    | 521.9   | 7.4   | 50.7 | TRAF2 and NCK interacting kinase                                                         | TNIK     |
| 200999_s_at | 220.7  | 113.6  | 3758.8  | 26.4  | 50.7 | cytoskeleton-associated protein 4                                                        | CKAP4    |
| 206011_at   | 183.1  | 75.1   | 1908.8  | 12.4  | 50.7 | caspase 1, apoptosis-related cysteine peptidase (interleukin 1, beta, convertase)        | CASP1    |
| 202517_at   | 273.9  | 170.4  | 6850.3  | 28.3  | 50.7 | collapsin response mediator protein 1                                                    | CRMP1    |
| 204747_at   | 282.2  | 196.5  | 5497.8  | 129.3 | 50.4 | interferon-induced protein with tetratricopeptide repeats 3                              | IFIT3    |
| 205838_at   | 28.5   | 9.3    | 8663.8  | 6.7   | 50.4 | glycophorin A (includes MN blood group)                                                  | GYPA     |
| 206098_at   | 35.9   | 3.4    | 206     | 2.4   | 50.4 | zinc finger protein 482                                                                  | ZNF482   |
| 218825_at   | 270.2  | 16.8   | 3402.2  | 15.1  | 50.4 | EGF-like-domain, multiple 7                                                              | EGFL7    |
| 209215_at   | 294    | 224.3  | 2545    | 82    | 50.4 | tetracycline transporter-like protein                                                    | TETRAN   |
| 212077_at   | 70.8   | 60.4   | 5341.6  | 3.6   | 50.4 | caldesmon 1                                                                              | CALD1    |
| 207723_s_at | 14     | 6.5    | 1469.8  | 3.3   | 50.0 | killer cell lectin-like receptor subfamily C, member 3                                   | KLRC3    |
| 219743_at   | 71.1   | 15.2   | 2565.5  | 7.9   | 50.0 | hairly/enhancer-of-split related with YRPW motif 2                                       | HEY2     |
| 201422_at   | 434.5  | 286.1  | 6636.6  | 46.9  | 50.0 | interferon, gamma-inducible protein 30                                                   | IFI30    |
| 201859_at   | 820.4  | 406.8  | 24186.7 | 181.1 | 50.0 | proteoglycan 1, secretory granule                                                        | PRG1     |
| 206232_s_at | 140.2  | 32     | 1423.6  | 8.3   | 50.0 | UDP-Gal:betaGlcNAc beta 1,4- galactosyltransferase, polypeptide 6                        | B4GALT6  |
| 200762_at   | 1427.6 | 1083.2 | 10880.8 | 344.9 | 50.0 | dihydropyrimidinase-like 2                                                               | DPYSL2   |
| 209679_s_at | 361    | 105.6  | 2891.8  | 34.3  | 50.0 | small trans-membrane and glycosylated protein                                            | LOC57228 |
| 203153_at   | 46     | 5.9    | 4357.9  | 7     | 49.6 | interferon-induced protein with tetratricopeptide repeats 1                              | IFIT1    |
| 204310_s_at | 24.1   | 10.3   | 346.6   | 5.8   | 49.6 | natriuretic peptide receptor B/guanylate cyclase B (atrionatriuretic peptide receptor B) | NPR2     |
| 206866_at   | 38.8   | 11.3   | 1138.2  | 6     | 49.6 | cadherin 4, type 1, R-cadherin (retinal)                                                 | CDH4     |

|             |        |        |         |       |      |                                                                                                                                                                                       |                             |
|-------------|--------|--------|---------|-------|------|---------------------------------------------------------------------------------------------------------------------------------------------------------------------------------------|-----------------------------|
| 211133_x_at | 167.6  | 48.7   | 831.3   | 33.3  | 49.6 | leukocyte immunoglobulin-like receptor, subfamily B (with TM and ITIM domains), member 2 /// leukocyte immunoglobulin-like receptor, subfamily B (with TM and ITIM domains), member 3 | LILRB2 /// LILRB3           |
| 212605_s_at | 456.6  | 387.3  | 2803.4  | 247.1 | 49.6 | Nudix (nucleoside diphosphate linked moiety X)-type motif 3                                                                                                                           | NUDT3                       |
| 213273_at   | 114.6  | 12.6   | 2460    | 10.9  | 49.6 | odz, odd Oz/ten-m homolog 4 (Drosophila)                                                                                                                                              | ODZ4                        |
| 218983_at   | 90.8   | 24.9   | 833.9   | 10.5  | 49.6 | complement component 1, r subcomponent-like                                                                                                                                           | C1RL                        |
| 201028_s_at | 2047.8 | 1148.8 | 19384.2 | 325.4 | 49.6 | CD99 antigen                                                                                                                                                                          | CD99                        |
| 211429_s_at | 128.8  | 61.2   | 4692.5  | 21.8  | 49.6 | serpin peptidase inhibitor, clade A (alpha-1 antiproteinase, antitrypsin), member 1                                                                                                   | SERPINA1                    |
| 205041_s_at | 8.5    | 3.2    | 1537.4  | 2.6   | 49.3 | orosomuroid 1 /// orosomuroid 2                                                                                                                                                       | ORM1 /// ORM2               |
| 205418_at   | 133.4  | 15.3   | 890.2   | 11.3  | 49.3 | feline sarcoma oncogene                                                                                                                                                               | FES                         |
| 205495_s_at | 165.1  | 14.8   | 3464.4  | 14.4  | 49.3 | granulysin /// granulysin                                                                                                                                                             | GNLY                        |
| 210314_x_at | 176.8  | 16.3   | 1177.3  | 20.7  | 49.3 | tumor necrosis factor (ligand) superfamily, member 13 /// tumor necrosis factor (ligand) superfamily, member 12-member 13                                                             | TNFSF13 /// TNFSF12-TNFSF13 |
| 209241_x_at | 205.9  | 152.8  | 1195.2  | 26.5  | 49.3 | misshapen-like kinase 1 (zebrafish)                                                                                                                                                   | MINK1                       |
| 202145_at   | 160.4  | 71.4   | 2972.7  | 28.1  | 49.3 | lymphocyte antigen 6 complex, locus E                                                                                                                                                 | LY6E                        |
| 204352_at   | 516.8  | 346.2  | 3368.9  | 89.5  | 49.3 | TNF receptor-associated factor 5                                                                                                                                                      | TRAF5                       |
| 213233_s_at | 508.3  | 399.2  | 2437.2  | 33.5  | 49.3 | kelch-like 9 (Drosophila)                                                                                                                                                             | KLHL9                       |
| 211367_s_at | 177.9  | 76.1   | 1385.3  | 6.2   | 49.3 | caspase 1, apoptosis-related cysteine peptidase (interleukin 1, beta, convertase)                                                                                                     | CASP1                       |
| 218690_at   | 84     | 56.9   | 637.1   | 17.8  | 49.3 | PDZ and LIM domain 4                                                                                                                                                                  | PDLIM4                      |
| 220448_at   | 169.6  | 93.8   | 5928.5  | 4.3   | 49.3 | potassium channel, subfamily K, member 12                                                                                                                                             | KCNK12                      |
| 201012_at   | 202.4  | 40.4   | 15217.5 | 79.3  | 48.9 | annexin A1                                                                                                                                                                            | ANXA1                       |
| 201325_s_at | 41.6   | 9.2    | 2026.9  | 7.8   | 48.9 | epithelial membrane protein 1                                                                                                                                                         | EMP1                        |
| 206871_at   | 33.4   | 11.3   | 43391   | 8.5   | 48.9 | elastase 2, neutrophil                                                                                                                                                                | ELA2                        |
| 204489_s_at | 491.6  | 46.5   | 6193.8  | 22.5  | 48.9 | CD44 antigen (homing function and Indian blood group system)                                                                                                                          | CD44                        |
| 212675_s_at | 649.7  | 387.7  | 3942.6  | 127.4 | 48.9 | ---                                                                                                                                                                                   | ---                         |
| 207733_x_at | 133.5  | 44.8   | 804.2   | 11.6  | 48.9 | pregnancy specific beta-1-glycoprotein 9                                                                                                                                              | PSG9                        |
| 215469_at   | 9.1    | 6      | 491     | 2.4   | 48.9 | CDNA FLJ11627 fis, clone HEMBA1004225                                                                                                                                                 | ---                         |
| 202052_s_at | 113.2  | 17     | 783.9   | 9     | 48.5 | retinoic acid induced 14                                                                                                                                                              | RAI14                       |
| 211571_s_at | 20.8   | 5.6    | 6316.7  | 4.8   | 48.5 | chondroitin sulfate proteoglycan 2 (versican)                                                                                                                                         | CSPG2                       |
| 221942_s_at | 495.9  | 272.4  | 6805.3  | 76.1  | 48.5 | guanylate cyclase 1, soluble, alpha 3                                                                                                                                                 | GUCY1A3                     |
| 208636_at   | 475.1  | 235    | 5700.3  | 22    | 48.5 | Actinin, alpha 1                                                                                                                                                                      | ACTN1                       |
| 212503_s_at | 243.6  | 152.1  | 2682.6  | 52.9  | 48.5 | KIAA0934                                                                                                                                                                              | KIAA0934                    |
| 213746_s_at | 181.5  | 133.1  | 2479.4  | 15.3  | 48.5 | filamin A, alpha (actin binding protein 280)                                                                                                                                          | FLNA                        |
| 210262_at   | 18.9   | 11.2   | 1040.7  | 3.6   | 48.5 | cysteine-rich secretory protein 2                                                                                                                                                     | CRISP2                      |

|             |       |       |         |       |      |                                                                                                                                 |                |
|-------------|-------|-------|---------|-------|------|---------------------------------------------------------------------------------------------------------------------------------|----------------|
| 206082_at   | 517.7 | 281.3 | 3082.3  | 26.6  | 48.5 | ---                                                                                                                             | ---            |
| 203814_s_at | 45.7  | 11.7  | 1307.6  | 6.4   | 48.1 | NAD(P)H dehydrogenase, quinone 2                                                                                                | NQO2           |
| 207426_s_at | 405.2 | 164.3 | 4003.1  | 88.9  | 48.1 | tumor necrosis factor (ligand) superfamily, member 4 (tax-transcriptionally activated glycoprotein 1, 34kDa)                    | TNFSF4         |
| 217382_at   | 27.6  | 2.8   | 671.1   | 1.5   | 48.1 | similar to Chloride intracellular channel protein 1 (Nuclear chloride ion channel 27) (NCC27) (p64 CLCP) (Chloride channel ABP) | LOC390363      |
| 218152_at   | 397.3 | 264.4 | 2145.1  | 196.1 | 48.1 | high-mobility group 20A                                                                                                         | HMG20A         |
| 219570_at   | 98.5  | 13.1  | 722.8   | 12.4  | 48.1 | chromosome 20 open reading frame 23                                                                                             | C20orf23       |
| 214439_x_at | 738.3 | 423.3 | 5005.2  | 34.9  | 48.1 | bridging integrator 1                                                                                                           | BIN1           |
| 219956_at   | 150.6 | 83.3  | 1080.7  | 16.4  | 48.1 | UDP-N-acetyl-alpha-D-galactosamine:polypeptide N-acetylgalactosaminyltransferase 6 (GalNAc-T6)                                  | GALNT6         |
| 212820_at   | 167.8 | 54.4  | 2069.3  | 11.1  | 48.1 | Dmx-like 2                                                                                                                      | DMXL2          |
| 218694_at   | 175.4 | 122.2 | 1524.5  | 24.4  | 48.1 | armadillo repeat containing, X-linked 1                                                                                         | ARMCX1         |
| 205653_at   | 99.7  | 74.7  | 24713.5 | 17    | 48.1 | cathepsin G                                                                                                                     | CTSG           |
| 205804_s_at | 239.2 | 196.7 | 1677.1  | 25.1  | 48.1 | TRAF3 interacting protein 3                                                                                                     | TRAF3IP3       |
| 203167_at   | 27.5  | 21.2  | 755.1   | 11.8  | 47.8 | TIMP metalloproteinase inhibitor 2                                                                                              | TIMP2          |
| 209286_at   | 109.6 | 17.3  | 3085.9  | 13.9  | 47.8 | CDC42 effector protein (Rho GTPase binding) 3                                                                                   | CDC42EP3       |
| 218758_s_at | 122.6 | 44    | 901.4   | 17.9  | 47.8 | DNA segment on chromosome 21 (unique) 2056 expressed sequence                                                                   | D21S2056E      |
| 220618_s_at | 78.8  | 35.1  | 864.5   | 14    | 47.8 | zinc finger, CW type with PWWP domain 1                                                                                         | ZCWPW1         |
| 216056_at   | 37.5  | 20.4  | 1647.5  | 6.6   | 47.8 | CD44 antigen (Indian blood group)                                                                                               | CD44           |
| 204122_at   | 194.7 | 37.7  | 4519.8  | 38.5  | 47.4 | TYRO protein tyrosine kinase binding protein                                                                                    | TYROBP         |
| 211820_x_at | 154   | 9.9   | 16977.4 | 10.9  | 47.4 | glycophorin A (includes MN blood group)                                                                                         | GYP A          |
| 213975_s_at | 385.3 | 20.4  | 11329.4 | 7.7   | 47.4 | lysozyme (renal amyloidosis) /// leukocyte immunoglobulin-like receptor, subfamily B (with TM and ITIM domains), member 1       | LYZ /// LILRB1 |
| 203305_at   | 477   | 331.4 | 17615.2 | 50.6  | 47.4 | coagulation factor XIII, A1 polypeptide                                                                                         | F13A1          |
| 203923_s_at | 307.5 | 200.6 | 2691.8  | 94.1  | 47.4 | cytochrome b-245, beta polypeptide (chronic granulomatous disease)                                                              | CYBB           |
| 207705_s_at | 244.4 | 101.3 | 1962.5  | 21    | 47.4 | KIAA0980 protein                                                                                                                | KIAA0980       |
| 218935_at   | 225.6 | 98.8  | 1666.1  | 18.2  | 47.4 | EH-domain containing 3                                                                                                          | EHD3           |
| 214433_s_at | 176.1 | 92.2  | 37065.6 | 8.9   | 47.4 | selenium binding protein 1 /// selenium binding protein 1                                                                       | SELENBP1       |
| 202382_s_at | 27.2  | 13.3  | 709.5   | 6.9   | 47.0 | glucosamine-6-phosphate deaminase 1                                                                                             | GNPDA1         |
| 210589_s_at | 50.6  | 33.4  | 1138.1  | 22.4  | 47.0 | glucosidase, beta; acid (includes glucosylceramidase) /// glucosidase, beta; acid, pseudogene                                   | GBA /// GBAP   |
| 221709_s_at | 59.4  | 16.6  | 632     | 15.8  | 47.0 | chromosome 14 open reading frame 131 /// chromosome 14 open reading frame 131                                                   | C14orf131      |

|             |        |       |         |       |      |                                                                                                        |          |
|-------------|--------|-------|---------|-------|------|--------------------------------------------------------------------------------------------------------|----------|
| 218276_s_at | 222.1  | 153.4 | 1251.9  | 51.4  | 47.0 | salvador homolog 1 (Drosophila)                                                                        | SAV1     |
| 216155_at   | 107.9  | 19    | 814.4   | 5     | 47.0 | Neuron navigator 1                                                                                     | NAV1     |
| 219691_at   | 139    | 37.5  | 921.3   | 10    | 47.0 | sterile alpha motif domain containing 9                                                                | SAMD9    |
| 215449_at   | 65.7   | 45.5  | 6842.1  | 16    | 47.0 | benzodiazapine receptor (peripheral)-like 1                                                            | BZRPL1   |
| 201372_s_at | 37.6   | 12.1  | 384.9   | 4.6   | 47.0 | cullin 3                                                                                               | CUL3     |
| 207104_x_at | 116.2  | 21.1  | 980.6   | 14.4  | 46.7 | leukocyte immunoglobulin-like receptor, subfamily B (with TM and ITIM domains), member 1               | LILRB1   |
| 209370_s_at | 401.4  | 81.6  | 4041.7  | 110.9 | 46.7 | SH3-domain binding protein 2                                                                           | SH3BP2   |
| 219359_at   | 272.8  | 98    | 4034.5  | 56.4  | 46.7 | hypothetical protein FLJ22635                                                                          | FLJ22635 |
| 37145_at    | 188.7  | 20.9  | 2719.8  | 16.5  | 46.7 | granulysin                                                                                             | GNLY     |
| 213117_at   | 176.9  | 40.6  | 1268    | 13.6  | 46.7 | kelch-like 9 (Drosophila)                                                                              | KLHL9    |
| 210321_at   | 33.3   | 16.6  | 1557.9  | 6.2   | 46.7 | granzyme H (cathepsin G-like 2, protein h-CCPX) ///<br>granzyme H (cathepsin G-like 2, protein h-CCPX) | GZMH     |
| 212509_s_at | 874.8  | 669.9 | 16097.8 | 208.4 | 46.7 | matrix-remodelling associated 7                                                                        | MXRA7    |
| 206518_s_at | 35.2   | 14.3  | 1009.6  | 2.9   | 46.7 | regulator of G-protein signalling 9                                                                    | RGS9     |
| 205899_at   | 81.3   | 41.1  | 5746.4  | 6.7   | 46.7 | cyclin A1                                                                                              | CCNA1    |
| 219952_s_at | 44.5   | 10.4  | 1155.8  | 14.4  | 46.3 | mucolipin 1                                                                                            | MCOLN1   |
| 220734_s_at | 86.1   | 20.6  | 492.2   | 15.8  | 46.3 | hypothetical protein MGC10334                                                                          | MGC10334 |
| 221014_s_at | 150.6  | 5.4   | 789.2   | 61.9  | 46.3 | RAB33B, member RAS oncogene family /// RAB33B,<br>member RAS oncogene family                           | RAB33B   |
| 220615_s_at | 206.2  | 22.1  | 2746.1  | 9.3   | 46.3 | male sterility domain containing 1                                                                     | MLSTD1   |
| 200615_s_at | 283.8  | 215.7 | 2222.3  | 31.7  | 46.3 | adaptor-related protein complex 2, beta 1 subunit                                                      | AP2B1    |
| 218954_s_at | 51.1   | 31.2  | 548.7   | 8     | 46.3 | BRF2, subunit of RNA polymerase III transcription<br>initiation factor, BRF1-like                      | BRF2     |
| 221724_s_at | 32.3   | 26.6  | 1445.2  | 9.7   | 46.3 | C-type lectin domain family 4, member A                                                                | CLEC4A   |
| 212013_at   | 1198.6 | 779.9 | 6768.7  | 10.4  | 46.3 | peroxidasin homolog (Drosophila)                                                                       | PXDN     |
| 201060_x_at | 351.6  | 243.5 | 9900.6  | 143.4 | 45.9 | stomatin                                                                                               | STOM     |
| 204928_s_at | 26.6   | 16.4  | 605.2   | 12.6  | 45.9 | solute carrier family 10 (sodium/bile acid cotransporter<br>family), member 3                          | SLC10A3  |
| 205758_at   | 251.6  | 28.5  | 2296.3  | 26.2  | 45.9 | CD8 antigen, alpha polypeptide (p32) /// CD8 antigen,<br>alpha polypeptide (p32)                       | CD8A     |
| 214692_s_at | 36.8   | 18.8  | 697.7   | 12.1  | 45.9 | jerky homolog (mouse)                                                                                  | JRK      |
| 217904_s_at | 54.5   | 20    | 988.3   | 7.2   | 45.9 | beta-site APP-cleaving enzyme 1                                                                        | BACE1    |
| 205391_x_at | 97.2   | 24.1  | 5144.8  | 10.1  | 45.9 | ankyrin 1, erythrocytic /// ankyrin 1, erythrocytic                                                    | ANK1     |
| 215666_at   | 10.4   | 4     | 4868.5  | 1.7   | 45.9 | major histocompatibility complex, class II, DR beta 4                                                  | HLA-DRB4 |
| 32042_at    | 93.3   | 75.7  | 657     | 18.1  | 45.9 | cytosolic ovarian carcinoma antigen 1                                                                  | COVA1    |
| 221485_at   | 159.7  | 88.1  | 2565.1  | 13.4  | 45.9 | UDP-Gal:betaGlcNAc beta 1,4- galactosyltransferase,<br>polypeptide 5                                   | B4GALT5  |
| 219504_s_at | 74.9   | 32.1  | 647.3   | 5.1   | 45.9 | chromosome 1 open reading frame 82                                                                     | C1orf82  |
| 219154_at   | 139.2  | 34.7  | 1223.9  | 32.3  | 45.6 | ras homolog gene family, member F (in filopodia)                                                       | RHOF     |

|             |       |       |         |       |      |                                                                                 |               |
|-------------|-------|-------|---------|-------|------|---------------------------------------------------------------------------------|---------------|
| 201964_at   | 592.6 | 317.4 | 2559.5  | 146.2 | 45.6 | amyotrophic lateral sclerosis 4                                                 | ALS4          |
| 206414_s_at | 172.8 | 30.4  | 1356.5  | 12.5  | 45.6 | development and differentiation enhancing factor 2                              | DDEF2         |
| 209297_at   | 64.6  | 28.3  | 2212.4  | 12.9  | 45.6 | intersectin 1 (SH3 domain protein)                                              | ITSN1         |
| 221040_at   | 31.9  | 7.5   | 818.7   | 3.6   | 45.6 | calpain 10                                                                      | CAPN10        |
| 211474_s_at | 583.1 | 390.7 | 2625.8  | 126.3 | 45.6 | serpin peptidase inhibitor, clade B (ovalbumin), member 6                       | SERPINB6      |
| 204924_at   | 164.9 | 53.5  | 1519.3  | 16.7  | 45.6 | toll-like receptor 2                                                            | TLR2          |
| 218625_at   | 309.9 | 197.7 | 7686.5  | 59.9  | 45.6 | neuritin 1                                                                      | NRN1          |
| 64408_s_at  | 69.9  | 34.2  | 431.4   | 7.2   | 45.6 | calmodulin-like 4                                                               | CALML4        |
| 204030_s_at | 777.4 | 335.9 | 5350.9  | 17.8  | 45.6 | schwannomin interacting protein 1                                               | SCHIP1        |
| 206048_at   | 26.8  | 6     | 296.3   | 6     | 45.2 | ovo-like 2 (Drosophila)                                                         | OVOL2         |
| 207417_s_at | 179.2 | 129.8 | 960.4   | 71.8  | 45.2 | zinc finger protein 177                                                         | ZNF177        |
| 221682_s_at | 55.4  | 3.5   | 615.7   | 2.5   | 45.2 | protocadherin gamma subfamily B, 6                                              | PCDHGB6       |
| 217143_s_at | 148.2 | 47    | 2102.9  | 22.5  | 45.2 | T cell receptor alpha locus /// T cell receptor delta locus                     | TRA@ /// TRD@ |
| 219200_at   | 193.1 | 136.2 | 791     | 40.9  | 45.2 | hypothetical protein MGC5297                                                    | MGC5297       |
| 203952_at   | 98    | 67.6  | 671.4   | 26.8  | 45.2 | activating transcription factor 6                                               | ATF6          |
| 205878_at   | 39.3  | 19.3  | 420.9   | 6.1   | 45.2 | POU domain, class 6, transcription factor 1                                     | POU6F1        |
| 212062_at   | 18.9  | 10.9  | 2294.2  | 4.1   | 45.2 | ATPase, Class II, type 9A                                                       | ATP9A         |
| 221788_at   | 76.1  | 20.4  | 718.2   | 4.8   | 45.2 | Phosphoglucomutase 3                                                            | PGM3          |
| 207821_s_at | 245.4 | 65    | 1131.2  | 54.3  | 44.8 | PTK2 protein tyrosine kinase 2                                                  | PTK2          |
| 222312_s_at | 50.8  | 9     | 422.6   | 8.3   | 44.8 | CDNA clone IMAGE:6186815                                                        | ---           |
| 207459_x_at | 272.7 | 55.5  | 20138.4 | 19.3  | 44.8 | glycophorin B (includes Ss blood group)                                         | GYPB          |
| 218298_s_at | 440.3 | 284.8 | 2624.6  | 118.3 | 44.8 | chromosome 14 open reading frame 159                                            | C14orf159     |
| 202202_s_at | 47.6  | 9.8   | 586.4   | 2.7   | 44.8 | laminin, alpha 4                                                                | LAMA4         |
| 215354_s_at | 147.9 | 86.6  | 605     | 23.4  | 44.8 | proline-, glutamic acid-, leucine-rich protein 1                                | PELP1         |
| 203355_s_at | 319.3 | 149.7 | 2993.9  | 23.7  | 44.8 | pleckstrin and Sec7 domain containing 3                                         | PSD3          |
| 207030_s_at | 394.1 | 147.2 | 4873.1  | 24.3  | 44.8 | cysteine and glycine-rich protein 2                                             | CSRP2         |
| 215807_s_at | 69    | 40.2  | 1184.6  | 13.1  | 44.8 | plexin B1                                                                       | PLXNB1        |
| 212235_at   | 152.9 | 16.9  | 1270    | 13.7  | 44.4 | plexin D1                                                                       | PLXND1        |
| 218608_at   | 170.7 | 14.9  | 1358.1  | 12.8  | 44.4 | ATPase type 13A2                                                                | ATP13A2       |
| 34726_at    | 210.8 | 91.9  | 901.7   | 87    | 44.4 | calcium channel, voltage-dependent, beta 3 subunit                              | CACNB3        |
| 202201_at   | 261.3 | 56.9  | 23262.7 | 27.3  | 44.4 | biliverdin reductase B (flavin reductase (NADPH))                               | BLVRB         |
| 203148_s_at | 276.3 | 157.7 | 1480.8  | 42.5  | 44.4 | tripartite motif-containing 14                                                  | TRIM14        |
| 215719_x_at | 61.1  | 13.9  | 1175.1  | 5.9   | 44.4 | Fas (TNF receptor superfamily, member 6)                                        | FAS           |
| 222126_at   | 161   | 95    | 1827.7  | 26    | 44.4 | Insulin receptor substrate 3-like                                               | HRBL          |
| 212372_at   | 618.7 | 397.6 | 4614.1  | 115.8 | 44.4 | myosin, heavy polypeptide 10, non-muscle                                        | MYH10         |
| 221994_at   | 36.1  | 13.4  | 347.7   | 3.8   | 44.4 | PDZ and LIM domain 5                                                            | PDLIM5        |
| 215028_at   | 97.8  | 15.6  | 1792.1  | 2.9   | 44.4 | sema domain, transmembrane domain (TM), and cytoplasmic domain, (semaphorin) 6A | SEMA6A        |

|             |       |       |        |       |      |                                                                                       |          |
|-------------|-------|-------|--------|-------|------|---------------------------------------------------------------------------------------|----------|
| 212192_at   | 127.9 | 35.5  | 3244.7 | 2.6   | 44.4 | potassium channel tetramerisation domain containing 12                                | KCTD12   |
| 203325_s_at | 265.4 | 137.3 | 2845.4 | 11.5  | 44.4 | collagen, type V, alpha 1                                                             | COL5A1   |
| 200699_at   | 294.6 | 228   | 1197.6 | 124.3 | 44.1 | KDEL (Lys-Asp-Glu-Leu) endoplasmic reticulum protein retention receptor 2             | KDELR2   |
| 218899_s_at | 164.5 | 10.8  | 3140.6 | 10.1  | 44.1 | brain and acute leukemia, cytoplasmic                                                 | BAALC    |
| 217519_at   | 30.4  | 4.6   | 285    | 2.2   | 44.1 | Microtubule-actin crosslinking factor 1                                               | MACF1    |
| 218807_at   | 562.5 | 419.2 | 4141.9 | 204.2 | 44.1 | vav 3 oncogene                                                                        | VAV3     |
| 210151_s_at | 365.9 | 274.5 | 1788.9 | 42.5  | 44.1 | dual-specificity tyrosine-(Y)-phosphorylation regulated kinase 3                      | DYRK3    |
| 215894_at   | 82.6  | 6.9   | 1987   | 2.1   | 44.1 | prostaglandin D2 receptor (DP)                                                        | PTGDR    |
| 210783_x_at | 163   | 40.1  | 1631.4 | 13    | 44.1 | C-type lectin domain family 11, member A                                              | CLEC11A  |
| 205154_at   | 38    | 17.4  | 1093.7 | 11.5  | 43.7 | leucine rich repeat neuronal 5                                                        | LRRN5    |
| 210430_x_at | 45.3  | 24.4  | 5655.9 | 16.2  | 43.7 | Rhesus blood group, D antigen                                                         | RHD      |
| 211148_s_at | 10.3  | 4.4   | 593    | 4.2   | 43.7 | angiopoietin 2                                                                        | ANGPT2   |
| 222144_at   | 28.4  | 13    | 709.7  | 10.4  | 43.7 | kinesin family member 17                                                              | KIF17    |
| 210613_s_at | 450.3 | 135.3 | 2720.5 | 25.2  | 43.7 | synaptogyrin 1                                                                        | SYNGR1   |
| 204929_s_at | 343.3 | 181   | 2094.2 | 33.4  | 43.7 | vesicle-associated membrane protein 5 (myobrevin)                                     | VAMP5    |
| 201807_at   | 874.5 | 680.8 | 4594.7 | 473.5 | 43.3 | vacuolar protein sorting 26 homolog A (yeast)                                         | VPS26A   |
| 207846_at   | 9.9   | 1.7   | 407.8  | 0.9   | 43.3 | POU domain, class 1, transcription factor 1 (Pit1, growth hormone factor 1)           | POU1F1   |
| 200923_at   | 674.8 | 262.5 | 6976.3 | 63.3  | 43.3 | lectin, galactoside-binding, soluble, 3 binding protein                               | LGALS3BP |
| 211419_s_at | 38.7  | 9.4   | 731    | 4     | 43.3 | chimerin (chimaerin) 2                                                                | CHN2     |
| 209582_s_at | 413.4 | 242.1 | 2897.2 | 106.3 | 43.3 | CD200 antigen                                                                         | CD200    |
| 205131_x_at | 255   | 36.1  | 2512.6 | 11.9  | 43.3 | C-type lectin domain family 11, member A                                              | CLEC11A  |
| 208322_s_at | 188   | 60.7  | 2898.8 | 15.2  | 43.3 | ST3 beta-galactoside alpha-2,3-sialyltransferase 1                                    | ST3GAL1  |
| 208198_x_at | 73.6  | 66.4  | 647.4  | 21.5  | 43.3 | killer cell immunoglobulin-like receptor, two domains, short cytoplasmic tail, 1      | KIR2DS1  |
| 217584_at   | 61.9  | 28.2  | 750.6  | 4.8   | 43.3 | Niemann-Pick disease, type C1                                                         | NPC1     |
| 205330_at   | 200.9 | 114.6 | 3525.1 | 24.7  | 43.3 | meningioma (disrupted in balanced translocation) 1                                    | MN1      |
| 214475_x_at | 190.4 | 85.4  | 4205.9 | 10.1  | 43.3 | calpain 3, (p94)                                                                      | CAPN3    |
| 211709_s_at | 559.3 | 441.1 | 5273.2 | 17.1  | 43.3 | C-type lectin domain family 11, member A /// C-type lectin domain family 11, member A | CLEC11A  |
| 204032_at   | 75.1  | 13.4  | 409.7  | 7.3   | 43.0 | breast cancer anti-estrogen resistance 3                                              | BCAR3    |
| 205109_s_at | 96.9  | 8.6   | 2788.5 | 5.2   | 43.0 | Rho guanine nucleotide exchange factor (GEF) 4                                        | ARHGEF4  |
| 218525_s_at | 191.5 | 59.4  | 973.3  | 40.3  | 43.0 | hypoxia-inducible factor 1, alpha subunit inhibitor                                   | HIF1AN   |
| 221771_s_at | 414.5 | 191.6 | 1621.4 | 150.2 | 43.0 | M-phase phosphoprotein, mpp8                                                          | HSMPP8   |
| 221933_at   | 30.4  | 5.8   | 1889.4 | 3.6   | 43.0 | neuroligin 4, X-linked                                                                | NLGN4X   |
| 202826_at   | 43.2  | 36.7  | 620.2  | 12.9  | 43.0 | serine peptidase inhibitor, Kunitz type 1                                             | SPINT1   |
| 213618_at   | 578.7 | 308   | 2951.3 | 141.6 | 43.0 | centaurin, delta 1                                                                    | CENTD1   |



|             |        |       |         |       |      |                                                                                                |           |
|-------------|--------|-------|---------|-------|------|------------------------------------------------------------------------------------------------|-----------|
| 219376_at   | 112.3  | 45.6  | 439     | 22.2  | 43.0 | zinc finger protein 322B                                                                       | ZNF322B   |
| 220986_s_at | 22.1   | 2.9   | 250.7   | 0.9   | 43.0 | tigger transposable element derived 6 /// tigger transposable element derived 6                | TIGD6     |
| 205349_at   | 542.8  | 279.4 | 9728.6  | 79.3  | 43.0 | guanine nucleotide binding protein (G protein), alpha 15 (Gq class)                            | GNA15     |
| 206001_at   | 1156.7 | 435.3 | 13016   | 73.3  | 43.0 | neuropeptide Y                                                                                 | NPY       |
| 201617_x_at | 30.9   | 6.3   | 1133.6  | 1.6   | 43.0 | caldesmon 1                                                                                    | CALD1     |
| 205407_at   | 153.9  | 62.7  | 1103.5  | 6.8   | 43.0 | reversion-inducing-cysteine-rich protein with kazal motifs                                     | RECK      |
| 214920_at   | 71.5   | 13.9  | 7696.6  | 1     | 43.0 | hypothetical protein LOC221981                                                                 | LOC221981 |
| 203509_at   | 1408.7 | 987.3 | 19247.5 | 644.6 | 42.6 | sortilin-related receptor, L(DLR class) A repeats-containing                                   | SORL1     |
| 203756_at   | 63.4   | 33.9  | 985.4   | 17.2  | 42.6 | Rho guanine nucleotide exchange factor (GEF) 17                                                | ARHGEF17  |
| 215247_at   | 37     | 14.1  | 505.1   | 8.8   | 42.6 | hypothetical protein LOC339692                                                                 | LOC339692 |
| 204490_s_at | 358.2  | 177   | 6178.3  | 80.2  | 42.6 | CD44 antigen (homing function and Indian blood group system)                                   | CD44      |
| 202990_at   | 129.3  | 80.2  | 2758.5  | 19.8  | 42.6 | phosphorylase, glycogen; liver (Hers disease, glycogen storage disease type VI)                | PYGL      |
| 209617_s_at | 68.7   | 23.3  | 424.5   | 6     | 42.6 | catenin (cadherin-associated protein), delta 2 (neural plakophilin-related arm-repeat protein) | CTNND2    |
| 210432_s_at | 126    | 7     | 8051.5  | 3     | 42.6 | sodium channel, voltage-gated, type III, alpha                                                 | SCN3A     |
| 202786_at   | 516.7  | 381.8 | 3315.8  | 115.1 | 42.6 | serine threonine kinase 39 (STE20/SPS1 homolog, yeast)                                         | STK39     |
| 203595_s_at | 211.8  | 106.6 | 2067.3  | 39.1  | 42.6 | interferon-induced protein with tetratricopeptide repeats 5                                    | IFIT5     |
| 201375_s_at | 570.8  | 376.1 | 3830.3  | 343.5 | 42.2 | protein phosphatase 2 (formerly 2A), catalytic subunit, beta isoform                           | PPP2CB    |
| 201640_x_at | 90.8   | 14.3  | 542.2   | 14.8  | 42.2 | cleft lip and palate associated transmembrane protein 1                                        | CLPTM1    |
| 201894_s_at | 782.9  | 494.9 | 3984.2  | 463.8 | 42.2 | signal sequence receptor, alpha (translocon-associated protein alpha)                          | SSR1      |
| 210854_x_at | 157.5  | 33    | 5300.7  | 25.1  | 42.2 | solute carrier family 6 (neurotransmitter transporter, creatine), member 8                     | SLC6A8    |
| 212014_x_at | 406.8  | 193.4 | 8862.5  | 103.3 | 42.2 | CD44 antigen (homing function and Indian blood group system)                                   | CD44      |
| 212366_at   | 238.2  | 143.6 | 1029.8  | 72.6  | 42.2 | zinc finger protein 292                                                                        | ZNF292    |
| 212606_at   | 216.6  | 9.2   | 1437.3  | 6.1   | 42.2 | WD repeat and FYVE domain containing 3                                                         | WDFY3     |
| 218676_s_at | 240.6  | 17.7  | 3374.1  | 9.2   | 42.2 | phosphatidylcholine transfer protein                                                           | PCTP      |
| 219485_s_at | 568.5  | 437.9 | 3387.7  | 256.5 | 42.2 | proteasome (prosome, macropain) 26S subunit, non-ATPase, 10                                    | PSMD10    |

|             |        |       |         |       |      |                                                                                                                                               |         |
|-------------|--------|-------|---------|-------|------|-----------------------------------------------------------------------------------------------------------------------------------------------|---------|
| 219491_at   | 33.9   | 14    | 393.9   | 10.4  | 42.2 | leucine rich repeat and fibronectin type III domain containing 4                                                                              | LRFN4   |
| 219521_at   | 24.7   | 17.2  | 731.3   | 12.4  | 42.2 | beta-1,3-glucuronyltransferase 1 (glucuronosyltransferase P)                                                                                  | B3GAT1  |
| 49111_at    | 242.1  | 150.9 | 1265    | 107.9 | 42.2 | MRNA; cDNA DKFZp762M127 (from clone DKFZp762M127)                                                                                             | ---     |
| 206676_at   | 25.6   | 8.4   | 11672.8 | 2.9   | 42.2 | carcinoembryonic antigen-related cell adhesion molecule 8                                                                                     | CEACAM8 |
| 209970_x_at | 558.3  | 425.2 | 3740.3  | 162.5 | 42.2 | caspase 1, apoptosis-related cysteine peptidase (interleukin 1, beta, convertase)                                                             | CASP1   |
| 216392_s_at | 288.4  | 175.1 | 1390.9  | 40.1  | 42.2 | SEC23 interacting protein                                                                                                                     | SEC23IP |
| 201539_s_at | 357.3  | 328.8 | 6236.3  | 98.9  | 42.2 | four and a half LIM domains 1                                                                                                                 | FHL1    |
| 204066_s_at | 99.5   | 53.6  | 13416.6 | 8.8   | 42.2 | centaurin, gamma 2                                                                                                                            | CENTG2  |
| 202392_s_at | 197.9  | 91.7  | 971.1   | 29.9  | 42.2 | phosphatidylserine decarboxylase                                                                                                              | PISD    |
| 204914_s_at | 68     | 22.8  | 6617.3  | 4.2   | 42.2 | SRY (sex determining region Y)-box 11                                                                                                         | SOX11   |
| 213050_at   | 85.5   | 61.6  | 2104.7  | 18.4  | 42.2 | cordon-bleu homolog (mouse)                                                                                                                   | COBL    |
| 202797_at   | 512.7  | 296.4 | 2519.2  | 230.9 | 41.9 | SAC1 suppressor of actin mutations 1-like (yeast)                                                                                             | SACM1L  |
| 205844_at   | 44.7   | 3.2   | 2772.1  | 2.6   | 41.9 | vanin 1 /// vanin 1                                                                                                                           | VNN1    |
| 221023_s_at | 46.3   | 6     | 655.1   | 4.1   | 41.9 | potassium voltage-gated channel, subfamily H (eag-related), member 6 /// potassium voltage-gated channel, subfamily H (eag-related), member 6 | KCNH6   |
| 219799_s_at | 198.1  | 82    | 2562.8  | 30.6  | 41.9 | dehydrogenase/reductase (SDR family) member 9                                                                                                 | DHRS9   |
| 202803_s_at | 827.9  | 622.5 | 7958.6  | 236.1 | 41.9 | integrin, beta 2 (antigen CD18 (p95), lymphocyte function-associated antigen 1; macrophage antigen 1 (mac-1) beta subunit)                    | ITGB2   |
| 221157_s_at | 25.8   | 14.7  | 294.4   | 5     | 41.9 | F-box protein 24                                                                                                                              | FBXO24  |
| 202411_at   | 184.7  | 70.5  | 20733   | 10.7  | 41.9 | interferon, alpha-inducible protein 27                                                                                                        | IFI27   |
| 206986_at   | 35.2   | 16.2  | 238.3   | 5.6   | 41.9 | fibroblast growth factor 18                                                                                                                   | FGF18   |
| 203550_s_at | 191    | 73.5  | 1361.8  | 46.2  | 41.5 | chromosome 1 open reading frame 2                                                                                                             | C1orf2  |
| 210586_x_at | 69.6   | 27.6  | 8076.6  | 14    | 41.5 | Rhesus blood group, D antigen                                                                                                                 | RHD     |
| 215874_at   | 144.7  | 31.8  | 1354    | 54.7  | 41.5 | ST3 beta-galactoside alpha-2,3-sialyltransferase 1                                                                                            | ST3GAL1 |
| 219201_s_at | 12.2   | 6.1   | 317.3   | 5.3   | 41.5 | twisted gastrulation homolog 1 (Drosophila)                                                                                                   | TWSG1   |
| 219363_s_at | 245.9  | 138.9 | 938.5   | 70.7  | 41.5 | MTERF domain containing 1                                                                                                                     | MTERFD1 |
| 222134_at   | 23.2   | 8.2   | 453.2   | 6.7   | 41.5 | D-aspartate oxidase                                                                                                                           | DDO     |
| 202431_s_at | 1088.3 | 130.1 | 8590.2  | 54.6  | 41.5 | v-myc myelocytomatosis viral oncogene homolog (avian)                                                                                         | MYC     |
| 219913_s_at | 297.8  | 220.7 | 1053.6  | 40.1  | 41.5 | Crn, crooked neck-like 1 (Drosophila)                                                                                                         | CRNKL1  |
| 202196_s_at | 8.5    | 3.5   | 592.6   | 0.8   | 41.5 | dickkopf homolog 3 (Xenopus laevis)                                                                                                           | DKK3    |
| 217559_at   | 143.2  | 78.6  | 819.1   | 28.8  | 41.5 | ribosomal protein L10-like                                                                                                                    | RPL10L  |
| 205442_at   | 23.3   | 7.8   | 1395.9  | 2.4   | 41.5 | microfibrillar-associated protein 3-like                                                                                                      | MFAP3L  |

|             |        |        |         |        |      |                                                                                    |                 |
|-------------|--------|--------|---------|--------|------|------------------------------------------------------------------------------------|-----------------|
| 212915_at   | 12     | 5.1    | 653.8   | 1      | 41.5 | PDZ domain containing RING finger 3                                                | PDZRN3          |
| 205424_at   | 91.1   | 72.1   | 711.9   | 20.3   | 41.5 | ProSAPiP2 protein                                                                  | ProSAPiP2       |
| 204288_s_at | 30.9   | 16.4   | 1075.6  | 8.8    | 41.1 | sorbin and SH3 domain containing 2                                                 | SORBS2          |
| 211250_s_at | 123.7  | 10.2   | 1289.1  | 9.9    | 41.1 | SH3-domain binding protein 2                                                       | SH3BP2          |
| 211565_at   | 111.6  | 8      | 1229.6  | 11.1   | 41.1 | SH3-domain GRB2-like 3                                                             | SH3GL3          |
| 212759_s_at | 50.3   | 20     | 1354.5  | 11.1   | 41.1 | transcription factor 7-like 2 (T-cell specific, HMG-box)                           | TCF7L2          |
| 213269_at   | 161.6  | 26.4   | 990     | 13.7   | 41.1 | zinc finger protein 248                                                            | ZNF248          |
| 202933_s_at | 87.6   | 7.7    | 1307.2  | 3      | 41.1 | v-yes-1 Yamaguchi sarcoma viral oncogene homolog 1                                 | YES1            |
| 204319_s_at | 323.1  | 27     | 3182.8  | 9.5    | 41.1 | regulator of G-protein signalling 10                                               | RGS10           |
| 206179_s_at | 33.8   | 13.5   | 280.9   | 6.4    | 41.1 | brain-specific protein p25 alpha                                                   | TPPP            |
| 202694_at   | 23.1   | 10.3   | 411.9   | 4.7    | 41.1 | serine/threonine kinase 17a (apoptosis-inducing)                                   | STK17A          |
| 213317_at   | 62.8   | 11.5   | 4466.4  | 1.6    | 41.1 | Chloride intracellular channel 5                                                   | CLIC5           |
| 221790_s_at | 153.6  | 46.8   | 3617.7  | 12.9   | 41.1 | low density lipoprotein receptor adaptor protein 1                                 | LDLRAP1         |
| 209168_at   | 202.8  | 133.5  | 2043.8  | 18.8   | 41.1 | glycoprotein M6B                                                                   | GPM6B           |
| 204430_s_at | 433.8  | 96.8   | 8380.8  | 16.8   | 41.1 | solute carrier family 2 (facilitated glucose/fructose transporter), member 5       | SLC2A5          |
| 203111_s_at | 266.2  | 23.4   | 2421.3  | 22.9   | 40.7 | PTK2B protein tyrosine kinase 2 beta                                               | PTK2B           |
| 204011_at   | 238.2  | 32.7   | 4642.4  | 23.3   | 40.7 | sprouty homolog 2 (Drosophila)                                                     | SPRY2           |
| 206077_at   | 98.8   | 27.1   | 3637.6  | 19.7   | 40.7 | Kell blood group                                                                   | KEL             |
| 208460_at   | 116.9  | 25.4   | 674.9   | 13.3   | 40.7 | gap junction protein, alpha 7, 45kDa (connexin 45)                                 | GJA7            |
| 210401_at   | 875.3  | 442.5  | 5542.9  | 273.2  | 40.7 | purinergic receptor P2X, ligand-gated ion channel, 1                               | P2RX1           |
| 212186_at   | 66.1   | 36.6   | 986.1   | 28.3   | 40.7 | acetyl-Coenzyme A carboxylase alpha                                                | ACACA           |
| 212199_at   | 654.1  | 450.9  | 2384.1  | 261.7  | 40.7 | Morf4 family associated protein 1-like 1                                           | MRFAP1L1        |
| 201887_at   | 159.2  | 81.2   | 2829.5  | 30.4   | 40.7 | interleukin 13 receptor, alpha 1                                                   | IL13RA1         |
| 205259_at   | 116.8  | 12.2   | 2391.5  | 4      | 40.7 | nuclear receptor subfamily 3, group C, member 2                                    | NR3C2           |
| 206150_at   | 440.2  | 65.5   | 5428.4  | 25.6   | 40.7 | tumor necrosis factor receptor superfamily, member 7                               | TNFRSF7         |
| 214298_x_at | 1264.2 | 1096.3 | 7522.7  | 184.1  | 40.7 | septin 6                                                                           | SEPT6           |
| 210390_s_at | 39.8   | 11.9   | 314.9   | 3.3    | 40.7 | chemokine (C-C motif) ligand 14 /// chemokine (C-C motif) ligand 15                | CCL14 /// CCL15 |
| 202746_at   | 186.5  | 152.4  | 9006.6  | 24.9   | 40.7 | integral membrane protein 2A                                                       | ITM2A           |
| 211286_x_at | 39.9   | 21.4   | 331.6   | 7.4    | 40.7 | colony stimulating factor 2 receptor, alpha, low-affinity (granulocyte-macrophage) | CSF2RA          |
| 220089_at   | 63.8   | 22.6   | 573.9   | 6      | 40.7 | L-2-hydroxyglutarate dehydrogenase                                                 | L2HGDH          |
| 200736_s_at | 2887.8 | 1921.6 | 31355.7 | 1488.8 | 40.4 | glutathione peroxidase 1                                                           | GPX1            |
| 204468_s_at | 12.2   | 5.1    | 736.9   | 3.6    | 40.4 | tyrosine kinase with immunoglobulin-like and EGF-like domains 1                    | TIE1            |
| 210094_s_at | 165    | 41.8   | 1041.4  | 27.5   | 40.4 | par-3 partitioning defective 3 homolog (C. elegans)                                | PARD3           |
| 217984_at   | 1991.8 | 1242.4 | 15329.1 | 851.9  | 40.4 | ribonuclease T2                                                                    | RNASET2         |
| 219829_at   | 31.7   | 12.6   | 379.4   | 9.6    | 40.4 | integrin beta 1 binding protein (melusin) 2                                        | ITGB1BP2        |

|             |        |        |         |       |      |                                                                                                                                                                                                                   |               |
|-------------|--------|--------|---------|-------|------|-------------------------------------------------------------------------------------------------------------------------------------------------------------------------------------------------------------------|---------------|
| 64064_at    | 439.2  | 266.2  | 4543.4  | 171.3 | 40.4 | GTPase, IMAP family member 5                                                                                                                                                                                      | GIMAP5        |
| 208966_x_at | 3288.9 | 1811.3 | 12809.7 | 786.3 | 40.4 | interferon, gamma-inducible protein 16                                                                                                                                                                            | IFI16         |
| 213888_s_at | 336    | 144.1  | 2671.9  | 10.8  | 40.4 | TRAF3 interacting protein 3                                                                                                                                                                                       | TRAF3IP3      |
| 203104_at   | 156.1  | 81.9   | 4853.9  | 20.2  | 40.4 | colony stimulating factor 1 receptor, formerly McDonough feline sarcoma viral (v-fms) oncogene homolog /// colony stimulating factor 1 receptor, formerly McDonough feline sarcoma viral (v-fms) oncogene homolog | CSF1R         |
| 202668_at   | 282.8  | 98.6   | 4724.3  | 7.1   | 40.4 | ephrin-B2                                                                                                                                                                                                         | EFNB2         |
| 203110_at   | 942.9  | 657.8  | 4194.4  | 419.8 | 40.0 | PTK2B protein tyrosine kinase 2 beta                                                                                                                                                                              | PTK2B         |
| 203688_at   | 756.1  | 258    | 5245.7  | 177   | 40.0 | polycystic kidney disease 2 (autosomal dominant)                                                                                                                                                                  | PKD2          |
| 207358_x_at | 775.4  | 601.9  | 3134.2  | 315.2 | 40.0 | microtubule-actin crosslinking factor 1                                                                                                                                                                           | MACF1         |
| 209631_s_at | 9.4    | 2.2    | 423.1   | 1.3   | 40.0 | G protein-coupled receptor 37 (endothelin receptor type B-like)                                                                                                                                                   | GPR37         |
| 210066_s_at | 8.2    | 4.2    | 183.1   | 1.1   | 40.0 | aquaporin 4                                                                                                                                                                                                       | AQP4          |
| 213848_at   | 330.6  | 78.2   | 2652.2  | 24.4  | 40.0 | Dual specificity phosphatase 7                                                                                                                                                                                    | DUSP7         |
| 220850_at   | 12.6   | 3.9    | 357.8   | 1.1   | 40.0 | MORC family CW-type zinc finger 1                                                                                                                                                                                 | MORC1         |
| 218816_at   | 33.6   | 13.1   | 422.8   | 6.1   | 40.0 | leucine rich repeat containing 1                                                                                                                                                                                  | LRRC1         |
| 203817_at   | 196.6  | 124    | 1401.8  | 10.1  | 40.0 | ---                                                                                                                                                                                                               | ---           |
| 204915_s_at | 63     | 13.8   | 2637.5  | 4     | 40.0 | SRY (sex determining region Y)-box 11                                                                                                                                                                             | SOX11         |
| 218966_at   | 1090.3 | 549.8  | 4844.8  | 343.3 | 39.6 | myosin VC                                                                                                                                                                                                         | MYO5C         |
| 51146_at    | 86.5   | 10.7   | 414.5   | 8.2   | 39.6 | phosphatidylinositol glycan, class V                                                                                                                                                                              | PIGV          |
| 205528_s_at | 17     | 3.2    | 436     | 1.4   | 39.6 | runt-related transcription factor 1; translocated to, 1 (cyclin D-related)                                                                                                                                        | RUNX1T1       |
| 215388_s_at | 5.7    | 3.2    | 626     | 1.4   | 39.6 | complement factor H /// complement factor H-related 1                                                                                                                                                             | CFH /// CFHL1 |
| 215672_s_at | 114.2  | 49     | 643.7   | 18.7  | 39.6 | KIAA0828 protein                                                                                                                                                                                                  | KIAA0828      |
| 202178_at   | 49.4   | 16.9   | 9160.2  | 6.6   | 39.6 | protein kinase C, zeta                                                                                                                                                                                            | PRKCZ         |
| 209670_at   | 561.5  | 298    | 15751.4 | 97.6  | 39.6 | T cell receptor alpha constant /// T cell receptor alpha constant                                                                                                                                                 | TRAC          |
| 200986_at   | 142.2  | 25.8   | 1035.7  | 8.5   | 39.6 | serpin peptidase inhibitor, clade G (C1 inhibitor), member 1, (angioedema, hereditary)                                                                                                                            | SERPING1      |
| 217440_at   | 26.3   | 4      | 796.2   | 0.5   | 39.6 | MRNA; cDNA DKFZp566A193 (from clone DKFZp566A193)                                                                                                                                                                 | ---           |
| 213920_at   | 47.8   | 18.4   | 592.2   | 5.6   | 39.6 | cut-like 2 (Drosophila)                                                                                                                                                                                           | CUTL2         |
| 212489_at   | 390.1  | 192    | 2846.1  | 5.9   | 39.6 | collagen, type V, alpha 1                                                                                                                                                                                         | COL5A1        |
| 213831_at   | 519.5  | 80.8   | 9979.3  | 8.5   | 39.6 | major histocompatibility complex, class II, DQ alpha 1                                                                                                                                                            | HLA-DQA1      |
| 201811_x_at | 1176.8 | 559    | 14168.3 | 14    | 39.6 | SH3-domain binding protein 5 (BTK-associated)                                                                                                                                                                     | SH3BP5        |
| 203116_s_at | 499.9  | 411.2  | 22232   | 218.8 | 39.3 | ferrochelatase (protoporphyrin)                                                                                                                                                                                   | FECH          |
| 213280_at   | 326    | 39.5   | 2453.6  | 21.7  | 39.3 | GTPase activating Rap/RanGAP domain-like 4                                                                                                                                                                        | GARNL4        |

|             |        |       |         |       |      |                                                                                                                                                                                                                                                          |                                                                                                                    |
|-------------|--------|-------|---------|-------|------|----------------------------------------------------------------------------------------------------------------------------------------------------------------------------------------------------------------------------------------------------------|--------------------------------------------------------------------------------------------------------------------|
|             |        |       |         |       |      | hypothetical LOC283768 /// similar to hypothetical protein /// similar to hypothetical protein /// golgi autoantigen, golgin family member /// similar to hypothetical protein /// similar to hypothetical protein /// hypothetical protein DKFZp434P162 | LOC283768 ///<br>LOC388080 ///<br>LOC388189 ///<br>LOC390535 ///<br>LOC400304 ///<br>LOC440234 ///<br>DKFZp434P162 |
| 213737_x_at | 599.4  | 466   | 12405.3 | 237.8 | 39.3 |                                                                                                                                                                                                                                                          |                                                                                                                    |
| 218864_at   | 47.5   | 11.1  | 3993.7  | 10.3  | 39.3 | tensin 1                                                                                                                                                                                                                                                 | TNS1                                                                                                               |
| 218980_at   | 24.5   | 6.5   | 632.6   | 5.8   | 39.3 | formin homology 2 domain containing 3                                                                                                                                                                                                                    | FHOD3                                                                                                              |
| 208613_s_at | 185.1  | 40.9  | 4202.2  | 15.4  | 39.3 | filamin B, beta (actin binding protein 278)                                                                                                                                                                                                              | FLNB                                                                                                               |
| 218536_at   | 202.7  | 131.6 | 826.2   | 7.1   | 39.3 | MRS2-like, magnesium homeostasis factor (S. cerevisiae)                                                                                                                                                                                                  | MRS2L                                                                                                              |
| 208303_s_at | 47.2   | 25.1  | 2971.8  | 6.9   | 39.3 | cytokine receptor-like factor 2                                                                                                                                                                                                                          | CRLF2                                                                                                              |
| 216620_s_at | 192.7  | 27.7  | 3588.2  | 12.3  | 39.3 | Rho guanine nucleotide exchange factor (GEF) 10                                                                                                                                                                                                          | ARHGEF10                                                                                                           |
| 205715_at   | 26.5   | 18.8  | 1743.7  | 7.5   | 39.3 | bone marrow stromal cell antigen 1                                                                                                                                                                                                                       | BST1                                                                                                               |
| 215017_s_at | 148.3  | 71.4  | 866.3   | 2.2   | 39.3 | formin binding protein 1-like                                                                                                                                                                                                                            | FNBP1L                                                                                                             |
| 207218_at   | 63     | 24.6  | 565.5   | 3.5   | 39.3 | coagulation factor IX (plasma thromboplastic component, Christmas disease, hemophilia B)                                                                                                                                                                 | F9                                                                                                                 |
| 208654_s_at | 1274.4 | 754.9 | 15234.8 | 667.6 | 38.9 | CD164 antigen, sialomucin                                                                                                                                                                                                                                | CD164                                                                                                              |
| 209638_x_at | 41.2   | 3.4   | 532.9   | 1.8   | 38.9 | regulator of G-protein signalling 12                                                                                                                                                                                                                     | RGS12                                                                                                              |
| 214049_x_at | 38.7   | 15.3  | 2222.3  | 7.7   | 38.9 | CD7 antigen (p41)                                                                                                                                                                                                                                        | CD7                                                                                                                |
| 218965_s_at | 75.9   | 13.5  | 397.8   | 9.5   | 38.9 | RNA binding motif protein 21                                                                                                                                                                                                                             | RBM21                                                                                                              |
| 220751_s_at | 52     | 19.2  | 4567.8  | 11.3  | 38.9 | chromosome 5 open reading frame 4                                                                                                                                                                                                                        | C5orf4                                                                                                             |
| 202275_at   | 226.8  | 115   | 4046.1  | 45.6  | 38.9 | glucose-6-phosphate dehydrogenase                                                                                                                                                                                                                        | G6PD                                                                                                               |
| 219191_s_at | 67.1   | 28.6  | 1955.3  | 9.7   | 38.9 | bridging integrator 2                                                                                                                                                                                                                                    | BIN2                                                                                                               |
| 218328_at   | 119.6  | 97.9  | 861.5   | 16.1  | 38.9 | coenzyme Q4 homolog (yeast)                                                                                                                                                                                                                              | COQ4                                                                                                               |
| 206622_at   | 58.4   | 45.3  | 3374    | 7.6   | 38.9 | thyrotropin-releasing hormone                                                                                                                                                                                                                            | TRH                                                                                                                |
| 203854_at   | 56     | 18.2  | 406.4   | 12.2  | 38.5 | I factor (complement)                                                                                                                                                                                                                                    | IF                                                                                                                 |
| 204462_s_at | 207.7  | 42.5  | 1528.7  | 26.5  | 38.5 | solute carrier family 16 (monocarboxylic acid transporters), member 2                                                                                                                                                                                    | SLC16A2                                                                                                            |
| 218361_at   | 251.4  | 34.4  | 1506.7  | 22.1  | 38.5 | golgi phosphoprotein 3-like                                                                                                                                                                                                                              | GOLPH3L                                                                                                            |
| 204187_at   | 133    | 21.5  | 10704.9 | 10.7  | 38.5 | guanosine monophosphate reductase /// guanosine monophosphate reductase                                                                                                                                                                                  | GMPR                                                                                                               |
| 209705_at   | 774.4  | 659.1 | 3152.7  | 307.1 | 38.5 | metal response element binding transcription factor 2                                                                                                                                                                                                    | MTF2                                                                                                               |
| 220232_at   | 570.7  | 370.1 | 6663.3  | 133   | 38.5 | stearoyl-CoA desaturase 5                                                                                                                                                                                                                                | SCD5                                                                                                               |
| 222273_at   | 172.6  | 109.8 | 752.1   | 30.5  | 38.5 | poly(A) polymerase gamma                                                                                                                                                                                                                                 | PAPOLG                                                                                                             |
| 200885_at   | 301.6  | 195.1 | 1938.3  | 60.7  | 38.5 | ras homolog gene family, member C                                                                                                                                                                                                                        | RHOC                                                                                                               |
| 205372_at   | 87.9   | 9.5   | 860     | 2.2   | 38.5 | pleiomorphic adenoma gene 1                                                                                                                                                                                                                              | PLAG1                                                                                                              |
| 215702_s_at | 19     | 9.1   | 222     | 2.4   | 38.5 | cystic fibrosis transmembrane conductance regulator, ATP-binding cassette (sub-family C, member 7)                                                                                                                                                       | CFTR                                                                                                               |

|             |        |        |         |        |      |                                                                                          |          |
|-------------|--------|--------|---------|--------|------|------------------------------------------------------------------------------------------|----------|
| 216123_x_at | 78.6   | 43.1   | 655.2   | 4.4    | 38.5 | CDNA FLJ14096 fis, clone MAMMA1000752                                                    | ---      |
| 214745_at   | 214.1  | 99.5   | 2085.9  | 2.2    | 38.5 | phospholipase C-like 3                                                                   | PLCL3    |
| 206995_x_at | 112.9  | 6.8    | 541.1   | 6.5    | 38.1 | scavenger receptor class F, member 1                                                     | SCARF1   |
| 210644_s_at | 2023.5 | 1311.6 | 9630.6  | 700    | 38.1 | leukocyte-associated Ig-like receptor 1                                                  | LAIR1    |
| 213518_at   | 198.1  | 59.3   | 773.3   | 47.3   | 38.1 | protein kinase C, iota                                                                   | PRKCI    |
| 216407_at   | 61.4   | 13.9   | 526.8   | 8.7    | 38.1 | Vac14 homolog (S. cerevisiae)                                                            | VAC14    |
| 204297_at   | 424.7  | 357.1  | 9590.8  | 156.3  | 38.1 | phosphoinositide-3-kinase, class 3                                                       | PIK3C3   |
| 205174_s_at | 23.2   | 5.3    | 712.9   | 1.9    | 38.1 | glutaminyl-peptide cyclotransferase (glutaminyl cyclase)                                 | QPCT     |
| 218989_x_at | 175.4  | 115    | 603     | 19.2   | 38.1 | solute carrier family 30 (zinc transporter), member 5                                    | SLC30A5  |
| 204759_at   | 484.7  | 307    | 9086.3  | 34.2   | 38.1 | regulator of chromosome condensation (RCC1) and BTB (POZ) domain containing protein 2    | RCBTB2   |
| 206479_at   | 17.1   | 5.8    | 214.2   | 1.8    | 38.1 | transient receptor potential cation channel, subfamily M, member 1                       | TRPM1    |
| 214012_at   | 126.4  | 71     | 1014.4  | 7.5    | 38.1 | type 1 tumor necrosis factor receptor shedding aminopeptidase regulator                  | ARTS-1   |
| 202451_at   | 260.2  | 193.2  | 861.3   | 16.8   | 38.1 | general transcription factor IIH, polypeptide 1, 62kDa                                   | GTF2H1   |
| 219797_at   | 103.8  | 72.9   | 686.8   | 4.2    | 38.1 | mannosyl (alpha-1,3-)-glycoprotein beta-1,4-N-acetylglucosaminyltransferase, isoenzyme A | MGAT4A   |
| 206637_at   | 298.6  | 54.2   | 4668.9  | 1.6    | 38.1 | purinergic receptor P2Y, G-protein coupled, 14                                           | P2RY14   |
| 203585_at   | 219.3  | 174    | 2221.3  | 40.4   | 38.1 | zinc finger protein 185 (LIM domain)                                                     | ZNF185   |
| 204700_x_at | 158.8  | 78.3   | 747     | 43.7   | 37.8 | chromosome 1 open reading frame 107                                                      | C1orf107 |
| 211924_s_at | 184.9  | 27.2   | 2286.6  | 32.1   | 37.8 | plasminogen activator, urokinase receptor /// plasminogen activator, urokinase receptor  | PLAUR    |
| 212977_at   | 93.2   | 5      | 1209.6  | 4.3    | 37.8 | chemokine orphan receptor 1                                                              | CMKOR1   |
| 206177_s_at | 130.3  | 68.7   | 3199    | 26.4   | 37.8 | arginase, liver                                                                          | ARG1     |
| 201302_at   | 300    | 203.7  | 2835.2  | 21.2   | 37.8 | annexin A4                                                                               | ANXA4    |
| 208343_s_at | 7.2    | 3      | 2604.5  | 1.1    | 37.8 | nuclear receptor subfamily 5, group A, member 2                                          | NR5A2    |
| 209615_s_at | 92.3   | 24.5   | 507.8   | 6.3    | 37.8 | p21/Cdc42/Rac1-activated kinase 1 (STE20 homolog, yeast)                                 | PAK1     |
| 220646_s_at | 79.7   | 23     | 801.8   | 5      | 37.8 | killer cell lectin-like receptor subfamily F, member 1                                   | KLRF1    |
| 204811_s_at | 112    | 50.8   | 1771.5  | 12.1   | 37.8 | calcium channel, voltage-dependent, alpha 2/delta subunit 2                              | CACNA2D2 |
| 205462_s_at | 310.4  | 171.9  | 2565.1  | 18.5   | 37.8 | hippocalcin-like 1                                                                       | HPCAL1   |
| 213096_at   | 320.3  | 249.8  | 14744.6 | 27.6   | 37.8 | transmembrane and coiled-coil domain family 2                                            | TMCC2    |
| 217901_at   | 110.4  | 74.5   | 1631    | 5.4    | 37.8 | Desmoglein 2                                                                             | DSG2     |
| 204204_at   | 87.5   | 26.1   | 918.5   | 13.1   | 37.4 | solute carrier family 31 (copper transporters), member 2                                 | SLC31A2  |
| 208073_x_at | 2070.2 | 1406.3 | 13227.3 | 1120.5 | 37.4 | tetratricopeptide repeat domain 3                                                        | TTC3     |

|             |        |        |         |       |      |                                                                                                                  |          |
|-------------|--------|--------|---------|-------|------|------------------------------------------------------------------------------------------------------------------|----------|
| 208799_at   | 545.7  | 302.9  | 2235    | 353.8 | 37.4 | proteasome (prosome, macropain) subunit, beta type, 5                                                            | PSMB5    |
| 214040_s_at | 41.5   | 10.3   | 2140.6  | 9     | 37.4 | gelsolin (amyloidosis, Finnish type)                                                                             | GSN      |
| 218417_s_at | 107.6  | 23.1   | 990.5   | 14.8  | 37.4 | hypothetical protein FLJ20489                                                                                    | FLJ20489 |
| 218659_at   | 2636.3 | 1222.8 | 19916.5 | 736.9 | 37.4 | additional sex combs like 2 (Drosophila)                                                                         | ASXL2    |
| 220178_at   | 140.7  | 11.2   | 1510.2  | 11.3  | 37.4 | chromosome 19 open reading frame 28                                                                              | C19orf28 |
| 221350_at   | 53.8   | 15.1   | 917.6   | 11.3  | 37.4 | homeo box C8                                                                                                     | HOXC8    |
| 205945_at   | 97.8   | 7      | 1113.7  | 3.3   | 37.4 | interleukin 6 receptor /// interleukin 6 receptor                                                                | IL6R     |
| 205614_x_at | 85.9   | 47.3   | 694.9   | 20.6  | 37.4 | macrophage stimulating 1 (hepatocyte growth factor-like)                                                         | MST1     |
| 202628_s_at | 27.6   | 18.9   | 1056.7  | 8     | 37.4 | serpin peptidase inhibitor, clade E (nexin, plasminogen activator inhibitor type 1), member 1                    | SERPINE1 |
| 205952_at   | 88.1   | 19.7   | 2026.6  | 8.6   | 37.4 | potassium channel, subfamily K, member 3                                                                         | KCNK3    |
| 210504_at   | 181.5  | 109    | 11394.7 | 31.4  | 37.4 | Kruppel-like factor 1 (erythroid)                                                                                | KLF1     |
| 46665_at    | 83.8   | 45.2   | 1801.6  | 15.5  | 37.4 | sema domain, immunoglobulin domain (Ig), transmembrane domain (TM) and short cytoplasmic domain, (semaphorin) 4C | SEMA4C   |
| 209543_s_at | 704.3  | 328.5  | 11548   | 98.4  | 37.4 | CD34 antigen                                                                                                     | CD34     |
| 205821_at   | 457.5  | 243    | 9684.2  | 45.4  | 37.4 | killer cell lectin-like receptor subfamily K, member 1                                                           | KLRK1    |
| 206233_at   | 245.2  | 162.6  | 1798.1  | 5.9   | 37.4 | UDP-Gal:betaGlcNAc beta 1,4- galactosyltransferase, polypeptide 6                                                | B4GALT6  |
| 206574_s_at | 244.7  | 135.8  | 2612.2  | 8.3   | 37.4 | protein tyrosine phosphatase type IVA, member 3                                                                  | PTP4A3   |
| 201363_s_at | 313.2  | 120.7  | 1430.5  | 98.9  | 37.0 | influenza virus NS1A binding protein                                                                             | IVNS1ABP |
| 203254_s_at | 297.5  | 188.7  | 1554.2  | 131.8 | 37.0 | talin 1                                                                                                          | TLN1     |
| 206343_s_at | 20.8   | 8.8    | 1783.2  | 5.1   | 37.0 | neuregulin 1                                                                                                     | NRG1     |
| 208594_x_at | 398.6  | 305.3  | 3235.8  | 170.4 | 37.0 | leukocyte immunoglobulin-like receptor, subfamily A (with TM domain), member 6                                   | LILRA6   |
| 210030_at   | 46.4   | 13.8   | 557.9   | 9.9   | 37.0 | ---                                                                                                              | ---      |
| 213854_at   | 323.8  | 36.7   | 1730.3  | 26    | 37.0 | synaptogyrin 1                                                                                                   | SYNGR1   |
| 215299_x_at | 681.9  | 407.1  | 4249.4  | 370.6 | 37.0 | sulfotransferase family, cytosolic, 1A, phenol-preferring, member 1                                              | SULT1A1  |
| 220285_at   | 932.1  | 658.1  | 4858.2  | 331.9 | 37.0 | chromosome 9 open reading frame 77                                                                               | C9orf77  |
| 220684_at   | 244.3  | 156.4  | 1550.4  | 83.4  | 37.0 | T-box 21                                                                                                         | TBX21    |
| 221747_at   | 332.6  | 46.9   | 5156.1  | 40.1  | 37.0 | Tensin 1 /// Tensin 1                                                                                            | TNS1     |
| 204513_s_at | 515.9  | 363    | 4569.4  | 120.1 | 37.0 | engulfment and cell motility 1 (ced-12 homolog, C. elegans)                                                      | ELMO1    |
| 208109_s_at | 57.6   | 9.4    | 790.8   | 4.4   | 37.0 | chromosome 15 open reading frame 5 /// chromosome 15 open reading frame 5                                        | C15orf5  |
| 213364_s_at | 220.2  | 97.9   | 1125.3  | 36.8  | 37.0 | sorting nexin 1                                                                                                  | SNX1     |
| 203949_at   | 269.1  | 88     | 44296   | 25    | 37.0 | myeloperoxidase                                                                                                  | MPO      |

|             |       |        |         |       |      |                                                                                                                                                                                                                                          |                                                                                       |
|-------------|-------|--------|---------|-------|------|------------------------------------------------------------------------------------------------------------------------------------------------------------------------------------------------------------------------------------------|---------------------------------------------------------------------------------------|
| 201109_s_at | 26.2  | 13.5   | 1803    | 3.3   | 37.0 | thrombospondin 1                                                                                                                                                                                                                         | THBS1                                                                                 |
| 205983_at   | 581   | 207.2  | 7380    | 21.6  | 37.0 | dipeptidase 1 (renal)                                                                                                                                                                                                                    | DPEP1                                                                                 |
| 218742_at   | 406.8 | 167.4  | 2459.7  | 21.9  | 37.0 | nuclear prelamin A recognition factor-like                                                                                                                                                                                               | NARFL                                                                                 |
| 212828_at   | 257.9 | 134.8  | 2422.8  | 27.5  | 37.0 | synaptojanin 2                                                                                                                                                                                                                           | SYNJ2                                                                                 |
| 209576_at   | 205.7 | 169.9  | 1733.8  | 11.3  | 37.0 | guanine nucleotide binding protein (G protein), alpha inhibiting activity polypeptide 1                                                                                                                                                  | GNAI1                                                                                 |
| 212526_at   | 62.9  | 14.9   | 996.9   | 3     | 37.0 | spastic paraplegia 20, spartin (Troyer syndrome)                                                                                                                                                                                         | SPG20                                                                                 |
| 205463_s_at | 139.4 | 41.4   | 3342.1  | 5.5   | 37.0 | platelet-derived growth factor alpha polypeptide                                                                                                                                                                                         | PDGFA                                                                                 |
| 203988_s_at | 226.8 | 20     | 1797.6  | 12.4  | 36.7 | fucosyltransferase 8 (alpha (1,6) fucosyltransferase)                                                                                                                                                                                    | FUT8                                                                                  |
| 212181_s_at | 595.8 | 508.9  | 7196.3  | 373.3 | 36.7 | nudix (nucleoside diphosphate linked moiety X)-type motif 4                                                                                                                                                                              | NUDT4                                                                                 |
| 214255_at   | 161.3 | 24.5   | 2123.3  | 18.3  | 36.7 | ATPase, Class V, type 10A                                                                                                                                                                                                                | ATP10A                                                                                |
| 213063_at   | 305.7 | 237    | 1454.3  | 91.9  | 36.7 | nuclear protein UKp68                                                                                                                                                                                                                    | FLJ11806                                                                              |
| 209210_s_at | 88.1  | 16.6   | 1212.8  | 4.9   | 36.7 | pleckstrin homology domain containing, family C (with FERM domain) member 1                                                                                                                                                              | PLEKHC1                                                                               |
| 204401_at   | 175.2 | 51.2   | 2120.8  | 12    | 36.7 | potassium intermediate/small conductance calcium-activated channel, subfamily N, member 4                                                                                                                                                | KCNN4                                                                                 |
| 201848_s_at | 151.7 | 93.2   | 778.4   | 7.9   | 36.7 | BCL2/adenovirus E1B 19kDa interacting protein 3                                                                                                                                                                                          | BNIP3                                                                                 |
| 214453_s_at | 296.5 | 109.3  | 6049.8  | 43.3  | 36.7 | interferon-induced protein 44                                                                                                                                                                                                            | IFI44                                                                                 |
| 218892_at   | 149.5 | 36.5   | 863.8   | 12.8  | 36.7 | dachsous 1 (Drosophila)                                                                                                                                                                                                                  | DCHS1                                                                                 |
| 201324_at   | 94.7  | 14.1   | 3238.4  | 3.7   | 36.7 | epithelial membrane protein 1                                                                                                                                                                                                            | EMP1                                                                                  |
| 201029_s_at | 4746  | 2562.3 | 29103.9 | 689.6 | 36.7 | CD99 antigen                                                                                                                                                                                                                             | CD99                                                                                  |
| 203038_at   | 353   | 73.2   | 5596.8  | 6.7   | 36.7 | protein tyrosine phosphatase, receptor type, K                                                                                                                                                                                           | PTPRK                                                                                 |
| 218035_s_at | 174.4 | 73.7   | 1360.7  | 16.9  | 36.7 | RNA-binding protein                                                                                                                                                                                                                      | FLJ20273                                                                              |
| 203029_s_at | 22.1  | 12.1   | 1684    | 9.2   | 36.3 | protein tyrosine phosphatase, receptor type, N polypeptide 2                                                                                                                                                                             | PTPRN2                                                                                |
| 203040_s_at | 462.5 | 424.8  | 20562.7 | 233.3 | 36.3 | hydroxymethylbilane synthase                                                                                                                                                                                                             | HMBS                                                                                  |
| 211876_x_at | 22.8  | 6      | 700.3   | 5.1   | 36.3 | protocadherin gamma subfamily A, 12 /// protocadherin gamma subfamily A, 11 /// protocadherin gamma subfamily A, 10 /// protocadherin gamma subfamily A, 6 /// protocadherin gamma subfamily A, 5 /// protocadherin gamma subfamily A, 3 | PCDHGA12 ///<br>PCDHGA11 ///<br>PCDHGA10 ///<br>PCDHGA6 ///<br>PCDHGA5 ///<br>PCDHGA3 |
| 216298_at   | 85.4  | 4      | 508.1   | 3.8   | 36.3 | T cell receptor gamma constant 2                                                                                                                                                                                                         | LOC442535                                                                             |
| 219701_at   | 38.1  | 4.3    | 619.8   | 2.4   | 36.3 | tropomodulin 2 (neuronal)                                                                                                                                                                                                                | TMOD2                                                                                 |
| 221081_s_at | 358   | 48.4   | 2899.8  | 32.4  | 36.3 | DENN/MADD domain containing 2D                                                                                                                                                                                                           | DENND2D                                                                               |
| 209963_s_at | 127.9 | 49.4   | 1950.4  | 17.8  | 36.3 | erythropoietin receptor                                                                                                                                                                                                                  | EPOR                                                                                  |
| 217096_at   | 43    | 9.2    | 442.9   | 3.5   | 36.3 | piccolo (presynaptic cytomatrix protein)                                                                                                                                                                                                 | PCLO                                                                                  |
| 217820_s_at | 138.3 | 13.4   | 1021.9  | 6.3   | 36.3 | enabled homolog (Drosophila)                                                                                                                                                                                                             | ENAH                                                                                  |
| 205390_s_at | 29.7  | 26.3   | 3939.1  | 9.5   | 36.3 | ankyrin 1, erythrocytic /// ankyrin 1, erythrocytic                                                                                                                                                                                      | ANK1                                                                                  |



|             |        |        |         |       |      |                                                                                                                                                                         |           |
|-------------|--------|--------|---------|-------|------|-------------------------------------------------------------------------------------------------------------------------------------------------------------------------|-----------|
| 206366_x_at | 44     | 24.7   | 564.3   | 6     | 36.3 | chemokine (C motif) ligand 2                                                                                                                                            | XCL2      |
| 211568_at   | 19.9   | 3.1    | 728.8   | 1.5   | 36.3 | brain-specific angiogenesis inhibitor 3                                                                                                                                 | BAI3      |
| 213894_at   | 96     | 24.3   | 2885.9  | 6.1   | 36.3 | KIAA0960 protein                                                                                                                                                        | KIAA0960  |
| 212314_at   | 339.9  | 155.7  | 7986.2  | 55.6  | 36.3 | KIAA0746 protein                                                                                                                                                        | KIAA0746  |
| 222136_x_at | 519.1  | 310.1  | 2538.9  | 98.6  | 36.3 | zinc finger protein 43 (HTF6)                                                                                                                                           | ZNF43     |
| 205159_at   | 439.5  | 343.6  | 2239.7  | 154.7 | 36.3 | colony stimulating factor 2 receptor, beta, low-affinity (granulocyte-macrophage) /// colony stimulating factor 2 receptor, beta, low-affinity (granulocyte-macrophage) | CSF2RB    |
| 220789_s_at | 101.1  | 70.6   | 573.6   | 29    | 36.3 | transforming growth factor beta regulator 4                                                                                                                             | TBRG4     |
| 204891_s_at | 418.3  | 189    | 5581.2  | 30.7  | 36.3 | lymphocyte-specific protein tyrosine kinase                                                                                                                             | LCK       |
| 212443_at   | 263.3  | 138.7  | 2162    | 17.1  | 36.3 | neurobeachin-like 2                                                                                                                                                     | NBEAL2    |
| 202992_at   | 34.6   | 19.2   | 645.1   | 3.7   | 36.3 | complement component 7                                                                                                                                                  | C7        |
| 210435_at   | 45.6   | 22.2   | 280.1   | 2.7   | 36.3 | neighbor of BRCA1 gene 2                                                                                                                                                | NBR2      |
| 202630_at   | 200.3  | 121.9  | 895.5   | 73    | 35.9 | amyloid beta precursor protein (cytoplasmic tail) binding protein 2                                                                                                     | APPBP2    |
| 203381_s_at | 29.3   | 10.4   | 1129.3  | 5.6   | 35.9 | apolipoprotein E                                                                                                                                                        | APOE      |
| 212095_s_at | 47.9   | 11     | 574.8   | 7.8   | 35.9 | mitochondrial tumor suppressor 1                                                                                                                                        | MTUS1     |
| 212151_at   | 114.4  | 30.4   | 10825.3 | 16.5  | 35.9 | Pre-B-cell leukemia transcription factor 1                                                                                                                              | PBX1      |
| 213994_s_at | 9.7    | 3.2    | 676     | 2.1   | 35.9 | spondin 1, extracellular matrix protein                                                                                                                                 | SPON1     |
| 218762_at   | 53.7   | 24.8   | 851.9   | 17.7  | 35.9 | zinc finger protein 574                                                                                                                                                 | ZNF574    |
| 219149_x_at | 129    | 42.5   | 571.6   | 38.9  | 35.9 | debranching enzyme homolog 1 (S. cerevisiae)                                                                                                                            | DBR1      |
| 205862_at   | 23.7   | 2.3    | 422     | 1     | 35.9 | GREB1 protein                                                                                                                                                           | GREB1     |
| 211450_s_at | 1390   | 769.9  | 6721.5  | 168   | 35.9 | mutS homolog 6 (E. coli)                                                                                                                                                | MSH6      |
| 213882_at   | 117.5  | 19     | 636.6   | 5.8   | 35.9 | TM2 domain containing 1                                                                                                                                                 | TM2D1     |
| 215842_s_at | 43.1   | 5.5    | 1086.9  | 2.7   | 35.9 | ATPase, Class VI, type 11A                                                                                                                                              | ATP11A    |
| 216565_x_at | 484.6  | 268.2  | 3433.7  | 128.6 | 35.9 | similar to Interferon-induced transmembrane protein 3 (Interferon-inducible protein 1-8U)                                                                               | LOC391020 |
| 220577_at   | 283.9  | 196.6  | 1308.8  | 83    | 35.9 | GTPase, very large interferon inducible 1                                                                                                                               | GVIN1     |
| 207968_s_at | 679.1  | 449.9  | 2961.8  | 79.5  | 35.9 | MADS box transcription enhancer factor 2, polypeptide C (myocyte enhancer factor 2C)                                                                                    | MEF2C     |
| 212761_at   | 621.5  | 511.4  | 4998.4  | 101.8 | 35.9 | transcription factor 7-like 2 (T-cell specific, HMG-box)                                                                                                                | TCF7L2    |
| 217067_s_at | 20.2   | 4.4    | 741.1   | 1.9   | 35.9 | dentin matrix acidic phosphoprotein                                                                                                                                     | DMP1      |
| 212979_s_at | 100.9  | 40.9   | 523.5   | 4.8   | 35.9 | KIAA0738 gene product                                                                                                                                                   | KIAA0738  |
| 218402_s_at | 945    | 647.2  | 5332.1  | 139.5 | 35.9 | Hermansky-Pudlak syndrome 4                                                                                                                                             | HPS4      |
| 219048_at   | 189.5  | 37.2   | 963.8   | 12.3  | 35.9 | phosphatidylinositol glycan, class N                                                                                                                                    | PIGN      |
| 221558_s_at | 4751.5 | 2901.3 | 16261.4 | 242.4 | 35.9 | lymphoid enhancer-binding factor 1                                                                                                                                      | LEF1      |
| 201189_s_at | 357.3  | 98     | 2314    | 12.8  | 35.9 | inositol 1,4,5-triphosphate receptor, type 3                                                                                                                            | ITPR3     |
| 202540_s_at | 165.2  | 26.9   | 835.4   | 20.7  | 35.6 | 3-hydroxy-3-methylglutaryl-Coenzyme A reductase                                                                                                                         | HMGCR     |
| 210655_s_at | 89.9   | 21.2   | 6692.2  | 10.7  | 35.6 | forkhead box O3A                                                                                                                                                        | FOXO3A    |

|             |        |        |         |       |      |                                                                                                                                                                                      |                                                                    |
|-------------|--------|--------|---------|-------|------|--------------------------------------------------------------------------------------------------------------------------------------------------------------------------------------|--------------------------------------------------------------------|
| 213395_at   | 126    | 7.5    | 1760    | 9.8   | 35.6 | megalencephalic leukoencephalopathy with subcortical cysts 1                                                                                                                         | MLC1                                                               |
| 203574_at   | 307.6  | 223.4  | 9812.8  | 43.7  | 35.6 | nuclear factor, interleukin 3 regulated                                                                                                                                              | NFIL3                                                              |
| 210615_at   | 40.3   | 12.7   | 335.3   | 3.2   | 35.6 | neuropilin 1                                                                                                                                                                         | NRP1                                                               |
| 202833_s_at | 107.1  | 24.3   | 1493.7  | 8.1   | 35.6 | serpin peptidase inhibitor, clade A (alpha-1 antitrypsin, antitrypsin), member 1                                                                                                     | SERPINA1                                                           |
| 205098_at   | 220.8  | 141.3  | 2242.5  | 36.1  | 35.6 | chemokine (C-C motif) receptor 1                                                                                                                                                     | CCR1                                                               |
| 220922_s_at | 43.1   | 19     | 1787.1  | 6.8   | 35.6 | sperm protein associated with the nucleus, X-linked, family member A1 /// SPANX family, member B1 /// SPANX family, member A2 /// SPANX family, member C /// SPANX family, member B2 | SPANXA1 ///<br>SPANXB1 ///<br>SPANXA2 ///<br>SPANXC ///<br>SPANXB2 |
| 218656_s_at | 124.8  | 34.5   | 1094.7  | 9.4   | 35.6 | lipoma HMGIC fusion partner                                                                                                                                                          | LHFP                                                               |
| 201341_at   | 245.6  | 58.5   | 1313.2  | 65.5  | 35.2 | ectodermal-neural cortex (with BTB-like domain)                                                                                                                                      | ENC1                                                               |
| 202039_at   | 2536.6 | 1152.1 | 12225.9 | 882.4 | 35.2 | TGFB1-induced anti-apoptotic factor 1 /// myosin XVIII A                                                                                                                             | TIAF1 ///<br>MYO18A                                                |
| 202441_at   | 514.4  | 310.1  | 3817.2  | 227.7 | 35.2 | SPFH domain family, member 1                                                                                                                                                         | SPFH1                                                              |
| 204158_s_at | 312.4  | 27.1   | 2026.7  | 13.6  | 35.2 | T-cell, immune regulator 1, ATPase, H+ transporting, lysosomal V0 protein a isoform 3                                                                                                | TCIRG1                                                             |
| 204417_at   | 307.3  | 192.3  | 1291    | 152.9 | 35.2 | galactosylceramidase (Krabbe disease)                                                                                                                                                | GALC                                                               |
| 205702_at   | 212.7  | 167    | 922.4   | 94.3  | 35.2 | putative homeodomain transcription factor 1                                                                                                                                          | PHTF1                                                              |
| 208664_s_at | 378.6  | 46.8   | 2577.1  | 15.2  | 35.2 | tetratricopeptide repeat domain 3                                                                                                                                                    | TTC3                                                               |
| 220024_s_at | 202.4  | 25.4   | 3704.4  | 12.4  | 35.2 | periaxin                                                                                                                                                                             | PRX                                                                |
| 204643_s_at | 168.2  | 37.5   | 838.5   | 13.6  | 35.2 | cytosolic ovarian carcinoma antigen 1                                                                                                                                                | COVA1                                                              |
| 213530_at   | 176.9  | 104.4  | 968.1   | 41    | 35.2 | RAB3 GTPase activating protein subunit 1 (catalytic)                                                                                                                                 | RAB3GAP1                                                           |
| 216286_at   | 135.2  | 15.4   | 784.3   | 5.9   | 35.2 | UDP-Gal:betaGlcNAc beta 1,4- galactosyltransferase, polypeptide 6                                                                                                                    | B4GALT6                                                            |
| 212641_at   | 243.9  | 104.7  | 1762.8  | 21.2  | 35.2 | human immunodeficiency virus type I enhancer binding protein 2                                                                                                                       | HIVP2                                                              |
| 214752_x_at | 448.9  | 347.9  | 3063.9  | 126.4 | 35.2 | filamin A, alpha (actin binding protein 280)                                                                                                                                         | FLNA                                                               |
| 206032_at   | 133.4  | 56     | 2028.8  | 4.8   | 35.2 | desmocollin 3                                                                                                                                                                        | DSC3                                                               |
| 213663_s_at | 23.4   | 8.2    | 259.6   | 1.8   | 35.2 | hypothetical LOC389275                                                                                                                                                               | LOC389275                                                          |
| 219211_at   | 152.2  | 33.4   | 1800.2  | 9.8   | 35.2 | ubiquitin specific peptidase 18                                                                                                                                                      | USP18                                                              |
| 213839_at   | 142    | 94.1   | 2828.6  | 11.4  | 35.2 | KIAA0500 protein                                                                                                                                                                     | KIAA0500                                                           |
| 208818_s_at | 1135.7 | 934.7  | 4507    | 488.8 | 34.8 | catechol-O-methyltransferase                                                                                                                                                         | COMT                                                               |
| 211434_s_at | 60.3   | 16.5   | 825.4   | 10.2  | 34.8 | chemokine (C-C motif) receptor-like 2                                                                                                                                                | CCRL2                                                              |
| 213715_s_at | 28     | 9.2    | 404.3   | 5.2   | 34.8 | ankyrin repeat domain 47                                                                                                                                                             | ANKRD47                                                            |
| 217542_at   | 143    | 9.9    | 1123.1  | 8.2   | 34.8 | Mdm2, transformed 3T3 cell double minute 2, p53 binding protein (mouse)                                                                                                              | MDM2                                                               |

|             |        |        |         |        |      |                                                                                                                                                                                |                                                     |
|-------------|--------|--------|---------|--------|------|--------------------------------------------------------------------------------------------------------------------------------------------------------------------------------|-----------------------------------------------------|
| 217753_s_at | 5938.3 | 4006.8 | 25428.5 | 2076.8 | 34.8 | ribosomal protein S26 /// 40S ribosomal protein S26-like<br>/// similar to 40S ribosomal protein S26                                                                           | RPS26 ///<br>RPS26L ///<br>LOC440440                |
| 204467_s_at | 171.2  | 51.3   | 13693.2 | 12.8   | 34.8 | synuclein, alpha (non A4 component of amyloid precursor) /// synuclein, alpha (non A4 component of amyloid precursor)                                                          | SNCA                                                |
| 204712_at   | 14.4   | 5.4    | 195.8   | 1.3    | 34.8 | WNT inhibitory factor 1                                                                                                                                                        | WIF1                                                |
| 213797_at   | 225.5  | 42.7   | 3486.1  | 14.5   | 34.8 | radical S-adenosyl methionine domain containing 2                                                                                                                              | RSAD2                                               |
| 218311_at   | 138.3  | 67.8   | 1156.1  | 19.2   | 34.8 | mitogen-activated protein kinase kinase kinase 3                                                                                                                               | MAP4K3                                              |
| 203063_at   | 576.5  | 303.1  | 3994.1  | 63.5   | 34.8 | protein phosphatase 1F (PP2C domain containing)                                                                                                                                | PPM1F                                               |
| 221221_s_at | 240.4  | 149    | 1298.1  | 18.7   | 34.8 | kelch-like 3 (Drosophila)                                                                                                                                                      | KLHL3                                               |
| 217110_s_at | 36.7   | 7.1    | 2577.8  | 1.9    | 34.8 | mucin 4, tracheobronchial                                                                                                                                                      | MUC4                                                |
| 201904_s_at | 39.3   | 16.3   | 1431.6  | 8.9    | 34.4 | CTD (carboxy-terminal domain, RNA polymerase II, polypeptide A) small phosphatase-like                                                                                         | CTDSPL                                              |
| 202017_at   | 94.7   | 21     | 750.8   | 12.3   | 34.4 | epoxide hydrolase 1, microsomal (xenobiotic)                                                                                                                                   | EPHX1                                               |
| 203964_at   | 1081   | 748.9  | 3821.7  | 503    | 34.4 | N-myc (and STAT) interactor                                                                                                                                                    | NMI                                                 |
| 207100_s_at | 251.9  | 14     | 2082.2  | 22.6   | 34.4 | vesicle-associated membrane protein 1 (synaptobrevin 1)                                                                                                                        | VAMP1                                               |
| 207413_s_at | 92.2   | 21.6   | 661.3   | 11.3   | 34.4 | sodium channel, voltage-gated, type V, alpha (long QT syndrome 3)                                                                                                              | SCN5A                                               |
| 207734_at   | 261.8  | 151    | 1265.9  | 82.4   | 34.4 | lymphocyte transmembrane adaptor 1                                                                                                                                             | LAX1                                                |
| 221274_s_at | 276.7  | 29     | 1206.4  | 24.3   | 34.4 | lectin, mannose-binding 2-like /// lectin, mannose-binding 2-like                                                                                                              | LMAN2L                                              |
| 208361_s_at | 180.4  | 65.5   | 728.9   | 18.9   | 34.4 | polymerase (RNA) III (DNA directed) polypeptide D, 44kDa                                                                                                                       | POLR3D                                              |
| 210972_x_at | 758.2  | 554.4  | 24206.5 | 214.3  | 34.4 | T cell receptor alpha locus /// T cell receptor delta variable 2 /// T cell receptor alpha variable 20 /// T cell receptor alpha joining 17 /// T cell receptor alpha constant | TRA@ /// TRDV2<br>/// TRAV20 ///<br>TRAJ17 /// TRAC |
| 204849_at   | 810.8  | 215    | 11702.5 | 5.4    | 34.4 | transcription factor-like 5 (basic helix-loop-helix)                                                                                                                           | TCFL5                                               |
| 206400_at   | 31.9   | 13.4   | 575.3   | 5      | 34.4 | lectin, galactoside-binding, soluble, 7 (galectin 7)                                                                                                                           | LGALS7                                              |
| 214667_s_at | 101.6  | 35     | 998     | 11.4   | 34.4 | tumor protein p53 inducible protein 11                                                                                                                                         | TP53I11                                             |
| 220532_s_at | 54.2   | 13.7   | 777.4   | 3.8    | 34.4 | LR8 protein                                                                                                                                                                    | LR8                                                 |
| 201616_s_at | 22.8   | 6.6    | 1425.1  | 2.1    | 34.4 | caldesmon 1                                                                                                                                                                    | CALD1                                               |
| 203910_at   | 179.7  | 83.8   | 10198.4 | 9.4    | 34.4 | Rho GTPase activating protein 29                                                                                                                                               | ARHGAP29                                            |
| 215761_at   | 164    | 112    | 967.7   | 19.1   | 34.4 | Dmx-like 2                                                                                                                                                                     | DMXL2                                               |
| 201579_at   | 158.1  | 58.3   | 5413.2  | 7.1    | 34.4 | FAT tumor suppressor homolog 1 (Drosophila)                                                                                                                                    | FAT                                                 |
| 212589_at   | 175.6  | 39.9   | 1058.4  | 5.8    | 34.4 | Sterol carrier protein 2                                                                                                                                                       | SCP2                                                |

|             |        |       |         |       |      |                                                                                                                                                                           |                     |
|-------------|--------|-------|---------|-------|------|---------------------------------------------------------------------------------------------------------------------------------------------------------------------------|---------------------|
| 210765_at   | 39.6   | 13.3  | 346.5   | 12.3  | 34.1 | CSE1 chromosome segregation 1-like (yeast)                                                                                                                                | CSE1L               |
| 214370_at   | 14.7   | 3.3   | 1290.2  | 3.3   | 34.1 | S100 calcium binding protein A8 (calgranulin A)                                                                                                                           | S100A8              |
| 221900_at   | 24.3   | 10.2  | 428.4   | 6.6   | 34.1 | collagen, type VIII, alpha 2                                                                                                                                              | COL8A2              |
| 203115_at   | 130.9  | 23.7  | 5913.7  | 11.8  | 34.1 | ferrochelatase (protoporphyrin)                                                                                                                                           | FECH                |
| 203335_at   | 364.4  | 171.5 | 12858.3 | 46.7  | 34.1 | phytanoyl-CoA hydroxylase (Refsum disease)                                                                                                                                | PHYH                |
| 212959_s_at | 740.4  | 459.9 | 6222    | 203   | 34.1 | N-acetylglucosamine-1-phosphate transferase, alpha and beta subunits                                                                                                      | GNPTAB              |
| 221182_at   | 23.5   | 5.1   | 327.6   | 1.8   | 34.1 | chromosome 1 open reading frame 129                                                                                                                                       | C1orf129            |
| 202565_s_at | 206.9  | 161   | 1008.3  | 92.6  | 33.7 | supervillin                                                                                                                                                               | SVIL                |
| 205538_at   | 53.5   | 15.2  | 482.7   | 10.8  | 33.7 | coronin, actin binding protein, 2A                                                                                                                                        | CORO2A              |
| 210904_s_at | 100.9  | 9.1   | 1814.7  | 17.2  | 33.7 | interleukin 13 receptor, alpha 1                                                                                                                                          | IL13RA1             |
| 214094_at   | 57.8   | 25.4  | 508.9   | 17.1  | 33.7 | far upstream element (FUSE) binding protein 1                                                                                                                             | FUBP1               |
| 216737_at   | 26     | 2.1   | 239.6   | 1.4   | 33.7 | CDNA: FLJ20872 fis, clone ADKA02604                                                                                                                                       | ---                 |
| 219668_at   | 38.9   | 16.6  | 450     | 8.5   | 33.7 | ganglioside-induced differentiation-associated protein 1-like 1                                                                                                           | GDAP1L1             |
| 202308_at   | 143    | 38    | 917.9   | 16.8  | 33.7 | sterol regulatory element binding transcription factor 1                                                                                                                  | SREBF1              |
| 205264_at   | 213.8  | 47.3  | 1503.1  | 17.1  | 33.7 | CD3E antigen, epsilon polypeptide associated protein                                                                                                                      | CD3EAP              |
| 207677_s_at | 947.3  | 692.2 | 4262.2  | 272.6 | 33.7 | neutrophil cytosolic factor 4, 40kDa /// neutrophil cytosolic factor 4, 40kDa                                                                                             | NCF4                |
| 208949_s_at | 310.6  | 81.7  | 38822.2 | 26    | 33.7 | lectin, galactoside-binding, soluble, 3 (galectin 3) /// galectin-3 internal gene                                                                                         | LGALS3 ///<br>GALIG |
| 206145_at   | 149.5  | 39.7  | 9642.4  | 9.1   | 33.7 | Rhesus blood group-associated glycoprotein                                                                                                                                | RHAG                |
| 209570_s_at | 74.1   | 28.9  | 1641.8  | 6     | 33.7 | DNA segment on chromosome 4 (unique) 234 expressed sequence                                                                                                               | D4S234E             |
| 212554_at   | 57.1   | 22.7  | 603.1   | 3.7   | 33.7 | CAP, adenylate cyclase-associated protein, 2 (yeast)                                                                                                                      | CAP2                |
| 206650_at   | 41.2   | 15.7  | 306.3   | 8.6   | 33.3 | IQ motif containing C                                                                                                                                                     | IQCC                |
| 219529_at   | 18.7   | 4.6   | 1679.1  | 3.4   | 33.3 | chloride intracellular channel 3                                                                                                                                          | CLIC3               |
| 211366_x_at | 813.4  | 586.8 | 4143.1  | 273.4 | 33.3 | caspase 1, apoptosis-related cysteine peptidase (interleukin 1, beta, convertase)                                                                                         | CASP1               |
| 215648_at   | 103.5  | 27.2  | 615.5   | 9.1   | 33.3 | ---                                                                                                                                                                       | ---                 |
| 202086_at   | 1340.7 | 562.8 | 24405.6 | 74.3  | 33.3 | myxovirus (influenza virus) resistance 1, interferon-inducible protein p78 (mouse) /// myxovirus (influenza virus) resistance 1, interferon-inducible protein p78 (mouse) | MX1                 |
| 205728_at   | 33.5   | 6.4   | 1607.1  | 2.1   | 33.3 | CDNA clone IMAGE:4811759                                                                                                                                                  | ---                 |
| 211902_x_at | 419.5  | 303.6 | 8249.5  | 116.8 | 33.3 | T cell receptor alpha locus                                                                                                                                               | TRA@                |
| 213764_s_at | 5.3    | 2.5   | 694.3   | 0.6   | 33.3 | microfibrillar associated protein 5                                                                                                                                       | MFAP5               |
| 211102_s_at | 251.5  | 164.5 | 1535.4  | 6.7   | 33.3 | leukocyte immunoglobulin-like receptor, subfamily A (with TM domain), member 2                                                                                            | LILRA2              |
| 205573_s_at | 53.1   | 8.9   | 1291.8  | 4.9   | 33.0 | sorting nexin 7                                                                                                                                                           | SNX7                |

|             |        |       |         |       |      |                                                                                                                 |                  |
|-------------|--------|-------|---------|-------|------|-----------------------------------------------------------------------------------------------------------------|------------------|
| 209407_s_at | 339.6  | 126.1 | 1400.4  | 139.1 | 33.0 | deformed epidermal autoregulatory factor 1 (Drosophila)                                                         | DEAF1            |
| 212264_s_at | 284.9  | 94.7  | 1688.2  | 55.8  | 33.0 | KIAA0261                                                                                                        | KIAA0261         |
| 214567_s_at | 14     | 5.7   | 436     | 5.5   | 33.0 | chemokine (C motif) ligand 1 /// chemokine (C motif) ligand 2                                                   | XCL1 /// XCL2    |
| 222216_s_at | 311.4  | 48.4  | 1334.9  | 51.3  | 33.0 | mitochondrial ribosomal protein L17                                                                             | MRPL17           |
| 203757_s_at | 220.7  | 22.3  | 7715.1  | 10.1  | 33.0 | carcinoembryonic antigen-related cell adhesion molecule 6 (non-specific cross reacting antigen)                 | CEACAM6          |
| 204039_at   | 129.9  | 49.4  | 2825.4  | 20.1  | 33.0 | CCAAT/enhancer binding protein (C/EBP), alpha                                                                   | CEBPA            |
| 220576_at   | 80.2   | 13.7  | 750.9   | 5.9   | 33.0 | GPI deacylase                                                                                                   | PGAP1            |
| 216747_at   | 70     | 20    | 562.1   | 9.1   | 33.0 | amyloid beta (A4) precursor protein-binding, family B, member 2 (Fe65-like)                                     | APBB2            |
| 202273_at   | 43.6   | 22.7  | 1188.9  | 9     | 33.0 | platelet-derived growth factor receptor, beta polypeptide                                                       | PDGFRB           |
| 203987_at   | 185.2  | 97.5  | 2062    | 29.6  | 33.0 | frizzled homolog 6 (Drosophila)                                                                                 | FZD6             |
| 216280_s_at | 47.4   | 17    | 349.9   | 3.5   | 33.0 | Dicer1, Dcr-1 homolog (Drosophila)                                                                              | DICER1           |
| 206831_s_at | 67.5   | 18.8  | 520.8   | 5.7   | 33.0 | arylsulfatase D                                                                                                 | ARSD             |
| 200096_s_at | 1044   | 670.1 | 3796    | 382.6 | 32.6 | ATPase, H+ transporting, lysosomal 9kDa, V0 subunit e /// ATPase, H+ transporting, lysosomal 9kDa, V0 subunit e | ATP6V0E          |
| 206067_s_at | 24.2   | 4.9   | 1338.9  | 4     | 32.6 | Wilms tumor 1                                                                                                   | WT1              |
| 208056_s_at | 1111.8 | 533.9 | 6352.1  | 315.6 | 32.6 | core-binding factor, runt domain, alpha subunit 2; translocated to, 3                                           | CBFA2T3          |
| 209288_s_at | 141.9  | 7.4   | 2379.5  | 6.1   | 32.6 | CDC42 effector protein (Rho GTPase binding) 3                                                                   | CDC42EP3         |
| 210915_x_at | 669.4  | 434.1 | 13605.2 | 260.8 | 32.6 | T cell receptor beta variable 19 /// T cell receptor beta constant 1                                            | TRBV19 /// TRBC1 |
| 217758_s_at | 636.8  | 342.6 | 3167.8  | 370.7 | 32.6 | SM-11044 binding protein                                                                                        | SMBP             |
| 219593_at   | 40.1   | 12.7  | 419.5   | 8.4   | 32.6 | solute carrier family 15, member 3                                                                              | SLC15A3          |
| 203428_s_at | 442.8  | 159.9 | 1857.4  | 70.3  | 32.6 | ASF1 anti-silencing function 1 homolog A (S. cerevisiae)                                                        | ASF1A            |
| 208908_s_at | 270.4  | 47.7  | 2051.6  | 23.8  | 32.6 | calpastatin                                                                                                     | CAST             |
| 218081_at   | 150.9  | 22.7  | 1249.2  | 6.8   | 32.6 | chromosome 20 open reading frame 27                                                                             | C20orf27         |
| 218660_at   | 151.5  | 37.7  | 2348.1  | 14.6  | 32.6 | dysferlin, limb girdle muscular dystrophy 2B (autosomal recessive)                                              | DYSF             |
| 219869_s_at | 393.7  | 317.3 | 2196.2  | 66.5  | 32.6 | solute carrier family 39 (zinc transporter), member 8                                                           | SLC39A8          |
| 213558_at   | 225.6  | 48.5  | 22160   | 12.8  | 32.6 | piccolo (presynaptic cytomatrix protein)                                                                        | PCLO             |
| 220121_at   | 77.8   | 17.7  | 503.4   | 6.6   | 32.6 | lines homolog 1 (Drosophila)                                                                                    | LINS1            |
| 65517_at    | 118.5  | 62.4  | 747     | 23.3  | 32.6 | adaptor-related protein complex 1, mu 2 subunit                                                                 | AP1M2            |
| 203450_at   | 161.7  | 73.9  | 561.9   | 19.6  | 32.6 | PKD2 interactor, golgi and endoplasmic reticulum associated 1                                                   | PGEA1            |

|             |        |       |         |       |      |                                                                                                                   |           |
|-------------|--------|-------|---------|-------|------|-------------------------------------------------------------------------------------------------------------------|-----------|
| 201849_at   | 125.2  | 45.5  | 920.7   | 9.2   | 32.6 | BCL2/adenovirus E1B 19kDa interacting protein 3                                                                   | BNIP3     |
| 211626_x_at | 395    | 173.7 | 1625.1  | 14.7  | 32.6 | v-ets erythroblastosis virus E26 oncogene like (avian) /// v-ets erythroblastosis virus E26 oncogene like (avian) | ERG       |
| 215382_x_at | 41.6   | 31.4  | 920.6   | 6.9   | 32.6 | tryptase alpha/beta 1                                                                                             | TPSAB1    |
| 214757_at   | 69.6   | 28.4  | 397.8   | 7.6   | 32.6 | CDNA clone IMAGE:3456494                                                                                          | ---       |
| 202718_at   | 113.1  | 58.5  | 4105.7  | 4.9   | 32.6 | insulin-like growth factor binding protein 2, 36kDa                                                               | IGFBP2    |
| 200979_at   | 323.9  | 250.3 | 1611.6  | 244.2 | 32.2 | Mitogen-activated protein kinase kinase kinase 15 /// CDNA FLJ34891 fis, clone NT2NE2017562                       | MAP3K15   |
| 203739_at   | 583.5  | 248.5 | 2923    | 270.5 | 32.2 | zinc finger protein 217                                                                                           | ZNF217    |
| 204411_at   | 64.1   | 24.9  | 654.9   | 17.7  | 32.2 | kinesin family member 21B                                                                                         | KIF21B    |
| 212814_at   | 250.7  | 121.8 | 1055.7  | 132.4 | 32.2 | KIAA0828 protein                                                                                                  | KIAA0828  |
| 212830_at   | 423.1  | 227.3 | 2842.1  | 199.4 | 32.2 | EGF-like-domain, multiple 5                                                                                       | EGFL5     |
| 217790_s_at | 58.1   | 9     | 507.9   | 6.5   | 32.2 | signal sequence receptor, gamma (translocon-associated protein gamma)                                             | SSR3      |
| 219684_at   | 196.8  | 23.5  | 1058.6  | 20.7  | 32.2 | 28kD interferon responsive protein                                                                                | IFRG28    |
| 221656_s_at | 90.5   | 15.2  | 619     | 7.6   | 32.2 | Rho guanine nucleotide exchange factor (GEF) 10-like                                                              | ARHGEF10L |
| 221757_at   | 465.1  | 292.9 | 3099.8  | 216.1 | 32.2 | HGFL gene /// HGFL gene                                                                                           | MGC17330  |
| 206127_at   | 356.6  | 70.3  | 1993.9  | 23.1  | 32.2 | ELK3, ETS-domain protein (SRF accessory protein 2)                                                                | ELK3      |
| 216026_s_at | 686    | 510.8 | 3365    | 21.1  | 32.2 | polymerase (DNA directed), epsilon                                                                                | POLE      |
| 220329_s_at | 127.5  | 83.2  | 656.2   | 19.9  | 32.2 | chromosome 6 open reading frame 96                                                                                | C6orf96   |
| 202887_s_at | 1419.6 | 658.6 | 11347.7 | 32.1  | 32.2 | DNA-damage-inducible transcript 4                                                                                 | DDIT4     |
| 207621_s_at | 159.4  | 62.9  | 2413.2  | 13.3  | 32.2 | phosphatidylethanolamine N-methyltransferase                                                                      | PEMT      |
| 209776_s_at | 31     | 19.7  | 397.5   | 5.2   | 32.2 | solute carrier family 19 (folate transporter), member 1                                                           | SLC19A1   |
| 204793_at   | 209.4  | 154.8 | 1899.3  | 12.8  | 32.2 | G protein-coupled receptor associated sorting protein 1                                                           | GPRASP1   |
| 204115_at   | 371.9  | 300.5 | 4663.6  | 3.3   | 32.2 | guanine nucleotide binding protein (G protein), gamma 11                                                          | GNG11     |
| 202948_at   | 47.7   | 6.3   | 591.8   | 3.8   | 31.9 | interleukin 1 receptor, type I                                                                                    | IL1R1     |
| 205885_s_at | 1000.2 | 455.9 | 5752.2  | 323.3 | 31.9 | integrin, alpha 4 (antigen CD49D, alpha 4 subunit of VLA-4 receptor)                                              | ITGA4     |
| 206359_at   | 21.1   | 7     | 299.7   | 7.2   | 31.9 | suppressor of cytokine signaling 3                                                                                | SOCS3     |
| 1438_at     | 111.7  | 31.1  | 746.6   | 15.3  | 31.9 | EPH receptor B3                                                                                                   | EPHB3     |
| 208637_x_at | 505.3  | 198.4 | 3743.8  | 95.3  | 31.9 | actinin, alpha 1                                                                                                  | ACTN1     |
| 209167_at   | 150.4  | 12.8  | 2836    | 5.8   | 31.9 | glycoprotein M6B                                                                                                  | GPM6B     |
| 211657_at   | 313.7  | 63.9  | 10789   | 22.5  | 31.9 | carcinoembryonic antigen-related cell adhesion molecule 6 (non-specific cross reacting antigen)                   | CEACAM6   |
| 210705_s_at | 189.1  | 119.2 | 849.2   | 12.6  | 31.9 | tripartite motif-containing 5                                                                                     | TRIM5     |
| 221529_s_at | 222    | 44.4  | 4666.8  | 13.3  | 31.9 | plasmalemma vesicle associated protein                                                                            | PLVAP     |
| 218806_s_at | 287.1  | 204.7 | 1924.9  | 23.3  | 31.9 | vav 3 oncogene                                                                                                    | VAV3      |

|             |        |        |         |       |      |                                                                                                                                          |                                  |
|-------------|--------|--------|---------|-------|------|------------------------------------------------------------------------------------------------------------------------------------------|----------------------------------|
| 202789_at   | 266.4  | 176.7  | 1223.4  | 20.9  | 31.9 | phospholipase C, gamma 1                                                                                                                 | PLCG1                            |
| 209170_s_at | 197.8  | 44.6   | 3675.7  | 4.5   | 31.9 | glycoprotein M6B                                                                                                                         | GPM6B                            |
| 203726_s_at | 56.5   | 18.7   | 2318.4  | 11.7  | 31.5 | laminin, alpha 3                                                                                                                         | LAMA3                            |
| 204006_s_at | 166.9  | 19.8   | 2149.5  | 10.6  | 31.5 | Fc fragment of IgG, low affinity IIIa, receptor (CD16a) ///<br>Fc fragment of IgG, low affinity IIIb, receptor (CD16b)                   | FCGR3A ///<br>FCGR3B             |
| 204232_at   | 313.8  | 222.3  | 4420.7  | 144.8 | 31.5 | Fc fragment of IgE, high affinity I, receptor for; gamma polypeptide                                                                     | FCER1G                           |
| 219120_at   | 180.4  | 15.2   | 667     | 26.2  | 31.5 | hypothetical protein FLJ21945                                                                                                            | FLJ21945                         |
| 219354_at   | 92.7   | 35.5   | 482.9   | 27.5  | 31.5 | hypothetical protein FLJ11078                                                                                                            | FLJ11078                         |
| 202888_s_at | 63.4   | 11.5   | 749.5   | 5.1   | 31.5 | alanyl (membrane) aminopeptidase (aminopeptidase N, aminopeptidase M, microsomal aminopeptidase, CD13, p150)                             | ANPEP                            |
| 203650_at   | 49.3   | 6.5    | 324.9   | 2.7   | 31.5 | protein C receptor, endothelial (EPCR)                                                                                                   | PROCR                            |
| 214353_at   | 50.1   | 16.6   | 321.3   | 8.2   | 31.5 | Cadherin, EGF LAG seven-pass G-type receptor 1 (flamingo homolog, Drosophila)                                                            | CELSR1                           |
| 212613_at   | 304.4  | 35     | 1511.8  | 8.7   | 31.5 | butyrophilin, subfamily 3, member A2                                                                                                     | BTN3A2                           |
| 206762_at   | 115.6  | 25.7   | 4277.4  | 9.9   | 31.5 | potassium voltage-gated channel, shaker-related subfamily, member 5                                                                      | KCNA5                            |
| 213218_at   | 166.7  | 123.6  | 656.9   | 19.5  | 31.5 | zinc finger protein 187                                                                                                                  | ZNF187                           |
| 218087_s_at | 47.4   | 9.3    | 1490.3  | 0.9   | 31.5 | sorbin and SH3 domain containing 1                                                                                                       | SORBS1                           |
| 204174_at   | 1237   | 842    | 13270.9 | 119   | 31.5 | arachidonate 5-lipoxygenase-activating protein                                                                                           | ALOX5AP                          |
| 217022_s_at | 1283.9 | 273.1  | 35058.2 | 6.6   | 31.5 | immunoglobulin heavy constant alpha 1 ///<br>immunoglobulin heavy constant alpha 2 (A2m marker) ///<br>hypothetical protein MGC27165     | IGHA1 /// IGH A2<br>/// MGC27165 |
| 203435_s_at | 3792.8 | 2101.1 | 15156.8 | 14.9  | 31.5 | membrane metallo-endopeptidase (neutral endopeptidase, enkephalinase, CALLA, CD10)                                                       | MME                              |
| 202219_at   | 30.5   | 13.8   | 7056.9  | 9.1   | 31.1 | solute carrier family 6 (neurotransmitter transporter, creatine), member 8                                                               | SLC6A8                           |
| 202809_s_at | 1265.5 | 710    | 7400.2  | 512   | 31.1 | chromosome 1 open reading frame 60                                                                                                       | C1orf60                          |
| 203476_at   | 140.1  | 8.3    | 3079.9  | 12.4  | 31.1 | trophoblast glycoprotein                                                                                                                 | TPBG                             |
| 203662_s_at | 44.7   | 19.3   | 3171.4  | 12.3  | 31.1 | tropomodulin 1                                                                                                                           | TMOD1                            |
| 213294_at   | 660.6  | 489.1  | 4962.7  | 346.1 | 31.1 | Coiled-coil domain containing 75                                                                                                         | CCDC75                           |
| 209474_s_at | 59.7   | 14.6   | 449.6   | 6.8   | 31.1 | ectonucleoside triphosphate diphosphohydrolase 1                                                                                         | ENTPD1                           |
| 211462_s_at | 75.1   | 13.4   | 784.2   | 4.4   | 31.1 | transducin (beta)-like 1Y-linked                                                                                                         | TBL1Y                            |
| 214277_at   | 21.5   | 2      | 356.2   | 0.5   | 31.1 | COX11 homolog, cytochrome c oxidase assembly protein (yeast) /// COX11 homolog, cytochrome c oxidase assembly protein (yeast) pseudogene | COX11 ///<br>COX11P              |
| 217264_s_at | 72.4   | 31.9   | 487.4   | 9.2   | 31.1 | sodium channel, nonvoltage-gated 1 alpha                                                                                                 | SCNN1A                           |
| 214110_s_at | 28.3   | 16.8   | 809.3   | 6.8   | 31.1 | Similar to lymphocyte-specific protein 1                                                                                                 | LOC440886                        |

|             |        |        |         |        |      |                                                                                 |          |
|-------------|--------|--------|---------|--------|------|---------------------------------------------------------------------------------|----------|
| 202125_s_at | 447.1  | 312.2  | 8793.8  | 278.3  | 30.7 | amyotrophic lateral sclerosis 2 (juvenile) chromosome region, candidate 3       | ALS2CR3  |
| 203972_s_at | 257.9  | 191.8  | 834.8   | 107.8  | 30.7 | peroxisomal biogenesis factor 3                                                 | PEX3     |
| 204655_at   | 243.8  | 157.3  | 2562.6  | 116.7  | 30.7 | chemokine (C-C motif) ligand 5 /// chemokine (C-C motif) ligand 5               | CCL5     |
| 205565_s_at | 178.6  | 49.2   | 911.6   | 28.9   | 30.7 | frataxin                                                                        | FXN      |
| 206135_at   | 9.3    | 4.6    | 1153    | 2.3    | 30.7 | suppression of tumorigenicity 18 (breast carcinoma) (zinc finger protein)       | ST18     |
| 206488_s_at | 109.2  | 11.5   | 6444.4  | 9.5    | 30.7 | CD36 antigen (collagen type I receptor, thrombospondin receptor)                | CD36     |
| 210451_at   | 23.3   | 9.8    | 1635.2  | 7.6    | 30.7 | pyruvate kinase, liver and RBC                                                  | PKLR     |
| 210703_at   | 51.1   | 8.6    | 287.8   | 8.2    | 30.7 | ---                                                                             | ---      |
| 212647_at   | 42.7   | 16.4   | 523.9   | 10.9   | 30.7 | related RAS viral (r-ras) oncogene homolog                                      | RRAS     |
| 213964_x_at | 23.1   | 2.6    | 511.9   | 2.7    | 30.7 | Chromosome 10 open reading frame 95                                             | C10orf95 |
| 219360_s_at | 13     | 7.5    | 2377.6  | 5.6    | 30.7 | transient receptor potential cation channel, subfamily M, member 4              | TRPM4    |
| 221484_at   | 431    | 310.7  | 4031.7  | 189    | 30.7 | UDP-Gal:betaGlcNAc beta 1,4- galactosyltransferase, polypeptide 5               | B4GALT5  |
| 222084_s_at | 9.9    | 5.6    | 249.1   | 3.7    | 30.7 | SET binding factor 1                                                            | SBF1     |
| 205926_at   | 294.3  | 150.8  | 1725.2  | 62.9   | 30.7 | interleukin 27 receptor, alpha                                                  | IL27RA   |
| 206304_at   | 51.8   | 24.1   | 1450.1  | 8.8    | 30.7 | myosin binding protein H                                                        | MYBPH    |
| 210683_at   | 5.9    | 1.7    | 332.1   | 0.6    | 30.7 | neurturin                                                                       | NRTN     |
| 215650_at   | 92.7   | 20.3   | 695.3   | 8.3    | 30.7 | ---                                                                             | ---      |
| 217147_s_at | 63.7   | 6      | 1595.6  | 2.4    | 30.7 | T cell receptor associated transmembrane adaptor 1                              | TRAT1    |
| 202456_s_at | 40.8   | 21     | 1242.7  | 9.6    | 30.7 | zyg-11 homolog B (C. elegans)-like                                              | ZYG11BL  |
| 213012_at   | 202.8  | 116    | 771.6   | 36.3   | 30.7 | neural precursor cell expressed, developmentally down-regulated 4               | NEDD4    |
| 207513_s_at | 241.5  | 181.8  | 833.3   | 84.5   | 30.7 | zinc finger protein 189                                                         | ZNF189   |
| 204620_s_at | 208.6  | 169.4  | 12708.4 | 18.5   | 30.7 | chondroitin sulfate proteoglycan 2 (versican)                                   | CSPG2    |
| 211574_s_at | 383.8  | 195.8  | 1584.4  | 46.6   | 30.7 | membrane cofactor protein (CD46, trophoblast-lymphocyte cross-reactive antigen) | MCP      |
| 219683_at   | 56.8   | 24.9   | 707.8   | 2.2    | 30.7 | frizzled homolog 3 (Drosophila)                                                 | FZD3     |
| 213005_s_at | 177.3  | 116.5  | 6672.7  | 8.4    | 30.7 | ankyrin repeat domain 15                                                        | ANKRD15  |
| 218468_s_at | 105.2  | 33.7   | 4564    | 4.3    | 30.7 | gremlin 1, cysteine knot superfamily, homolog (Xenopus laevis)                  | GREM1    |
| 222154_s_at | 275.4  | 128.6  | 13569   | 12.1   | 30.7 | DNA polymerase-transactivated protein 6                                         | DNAPT6   |
| 210663_s_at | 44.4   | 15.8   | 1257.6  | 8.7    | 30.4 | kynureninase (L-kynurenine hydrolase)                                           | KYNU     |
| 211600_at   | 5593.8 | 3335.9 | 31276.5 | 2421.9 | 30.4 | ---                                                                             | ---      |
| 212216_at   | 212.7  | 31.6   | 957.9   | 23.4   | 30.4 | prolyl endopeptidase-like                                                       | PREPL    |
| 212848_s_at | 64.8   | 19.9   | 2991.1  | 11.2   | 30.4 | chromosome 9 open reading frame 3                                               | C9orf3   |



|             |       |       |        |       |      |                                                                     |          |
|-------------|-------|-------|--------|-------|------|---------------------------------------------------------------------|----------|
| 213800_at   | 24.7  | 7.3   | 326.6  | 6     | 30.4 | complement factor H                                                 | CFH      |
| 219540_at   | 137.6 | 17.3  | 531.1  | 11.2  | 30.4 | zinc finger protein 267                                             | ZNF267   |
| 203471_s_at | 454.6 | 222.9 | 2688   | 73.5  | 30.4 | pleckstrin                                                          | PLEK     |
| 204548_at   | 21.1  | 13.4  | 813.5  | 6.4   | 30.4 | steroidogenic acute regulator                                       | STAR     |
| 215064_at   | 76.1  | 17.5  | 473.1  | 8.3   | 30.4 | Sterol-C5-desaturase (ERG3 delta-5-desaturase homolog, fungal)-like | SC5DL    |
| 204439_at   | 215.3 | 10    | 10754  | 4.7   | 30.4 | interferon-induced protein 44-like                                  | IFI44L   |
| 210975_x_at | 181.1 | 69.3  | 824.9  | 28.2  | 30.4 | Fas-activated serine/threonine kinase                               | FASTK    |
| 213698_at   | 489.6 | 393.5 | 1567.9 | 83.7  | 30.4 | zinc finger, MYM-type 6                                             | ZMYM6    |
| 218469_at   | 139   | 97.9  | 4088.8 | 7.9   | 30.4 | gremlin 1, cysteine knot superfamily, homolog (Xenopus laevis)      | GREM1    |
| 201655_s_at | 49.3  | 8.6   | 641.1  | 6.8   | 30.0 | heparan sulfate proteoglycan 2 (perlecan)                           | HSPG2    |
| 210074_at   | 63.6  | 7.6   | 303.9  | 8.1   | 30.0 | cathepsin L2                                                        | CTSL2    |
| 212466_at   | 26.2  | 5.6   | 657.5  | 4     | 30.0 | sprouty-related, EVH1 domain containing 2                           | SPRED2   |
| 213521_at   | 776.2 | 547.8 | 4117   | 383.4 | 30.0 | Protein tyrosine phosphatase, non-receptor type 18 (brain-derived)  | PTPN18   |
| 218229_s_at | 435   | 234.6 | 2198.6 | 176.2 | 30.0 | pogo transposable element with KRAB domain                          | POGK     |
| 209663_s_at | 23.6  | 14.4  | 324.8  | 6.9   | 30.0 | integrin, alpha 7                                                   | ITGA7    |
| 219731_at   | 317.6 | 207.2 | 1712.3 | 61.6  | 30.0 | weakly similar to zinc finger protein 195                           | FLJ34077 |
| 221195_at   | 36    | 8.2   | 262.1  | 3.5   | 30.0 | PTD016 protein                                                      | LOC51136 |
| 204276_at   | 105.8 | 23.9  | 706.7  | 6.8   | 30.0 | thymidine kinase 2, mitochondrial                                   | TK2      |
| 206090_s_at | 176.7 | 107.4 | 666.5  | 50.4  | 30.0 | disrupted in schizophrenia 1                                        | DISC1    |
| 206618_at   | 45    | 13.6  | 282.2  | 5.2   | 30.0 | interleukin 18 receptor 1                                           | IL18R1   |
| 214666_x_at | 123.3 | 45.9  | 565.4  | 9.5   | 30.0 | iron-responsive element binding protein 2                           | IREB2    |
| 204821_at   | 222.6 | 133.8 | 1084.6 | 32    | 30.0 | butyrophilin, subfamily 3, member A3                                | BTN3A3   |
| 47560_at    | 204.3 | 86    | 991.2  | 25.8  | 30.0 | latrophilin 1                                                       | LPHN1    |
| 209356_x_at | 118   | 25.8  | 815.1  | 10.6  | 30.0 | EGF-containing fibulin-like extracellular matrix protein 2          | EFEMP2   |
| 216167_at   | 18.5  | 8.4   | 225.8  | 2.6   | 30.0 | leucine rich repeat neuronal 5                                      | LRRN5    |
| 32402_s_at  | 85.9  | 53.2  | 334.4  | 16.9  | 30.0 | symplekin                                                           | SYMPK    |
| 213355_at   | 116.3 | 14.9  | 832.8  | 4.9   | 30.0 | ST3 beta-galactoside alpha-2,3-sialyltransferase 6                  | ST3GAL6  |
| 37986_at    | 105.5 | 41.3  | 1787.6 | 5.1   | 30.0 | erythropoietin receptor                                             | EPOR     |
| 200994_at   | 616.5 | 375   | 2982.3 | 255.3 | 29.6 | Importin 7                                                          | IPO7     |
| 202265_at   | 590.9 | 220.6 | 8430.4 | 244.1 | 29.6 | polycomb group ring finger 4                                        | PCGF4    |
| 211917_s_at | 63.6  | 5.6   | 415.6  | 5.7   | 29.6 | prolactin receptor /// prolactin receptor                           | PRLR     |
| 219470_x_at | 154.2 | 87.6  | 1374.8 | 53.1  | 29.6 | cyclin J                                                            | CCNJ     |
| 220676_at   | 52.2  | 7.7   | 313    | 4.8   | 29.6 | ADAM metallopeptidase with thrombospondin type 1 motif, 8           | ADAMTS8  |
| 200859_x_at | 686.3 | 476.2 | 4868.3 | 194.6 | 29.6 | filamin A, alpha (actin binding protein 280)                        | FLNA     |

|             |        |        |         |       |      |                                                                                                                                                                                                             |               |
|-------------|--------|--------|---------|-------|------|-------------------------------------------------------------------------------------------------------------------------------------------------------------------------------------------------------------|---------------|
| 200887_s_at | 1051.4 | 588.9  | 8128.3  | 154.8 | 29.6 | signal transducer and activator of transcription 1, 91kDa                                                                                                                                                   | STAT1         |
| 204150_at   | 216.4  | 53     | 10597.1 | 14.1  | 29.6 | stabilin 1                                                                                                                                                                                                  | STAB1         |
| 220396_at   | 197.7  | 48.5   | 1749.4  | 19.2  | 29.6 | ---                                                                                                                                                                                                         | ---           |
| 221042_s_at | 100.7  | 16     | 1322    | 7.4   | 29.6 | calmin (calponin-like, transmembrane)                                                                                                                                                                       | CLMN          |
| 218686_s_at | 54.6   | 49.1   | 1557.5  | 19.7  | 29.6 | rhomoid family 1 (Drosophila)                                                                                                                                                                               | RHBDF1        |
| 206682_at   | 78.9   | 23.6   | 445.7   | 6.2   | 29.6 | C-type lectin domain family 10, member A                                                                                                                                                                    | CLEC10A       |
| 208273_at   | 128.8  | 65.6   | 524.1   | 11.5  | 29.6 | zinc finger protein 695                                                                                                                                                                                     | ZNF695        |
| 208614_s_at | 514.9  | 365.6  | 5706.7  | 64.1  | 29.6 | filamin B, beta (actin binding protein 278)                                                                                                                                                                 | FLNB          |
| 214735_at   | 167.4  | 65.5   | 2571    | 7     | 29.6 | phosphoinositide-binding protein PIP3-E                                                                                                                                                                     | PIP3-E        |
| 200659_s_at | 472.5  | 151.4  | 4886.9  | 87    | 29.3 | prohibitin                                                                                                                                                                                                  | PHB           |
| 215222_x_at | 1112.1 | 652.9  | 4103.4  | 671.1 | 29.3 | microtubule-actin crosslinking factor 1                                                                                                                                                                     | MACF1         |
| 203043_at   | 851.8  | 563    | 4757.6  | 206.9 | 29.3 | zinc finger, BED-type containing 1                                                                                                                                                                          | ZBED1         |
| 212739_s_at | 663    | 261.3  | 3017    | 109.5 | 29.3 | non-metastatic cells 4, protein expressed in                                                                                                                                                                | NME4          |
| 219767_s_at | 305.3  | 259.4  | 1419.8  | 86.3  | 29.3 | crystallin, zeta (quinone reductase)-like 1                                                                                                                                                                 | CRYZL1        |
| 209671_x_at | 641.5  | 291.3  | 22825.7 | 60.1  | 29.3 | T cell receptor alpha locus /// T cell receptor alpha locus<br>/// T cell receptor alpha constant /// T cell receptor alpha constant                                                                        | TRA@ /// TRAC |
| 211597_s_at | 176.8  | 29.1   | 5111.3  | 8.3   | 29.3 | homeodomain-only protein /// homeodomain-only protein                                                                                                                                                       | HOP           |
| 221370_at   | 108.6  | 41.1   | 551.4   | 16.6  | 29.3 | kruppel-like zinc finger factor X17                                                                                                                                                                         | LOC377064     |
| 221641_s_at | 343.8  | 229.3  | 2829.3  | 42.4  | 29.3 | acyl-CoA thioesterase 9                                                                                                                                                                                     | ACOT9         |
| 212976_at   | 27.3   | 12     | 286.2   | 1.8   | 29.3 | leucine rich repeat containing 8 family, member B                                                                                                                                                           | LRR8B         |
| 207190_at   | 29.8   | 24.9   | 782.1   | 6.4   | 29.3 | zinc finger, ZZ-type with EF-hand domain 1                                                                                                                                                                  | ZZEF1         |
| 203434_s_at | 3344.3 | 2134.2 | 13818.9 | 3.4   | 29.3 | membrane metallo-endopeptidase (neutral endopeptidase, enkephalinase, CALLA, CD10)                                                                                                                          | MME           |
| 206940_s_at | 811.4  | 463.5  | 11867.2 | 33.2  | 29.3 | POU domain, class 4, transcription factor 1                                                                                                                                                                 | POU4F1        |
| 208454_s_at | 166.5  | 23     | 1452.4  | 18.8  | 28.9 | plasma glutamate carboxypeptidase                                                                                                                                                                           | PGCP          |
| 211372_s_at | 30.8   | 11.7   | 750.5   | 6.1   | 28.9 | interleukin 1 receptor, type II                                                                                                                                                                             | IL1R2         |
| 211743_s_at | 96.8   | 14.7   | 29321.7 | 12.2  | 28.9 | proteoglycan 2, bone marrow (natural killer cell activator, eosinophil granule major basic protein) /// proteoglycan 2, bone marrow (natural killer cell activator, eosinophil granule major basic protein) | PRG2          |
| 216037_x_at | 368.2  | 206.5  | 1613    | 120.8 | 28.9 | transcription factor 7-like 2 (T-cell specific, HMG-box)                                                                                                                                                    | TCF7L2        |
| 218921_at   | 227.6  | 40.7   | 1358.9  | 53.8  | 28.9 | single immunoglobulin and toll-interleukin 1 receptor (TIR) domain                                                                                                                                          | SIGIRR        |
| 38487_at    | 289.4  | 82.3   | 13184.4 | 50.7  | 28.9 | stabilin 1                                                                                                                                                                                                  | STAB1         |
| 200813_s_at | 666.6  | 416.6  | 2386    | 63.5  | 28.9 | platelet-activating factor acetylhydrolase, isoform Ib, alpha subunit 45kDa                                                                                                                                 | PAFAH1B1      |
| 219864_s_at | 22.3   | 4.3    | 294.6   | 2     | 28.9 | Down syndrome critical region gene 1-like 2                                                                                                                                                                 | DSCR1L2       |

|             |        |        |         |       |      |                                                                                                              |                           |
|-------------|--------|--------|---------|-------|------|--------------------------------------------------------------------------------------------------------------|---------------------------|
| 208680_at   | 8265.5 | 6447.7 | 43425.5 | 1422  | 28.9 | peroxiredoxin 1                                                                                              | PRDX1                     |
| 219451_at   | 178.6  | 31     | 1373.2  | 5.9   | 28.9 | methionine sulfoxide reductase B2                                                                            | MSRB2                     |
| 204007_at   | 195.7  | 116.9  | 1789.5  | 26.7  | 28.9 | Fc fragment of IgG, low affinity IIIb, receptor (CD16b)                                                      | FCGR3B                    |
| 216333_x_at | 53     | 28.1   | 1476.8  | 6.4   | 28.9 | tenascin XB                                                                                                  | TNXB                      |
| 215442_s_at | 12     | 4.8    | 444.7   | 1.5   | 28.9 | thyroid stimulating hormone receptor                                                                         | TSHR                      |
| 202838_at   | 653.7  | 432.9  | 3736.2  | 70.3  | 28.9 | fucosidase, alpha-L- 1, tissue                                                                               | FUCA1                     |
| 204505_s_at | 315.2  | 265.2  | 13524   | 32.7  | 28.9 | erythrocyte membrane protein band 4.9 (dematin)                                                              | EPB49                     |
| 221912_s_at | 199.3  | 117.4  | 734.2   | 19.8  | 28.9 | coiled-coil domain containing 28B                                                                            | CCDC28B                   |
| 219564_at   | 103.3  | 17.6   | 1219.7  | 8.8   | 28.5 | potassium inwardly-rectifying channel, subfamily J, member 16                                                | KCNJ16                    |
| 204482_at   | 26.5   | 16.4   | 433.9   | 7.7   | 28.5 | claudin 5 (transmembrane protein deleted in velocardiofacial syndrome)                                       | CLDN5                     |
| 212486_s_at | 139.3  | 14.3   | 766.1   | 4.1   | 28.5 | FYN oncogene related to SRC, FGR, YES                                                                        | FYN                       |
| 215646_s_at | 42.5   | 5.4    | 6886.2  | 2.5   | 28.5 | chondroitin sulfate proteoglycan 2 (versican) ///<br>chondroitin sulfate proteoglycan 2 (versican)           | CSPG2                     |
| 216833_x_at | 278.3  | 162.2  | 23091.1 | 19.7  | 28.5 | glycophorin B (includes Ss blood group) /// glycophorin E                                                    | GYPB /// GYPE             |
| 214945_at   | 97.6   | 72.1   | 821.6   | 4.1   | 28.5 | NY-REN-7 antigen /// similar to KIAA0752 protein                                                             | NY-REN-7 ///<br>LOC389347 |
| 202877_s_at | 193.8  | 23.9   | 1033    | 19.1  | 28.1 | complement component 1, q subcomponent, receptor 1<br>/// complement component 1, q subcomponent, receptor 1 | C1QR1                     |
| 210340_s_at | 34     | 4.5    | 280.4   | 3.5   | 28.1 | colony stimulating factor 2 receptor, alpha, low-affinity (granulocyte-macrophage)                           | CSF2RA                    |
| 221059_s_at | 276.9  | 165.1  | 3040.2  | 105.5 | 28.1 | coactosin-like 1 (Dictyostelium)                                                                             | COTL1                     |
| 203482_at   | 349.4  | 302.5  | 1426.7  | 139.9 | 28.1 | chromosome 10 open reading frame 6                                                                           | C10orf6                   |
| 206023_at   | 13.1   | 6.9    | 366.1   | 3.4   | 28.1 | neuromedin U                                                                                                 | NMU                       |
| 43511_s_at  | 419    | 243.3  | 1829    | 96.1  | 28.1 | MRNA; cDNA DKFZp762M127 (from clone DKFZp762M127)                                                            | ---                       |
| 204689_at   | 917.2  | 831.8  | 4085.4  | 104.7 | 28.1 | hematopoietically expressed homeobox                                                                         | HHEX                      |
| 213385_at   | 150.6  | 28.5   | 2256.5  | 8     | 28.1 | Chimerin (chimaerin) 2                                                                                       | CHN2                      |
| 201911_s_at | 120.3  | 20     | 853.8   | 6.4   | 28.1 | FERM, RhoGEF (ARHGEF) and pleckstrin domain protein 1 (chondrocyte-derived)                                  | FARP1                     |
| 213856_at   | 84.7   | 15.7   | 403.4   | 5.1   | 28.1 | CD47 antigen (Rh-related antigen, integrin-associated signal transducer)                                     | CD47                      |
| 213953_at   | 49.5   | 15.7   | 693.1   | 3.2   | 28.1 | keratin 20                                                                                                   | KRT20                     |
| 203139_at   | 746    | 321.6  | 4394    | 102.3 | 28.1 | death-associated protein kinase 1                                                                            | DAPK1                     |
| 213451_x_at | 52     | 41.4   | 1626    | 9     | 28.1 | tenascin XB                                                                                                  | TNXB                      |
| 220530_at   | 49.1   | 17.1   | 414.9   | 3.7   | 28.1 | ---                                                                                                          | ---                       |

|             |        |        |         |        |      |                                                                         |           |
|-------------|--------|--------|---------|--------|------|-------------------------------------------------------------------------|-----------|
| 220952_s_at | 168    | 141.6  | 1240.3  | 6      | 28.1 | pleckstrin homology domain containing, family A member 5                | PLEKHA5   |
| 202671_s_at | 203.5  | 102.2  | 2003.4  | 5.7    | 28.1 | pyridoxal (pyridoxine, vitamin B6) kinase                               | PDXK      |
| 202665_s_at | 835.1  | 582.7  | 3306.9  | 384.7  | 27.8 | Wiskott-Aldrich syndrome protein interacting protein                    | WASPIP    |
| 204866_at   | 211.5  | 75.7   | 1149.8  | 72.8   | 27.8 | PHD finger protein 16                                                   | PHF16     |
| 207063_at   | 34.8   | 6.4    | 444.4   | 3.7    | 27.8 | chromosome Y open reading frame 14                                      | CYorf14   |
| 207605_x_at | 713.7  | 490.7  | 3210.3  | 279.1  | 27.8 | zinc finger protein 117 (HPF9)                                          | ZNF117    |
| 208805_at   | 6471.6 | 4957.8 | 25767.4 | 2603.4 | 27.8 | proteasome (prosome, macropain) subunit, alpha type, 6                  | PSMA6     |
| 209135_at   | 56.4   | 3      | 536.8   | 2.4    | 27.8 | aspartate beta-hydroxylase                                              | ASPH      |
| 213696_s_at | 144.5  | 47.7   | 666.6   | 30.8   | 27.8 | mediator of RNA polymerase II transcription, subunit 8 homolog (yeast)  | MED8      |
| 216071_x_at | 702.9  | 347    | 2780    | 381.2  | 27.8 | mediator of RNA polymerase II transcription, subunit 12 homolog (yeast) | MED12     |
| 218181_s_at | 372    | 256.6  | 1267    | 170.4  | 27.8 | mitogen-activated protein kinase kinase kinase kinase 4                 | MAP4K4    |
| 218781_at   | 767.9  | 476.7  | 4153.5  | 332.5  | 27.8 | SMC6 structural maintenance of chromosomes 6-like 1 (yeast)             | SMC6L1    |
| 220582_at   | 100.2  | 14.2   | 522.5   | 9.2    | 27.8 | ---                                                                     | ---       |
| 202018_s_at | 36.7   | 13.7   | 38822.7 | 5.7    | 27.8 | lactotransferrin                                                        | LTF       |
| 201162_at   | 751    | 32.6   | 11849.6 | 15.7   | 27.8 | insulin-like growth factor binding protein 7                            | IGFBP7    |
| 207802_at   | 10.5   | 4.1    | 4963.3  | 0.9    | 27.8 | cysteine-rich secretory protein 3                                       | CRISP3    |
| 220798_x_at | 85.6   | 13.9   | 721.7   | 4.1    | 27.8 | plasticity-related gene 2                                               | PRG2      |
| 203411_s_at | 190.1  | 23.1   | 2250.7  | 8.1    | 27.8 | lamin A/C                                                               | LMNA      |
| 208862_s_at | 248.5  | 93.1   | 1480.8  | 35.8   | 27.8 | catenin (cadherin-associated protein), delta 1                          | CTNND1    |
| 217257_at   | 37.2   | 4.5    | 228.7   | 1.9    | 27.8 | Stathmin 1/oncoprotein 18                                               | STMN1     |
| 221352_at   | 80.5   | 23.1   | 489.8   | 8.4    | 27.8 | DNA binding protein for surfactant protein B                            | HUMBINDC  |
| 201701_s_at | 152.7  | 104.7  | 748.9   | 9.5    | 27.8 | progesterone receptor membrane component 2                              | PGRMC2    |
| 218141_at   | 151    | 82.4   | 5427.4  | 15.3   | 27.8 | likely ortholog of mouse ubiquitin-conjugating enzyme E2-230K           | E2-230K   |
| 201188_s_at | 243.2  | 136.8  | 1625    | 29.1   | 27.8 | inositol 1,4,5-triphosphate receptor, type 3                            | ITPR3     |
| 208405_s_at | 2539.4 | 1613.7 | 19923.7 | 888.6  | 27.4 | CD164 antigen, sialomucin                                               | CD164     |
| 211819_s_at | 95     | 5      | 1000    | 3.4    | 27.4 | sorbin and SH3 domain containing 1                                      | SORBS1    |
| 213556_at   | 105    | 10.3   | 946.4   | 7.8    | 27.4 | similar to R28379_1                                                     | LOC390940 |
| 208033_s_at | 95.8   | 15.5   | 1150.3  | 6.3    | 27.4 | AT-binding transcription factor 1                                       | ATBF1     |
| 209272_at   | 284.7  | 193.5  | 1317.9  | 33.7   | 27.4 | NGFI-A binding protein 1 (EGR1 binding protein 1)                       | NAB1      |
| 209604_s_at | 296.1  | 106.9  | 5495.4  | 27.4   | 27.4 | GATA binding protein 3                                                  | GATA3     |
| 220010_at   | 30.8   | 7.5    | 4146.7  | 3.3    | 27.4 | KCNE1-like                                                              | KCNE1L    |
| 218017_s_at | 210.9  | 40.1   | 1100.6  | 19.4   | 27.4 | transmembrane protein 76                                                | TMEM76    |

|             |        |        |         |        |      |                                                                                                                   |                    |
|-------------|--------|--------|---------|--------|------|-------------------------------------------------------------------------------------------------------------------|--------------------|
| 203398_s_at | 72.1   | 24.1   | 553.6   | 6.4    | 27.4 | UDP-N-acetyl-alpha-D-galactosamine:polypeptide N-acetylgalactosaminyltransferase 3 (GalNAc-T3)                    | GALNT3             |
| 203577_at   | 89.1   | 17.9   | 472.5   | 5.5    | 27.4 | general transcription factor IIH, polypeptide 4, 52kDa                                                            | GTF2H4             |
| 220252_x_at | 399.1  | 132.7  | 2976.4  | 33.6   | 27.4 | chromosome X open reading frame 21                                                                                | CXorf21            |
| 204882_at   | 679.5  | 332.4  | 3947.9  | 30.2   | 27.4 | Rho GTPase activating protein 25                                                                                  | ARHGAP25           |
| 205557_at   | 40.4   | 29.5   | 14658   | 6.3    | 27.4 | bactericidal/permeability-increasing protein                                                                      | BPI                |
| 202966_at   | 51.1   | 20.6   | 440.5   | 3      | 27.4 | calpain 6                                                                                                         | CAPN6              |
| 206761_at   | 182.3  | 81.9   | 2348    | 11.1   | 27.4 | CD96 antigen                                                                                                      | CD96               |
| 200931_s_at | 1317.9 | 900.8  | 6524.3  | 471.1  | 27.0 | vinculin                                                                                                          | VCL                |
| 203469_s_at | 47.2   | 16.6   | 512.7   | 11.4   | 27.0 | cyclin-dependent kinase (CDC2-like) 10                                                                            | CDK10              |
| 205987_at   | 249.7  | 16     | 7020.6  | 9.7    | 27.0 | CD1C antigen, c polypeptide                                                                                       | CD1C               |
| 207668_x_at | 2269.9 | 1931.1 | 10249.1 | 1036.8 | 27.0 | protein disulfide isomerase family A, member 6                                                                    | PDIA6              |
| 208167_s_at | 54.3   | 6.5    | 1014.3  | 4.6    | 27.0 | matrix metalloproteinase 16 (membrane-inserted)                                                                   | MMP16              |
| 216672_s_at | 12.4   | 6.2    | 212.7   | 4.2    | 27.0 | myelin transcription factor 1-like                                                                                | MYT1L              |
| 218275_at   | 99.3   | 19.2   | 384     | 10.7   | 27.0 | solute carrier family 25 (mitochondrial carrier; dicarboxylate transporter), member 10                            | SLC25A10           |
| 202169_s_at | 601.6  | 377.7  | 1966.2  | 166.7  | 27.0 | aminoadipate-semialdehyde dehydrogenase-phosphopantetheinyl transferase                                           | AASDHPPT           |
| 204846_at   | 70.3   | 15.1   | 733.6   | 6.7    | 27.0 | ceruloplasmin (ferroxidase)                                                                                       | CP                 |
| 212623_at   | 414.1  | 261    | 1305.9  | 112.5  | 27.0 | transmembrane protein 41B                                                                                         | TMEM41B            |
| 214582_at   | 252.1  | 143.6  | 1684.1  | 43.7   | 27.0 | phosphodiesterase 3B, cGMP-inhibited                                                                              | PDE3B              |
| 220030_at   | 20.9   | 3.5    | 364.3   | 1.5    | 27.0 | serine/threonine/tyrosine kinase 1                                                                                | STYK1              |
| 218454_at   | 207.2  | 52.4   | 12684.2 | 21.7   | 27.0 | hypothetical protein FLJ22662                                                                                     | FLJ22662           |
| 219467_at   | 181.6  | 129.5  | 614.8   | 36.9   | 27.0 | hypothetical protein FLJ20125                                                                                     | FLJ20125           |
| 209122_at   | 542.2  | 267.6  | 8508.3  | 60.5   | 27.0 | adipose differentiation-related protein                                                                           | ADFP               |
| 218019_s_at | 483.5  | 320.9  | 4313.3  | 154.2  | 27.0 | pyridoxal (pyridoxine, vitamin B6) kinase                                                                         | PDXK               |
| 216174_at   | 178.7  | 87.5   | 794.2   | 18.1   | 27.0 | hepatocellular carcinoma-related HCRP1                                                                            | HCRP1              |
| 216033_s_at | 503.1  | 258.6  | 2491.8  | 22     | 27.0 | FYN oncogene related to SRC, FGR, YES                                                                             | FYN                |
| 206785_s_at | 46.3   | 11.1   | 345.9   | 2.3    | 27.0 | killer cell lectin-like receptor subfamily C, member 1 /// killer cell lectin-like receptor subfamily C, member 2 | KLRC1 ///<br>KLRC2 |
| 213712_at   | 86.4   | 15     | 1058.3  | 3      | 27.0 | elongation of very long chain fatty acids (FEN1/Elo2, SUR4/Elo3, yeast)-like 2                                    | ELOVL2             |
| 204518_s_at | 35.7   | 27.8   | 1300.7  | 8.2    | 27.0 | peptidylprolyl isomerase C (cyclophilin C)                                                                        | PPIC               |
| 203922_s_at | 312.1  | 123.8  | 1877.8  | 77.6   | 26.7 | cytochrome b-245, beta polypeptide (chronic granulomatous disease)                                                | CYBB               |
| 204669_s_at | 173.3  | 18.2   | 2477.9  | 12     | 26.7 | ring finger protein 24                                                                                            | RNF24              |
| 209081_s_at | 26.6   | 7.7    | 800.2   | 5.9    | 26.7 | collagen, type XVIII, alpha 1                                                                                     | COL18A1            |
| 212352_s_at | 1654.9 | 932.1  | 8879.8  | 606.1  | 26.7 | transmembrane emp24-like trafficking protein 10 (yeast)                                                           | TMED10             |

|             |        |        |         |       |      |                                                                                                                                          |                      |
|-------------|--------|--------|---------|-------|------|------------------------------------------------------------------------------------------------------------------------------------------|----------------------|
| 214706_at   | 185.9  | 36.8   | 735.8   | 20.7  | 26.7 | zinc finger protein 200                                                                                                                  | ZNF200               |
| 201703_s_at | 679.9  | 445.1  | 2195.6  | 91.2  | 26.7 | protein phosphatase 1, regulatory subunit 10                                                                                             | PPP1R10              |
| 203929_s_at | 85.4   | 34.9   | 576.4   | 17.3  | 26.7 | microtubule-associated protein tau                                                                                                       | MAPT                 |
| 209331_s_at | 583.4  | 270.7  | 2420    | 106.1 | 26.7 | MYC associated factor X                                                                                                                  | MAX                  |
| 209879_at   | 211.8  | 114.5  | 2395.8  | 43.1  | 26.7 | selectin P ligand                                                                                                                        | SELPLG               |
| 212230_at   | 128.2  | 40.7   | 1062.4  | 14.4  | 26.7 | phosphatidic acid phosphatase type 2B                                                                                                    | PPAP2B               |
| 218904_s_at | 112.6  | 24     | 782.4   | 11.4  | 26.7 | chromosome 9 open reading frame 40                                                                                                       | C9orf40              |
| 208438_s_at | 186.8  | 44.4   | 2461.2  | 11.1  | 26.7 | Gardner-Rasheed feline sarcoma viral (v-fgr) oncogene homolog                                                                            | FGR                  |
| 210222_s_at | 56.5   | 13.7   | 351.5   | 5.1   | 26.7 | reticulon 1                                                                                                                              | RTN1                 |
| 213157_s_at | 62.7   | 32.2   | 547.2   | 9.7   | 26.7 | KIAA0523 protein                                                                                                                         | KIAA0523             |
| 89476_r_at  | 210.9  | 132    | 981.1   | 48.9  | 26.7 | aminopeptidase-like 1                                                                                                                    | NPEPL1               |
| 209434_s_at | 143    | 85.4   | 597.2   | 12.4  | 26.7 | phosphoribosyl pyrophosphate amidotransferase                                                                                            | PPAT                 |
| 206235_at   | 669.4  | 314.9  | 4071.6  | 82    | 26.7 | ligase IV, DNA, ATP-dependent                                                                                                            | LIG4                 |
| 204863_s_at | 160.9  | 119.4  | 837.1   | 8.5   | 26.7 | interleukin 6 signal transducer (gp130, oncostatin M receptor)                                                                           | IL6ST                |
| 206591_at   | 1526.9 | 1040   | 15016.2 | 19.7  | 26.7 | recombination activating gene 1                                                                                                          | RAG1                 |
| 207339_s_at | 2085.6 | 1712.7 | 24613.4 | 77.1  | 26.7 | lymphotoxin beta (TNF superfamily, member 3)                                                                                             | LTB                  |
| 202907_s_at | 582.8  | 409.4  | 2160.4  | 481.3 | 26.3 | nibrin                                                                                                                                   | NBN                  |
| 204725_s_at | 425.6  | 347.8  | 1967.1  | 211.3 | 26.3 | NCK adaptor protein 1                                                                                                                    | NCK1                 |
| 206828_at   | 116.6  | 15.5   | 1426.5  | 10.7  | 26.3 | TXK tyrosine kinase                                                                                                                      | TXK                  |
| 209082_s_at | 125.9  | 14.9   | 1409.2  | 12.6  | 26.3 | collagen, type XVIII, alpha 1                                                                                                            | COL18A1              |
| 210612_s_at | 49.5   | 6.4    | 918.1   | 3.6   | 26.3 | synaptojanin 2                                                                                                                           | SYNJ2                |
| 212179_at   | 1307.2 | 522    | 5366.7  | 338.9 | 26.3 | chromosome 6 open reading frame 111                                                                                                      | C6orf111             |
| 212268_at   | 550.5  | 299    | 11730.6 | 232.6 | 26.3 | serpin peptidase inhibitor, clade B (ovalbumin), member 1                                                                                | SERPINB1             |
| 213126_at   | 31.5   | 10.2   | 218.7   | 6.2   | 26.3 | mediator of RNA polymerase II transcription, subunit 8 homolog (yeast)                                                                   | MED8                 |
| 218446_s_at | 129.4  | 15.8   | 573.3   | 14.2  | 26.3 | family with sequence similarity 18, member B                                                                                             | FAM18B               |
| 220667_at   | 40.1   | 5.2    | 458.2   | 4     | 26.3 | ---                                                                                                                                      | ---                  |
| 200827_at   | 111.6  | 46.7   | 675.1   | 21.4  | 26.3 | procollagen-lysine 1, 2-oxoglutarate 5-dioxygenase 1                                                                                     | PLOD1                |
| 203632_s_at | 31     | 14.2   | 798.1   | 6.3   | 26.3 | G protein-coupled receptor, family C, group 5, member B                                                                                  | GPRC5B               |
| 206302_s_at | 441    | 298.4  | 9153.7  | 39.5  | 26.3 | nudix (nucleoside diphosphate linked moiety X)-type motif 4 /// nudix (nucleoside diphosphate linked moiety X)-type motif 4 pseudogene 1 | NUDT4 ///<br>NUDT4P1 |
| 207703_at   | 50.8   | 10.5   | 406.9   | 4     | 26.3 | neuroligin 4, Y-linked                                                                                                                   | NLGN4Y               |
| 220405_at   | 89.5   | 32.1   | 556.7   | 6.6   | 26.3 | syntrophin, gamma 1                                                                                                                      | SNTG1                |
| 216317_x_at | 150    | 32.7   | 12972.6 | 12.5  | 26.3 | Rhesus blood group, CcEe antigens                                                                                                        | RHCE                 |
| 207851_s_at | 108.7  | 26.6   | 679.3   | 8.1   | 26.3 | insulin receptor                                                                                                                         | INSR                 |

|             |        |        |         |       |      |                                                                                                                                                                                                     |           |
|-------------|--------|--------|---------|-------|------|-----------------------------------------------------------------------------------------------------------------------------------------------------------------------------------------------------|-----------|
| 208492_at   | 60.2   | 22.3   | 287.9   | 7.8   | 26.3 | regulatory factor X-associated protein                                                                                                                                                              | RFXAP     |
| 218232_at   | 91.8   | 45.1   | 1938.4  | 8     | 26.3 | complement component 1, q subcomponent, alpha polypeptide                                                                                                                                           | C1QA      |
| 209815_at   | 167.6  | 45     | 3201    | 3.4   | 26.3 | patched homolog (Drosophila)                                                                                                                                                                        | PTCH      |
| 200871_s_at | 2085.5 | 1361.6 | 14505.4 | 683.1 | 25.9 | prosaposin (variant Gaucher disease and variant metachromatic leukodystrophy)                                                                                                                       | PSAP      |
| 200889_s_at | 527.4  | 422    | 2478.5  | 212.3 | 25.9 | signal sequence receptor, alpha (translocon-associated protein alpha)                                                                                                                               | SSR1      |
| 207341_at   | 128.8  | 16.4   | 22403.2 | 11.7  | 25.9 | proteinase 3 (serine proteinase, neutrophil, Wegener granulomatosis autoantigen)                                                                                                                    | PRTN3     |
| 208420_x_at | 347.2  | 224.8  | 1303.3  | 145.3 | 25.9 | suppressor of Ty 6 homolog (S. cerevisiae)                                                                                                                                                          | SUPT6H    |
| 210016_at   | 148.8  | 7.3    | 3757.5  | 6.9   | 25.9 | myelin transcription factor 1-like                                                                                                                                                                  | MYT1L     |
| 213435_at   | 36.6   | 5.8    | 4632.2  | 5.3   | 25.9 | SATB family member 2                                                                                                                                                                                | SATB2     |
| 217367_s_at | 127.2  | 38.5   | 675.7   | 33.7  | 25.9 | zinc fingers and homeoboxes 3                                                                                                                                                                       | ZHX3      |
| 219346_at   | 56.7   | 4.2    | 502.5   | 4.9   | 25.9 | leucine rich repeat and fibronectin type III domain containing 3                                                                                                                                    | LRFN3     |
| 200816_s_at | 1030.3 | 550.4  | 3684.2  | 240.8 | 25.9 | platelet-activating factor acetylhydrolase, isoform Ib, alpha subunit 45kDa                                                                                                                         | PAFAH1B1  |
| 204858_s_at | 143.8  | 32.9   | 992.8   | 16.2  | 25.9 | endothelial cell growth factor 1 (platelet-derived)                                                                                                                                                 | ECGF1     |
| 214634_at   | 78.2   | 15.8   | 514.9   | 6.9   | 25.9 | ---                                                                                                                                                                                                 | ---       |
| 217695_x_at | 114.1  | 25.5   | 1056.8  | 8.9   | 25.9 | ---                                                                                                                                                                                                 | ---       |
| 211071_s_at | 904.7  | 682.7  | 4373.1  | 322.4 | 25.9 | myeloid/lymphoid or mixed-lineage leukemia (trithorax homolog, Drosophila); translocated to, 11 /// myeloid/lymphoid or mixed-lineage leukemia (trithorax homolog, Drosophila); translocated to, 11 | MLLT11    |
| 212895_s_at | 563.7  | 455.4  | 2422.8  | 191.8 | 25.9 | active BCR-related gene                                                                                                                                                                             | ABR       |
| 206165_s_at | 89.7   | 34.9   | 467.2   | 7.9   | 25.9 | chloride channel, calcium activated, family member 2                                                                                                                                                | CLCA2     |
| 206914_at   | 45.4   | 11.4   | 322.1   | 3.4   | 25.9 | class-I MHC-restricted T cell associated molecule                                                                                                                                                   | CRTAM     |
| 221246_x_at | 217.6  | 148.6  | 2307.1  | 20    | 25.9 | tensin 1 /// tensin 1                                                                                                                                                                               | TNS1      |
| 201380_at   | 278.8  | 197.5  | 1221    | 150.2 | 25.6 | cartilage associated protein                                                                                                                                                                        | CRTAP     |
| 216633_s_at | 45     | 7.7    | 306.4   | 4     | 25.6 | phospholipase C-like 3                                                                                                                                                                              | PLCL3     |
| 221501_x_at | 3049   | 2089.6 | 13557   | 1205  | 25.6 | hypothetical protein LOC339047                                                                                                                                                                      | LOC339047 |
| 45297_at    | 130.3  | 38.8   | 1920.1  | 21.3  | 25.6 | EH-domain containing 2                                                                                                                                                                              | EHD2      |
| 202911_at   | 2201.5 | 1372.5 | 8710.3  | 645.7 | 25.6 | mutS homolog 6 (E. coli)                                                                                                                                                                            | MSH6      |
| 211342_x_at | 784.7  | 489.5  | 3356.7  | 191.2 | 25.6 | mediator of RNA polymerase II transcription, subunit 12 homolog (yeast)                                                                                                                             | MED12     |
| 218445_at   | 81.9   | 36.9   | 733.8   | 13.2  | 25.6 | H2A histone family, member Y2                                                                                                                                                                       | H2AFY2    |
| 202557_at   | 245.1  | 168.8  | 2210.8  | 33.3  | 25.6 | stress 70 protein chaperone, microsome-associated, 60kDa                                                                                                                                            | STCH      |

|             |        |       |         |       |      |                                                                                                                 |           |
|-------------|--------|-------|---------|-------|------|-----------------------------------------------------------------------------------------------------------------|-----------|
| 200890_s_at | 365.9  | 300.3 | 1698.2  | 54    | 25.6 | signal sequence receptor, alpha (translocon-associated protein alpha)                                           | SSR1      |
| 215882_at   | 66.6   | 16.5  | 312.9   | 6.9   | 25.6 | Centrosomal protein 152kDa                                                                                      | CEP152    |
| 219602_s_at | 160.6  | 75.9  | 1545.3  | 11.6  | 25.6 | family with sequence similarity 38, member B                                                                    | FAM38B    |
| 207402_at   | 77.6   | 19.7  | 440.4   | 4.3   | 25.6 | zinc finger protein 132 (clone pHZ-12)                                                                          | ZNF132    |
| 218346_s_at | 682.6  | 523.1 | 11846.5 | 178.6 | 25.6 | sestrin 1                                                                                                       | SESN1     |
| 200952_s_at | 210.9  | 49.5  | 3997.6  | 13    | 25.6 | cyclin D2                                                                                                       | CCND2     |
| 203608_at   | 957    | 649.2 | 5837.5  | 26.7  | 25.6 | aldehyde dehydrogenase 5 family, member A1 (succinate-semialdehyde dehydrogenase)                               | ALDH5A1   |
| 218862_at   | 291.5  | 69    | 2508.3  | 21.1  | 25.6 | ankyrin repeat and SOCS box-containing 13                                                                       | ASB13     |
| 218472_s_at | 154.4  | 91.3  | 793.1   | 9.4   | 25.6 | pelota homolog (Drosophila)                                                                                     | PELO      |
| 201743_at   | 67.2   | 16.5  | 1571.8  | 5.8   | 25.6 | CD14 antigen /// CD14 antigen                                                                                   | CD14      |
| 202669_s_at | 135.9  | 25.9  | 1724    | 10    | 25.6 | ephrin-B2                                                                                                       | EFNB2     |
| 218804_at   | 64.8   | 5.8   | 2319    | 0.7   | 25.6 | transmembrane protein 16A                                                                                       | TMEM16A   |
| 202403_s_at | 154.9  | 62.3  | 1745.3  | 9.2   | 25.6 | collagen, type I, alpha 2                                                                                       | COL1A2    |
| 204014_at   | 10.9   | 7.3   | 504.9   | 2.6   | 25.6 | dual specificity phosphatase 4                                                                                  | DUSP4     |
| 213959_s_at | 69.6   | 41.5  | 719     | 2.8   | 25.6 | KIAA1005 protein                                                                                                | KIAA1005  |
| 219759_at   | 415.7  | 208.8 | 3312.2  | 14.4  | 25.6 | leukocyte-derived arginine aminopeptidase                                                                       | LRAP      |
| 204445_s_at | 613.4  | 374.9 | 3692.5  | 11.5  | 25.6 | arachidonate 5-lipoxygenase                                                                                     | ALOX5     |
| 208542_x_at | 25.5   | 8.2   | 342.1   | 5.1   | 25.2 | zinc finger protein 208                                                                                         | ZNF208    |
| 212198_s_at | 551.4  | 331.2 | 1856.6  | 315.1 | 25.2 | transmembrane 9 superfamily protein member 4                                                                    | TM9SF4    |
| 212203_x_at | 2643.1 | 932.3 | 13245.4 | 931   | 25.2 | interferon induced transmembrane protein 3 (1-8U)                                                               | IFITM3    |
| 216040_x_at | 150.4  | 37.2  | 761.3   | 22    | 25.2 | CDNA FLJ14073 fis, clone HEMBB1001812                                                                           | ---       |
| 218045_x_at | 14.8   | 6.1   | 528.4   | 4.1   | 25.2 | parathymosin                                                                                                    | PTMS      |
| 218546_at   | 35.7   | 13.4  | 844.5   | 6.8   | 25.2 | chromosome 1 open reading frame 115                                                                             | C1orf115  |
| 219364_at   | 35.3   | 18    | 376.4   | 11.1  | 25.2 | likely ortholog of mouse D11lgp2                                                                                | LGP2      |
| 204413_at   | 67.7   | 31    | 410.9   | 13.9  | 25.2 | TNF receptor-associated factor 2                                                                                | TRAF2     |
| 205400_at   | 209.8  | 62.9  | 1064.9  | 26.4  | 25.2 | Wiskott-Aldrich syndrome (eczema-thrombocytopenia)                                                              | WAS       |
| 209684_at   | 126.1  | 19.5  | 1033.7  | 9.4   | 25.2 | Ras and Rab interactor 2                                                                                        | RIN2      |
| 213510_x_at | 403.9  | 267.7 | 1583.6  | 42.9  | 25.2 | TL132 protein                                                                                                   | LOC220594 |
| 221584_s_at | 75.5   | 27.7  | 536.4   | 6.7   | 25.2 | potassium large conductance calcium-activated channel, subfamily M, alpha member 1                              | KCNMA1    |
| 222078_at   | 51.2   | 19.6  | 743.7   | 7.2   | 25.2 | Hyperpolarization activated cyclic nucleotide-gated potassium channel 3                                         | HCN3      |
| 202687_s_at | 168.8  | 60.4  | 2096    | 16.1  | 25.2 | tumor necrosis factor (ligand) superfamily, member 10 /// tumor necrosis factor (ligand) superfamily, member 10 | TNFSF10   |
| 203102_s_at | 543.5  | 357   | 2600.5  | 61.1  | 25.2 | mannosyl (alpha-1,6-)-glycoprotein beta-1,2-N-acetylglucosaminyltransferase                                     | MGAT2     |



|             |        |        |         |        |      |                                                                                           |           |
|-------------|--------|--------|---------|--------|------|-------------------------------------------------------------------------------------------|-----------|
| 207269_at   | 201.2  | 140.2  | 50844.5 | 26.2   | 25.2 | defensin, alpha 4, corticostatin                                                          | DEFA4     |
| 214393_at   | 51.3   | 14.2   | 951.1   | 3.8    | 25.2 | hypothetical protein LOC284062                                                            | LOC284062 |
| 220713_at   | 153.5  | 131.7  | 1002    | 27.8   | 25.2 | Chromosome 11 open reading frame 49                                                       | C11orf49  |
| 206983_at   | 98.4   | 40.3   | 1311.9  | 4.3    | 25.2 | chemokine (C-C motif) receptor 6                                                          | CCR6      |
| 220416_at   | 88.4   | 44.1   | 3159.1  | 3.4    | 25.2 | ATPase, Class I, type 8B, member 4                                                        | ATP8B4    |
| 204349_at   | 108    | 6.7    | 412.9   | 6.6    | 24.8 | cofactor required for Sp1 transcriptional activation, subunit 9, 33kDa                    | CRSP9     |
| 205718_at   | 208.5  | 12.1   | 3223.5  | 10.9   | 24.8 | integrin, beta 7                                                                          | ITGB7     |
| 210774_s_at | 3772.2 | 3234.2 | 41868.2 | 1733.7 | 24.8 | nuclear receptor coactivator 4                                                            | NCOA4     |
| 212552_at   | 1213.9 | 967.9  | 6135.2  | 553.6  | 24.8 | hippocalcin-like 1                                                                        | HPCAL1    |
| 202598_at   | 650    | 437.8  | 5525.2  | 129    | 24.8 | S100 calcium binding protein A13                                                          | S100A13   |
| 204414_at   | 27.6   | 5      | 243.4   | 1.9    | 24.8 | like-glycosyltransferase                                                                  | LARGE     |
| 210128_s_at | 183    | 38.2   | 1125.8  | 18.6   | 24.8 | leukotriene B4 receptor                                                                   | LTB4R     |
| 212217_at   | 273.7  | 155.4  | 836.9   | 60.3   | 24.8 | prolyl endopeptidase-like                                                                 | PREPL     |
| 210738_s_at | 22.2   | 4.5    | 251.4   | 1.3    | 24.8 | solute carrier family 4, sodium bicarbonate cotransporter, member 4                       | SLC4A4    |
| 202599_s_at | 2080.2 | 919.5  | 11117.1 | 95.4   | 24.8 | nuclear receptor interacting protein 1                                                    | NRIP1     |
| 205795_at   | 30.2   | 14.8   | 1096.1  | 2.6    | 24.8 | neurexin 3                                                                                | NRXN3     |
| 206372_at   | 50     | 23.6   | 1704    | 5.3    | 24.8 | myogenic factor 6 (herculin)                                                              | MYF6      |
| 206231_at   | 289.9  | 145.6  | 1890.7  | 37.6   | 24.8 | potassium intermediate/small conductance calcium-activated channel, subfamily N, member 1 | KCNN1     |
| 209169_at   | 136.9  | 40.3   | 1283.6  | 3.5    | 24.8 | glycoprotein M6B                                                                          | GPM6B     |
| 208981_at   | 738.3  | 406.5  | 5037.4  | 25.6   | 24.8 | platelet/endothelial cell adhesion molecule (CD31 antigen)                                | PECAM1    |

Table S3. Probesets underexpressed in 25% of more of B-lineage ALL cases (n =270) as compared to normal bone marrow CD19+CD10+ cells from 4 healthy donors

| probe set ID | CD10+<br>CD19+<br>max | CD10+<br>CD19+<br>min | ALL max | ALL min | % ALL<br>under<br>expressed | Title                                                                                                                                   | Symbol  |
|--------------|-----------------------|-----------------------|---------|---------|-----------------------------|-----------------------------------------------------------------------------------------------------------------------------------------|---------|
| 202388_at    | 29835.8               | 25562.5               | 9759.4  | 10.9    | 100                         | regulator of G-protein signalling 2, 24kDa                                                                                              | RGS2    |
| 204207_s_at  | 4433.5                | 3175.3                | 1223.2  | 332.7   | 100                         | RNA guanylyltransferase and 5'-phosphatase                                                                                              | RNGTT   |
| 204208_at    | 3110                  | 1717.1                | 772.2   | 18.6    | 100                         | RNA guanylyltransferase and 5'-phosphatase                                                                                              | RNGTT   |
| 201853_s_at  | 12593.8               | 6539                  | 3519.8  | 478.8   | 100                         | cell division cycle 25B                                                                                                                 | CDC25B  |
| 202626_s_at  | 5962.8                | 4459.4                | 4793.6  | 161.8   | 99                          | v-yes-1 Yamaguchi sarcoma viral related oncogene homolog                                                                                | LYN     |
| 205942_s_at  | 2204.8                | 1110.2                | 623.9   | 6.3     | 99                          | acyl-CoA synthetase medium-chain family member 3                                                                                        | ACSM3   |
| 207540_s_at  | 5984.8                | 4323.6                | 2507.6  | 34.6    | 99                          | spleen tyrosine kinase                                                                                                                  | SYK     |
| 206046_at    | 1778.2                | 1399.6                | 3305.2  | 24.2    | 99                          | ADAM metallopeptidase domain 23                                                                                                         | ADAM23  |
| 210377_at    | 1677                  | 767.9                 | 656.8   | 6.9     | 99                          | acyl-CoA synthetase medium-chain family member 3                                                                                        | ACSM3   |
| 210754_s_at  | 6524.5                | 5533.3                | 5518.6  | 119.3   | 98                          | v-yes-1 Yamaguchi sarcoma viral related oncogene homolog                                                                                | LYN     |
| 201465_s_at  | 1499.1                | 591.2                 | 823.4   | 6.2     | 98                          | v-jun sarcoma virus 17 oncogene homolog (avian)                                                                                         | JUN     |
| 203927_at    | 1369.3                | 1138.3                | 916.8   | 67.1    | 97                          | nuclear factor of kappa light polypeptide gene enhancer in B-cells inhibitor, epsilon                                                   | NFKBIE  |
| 211639_x_at  | 3276                  | 2582.8                | 14470.8 | 9.9     | 97                          | Isolate Black93 immunoglobulin heavy chain variable region (IGVH) /// Isolate Black93 immunoglobulin heavy chain variable region (IGVH) | ---     |
| 216834_at    | 8959.4                | 2947.1                | 7948.4  | 3.6     | 97                          | regulator of G-protein signalling 1                                                                                                     | RGS1    |
| 207574_s_at  | 6491.2                | 3330.7                | 5589.1  | 23.7    | 96                          | growth arrest and DNA-damage-inducible, beta                                                                                            | GADD45B |
| 209305_s_at  | 7175.5                | 3216.3                | 4660.8  | 35.8    | 96                          | growth arrest and DNA-damage-inducible, beta                                                                                            | GADD45B |
| 211633_x_at  | 3257.1                | 1593.6                | 1815.9  | 9.4     | 96                          | Immunoglobulin heavy constant gamma 1                                                                                                   | IGHG1   |
| 213419_at    | 1983.8                | 877.8                 | 809.5   | 4       | 96                          | amyloid beta (A4) precursor protein-binding, family B, member 2 (Fe65-like)                                                             | APBB2   |
| 217168_s_at  | 6948.2                | 4299.7                | 9008.6  | 277     | 96                          | homocysteine-inducible, endoplasmic reticulum stress-inducible, ubiquitin-like domain member 1                                          | HERPUD1 |
| 213808_at    | 1370.8                | 704.8                 | 6121.1  | 3.6     | 96                          | ADAM metallopeptidase domain 23                                                                                                         | ADAM23  |
| 201044_x_at  | 4997.4                | 1908.8                | 4534.7  | 6.1     | 96                          | dual specificity phosphatase 1                                                                                                          | DUSP1   |
| 201416_at    | 19683.9               | 13224.7               | 36012.1 | 314.4   | 96                          | SRY (sex determining region Y)-box 4                                                                                                    | SOX4    |
| 205297_s_at  | 17637                 | 11257.6               | 8701    | 19.1    | 96                          | CD79B antigen (immunoglobulin-associated beta)                                                                                          | CD79B   |
| 221986_s_at  | 1516.8                | 1088.1                | 1221.8  | 8.2     | 96                          | kelch-like 24 (Drosophila)                                                                                                              | KLHL24  |
| 203036_s_at  | 377.2                 | 246.6                 | 424.5   | 7.5     | 96                          | metastasis suppressor 1                                                                                                                 | MTSS1   |
| 209304_x_at  | 5576.4                | 2633.1                | 4811.7  | 23.5    | 96                          | growth arrest and DNA-damage-inducible, beta                                                                                            | GADD45B |

|             |         |         |         |       |    |                                                                                                                         |                                            |
|-------------|---------|---------|---------|-------|----|-------------------------------------------------------------------------------------------------------------------------|--------------------------------------------|
| 202191_s_at | 5953.1  | 2637.8  | 2695.5  | 15.6  | 95 | growth arrest-specific 7                                                                                                | GAS7                                       |
| 215949_x_at | 2781.1  | 1745.5  | 3036.2  | 10.6  | 95 | immunoglobulin heavy constant mu                                                                                        | IGHM                                       |
| 211650_x_at | 3663.2  | 1700.3  | 18473.5 | 9.6   | 95 | IgG heavy chain variable region (Vh26) /// IgG heavy chain variable region (Vh26)                                       | ---                                        |
| 214623_at   | 1081.8  | 683.7   | 927     | 6.8   | 94 | split hand/foot malformation (ectrodactyly) type 3 pseudogene 1                                                         | SHFM3P1                                    |
| 216491_x_at | 7328.1  | 6235.1  | 10541.5 | 7.6   | 94 | immunoglobulin heavy constant mu                                                                                        | IGHM                                       |
| 211637_x_at | 6888.7  | 4946.8  | 11825.7 | 12.2  | 94 | Immunoglobulin heavy chain variable region (VH IV family) from IgM rheumatoid factor                                    | ---                                        |
| 214522_x_at | 1124.3  | 1009.1  | 1334.7  | 7.2   | 94 | histone 1, H3d                                                                                                          | HIST1H3D                                   |
| 40148_at    | 1381.9  | 627.4   | 593.3   | 4.4   | 94 | amyloid beta (A4) precursor protein-binding, family B, member 2 (Fe65-like)                                             | APBB2                                      |
| 220668_s_at | 2345.6  | 1514.1  | 5694.5  | 21.5  | 94 | DNA (cytosine-5-)-methyltransferase 3 beta                                                                              | DNMT3B                                     |
| 204730_at   | 4967.4  | 2864    | 8362.2  | 16.1  | 93 | regulating synaptic membrane exocytosis 3                                                                               | RIMS3                                      |
| 214916_x_at | 14343.8 | 6892.4  | 17677.2 | 82.3  | 93 | immunoglobulin heavy locus                                                                                              | IGH@                                       |
| 218205_s_at | 19891.4 | 12578.8 | 17879.7 | 801.3 | 93 | MAP kinase interacting serine/threonine kinase 2                                                                        | MKNK2                                      |
| 202988_s_at | 2636.3  | 560.9   | 2173.7  | 2.9   | 93 | regulator of G-protein signalling 1                                                                                     | RGS1                                       |
| 206864_s_at | 1273.7  | 714.7   | 857.8   | 1.8   | 93 | harakiri, BCL2 interacting protein (contains only BH3 domain)                                                           | HRK                                        |
| 210150_s_at | 1324.2  | 1056    | 1372.4  | 5     | 93 | laminin, alpha 5                                                                                                        | LAMA5                                      |
| 214973_x_at | 6122    | 2443.4  | 7633.2  | 10.1  | 93 | immunoglobulin heavy constant delta                                                                                     | IGHD                                       |
| 217281_x_at | 3751.2  | 1876.2  | 4004.5  | 5.9   | 93 | Isolate Rice94 immunoglobulin heavy chain variable region (IGVH)                                                        | ---                                        |
| 214669_x_at | 8995.8  | 5783    | 18674.6 | 159.4 | 93 | Immunoglobulin kappa variable 1-5                                                                                       | IGKC                                       |
| 209062_x_at | 1688.2  | 1275.6  | 1789.8  | 32.3  | 92 | nuclear receptor coactivator 3                                                                                          | NCOA3                                      |
| 221496_s_at | 1497.2  | 419.1   | 773.1   | 6.1   | 92 | transducer of ERBB2, 2                                                                                                  | TOB2                                       |
| 216510_x_at | 3545    | 1371.3  | 10120.1 | 4.8   | 92 | immunoglobulin heavy constant alpha 1 /// immunoglobulin heavy constant delta /// immunoglobulin heavy constant gamma 1 | IGHA1 ///<br>IGHD ///<br>IGHG1 ///<br>IGHM |
| 204562_at   | 17170.2 | 7589.8  | 8919.6  | 61.1  | 92 | interferon regulatory factor 4                                                                                          | IRF4                                       |
| 201779_s_at | 4113.5  | 2884    | 2079.7  | 439.5 | 91 | ring finger protein 13                                                                                                  | RNF13                                      |
| 211849_s_at | 1289    | 694.5   | 544.9   | 13    | 91 | RNA guanylyltransferase and 5'-phosphatase                                                                              | RNGTT                                      |
| 216986_s_at | 1767    | 1088.9  | 1045.9  | 26.5  | 91 | interferon regulatory factor 4                                                                                          | IRF4                                       |
| 201303_at   | 11275.3 | 6684.6  | 4953    | 869.3 | 91 | DEAD (Asp-Glu-Ala-Asp) box polypeptide 48                                                                               | DDX48                                      |
| 211798_x_at | 3202.8  | 1844.7  | 2570.4  | 13    | 91 | immunoglobulin lambda joining 3                                                                                         | IGLJ3                                      |
| 212985_at   | 1998.5  | 948.9   | 1367.1  | 5     | 91 | Hypothetical protein FLJ14001                                                                                           | FLJ14001                                   |
| 213593_s_at | 2902.3  | 1697.1  | 1429.1  | 15    | 91 | Transformer-2 alpha                                                                                                     | TRA2A                                      |

|             |         |         |         |       |    |                                                                                                                                 |                                 |
|-------------|---------|---------|---------|-------|----|---------------------------------------------------------------------------------------------------------------------------------|---------------------------------|
| 216557_x_at | 4084.7  | 1926.7  | 9300.4  | 89.7  | 91 | immunoglobulin heavy constant alpha 1 ///<br>immunoglobulin heavy constant gamma 1 ///<br>immunoglobulin heavy constant gamma 3 | IGHA1 ///<br>IGHG1 ///<br>IGHG3 |
| 210693_at   | 647     | 223.3   | 700.9   | 6.5   | 91 | signal peptide peptidase-like 2B                                                                                                | SPPL2B                          |
| 217360_x_at | 679     | 447.1   | 853.8   | 5.2   | 91 | immunoglobulin heavy constant alpha 1 ///<br>immunoglobulin heavy constant gamma 1 ///<br>immunoglobulin heavy constant gamma 3 | IGHA1 ///<br>IGHG1 ///<br>IGHG3 |
| 204440_at   | 4557.9  | 1759.5  | 9729.2  | 47.8  | 91 | CD83 antigen (activated B lymphocytes, immunoglobulin superfamily)                                                              | CD83                            |
| 203865_s_at | 2572.5  | 1405.4  | 3163.5  | 7.1   | 90 | adenosine deaminase, RNA-specific, B1 (RED1 homolog rat)                                                                        | ADARB1                          |
| 215121_x_at | 38082.2 | 24742.4 | 97827.3 | 411.9 | 90 | immunoglobulin lambda locus                                                                                                     | IGL@                            |
| 212942_s_at | 1062.1  | 467.7   | 871.1   | 6.3   | 90 | KIAA1199                                                                                                                        | KIAA1199                        |
| 204786_s_at | 1394.1  | 633.2   | 626.5   | 7.3   | 90 | interferon (alpha, beta and omega) receptor 2                                                                                   | IFNAR2                          |
| 210172_at   | 2090.8  | 1430.9  | 2185.8  | 19.3  | 90 | splicing factor 1                                                                                                               | SF1                             |
| 213511_s_at | 8132.9  | 5082.3  | 4143.4  | 404.6 | 90 | myotubularin related protein 1                                                                                                  | MTMR1                           |
| 221985_at   | 1969.6  | 1635.9  | 1694.5  | 229.7 | 90 | kelch-like 24 (Drosophila)                                                                                                      | KLHL24                          |
| 203751_x_at | 6801.2  | 2457.2  | 9483.9  | 3.2   | 89 | jun D proto-oncogene                                                                                                            | JUND                            |
| 205466_s_at | 456.1   | 371.8   | 864.3   | 2.5   | 89 | heparan sulfate (glucosamine) 3-O-sulfotransferase 1                                                                            | HS3ST1                          |
| 207993_s_at | 767.8   | 450     | 542.3   | 9     | 89 | calcium binding protein P22                                                                                                     | CHP                             |
| 208553_at   | 538.7   | 230     | 415.9   | 5.2   | 89 | histone 1, H1e                                                                                                                  | HIST1H1E                        |
| 213638_at   | 2518.5  | 972.3   | 1773.4  | 7.5   | 89 | phosphatase and actin regulator 1                                                                                               | PHACTR1                         |
| 202779_s_at | 4064.5  | 2660.1  | 7091.4  | 94    | 89 | ubiquitin-conjugating enzyme E2S                                                                                                | UBE2S                           |
| 212350_at   | 4326.3  | 3443.9  | 2686.8  | 395.3 | 89 | TBC1 (tre-2/USP6, BUB2, cdc16) domain family, member 1                                                                          | TBC1D1                          |
| 214777_at   | 2535.8  | 914.1   | 3431.5  | 11    | 88 | Ig rearranged kappa-chain mRNA V-J1-region, hybridoma AE6-5, 5' end                                                             | ---                             |
| 221909_at   | 512.9   | 332.3   | 781.3   | 8.1   | 88 | hypothetical protein FLJ14627                                                                                                   | FLJ14627                        |
| 216401_x_at | 2337.3  | 950.1   | 2657.3  | 16.9  | 87 | Ig rearranged kappa-chain mRNA V-J1-region, hybridoma AE6-5, 5' end /// Immunoglobulin kappa constant                           | LOC400969<br>/// IGKC           |
| 219878_s_at | 867.1   | 176.2   | 962.9   | 4.9   | 87 | Kruppel-like factor 13                                                                                                          | KLF13                           |
| 221807_s_at | 2186.5  | 1302.7  | 2491.7  | 10.9  | 87 | hypothetical protein PP2447                                                                                                     | PP2447                          |
| 201668_x_at | 1020.2  | 570.7   | 1370.6  | 10.9  | 87 | myristoylated alanine-rich protein kinase C substrate                                                                           | MARCKS                          |
| 203589_s_at | 901     | 779.9   | 1067.2  | 30.8  | 87 | transcription factor Dp-2 (E2F dimerization partner 2)                                                                          | TFDP2                           |
| 219202_at   | 1964.6  | 1420.8  | 1763.9  | 17    | 87 | rhomoid, veinlet-like 6 (Drosophila)                                                                                            | RHBDL6                          |
| 221969_at   | 13313.2 | 10083.4 | 9494.5  | 125.3 | 87 | Paired box gene 5 (B-cell lineage specific activator)                                                                           | PAX5                            |
| 211649_x_at | 1586.1  | 762.4   | 1034    | 13.7  | 86 | Immunoglobulin heavy constant mu /// Immunoglobulin heavy constant mu                                                           | IGHM                            |
| 216095_x_at | 7254.6  | 3992.8  | 3149.7  | 298   | 86 | myotubularin related protein 1                                                                                                  | MTMR1                           |

|             |         |        |         |       |    |                                                                                                     |                       |
|-------------|---------|--------|---------|-------|----|-----------------------------------------------------------------------------------------------------|-----------------------|
| 215379_x_at | 14893.2 | 7687.7 | 37246.9 | 354.3 | 86 | immunoglobulin lambda locus                                                                         | IGL@                  |
| 214326_x_at | 5238.4  | 1687   | 6719.1  | 4.4   | 86 | jun D proto-oncogene                                                                                | JUND                  |
| 215907_at   | 3754.8  | 2954.9 | 4524.6  | 76.9  | 86 | BTB and CNC homology 1, basic leucine zipper transcription factor 2                                 | BACH2                 |
| 202409_at   | 2262.9  | 492.3  | 35487.2 | 16.3  | 86 | putative insulin-like growth factor II associated protein                                           | LOC492304             |
| 216560_x_at | 683.9   | 251.9  | 19290.6 | 10.3  | 86 | Immunoglobulin lambda constant 1 (Mcg marker) /// Immunoglobulin lambda joining 3                   | IGLC1 ///<br>IGLC2    |
| 204255_s_at | 1219.3  | 464.5  | 772     | 11.8  | 86 | vitamin D (1,25- dihydroxyvitamin D3) receptor                                                      | VDR                   |
| 205861_at   | 6899.6  | 4313.1 | 13176.4 | 51.1  | 86 | Spi-B transcription factor (Spi-1/PU.1 related) /// Spi-B transcription factor (Spi-1/PU.1 related) | SPIB                  |
| 212451_at   | 1861.4  | 829.1  | 774.2   | 27.7  | 86 | KIAA0256 gene product                                                                               | KIAA0256              |
| 213998_s_at | 1316.7  | 735.7  | 2193    | 5.7   | 86 | DEAD (Asp-Glu-Ala-Asp) box polypeptide 17                                                           | DDX17                 |
| 214455_at   | 1162.4  | 460.7  | 831.8   | 4.9   | 86 | histone 1, H2bc                                                                                     | HIST1H2BC             |
| 213668_s_at | 1789.5  | 1185.1 | 4590.5  | 11.1  | 86 | SRY (sex determining region Y)-box 4                                                                | SOX4                  |
| 213575_at   | 2193.8  | 846.7  | 1062.3  | 9.6   | 85 | Transformer-2 alpha                                                                                 | TRA2A                 |
| 216430_x_at | 248.7   | 105    | 730.6   | 7.1   | 85 | Immunoglobulin lambda chain variable region (IGVL gene)region, (IGL)                                | IGLV3-25 ///<br>IGLC2 |
| 206641_at   | 318.9   | 157    | 1268    | 4.5   | 85 | tumor necrosis factor receptor superfamily, member 17                                               | TNFRSF17              |
| 220319_s_at | 3796.9  | 2721.7 | 24534.1 | 150.8 | 85 | myosin regulatory light chain interacting protein                                                   | MYLIP                 |
| 201473_at   | 5254.1  | 1979.2 | 4775.3  | 52    | 84 | jun B proto-oncogene                                                                                | JUNB                  |
| 205805_s_at | 916.2   | 495.5  | 1461.5  | 5.1   | 84 | receptor tyrosine kinase-like orphan receptor 1                                                     | ROR1                  |
| 207521_s_at | 1861    | 1427.3 | 2469.7  | 5.6   | 84 | ATPase, Ca++ transporting, ubiquitous                                                               | ATP2A3                |
| 214911_s_at | 5800.8  | 3632.4 | 5237.4  | 190.2 | 84 | bromodomain containing 2                                                                            | BRD2                  |
| 219752_at   | 2390.6  | 1237.6 | 1756    | 18.2  | 84 | RAS protein activator like 1 (GAP1 like)                                                            | RASAL1                |
| 44790_s_at  | 8505.4  | 3748.8 | 8257.3  | 6     | 84 | chromosome 13 open reading frame 18                                                                 | C13orf18              |
| 206478_at   | 2360.6  | 1769.8 | 5876.1  | 86.6  | 84 | KIAA0125                                                                                            | KIAA0125              |
| 210180_s_at | 2174.2  | 823.3  | 3334.9  | 9.1   | 84 | splicing factor, arginine/serine-rich 10 (transformer 2 homolog, Drosophila)                        | SFRS10                |
| 217677_at   | 3478.3  | 922.5  | 920     | 20.2  | 84 | pleckstrin homology domain containing, family A (phosphoinositide binding specific) member 2        | PLEKHA2               |
| 221671_x_at | 31680.7 | 22551  | 62604.2 | 824.8 | 84 | immunoglobulin kappa constant /// immunoglobulin kappa variable 1-5                                 | IGKC ///<br>IGKV1-5   |
| 211644_x_at | 3855.6  | 1621.8 | 10586.8 | 15.6  | 84 | immunoglobulin kappa constant /// immunoglobulin kappa constant                                     | IGKC                  |
| 203796_s_at | 1878.7  | 1512.3 | 1760.6  | 15    | 83 | B-cell CLL/lymphoma 7A                                                                              | BCL7A                 |
| 209398_at   | 16587.4 | 5879.3 | 9073.2  | 152.8 | 83 | histone 1, H1c                                                                                      | HIST1H1C              |
| 214975_s_at | 2134.4  | 976.2  | 807.9   | 12.8  | 83 | myotubularin related protein 1                                                                      | MTMR1                 |
| 216984_x_at | 2571.9  | 1074.1 | 61397.8 | 14.5  | 83 | Immunoglobulin lambda joining 3                                                                     | IGLC2                 |

|             |         |         |         |        |    |                                                                                                                                            |                              |
|-------------|---------|---------|---------|--------|----|--------------------------------------------------------------------------------------------------------------------------------------------|------------------------------|
| 213811_x_at | 9733.6  | 8324.7  | 8071.1  | 756.7  | 83 | transcription factor 3 (E2A immunoglobulin enhancer binding factors E12/E47)                                                               | TCF3                         |
| 214472_at   | 2531.2  | 829.1   | 2678.5  | 4.6    | 83 | histone 1, H3d                                                                                                                             | HIST1H3D                     |
| 209457_at   | 1335.3  | 711.6   | 3666.5  | 15.2   | 83 | dual specificity phosphatase 5                                                                                                             | DUSP5                        |
| 203588_s_at | 1599.5  | 1292.4  | 3992.3  | 37.4   | 83 | transcription factor Dp-2 (E2F dimerization partner 2)                                                                                     | TFDP2                        |
| 201022_s_at | 2376.3  | 1884.5  | 4537.8  | 55.5   | 83 | destrin (actin depolymerizing factor)                                                                                                      | DSTN                         |
| 204642_at   | 1707.9  | 798.1   | 1750.6  | 10.6   | 83 | endothelial differentiation, sphingolipid G-protein-coupled receptor, 1                                                                    | EDG1                         |
| 221651_x_at | 33345.6 | 22787.2 | 65363   | 833.2  | 83 | immunoglobulin kappa constant /// immunoglobulin kappa variable 1-5                                                                        | IGKC /// IGKV1-5             |
| 205967_at   | 35751.3 | 3512.1  | 6722.1  | 343.1  | 82 | histone 1, H4c                                                                                                                             | HIST1H4C                     |
| 209138_x_at | 29357.3 | 20677.1 | 73861.4 | 288.6  | 82 | Immunoglobulin lambda constant 1 (Mcg marker) /// Dehydrogenase/reductase (SDR family) member 4 like 2 /// Immunoglobulin lambda joining 3 | IGLV3-25 /// DHRS4 /// IGLC2 |
| 220377_at   | 1115.8  | 527     | 2828.2  | 5.7    | 82 | chromosome 14 open reading frame 110                                                                                                       | C14orf110                    |
| 201464_x_at | 6805.8  | 3623.7  | 8372.6  | 35.1   | 82 | v-jun sarcoma virus 17 oncogene homolog (avian)                                                                                            | JUN                          |
| 209558_s_at | 2068    | 1613.9  | 2686.7  | 18.5   | 82 | huntingtin interacting protein-1-related                                                                                                   | HIP1R                        |
| 204254_s_at | 659.8   | 405.3   | 772.8   | 11.3   | 81 | vitamin D (1,25- dihydroxyvitamin D3) receptor                                                                                             | VDR                          |
| 217783_s_at | 13626.2 | 9959.4  | 22889.8 | 1046.7 | 81 | yippee-like 5 (Drosophila)                                                                                                                 | YPEL5                        |
| 218611_at   | 3234.4  | 2084.7  | 3865.3  | 198.3  | 81 | immediate early response 5                                                                                                                 | IER5                         |
| 201670_s_at | 1189.3  | 856.9   | 1989.8  | 3.5    | 81 | myristoylated alanine-rich protein kinase C substrate                                                                                      | MARCKS                       |
| 211641_x_at | 3555.3  | 1451.3  | 3293    | 36.3   | 81 | Isolate Middle91 immunoglobulin heavy chain variable region (IGVH) /// Isolate Middle91 immunoglobulin heavy chain variable region (IGVH)  | ---                          |
| 211643_x_at | 1996.9  | 1433.2  | 2681    | 50.1   | 81 | Immunoglobulin kappa variable 1-5 /// Immunoglobulin kappa variable 1-5                                                                    | IGKC                         |
| 211881_x_at | 2614.2  | 1336    | 2124.8  | 29.4   | 81 | immunoglobulin lambda joining 3                                                                                                            | IGLJ3                        |
| 216365_x_at | 631.9   | 215.9   | 904.6   | 7.3    | 81 | Immunoglobulin lambda constant 1 (Mcg marker)                                                                                              | IGLV3-25                     |
| 208195_at   | 1294.9  | 882     | 2851.1  | 26.5   | 81 | titin                                                                                                                                      | TTN                          |
| 214768_x_at | 1795.5  | 1077.9  | 8676.1  | 16.2   | 81 | (clone TR1.6VL) anti-thyroid peroxidase monoclonal autoantibody IgK chain, V region                                                        | ---                          |
| 201466_s_at | 921.5   | 787.4   | 2738.4  | 9.6    | 81 | v-jun sarcoma virus 17 oncogene homolog (avian)                                                                                            | JUN                          |
| 221841_s_at | 2789.2  | 1790.2  | 11750.7 | 11.4   | 81 | Kruppel-like factor 4 (gut)                                                                                                                | KLF4                         |
| 216576_x_at | 1975.4  | 979.2   | 3352.2  | 16.5   | 81 | Immunoglobulin kappa light chain variable region (IGKV gene), clone 25                                                                     | ---                          |
| 211655_at   | 212     | 201.8   | 745.9   | 3.1    | 81 | Immunoglobulin lambda joining 3                                                                                                            | IGLC2                        |
| 203973_s_at | 1408.8  | 859.5   | 4658    | 6.9    | 81 | CCAAT/enhancer binding protein (C/EBP), delta                                                                                              | CEBPD                        |
| 204315_s_at | 946.5   | 492.1   | 525.7   | 8.3    | 80 | G-2 and S-phase expressed 1                                                                                                                | GTSE1                        |
| 222045_s_at | 857.3   | 586.8   | 1247.2  | 11.5   | 80 | chromosome 20 open reading frame 67                                                                                                        | C20orf67                     |
| 201462_at   | 414.5   | 295.2   | 1052.3  | 7.3    | 80 | secernin 1                                                                                                                                 | SCRN1                        |

|             |         |         |         |       |    |                                                                                                                                                    |                      |
|-------------|---------|---------|---------|-------|----|----------------------------------------------------------------------------------------------------------------------------------------------------|----------------------|
| 221766_s_at | 790.1   | 490.7   | 5906.8  | 5     | 80 | family with sequence similarity 46, member A                                                                                                       | FAM46A               |
| 208937_s_at | 968.9   | 404.1   | 1480.6  | 6.7   | 80 | inhibitor of DNA binding 1, dominant negative helix-loop-helix protein                                                                             | ID1                  |
| 209374_s_at | 37136   | 23220   | 48689.7 | 660.5 | 80 | immunoglobulin heavy constant mu                                                                                                                   | IGHM                 |
| 219517_at   | 1979.2  | 948.8   | 1150.7  | 14.8  | 80 | elongation factor RNA polymerase II-like 3                                                                                                         | ELL3                 |
| 214677_x_at | 32140.2 | 22901.4 | 67468.9 | 346.5 | 80 | immunoglobulin lambda locus                                                                                                                        | <a href="#">IGL@</a> |
| 211199_s_at | 334.7   | 174.5   | 751.5   | 5.8   | 80 | inducible T-cell co-stimulator ligand                                                                                                              | ICOSLG               |
| 210776_x_at | 13331.7 | 9144.1  | 9907.6  | 669.1 | 80 | transcription factor 3 (E2A immunoglobulin enhancer binding factors E12/E47)                                                                       | TCF3                 |
| 218473_s_at | 5608.8  | 4109.8  | 8071.8  | 522.8 | 80 | glycosyltransferase 25 domain containing 1                                                                                                         | GLT25D1              |
| 221239_s_at | 1531.7  | 693     | 3556    | 18    | 80 | Fc receptor-like 2 /// Fc receptor-like 2                                                                                                          | FCRL2                |
| 217258_x_at | 1046.5  | 523.9   | 4342.2  | 8.9   | 80 | Clone ds1-1 immunoglobulin lambda chain VJ region, (IGL)                                                                                           | ---                  |
| 205148_s_at | 385.7   | 200.8   | 687.1   | 7     | 79 | chloride channel 4                                                                                                                                 | CLCN4                |
| 219463_at   | 3214.4  | 1350.9  | 13373   | 14.1  | 79 | chromosome 20 open reading frame 103                                                                                                               | C20orf103            |
| 200920_s_at | 38532.8 | 16690.7 | 33740.6 | 861.8 | 79 | B-cell translocation gene 1, anti-proliferative                                                                                                    | BTG1                 |
| 216356_x_at | 631.4   | 390.7   | 536.4   | 12.7  | 79 | BAI1-associated protein 3                                                                                                                          | BAIAP3               |
| 222044_at   | 1249.2  | 664     | 2083.4  | 26.9  | 79 | ---                                                                                                                                                | ---                  |
| 202946_s_at | 2248.1  | 1707.1  | 6129.4  | 60.2  | 79 | BTB (POZ) domain containing 3                                                                                                                      | BTBD3                |
| 207038_at   | 281.4   | 238.9   | 300.4   | 6.2   | 79 | solute carrier family 16 (monocarboxylic acid transporters), member 6                                                                              | SLC16A6              |
| 207237_at   | 956.6   | 465.4   | 1294    | 12.3  | 79 | potassium voltage-gated channel, shaker-related subfamily, member 3                                                                                | KCNA3                |
| 217384_x_at | 612.4   | 304.7   | 911.3   | 4.8   | 79 | similar to immunoglobulin M chain                                                                                                                  | LOC388255            |
| 209324_s_at | 2041.9  | 708.8   | 6688.9  | 12.5  | 79 | regulator of G-protein signalling 16                                                                                                               | RGS16                |
| 204121_at   | 408.3   | 367.7   | 1061.5  | 6     | 79 | growth arrest and DNA-damage-inducible, gamma                                                                                                      | GADD45G              |
| 203942_s_at | 361     | 171.6   | 475.7   | 4.3   | 78 | MAP/microtubule affinity-regulating kinase 2                                                                                                       | MARK2                |
| 222313_at   | 349.6   | 202.6   | 841.7   | 2.6   | 78 | CCR4-NOT transcription complex, subunit 2                                                                                                          | CNOT2                |
| 219978_s_at | 4662.1  | 2406.5  | 3581.7  | 46.1  | 78 | nucleolar and spindle associated protein 1                                                                                                         | NUSAP1               |
| 213931_at   | 1964.2  | 1049.6  | 5069    | 8.8   | 78 | inhibitor of DNA binding 2, dominant negative helix-loop-helix protein /// inhibitor of DNA binding 2B, dominant negative helix-loop-helix protein | ID2 /// ID2B         |
| 206394_at   | 389.7   | 292.1   | 888.7   | 5.1   | 78 | myosin binding protein C, fast type                                                                                                                | MYBPC2               |
| 202625_at   | 2660.4  | 1441.8  | 2664.1  | 42.3  | 77 | v-yes-1 Yamaguchi sarcoma viral related oncogene homolog /// v-yes-1 Yamaguchi sarcoma viral related oncogene homolog                              | LYN                  |
| 209795_at   | 7502.8  | 6458.6  | 16301.1 | 31.6  | 77 | CD69 antigen (p60, early T-cell activation antigen)                                                                                                | CD69                 |
| 204165_at   | 4862.1  | 2495.5  | 6203    | 70.3  | 77 | WAS protein family, member 1                                                                                                                       | WASF1                |
| 219041_s_at | 5504.4  | 3685.5  | 4616.5  | 468.6 | 77 | replication initiator 1                                                                                                                            | REPIN1               |
| 219471_at   | 12565.2 | 5971.3  | 13508.4 | 33.2  | 77 | chromosome 13 open reading frame 18                                                                                                                | C13orf18             |

|             |         |         |         |        |    |                                                                                                                   |                         |
|-------------|---------|---------|---------|--------|----|-------------------------------------------------------------------------------------------------------------------|-------------------------|
| 220066_at   | 375.4   | 86.3    | 382.2   | 2.5    | 77 | caspase recruitment domain family, member 15                                                                      | CARD15                  |
| 212575_at   | 144.6   | 44.4    | 292.7   | 3.8    | 77 | chromosome 19 open reading frame 6                                                                                | C19orf6                 |
| 212970_at   | 2128.3  | 1091.9  | 1609.5  | 75.3   | 77 | Hypothetical protein FLJ14001                                                                                     | FLJ14001                |
| 219518_s_at | 1488.3  | 893.3   | 1512    | 9.8    | 77 | elongation factor RNA polymerase II-like 3                                                                        | ELL3                    |
| 222015_at   | 633     | 193.6   | 914.6   | 21.6   | 77 | Casein kinase 1, epsilon                                                                                          | CSNK1E                  |
| 209579_s_at | 3990.3  | 2660.8  | 3384    | 170.6  | 76 | methyl-CpG binding domain protein 4                                                                               | MBD4                    |
| 210024_s_at | 2119.7  | 1680.2  | 3640.3  | 12.3   | 76 | ubiquitin-conjugating enzyme E2E 3 (UBC4/5 homolog, yeast)                                                        | UBE2E3                  |
| 216542_x_at | 2645.8  | 1678.4  | 2673.3  | 163.1  | 76 | immunoglobulin heavy constant gamma 1 (G1m marker) /// hypothetical protein MGC27165                              | IGHG1 /// MGC27165      |
| 219396_s_at | 5460.4  | 2755.9  | 13298.1 | 16.4   | 76 | nei endonuclease VIII-like 1 (E. coli)                                                                            | NEIL1                   |
| 205413_at   | 743.7   | 198.2   | 2539.4  | 1.6    | 76 | metallophosphoesterase domain containing 2                                                                        | MPPED2                  |
| 204936_at   | 372.7   | 152.6   | 479     | 8.4    | 76 | mitogen-activated protein kinase kinase kinase kinase 2                                                           | MAP4K2                  |
| 211640_x_at | 1068.2  | 595     | 957.6   | 5.2    | 76 | Immunoglobulin heavy variable 1-69 /// Immunoglobulin heavy variable 1-69                                         | IGHV1-69                |
| 219474_at   | 738.5   | 237.1   | 669.4   | 4.3    | 76 | TPA-induced transmembrane protein                                                                                 | TTMP                    |
| 215918_s_at | 559.5   | 394.8   | 1953.4  | 7      | 76 | spectrin, beta, non-erythrocytic 1                                                                                | SPTBN1                  |
| 208549_x_at | 18830.4 | 15231.4 | 27927.9 | 3006.9 | 75 | prothymosin, alpha                                                                                                | PTMA                    |
| 204004_at   | 706.5   | 501.8   | 1864.2  | 8.2    | 75 | PRKC, apoptosis, WT1, regulator                                                                                   | PAWR                    |
| 212225_at   | 5240.5  | 2651.9  | 5996.8  | 16.3   | 75 | eukaryotic translation initiation factor 1                                                                        | EIF1                    |
| 209994_s_at | 625.3   | 379     | 769.6   | 6.1    | 74 | ATP-binding cassette, sub-family B (MDR/TAP), member 1 /// ATP-binding cassette, sub-family B (MDR/TAP), member 4 | ABCB1 /// ABCB4         |
| 204621_s_at | 690.7   | 254.2   | 6807.8  | 3.7    | 74 | nuclear receptor subfamily 4, group A, member 2                                                                   | NR4A2                   |
| 203749_s_at | 1201.3  | 388.8   | 736.1   | 6.7    | 74 | retinoic acid receptor, alpha                                                                                     | RARA                    |
| 208610_s_at | 3729.1  | 1815    | 3999.5  | 60.7   | 74 | serine/arginine repetitive matrix 2                                                                               | SRRM2                   |
| 210282_at   | 261.2   | 213.2   | 366.3   | 1      | 74 | zinc finger protein 198                                                                                           | ZNF198                  |
| 214860_at   | 430.9   | 222.1   | 490     | 4.6    | 74 | solute carrier family 9 (sodium/hydrogen exchanger), member 7                                                     | SLC9A7                  |
| 217227_x_at | 1602.6  | 756.2   | 2441.6  | 23     | 74 | Rearranged Humigla1L1 gene encoding IgG light chain                                                               | ---                     |
| 201951_at   | 279.8   | 226.8   | 738.3   | 2.9    | 74 | activated leukocyte cell adhesion molecule                                                                        | ALCAM                   |
| 205692_s_at | 4324.2  | 2887.3  | 3686    | 27.6   | 74 | CD38 antigen (p45)                                                                                                | CD38                    |
| 213986_s_at | 841.4   | 593.5   | 1076.9  | 4.5    | 74 | chromosome 19 open reading frame 6                                                                                | C19orf6                 |
| 211634_x_at | 5224.7  | 1694.7  | 4720.7  | 20.3   | 73 | immunoglobulin heavy constant mu /// immunoglobulin heavy constant mu                                             | IGHM                    |
| 81737_at    | 646.3   | 446.2   | 770.6   | 7.4    | 73 | SLC7A5 pseudogene /// Hypothetical protein LOC440345 /// Homo sapiens, clone IMAGE:4271781                        | LOC388221 /// LOC440345 |



|             |         |         |         |        |    |                                                                                                        |              |
|-------------|---------|---------|---------|--------|----|--------------------------------------------------------------------------------------------------------|--------------|
| 202083_s_at | 317.7   | 183.4   | 1605    | 2.4    | 73 | SEC14-like 1 ( <i>S. cerevisiae</i> )                                                                  | SEC14L1      |
| 219737_s_at | 11684.4 | 7378.4  | 14726.6 | 16.7   | 73 | protocadherin 9                                                                                        | PCDH9        |
| 220719_at   | 1481    | 469.5   | 797     | 6.9    | 73 | hypothetical protein FLJ13769                                                                          | FLJ13769     |
| 208785_s_at | 4134.8  | 3677.7  | 13593.6 | 594.9  | 73 | microtubule-associated protein 1 light chain 3 beta                                                    | MAP1LC3B     |
| 209191_at   | 2880.1  | 1467.9  | 6610.5  | 8.6    | 73 | tubulin, beta 6                                                                                        | TUBB6        |
| 217148_x_at | 4052.1  | 2173.6  | 58163.1 | 58     | 73 | immunoglobulin lambda variable 2-14                                                                    | IGLV2-14     |
| 210130_s_at | 974.7   | 577.8   | 889.6   | 18.4   | 73 | transmembrane 7 superfamily member 2                                                                   | TM7SF2       |
| 213311_s_at | 1408    | 1130.2  | 1200.8  | 15.6   | 73 | KIAA1049 protein                                                                                       | KIAA1049     |
| 205484_at   | 938.8   | 533     | 2842.4  | 25     | 73 | signaling threshold regulating transmembrane adaptor 1                                                 | SIT1         |
| 218857_s_at | 1156.2  | 560.9   | 1331.2  | 15.2   | 72 | asparaginase like 1                                                                                    | ASRGL1       |
| 219692_at   | 551     | 246     | 718.4   | 9.5    | 72 | kringle containing transmembrane protein 2                                                             | KREMEN2      |
| 201041_s_at | 31896.4 | 27090.3 | 35352.9 | 639.6  | 72 | dual specificity phosphatase 1                                                                         | DUSP1        |
| 201353_s_at | 1792.5  | 1125.4  | 1363.6  | 42.7   | 72 | bromodomain adjacent to zinc finger domain, 2A                                                         | BAZ2A        |
| 209876_at   | 1164.7  | 741.6   | 933.9   | 25.3   | 72 | G protein-coupled receptor kinase interactor 2                                                         | GIT2         |
| 211908_x_at | 840.4   | 383.1   | 1279.8  | 10.5   | 72 | IgG heavy chain variable region (Vh26) /// IgG heavy chain variable region (Vh26)                      | ---          |
| 213309_at   | 2887.6  | 2012.8  | 3909    | 51.6   | 72 | phospholipase C-like 2                                                                                 | PLCL2        |
| 215176_x_at | 5352.9  | 2060.8  | 9753.4  | 29.7   | 72 | Immunoglobulin kappa light chain variable region (IGKV gene), clone 25                                 | ---          |
| 222158_s_at | 1538.1  | 1024.4  | 8371.1  | 33.7   | 72 | chromosome 1 open reading frame 121                                                                    | C1orf121     |
| 214696_at   | 673.2   | 368     | 3256.6  | 4.3    | 72 | hypothetical protein MGC14376                                                                          | MGC14376     |
| 212886_at   | 3206.4  | 1651.1  | 5457.4  | 89.7   | 71 | DKFZP434C171 protein                                                                                   | DKFZP434C171 |
| 222145_at   | 925.4   | 605.5   | 1445    | 7.4    | 71 | Hypothetical protein LOC440345                                                                         | LOC440345    |
| 215692_s_at | 715.3   | 222.9   | 1591.7  | 3.7    | 71 | metallophosphoesterase domain containing 2                                                             | MPPED2       |
| 218319_at   | 1039.6  | 480.7   | 2475.8  | 2.4    | 71 | pellino homolog 1 ( <i>Drosophila</i> )                                                                | PEL1         |
| 201738_at   | 4836.6  | 3578.5  | 6966.7  | 648.1  | 71 | translation factor sui1 homolog                                                                        | GC20         |
| 202165_at   | 1200.4  | 799.6   | 1456    | 40.8   | 71 | protein phosphatase 1, regulatory (inhibitor) subunit 2                                                | PPP1R2       |
| 202283_at   | 2098.9  | 1138.5  | 3262.7  | 13.2   | 71 | serpin peptidase inhibitor, clade F (alpha-2 antiplasmin, pigment epithelium derived factor), member 1 | SERPINF1     |
| 208621_s_at | 4972.8  | 2805.7  | 15342.9 | 32.8   | 71 | villin 2 (ezrin)                                                                                       | VIL2         |
| 213394_at   | 1188.9  | 875     | 6923.8  | 15.5   | 71 | mitogen activated protein kinase binding protein 1                                                     | MAPKBP1      |
| 213718_at   | 834.5   | 527.1   | 1336.4  | 14.3   | 70 | RNA binding motif protein 4                                                                            | RBM4         |
| 222258_s_at | 686     | 179     | 908.7   | 4.5    | 70 | SH3-domain binding protein 4                                                                           | SH3BP4       |
| 202241_at   | 1454.6  | 748.6   | 2493.8  | 15.4   | 70 | tribbles homolog 1 ( <i>Drosophila</i> )                                                               | TRIB1        |
| 208616_s_at | 10243.9 | 8059.5  | 9030.6  | 2120.1 | 70 | protein tyrosine phosphatase type IVA, member 2                                                        | PTP4A2       |
| 210281_s_at | 603     | 419.9   | 1173.4  | 10.5   | 70 | zinc finger protein 198                                                                                | ZNF198       |
| 221755_at   | 619.1   | 525.1   | 1257    | 7.8    | 70 | EH domain binding protein 1-like 1                                                                     | EHP1L1       |

|             |         |         |         |       |    |                                                                                                                                                                                                         |                     |
|-------------|---------|---------|---------|-------|----|---------------------------------------------------------------------------------------------------------------------------------------------------------------------------------------------------------|---------------------|
| 222315_at   | 717.8   | 189.5   | 3569.7  | 7.5   | 70 | Potassium inwardly-rectifying channel, subfamily J, member 15                                                                                                                                           | KCNJ15              |
| 201961_s_at | 409.1   | 306.2   | 506     | 10.4  | 70 | ring finger protein 41                                                                                                                                                                                  | RNF41               |
| 202864_s_at | 2177.6  | 1438.3  | 2327.6  | 71.3  | 70 | nuclear antigen Sp100                                                                                                                                                                                   | SP100               |
| 204681_s_at | 1024.3  | 453.5   | 1395.2  | 8.1   | 70 | Rap guanine nucleotide exchange factor (GEF) 5                                                                                                                                                          | RAPGEF5             |
| 208018_s_at | 4580.1  | 1787.4  | 3725.6  | 34.5  | 70 | hemopoietic cell kinase                                                                                                                                                                                 | HCK                 |
| 208078_s_at | 7552.5  | 1852.9  | 12086.4 | 22    | 70 | SNF1-like kinase /// SNF1-like kinase                                                                                                                                                                   | SNF1LK              |
| 211635_x_at | 5284    | 1353.9  | 4018.2  | 17.2  | 70 | Immunoglobulin heavy variable 1-69 /// Immunoglobulin heavy variable 1-69                                                                                                                               | IGHV1-69            |
| 212827_at   | 26342.6 | 20722.2 | 42899.7 | 451.6 | 70 | immunoglobulin heavy constant mu /// immunoglobulin heavy constant mu                                                                                                                                   | IGHM                |
| 91703_at    | 987.4   | 806.9   | 1421.1  | 18.6  | 70 | EH domain binding protein 1-like 1                                                                                                                                                                      | EHBP1L1             |
| 202082_s_at | 736.6   | 531.1   | 1740.6  | 7.7   | 70 | SEC14-like 1 (S. cerevisiae)                                                                                                                                                                            | SEC14L1             |
| 209711_at   | 2282.7  | 1650.5  | 4802    | 123.6 | 70 | solute carrier family 35 (UDP-glucuronic acid/UDP-N-acetylgalactosamine dual transporter), member D1                                                                                                    | SLC35D1             |
| 209765_at   | 1649    | 1006.1  | 1671.7  | 25    | 69 | ADAM metallopeptidase domain 19 (meltrin beta)                                                                                                                                                          | ADAM19              |
| 209189_at   | 18298   | 8625.6  | 23154.4 | 27.1  | 69 | v-fos FBJ murine osteosarcoma viral oncogene homolog                                                                                                                                                    | FOS                 |
| 214836_x_at | 6042.5  | 2307.2  | 9640.9  | 95.8  | 69 | immunoglobulin kappa constant /// immunoglobulin kappa variable 1-5                                                                                                                                     | IGKC ///<br>IGKV1-5 |
| 211645_x_at | 4806.7  | 1366.1  | 6733.2  | 32.1  | 69 | Immunoglobulin kappa light chain (IGKV) mRNA variable region, joining region, and constant region /// Immunoglobulin kappa light chain (IGKV) mRNA variable region, joining region, and constant region | ---                 |
| 220046_s_at | 9791.7  | 5330.2  | 18566.8 | 700.8 | 69 | cyclin L1                                                                                                                                                                                               | CCNL1               |
| 222067_x_at | 5113.8  | 2281.1  | 5150.2  | 71    | 69 | histone 1, H2bd                                                                                                                                                                                         | HIST1H2BD           |
| 201739_at   | 1031.8  | 566.7   | 15238.3 | 9.4   | 69 | serum/glucocorticoid regulated kinase                                                                                                                                                                   | SGK                 |
| 201792_at   | 3894.1  | 2225.8  | 6769.2  | 32.7  | 68 | AE binding protein 1                                                                                                                                                                                    | AEBP1               |
| 213476_x_at | 4760.7  | 3613.7  | 8249    | 538.4 | 68 | tubulin, beta 3                                                                                                                                                                                         | TUBB3               |
| 214290_s_at | 37691.1 | 15264.6 | 33965.1 | 608.2 | 68 | histone 2, H2aa                                                                                                                                                                                         | HIST2H2AA           |
| 214708_at   | 244.2   | 114.9   | 451.8   | 4.4   | 68 | syntrophin, beta 1 (dystrophin-associated protein A1, 59kDa, basic component 1)                                                                                                                         | SNTB1               |
| 218612_s_at | 1028.2  | 575     | 970.5   | 27.3  | 68 | tumor suppressing subtransferable candidate 4                                                                                                                                                           | TSSC4               |
| 218696_at   | 3446.9  | 3255.1  | 8935    | 148.1 | 68 | eukaryotic translation initiation factor 2-alpha kinase 3                                                                                                                                               | EIF2AK3             |
| 200846_s_at | 6661.4  | 5681.8  | 8018    | 491.9 | 68 | protein phosphatase 1, catalytic subunit, alpha isoform                                                                                                                                                 | PPP1CA              |
| 201392_s_at | 1306    | 739.6   | 1220.5  | 7     | 68 | insulin-like growth factor 2 receptor                                                                                                                                                                   | IGF2R               |
| 208576_s_at | 282.8   | 114.3   | 298.8   | 3.6   | 68 | histone 1, H3b                                                                                                                                                                                          | HIST1H3B            |
| 204192_at   | 13251.7 | 5624.7  | 10302.9 | 225.6 | 67 | CD37 antigen                                                                                                                                                                                            | CD37                |

|             |         |         |         |        |    |                                                                                                                           |                    |
|-------------|---------|---------|---------|--------|----|---------------------------------------------------------------------------------------------------------------------------|--------------------|
| 208091_s_at | 4116.6  | 2073.2  | 3069.3  | 124.4  | 67 | EGFR-coamplified and overexpressed protein /// EGFR-coamplified and overexpressed protein                                 | ECOP               |
| 215214_at   | 1058.7  | 400.8   | 17480.7 | 5      | 67 | Immunoglobulin lambda constant 1 (Mcg marker) /// Immunoglobulin lambda joining 3                                         | IGLV3-25 /// IGLC2 |
| 217378_x_at | 2616.1  | 1178.5  | 7662.5  | 21     | 67 | similar to Ig kappa chain precursor V region (orphon V108) - human (fragment)                                             | LOC391427          |
| 207704_s_at | 1084.8  | 780.1   | 1241.6  | 15.7   | 67 | growth arrest-specific 7                                                                                                  | GAS7               |
| 218100_s_at | 1189.7  | 690.8   | 2508    | 51.4   | 67 | estrogen-related receptor beta like 1                                                                                     | ESRRBL1            |
| 202147_s_at | 1318.9  | 508.9   | 1610.5  | 9.8    | 67 | interferon-related developmental regulator 1                                                                              | IFRD1              |
| 208727_s_at | 9260.1  | 1361    | 4138.1  | 45.2   | 67 | cell division cycle 42 (GTP binding protein, 25kDa)                                                                       | CDC42              |
| 216706_x_at | 207     | 79.7    | 368.5   | 6.9    | 67 | Active Ig mu-chain mRNA V-region (VDJ), 5' end, clone mu-11-8                                                             | ---                |
| 219751_at   | 310.6   | 231.6   | 420.2   | 5.3    | 67 | hypothetical protein FLJ21148                                                                                             | FLJ21148           |
| 215092_s_at | 361.3   | 186.8   | 1137.8  | 11.4   | 67 | nuclear factor of activated T-cells 5, tonicity-responsive                                                                | NFAT5              |
| 219577_s_at | 1163.9  | 833.6   | 3119.6  | 54.9   | 67 | ATP-binding cassette, sub-family A (ABC1), member 7                                                                       | ABCA7              |
| 202733_at   | 4530.6  | 1589.5  | 2513.1  | 12.8   | 66 | procollagen-proline, 2-oxoglutarate 4-dioxygenase (proline 4-hydroxylase), alpha polypeptide II                           | P4HA2              |
| 207819_s_at | 806.5   | 550.4   | 1100.7  | 8      | 66 | ATP-binding cassette, sub-family B (MDR/TAP), member 4                                                                    | ABCB4              |
| 211944_at   | 1418.4  | 805     | 1310.1  | 17.6   | 66 | BAT2 domain containing 1                                                                                                  | BAT2D1             |
| 200702_s_at | 1386.6  | 561.8   | 1982.9  | 16.2   | 66 | DEAD (Asp-Glu-Ala-Asp) box polypeptide 24                                                                                 | DDX24              |
| 203752_s_at | 21461.8 | 16988.4 | 36043.8 | 2627.2 | 66 | jun D proto-oncogene                                                                                                      | JUND               |
| 210640_s_at | 260.5   | 106.6   | 2653.6  | 8.5    | 66 | G protein-coupled receptor 30                                                                                             | GPR30              |
| 217320_at   | 311.9   | 147.1   | 738.6   | 3.4    | 66 | Ig rearranged gamma-chain mRNA V-region, 5' end of cds (from clone S9P16)                                                 | ---                |
| 205780_at   | 605.3   | 143     | 1884.3  | 6.7    | 66 | BCL2-interacting killer (apoptosis-inducing)                                                                              | BIK                |
| 202844_s_at | 853.6   | 453     | 685.1   | 11.7   | 66 | ralA binding protein 1                                                                                                    | RALBP1             |
| 217198_x_at | 779.9   | 452.7   | 1188.6  | 8.5    | 66 | immunoglobulin heavy locus /// immunoglobulin heavy constant delta /// immunoglobulin heavy constant gamma 1 (G1m marker) | IGH@ /// IGHG1     |
| 218404_at   | 346     | 122.8   | 533.2   | 7.7    | 66 | sorting nexin 10                                                                                                          | SNX10              |
| 209372_x_at | 576.3   | 131.3   | 1377.7  | 9.4    | 66 | tubulin, beta 2                                                                                                           | TUBB2              |
| 202719_s_at | 545     | 356.5   | 1245.4  | 9.5    | 66 | testis derived transcript (3 LIM domains)                                                                                 | TES                |
| 207535_s_at | 658.4   | 446.7   | 721.3   | 6.6    | 65 | nuclear factor of kappa light polypeptide gene enhancer in B-cells 2 (p49/p100)                                           | NFKB2              |
| 208523_x_at | 1864.9  | 1135.7  | 2759    | 62.3   | 65 | histone 1, H2bi                                                                                                           | HIST1H2BI          |
| 210240_s_at | 3675.6  | 1394.4  | 1846.6  | 53.4   | 65 | cyclin-dependent kinase inhibitor 2D (p19, inhibits CDK4)                                                                 | CDKN2D             |

|             |         |         |         |        |    |                                                                                                                                                           |                                 |
|-------------|---------|---------|---------|--------|----|-----------------------------------------------------------------------------------------------------------------------------------------------------------|---------------------------------|
| 216517_at   | 739.8   | 222     | 515.3   | 5.6    | 65 | immunoglobulin kappa constant /// similar to Ig kappa chain                                                                                               | IGKC ///<br>LOC339562           |
| 216066_at   | 391.6   | 229.2   | 542.8   | 11.9   | 65 | ATP-binding cassette, sub-family A (ABC1), member 1                                                                                                       | ABCA1                           |
| 211226_at   | 100.1   | 57.9    | 246.2   | 3.5    | 65 | galanin receptor 2                                                                                                                                        | GALR2                           |
| 204215_at   | 4073.8  | 3830.3  | 3926.3  | 401.2  | 64 | chromosome 7 open reading frame 23                                                                                                                        | C7orf23                         |
| 219341_at   | 430.1   | 138.9   | 707.8   | 4.9    | 64 | ceroid-lipofuscinosis, neuronal 8 (epilepsy, progressive with mental retardation)                                                                         | CLN8                            |
| 220603_s_at | 1196.8  | 787.4   | 1233.3  | 44.1   | 64 | multiple C2-domains with two transmembrane regions 2                                                                                                      | MCTP2                           |
| 201669_s_at | 1969.4  | 891     | 4075.8  | 3.3    | 64 | myristoylated alanine-rich protein kinase C substrate                                                                                                     | MARCKS                          |
| 202819_s_at | 986.9   | 863.2   | 2552.4  | 30.6   | 64 | transcription elongation factor B (SIII), polypeptide 3 (110kDa, elongin A)                                                                               | TCEB3                           |
| 201243_s_at | 300.7   | 171.1   | 474.3   | 8.1    | 64 | ATPase, Na <sup>+</sup> /K <sup>+</sup> transporting, beta 1 polypeptide                                                                                  | ATP1B1                          |
| 209154_at   | 4487.1  | 1728.6  | 2541.9  | 178.4  | 64 | Tax1 (human T-cell leukemia virus type I) binding protein 3                                                                                               | TAX1BP3                         |
| 215946_x_at | 8832.4  | 6771.2  | 13320.6 | 297.3  | 64 | similar to omega protein                                                                                                                                  | LOC91353                        |
| 217179_x_at | 1514.4  | 959     | 1819.1  | 28.8   | 64 | (clone 9F2L) Ig rearranged L-chain mRNA V-region, 5' end                                                                                                  | ---                             |
| 201021_s_at | 1894.7  | 1359.4  | 4252.5  | 62.6   | 64 | destrin (actin depolymerizing factor)                                                                                                                     | DSTN                            |
| 204005_s_at | 231.6   | 143.2   | 471.2   | 1.6    | 64 | PRKC, apoptosis, WT1, regulator                                                                                                                           | PAWR                            |
| 217963_s_at | 1003.1  | 479     | 7490.1  | 17.3   | 64 | nerve growth factor receptor (TNFRSF16) associated protein 1                                                                                              | NGFRAP1                         |
| 201917_s_at | 2035.5  | 1564.9  | 2933.3  | 216.1  | 64 | solute carrier family 25, member 36                                                                                                                       | SLC25A36                        |
| 208490_x_at | 2965.2  | 2315    | 4156.3  | 66.3   | 64 | histone 1, H2bf                                                                                                                                           | HIST1H2BF                       |
| 211868_x_at | 1153.8  | 685.2   | 2705.6  | 16.7   | 64 | immunoglobulin heavy constant alpha 1 ///<br>immunoglobulin heavy constant gamma 1 (G1m marker)<br>/// immunoglobulin heavy constant gamma 3 (G3m marker) | IGHA1 ///<br>IGHG1 ///<br>IGHG3 |
| 206865_at   | 544.2   | 280.4   | 1736.8  | 8.4    | 64 | Harakiri, BCL2 interacting protein (contains only BH3 domain)                                                                                             | HRK                             |
| 202354_s_at | 635.7   | 559.8   | 888.1   | 10.2   | 63 | general transcription factor IIF, polypeptide 1, 74kDa                                                                                                    | GTF2F1                          |
| 203505_at   | 2678.1  | 1046.2  | 2299.6  | 7.7    | 63 | ATP-binding cassette, sub-family A (ABC1), member 1                                                                                                       | ABCA1                           |
| 212574_x_at | 1371.7  | 942.4   | 1732.6  | 23.8   | 63 | chromosome 19 open reading frame 6                                                                                                                        | C19orf6                         |
| 212826_s_at | 19729.1 | 15012.9 | 19642.3 | 1648.1 | 63 | solute carrier family 25 (mitochondrial carrier; adenine nucleotide translocator), member 6                                                               | SLC25A6                         |
| 222024_s_at | 1582.5  | 1143.2  | 5119    | 28.3   | 63 | A kinase (PRKA) anchor protein 13                                                                                                                         | AKAP13                          |
| 202166_s_at | 2057.9  | 1473.3  | 1443    | 170.4  | 63 | protein phosphatase 1, regulatory (inhibitor) subunit 2                                                                                                   | PPP1R2                          |
| 207492_at   | 1232.9  | 853.9   | 975.7   | 44.3   | 63 | N-glycanase 1                                                                                                                                             | NGLY1                           |

|             |         |        |         |       |    |                                                                                           |                    |
|-------------|---------|--------|---------|-------|----|-------------------------------------------------------------------------------------------|--------------------|
| 215777_at   | 634.9   | 229.3  | 19107.3 | 4.6   | 63 | IgV lambda [human, chronic lymphocytic leukemia case P87, mRNA Partial Mutant, 237 nt]    | ---                |
| 205734_s_at | 1450.1  | 47.1   | 593     | 2.8   | 62 | AF4/FMR2 family, member 3                                                                 | AFF3               |
| 208244_at   | 651     | 427.8  | 885.3   | 13.6  | 62 | bone morphogenetic protein 3 (osteogenic)                                                 | BMP3               |
| 208685_x_at | 5013.2  | 3634.6 | 4652.7  | 168.3 | 62 | bromodomain containing 2                                                                  | BRD2               |
| 209020_at   | 3058.3  | 1661.5 | 4878.3  | 377.5 | 62 | chromosome 20 open reading frame 111                                                      | C20orf111          |
| 209761_s_at | 4503.7  | 3048.2 | 3929.8  | 514.6 | 62 | SP110 nuclear body protein                                                                | SP110              |
| 213002_at   | 730.9   | 613.7  | 1010.8  | 24.9  | 62 | Myristoylated alanine-rich protein kinase C substrate                                     | MARCKS             |
| 215785_s_at | 6233.1  | 4436.7 | 6694.4  | 199.8 | 62 | cytoplasmic FMR1 interacting protein 2                                                    | CYFIP2             |
| 216971_s_at | 371.8   | 154.2  | 741.3   | 4.4   | 62 | plectin 1, intermediate filament binding protein 500kDa                                   | PLEC1              |
| 38340_at    | 3343.8  | 2368.3 | 4903.3  | 346.7 | 62 | huntingtin interacting protein-1-related                                                  | HIP1R              |
| 202723_s_at | 6466.6  | 4219.6 | 17277.3 | 134   | 62 | forkhead box O1A (rhabdomyosarcoma)                                                       | FOXO1A             |
| 201235_s_at | 2025.4  | 1288.6 | 2444    | 15.1  | 62 | BTG family, member 2                                                                      | BTG2               |
| 205655_at   | 403.5   | 276.4  | 727.1   | 3.4   | 62 | Mdm4, transformed 3T3 cell double minute 4, p53 binding protein (mouse)                   | MDM4               |
| 219505_at   | 2737.3  | 2243.7 | 4093.5  | 42.1  | 62 | cat eye syndrome chromosome region, candidate 1                                           | CECR1              |
| 215621_s_at | 1006.6  | 621.9  | 5610.5  | 9.2   | 62 | immunoglobulin heavy constant delta                                                       | IGHD               |
| 200790_at   | 8522.6  | 5203   | 11216.3 | 281.2 | 61 | ornithine decarboxylase 1                                                                 | ODC1               |
| 216541_x_at | 892.6   | 313.8  | 927.6   | 7     | 61 | immunoglobulin heavy constant gamma 1 ///<br>immunoglobulin heavy constant gamma 3        | IGHG1 ///<br>IGHG3 |
| 202503_s_at | 11012.2 | 8769.1 | 10879.3 | 475.6 | 61 | KIAA0101                                                                                  | KIAA0101           |
| 204081_at   | 717.2   | 168.4  | 1091.9  | 14.4  | 61 | neurogranin (protein kinase C substrate, RC3)                                             | NRGN               |
| 207838_x_at | 981.8   | 649.4  | 1635    | 10.6  | 61 | pre-B-cell leukemia transcription factor interacting protein 1                            | PBXIP1             |
| 209682_at   | 2478.1  | 1025.2 | 2193.7  | 129.8 | 61 | Cas-Br-M (murine) ecotropic retroviral transforming sequence b                            | CBLB               |
| 202773_s_at | 431.4   | 216.8  | 451.7   | 5.7   | 61 | splicing factor, arginine/serine-rich 8 (suppressor-of-white-apricot homolog, Drosophila) | SFRS8              |
| 214469_at   | 1051.2  | 408.8  | 2077.8  | 6.9   | 61 | histone 1, H2ae                                                                           | HIST1H2AE          |
| 218302_at   | 925.2   | 657.8  | 1130.3  | 10.9  | 61 | presenilin enhancer 2 homolog (C. elegans)                                                | PSENE2             |
| 201688_s_at | 2138.1  | 1206.6 | 7186    | 9     | 61 | tumor protein D52                                                                         | TPD52              |
| 204961_s_at | 2274    | 1590.8 | 2420.1  | 6.6   | 60 | neutrophil cytosolic factor 1 (47kDa, chronic granulomatous disease, autosomal 1)         | NCF1               |
| 208527_x_at | 2428.2  | 1698.4 | 3233.1  | 139.5 | 60 | histone 1, H2be                                                                           | HIST1H2BE          |
| 218280_x_at | 14912.4 | 4785.1 | 11736.4 | 394.9 | 60 | histone 2, H2aa                                                                           | HIST2H2AA          |
| 220085_at   | 1071.5  | 318.2  | 880.2   | 5.2   | 60 | helicase, lymphoid-specific                                                               | HELLS              |
| 215498_s_at | 5844.5  | 3004.3 | 21628.8 | 326.9 | 60 | mitogen-activated protein kinase kinase 3 /// mitogen-activated protein kinase kinase 3   | MAP2K3             |
| 204152_s_at | 1746.6  | 983.2  | 1317.7  | 9.3   | 60 | manic fringe homolog (Drosophila)                                                         | MFNG               |

|             |        |        |         |       |    |                                                                                                                                             |          |
|-------------|--------|--------|---------|-------|----|---------------------------------------------------------------------------------------------------------------------------------------------|----------|
| 204790_at   | 1686.5 | 945.9  | 2070.3  | 17.7  | 60 | SMAD, mothers against DPP homolog 7 (Drosophila)                                                                                            | SMAD7    |
| 210594_x_at | 1508.6 | 819.7  | 1369.8  | 61    | 60 | myelin protein zero-like 1                                                                                                                  | MPZL1    |
| 212587_s_at | 7477.2 | 2952.5 | 8415.8  | 35.6  | 60 | protein tyrosine phosphatase, receptor type, C                                                                                              | PTPRC    |
| 213015_at   | 2233.4 | 966.7  | 1632.3  | 119.4 | 60 | Bobby sox homolog (Drosophila)                                                                                                              | BBX      |
| 215908_at   | 637.4  | 160.6  | 619     | 6.2   | 60 | Membrane-associated ring finger (C3HC4) 6                                                                                                   | MARCH6   |
| 205666_at   | 525.6  | 174.3  | 567.5   | 9.9   | 60 | flavin containing monooxygenase 1                                                                                                           | FMO1     |
| 209760_at   | 6164.9 | 4460.5 | 9469.1  | 632   | 60 | KIAA0922 protein                                                                                                                            | KIAA0922 |
| 212487_at   | 1468.3 | 1046.3 | 1280    | 61.7  | 60 | KIAA0553 protein                                                                                                                            | KIAA0553 |
| 214084_x_at | 2283.5 | 1604.9 | 2794.8  | 21.7  | 60 | neutrophil cytosolic factor 1 (47kDa, chronic granulomatous disease, autosomal 1)                                                           | NCF1     |
| 216300_x_at | 400.9  | 157    | 421     | 6.3   | 60 | retinoic acid receptor, alpha                                                                                                               | RARA     |
| 216503_s_at | 373    | 304.1  | 446.9   | 10    | 60 | myeloid/lymphoid or mixed-lineage leukemia (trithorax homolog, Drosophila); translocated to, 10                                             | MLLT10   |
| 220369_at   | 473.2  | 186.1  | 566.3   | 18.4  | 60 | KIAA2010                                                                                                                                    | KIAA2010 |
| 216853_x_at | 771.7  | 402.8  | 3033.3  | 17.9  | 60 | Immunoglobulin lambda joining 3                                                                                                             | IGLJ3    |
| 209318_x_at | 773.2  | 451.5  | 845.6   | 6.2   | 59 | pleiomorphic adenoma gene-like 1                                                                                                            | PLAGL1   |
| 217184_s_at | 719.1  | 381.7  | 1070.9  | 10.8  | 59 | leukocyte tyrosine kinase                                                                                                                   | LTK      |
| 217975_at   | 407.1  | 252.5  | 1308.6  | 5     | 59 | WW domain binding protein 5                                                                                                                 | WBP5     |
| 201291_s_at | 4378.2 | 1215.3 | 2993.2  | 12.6  | 59 | topoisomerase (DNA) II alpha 170kDa                                                                                                         | TOP2A    |
| 208900_s_at | 2917.2 | 890.6  | 2375.6  | 13.1  | 59 | topoisomerase (DNA) I                                                                                                                       | TOP1     |
| 215224_at   | 345.8  | 184.4  | 398.1   | 7     | 59 | ribosomal protein L23                                                                                                                       | RPL23    |
| 216027_at   | 257.2  | 92.1   | 269.6   | 2.5   | 59 | thioredoxin domain containing 13                                                                                                            | TXNDC13  |
| 202768_at   | 5278.9 | 656.8  | 12292.3 | 16    | 59 | FBJ murine osteosarcoma viral oncogene homolog B                                                                                            | FOSB     |
| 201216_at   | 10786  | 7362.1 | 9271.5  | 913.1 | 59 | endoplasmic reticulum protein 29                                                                                                            | ERP29    |
| 209715_at   | 658.5  | 505.7  | 607     | 27    | 59 | chromobox homolog 5 (HP1 alpha homolog, Drosophila)                                                                                         | CBX5     |
| 221520_s_at | 1580.8 | 714    | 2876.9  | 23.1  | 59 | cell division cycle associated 8                                                                                                            | CDC48    |
| 201690_s_at | 1828.9 | 1315   | 5834.8  | 18.5  | 59 | tumor protein D52                                                                                                                           | TPD52    |
| 201890_at   | 3517.3 | 1900   | 4008    | 18.4  | 58 | ribonucleotide reductase M2 polypeptide                                                                                                     | RRM2     |
| 209204_at   | 276.6  | 190.6  | 497.6   | 7     | 58 | LIM domain only 4                                                                                                                           | LMO4     |
| 215589_at   | 174.9  | 104.6  | 490.4   | 2.4   | 58 | SMAD specific E3 ubiquitin protein ligase 1                                                                                                 | SMURF1   |
| 216054_x_at | 1967   | 1230.6 | 11056.3 | 205   | 58 | myosin, light polypeptide 4, alkali; atrial, embryonic                                                                                      | MYL4     |
| 200917_s_at | 548.2  | 419.2  | 713     | 5.3   | 58 | signal recognition particle receptor ('docking protein')                                                                                    | SRPR     |
| 202332_at   | 2393.6 | 1053.4 | 1876.3  | 54.6  | 58 | casein kinase 1, epsilon                                                                                                                    | CSNK1E   |
| 205548_s_at | 1716.9 | 1128.9 | 3271.5  | 10.1  | 58 | BTG family, member 3                                                                                                                        | BTG3     |
| 205511_at   | 431.6  | 250.6  | 588.5   | 4     | 57 | hypothetical protein FLJ10038                                                                                                               | FLJ10038 |
| 205735_s_at | 350.5  | 129.7  | 531.1   | 5.4   | 57 | AF4/FMR2 family, member 3                                                                                                                   | AFF3     |
| 221234_s_at | 7856.5 | 4916.3 | 9481.1  | 67.1  | 57 | BTB and CNC homology 1, basic leucine zipper transcription factor 2 /// BTB and CNC homology 1, basic leucine zipper transcription factor 2 | BACH2    |

|             |         |         |         |        |    |                                                                                                                   |           |
|-------------|---------|---------|---------|--------|----|-------------------------------------------------------------------------------------------------------------------|-----------|
| 216905_s_at | 170.4   | 52.4    | 353.3   | 2.2    | 57 | suppression of tumorigenicity 14 (colon carcinoma, matriptase, epithin)                                           | ST14      |
| 202340_x_at | 1678.5  | 281.2   | 5316.6  | 16.4   | 57 | nuclear receptor subfamily 4, group A, member 1                                                                   | NR4A1     |
| 215108_x_at | 104.7   | 27.2    | 980.8   | 1      | 57 | trinucleotide repeat containing 9                                                                                 | TNRC9     |
| 220331_at   | 469.3   | 340.8   | 1727.5  | 10.2   | 57 | cytochrome P450, family 46, subfamily A, polypeptide 1                                                            | CYP46A1   |
| 210656_at   | 195.3   | 105.3   | 313     | 2.4    | 57 | embryonic ectoderm development                                                                                    | EED       |
| 210872_x_at | 1054.2  | 636.6   | 910.4   | 15.6   | 57 | growth arrest-specific 7                                                                                          | GAS7      |
| 212430_at   | 3874.3  | 2227.6  | 7014.2  | 368    | 57 | RNA-binding region (RNP1, RRM) containing 1 /// RNA-binding region (RNP1, RRM) containing 1                       | RNPC1     |
| 213517_at   | 1773.3  | 845.4   | 1174.7  | 110.1  | 57 | Poly(rC) binding protein 2                                                                                        | PCBP2     |
| 215925_s_at | 4238.1  | 1888.1  | 4968.5  | 9.1    | 57 | CD72 antigen                                                                                                      | CD72      |
| 203725_at   | 1583.5  | 1262.3  | 6711.6  | 30.6   | 57 | growth arrest and DNA-damage-inducible, alpha                                                                     | GADD45A   |
| 212113_at   | 899.1   | 423.6   | 830.4   | 18.9   | 56 | hypothetical LOC552889                                                                                            | LOC552889 |
| 213502_x_at | 10063.7 | 7408.9  | 8939.7  | 480.7  | 56 | similar to bK246H3.1 (immunoglobulin lambda-like polypeptide 1, pre-B-cell specific)                              | LOC91316  |
| 215078_at   | 455.7   | 188.4   | 853.5   | 4.3    | 56 | superoxide dismutase 2, mitochondrial                                                                             | SOD2      |
| 216969_s_at | 816.1   | 494     | 706.4   | 7.2    | 56 | kinesin family member 22                                                                                          | KIF22     |
| 203290_at   | 583.9   | 388.9   | 21095.6 | 8.8    | 56 | major histocompatibility complex, class II, DQ alpha 1 /// major histocompatibility complex, class II, DQ alpha 1 | HLA-DQA1  |
| 218002_s_at | 198.9   | 94      | 1519.6  | 3.1    | 56 | chemokine (C-X-C motif) ligand 14                                                                                 | CXCL14    |
| 212130_x_at | 31870.8 | 22675.5 | 92658.7 | 4959.1 | 56 | eukaryotic translation initiation factor 1                                                                        | EIF1      |
| 212016_s_at | 2144.1  | 2025.9  | 3775    | 76.9   | 56 | polypyrimidine tract binding protein 1                                                                            | PTBP1     |
| 216997_x_at | 1772.9  | 1068.2  | 5808.1  | 4.3    | 56 | transducin-like enhancer of split 4 (E(sp1) homolog, Drosophila)                                                  | TLE4      |
| 210088_x_at | 1798.2  | 1214.4  | 12113   | 204    | 56 | myosin, light polypeptide 4, alkali; atrial, embryonic                                                            | MYL4      |
| 205347_s_at | 1244.6  | 606     | 5245.4  | 39.6   | 56 | thymosin-like 8                                                                                                   | TMSL8     |
| 201876_at   | 484.2   | 398.4   | 5375.3  | 7.9    | 56 | paraoxonase 2                                                                                                     | PON2      |
| 206459_s_at | 211.3   | 121.1   | 330.1   | 8.5    | 55 | wingless-type MMTV integration site family, member 2B                                                             | WNT2B     |
| 206555_s_at | 2931.4  | 1311.7  | 1416.1  | 161.1  | 55 | THUMP domain containing 1                                                                                         | THUMPD1   |
| 208702_x_at | 2780.2  | 2063.1  | 4542.2  | 112.7  | 55 | amyloid beta (A4) precursor-like protein 2                                                                        | APLP2     |
| 215513_at   | 257.1   | 198.6   | 438.5   | 9      | 55 | hydatidiform mole associated and imprinted                                                                        | HYMAI     |
| 215635_at   | 149.7   | 90.2    | 256.5   | 1.1    | 55 | Phosphodiesterase 8A                                                                                              | PDE8A     |
| 219437_s_at | 1153.5  | 478.4   | 1406    | 14.9   | 55 | ankyrin repeat domain 11                                                                                          | ANKRD11   |
| 208960_s_at | 3772.2  | 1315.2  | 23071.2 | 15.1   | 55 | Kruppel-like factor 6                                                                                             | KLF6      |
| 203037_s_at | 3407.9  | 1492.7  | 5965.9  | 63.7   | 55 | metastasis suppressor 1                                                                                           | MTSS1     |
| 205449_at   | 708.6   | 491.4   | 845.1   | 8      | 55 | SAC3 domain containing 1                                                                                          | SAC3D1    |
| 208615_s_at | 4008.2  | 2618.2  | 3219.2  | 469.2  | 55 | protein tyrosine phosphatase type IVA, member 2                                                                   | PTP4A2    |

|             |         |         |         |        |    |                                                                              |           |
|-------------|---------|---------|---------|--------|----|------------------------------------------------------------------------------|-----------|
| 217591_at   | 922.4   | 388     | 1491    | 11.9   | 55 | SKI-like                                                                     | SKIL      |
| 222238_s_at | 700.1   | 271.8   | 1836.4  | 12.1   | 55 | polymerase (DNA directed), mu                                                | POLM      |
| 218856_at   | 2635.9  | 933.8   | 6067.9  | 16.2   | 55 | tumor necrosis factor receptor superfamily, member 21                        | TNFRSF21  |
| 201996_s_at | 1068.9  | 397.4   | 809.9   | 12.1   | 54 | spen homolog, transcriptional regulator (Drosophila)                         | SPEN      |
| 209069_s_at | 36623.3 | 24646.6 | 44984.8 | 3477.8 | 54 | H3 histone, family 3B (H3.3B)                                                | H3F3B     |
| 209262_s_at | 502.8   | 224.7   | 533.8   | 9.3    | 54 | nuclear receptor subfamily 2, group F, member 6                              | NR2F6     |
| 213730_x_at | 5090.4  | 3880.5  | 4655.5  | 407.8  | 54 | transcription factor 3 (E2A immunoglobulin enhancer binding factors E12/E47) | TCF3      |
| 213742_at   | 887.4   | 515.1   | 1080.7  | 24.7   | 54 | splicing factor, arginine/serine-rich 11                                     | SFRS11    |
| 221586_s_at | 766.3   | 451.4   | 862.6   | 4.3    | 54 | E2F transcription factor 5, p130-binding                                     | E2F5      |
| 209773_s_at | 4102.1  | 2963.2  | 9386.6  | 273.9  | 54 | ribonucleotide reductase M2 polypeptide                                      | RRM2      |
| 205931_s_at | 126.3   | 78.6    | 567.7   | 5.1    | 54 | cAMP responsive element binding protein 5                                    | CREB5     |
| 215223_s_at | 1802.3  | 683.2   | 13374.5 | 24.7   | 54 | superoxide dismutase 2, mitochondrial                                        | SOD2      |
| 212094_at   | 298.8   | 175.7   | 14501.7 | 3.3    | 54 | paternally expressed 10                                                      | PEG10     |
| 204794_at   | 978.6   | 131     | 765.5   | 9.1    | 54 | dual specificity phosphatase 2                                               | DUSP2     |
| 207186_s_at | 3198.9  | 2048.3  | 3694.6  | 175.4  | 54 | fetal Alzheimer antigen                                                      | FALZ      |
| 208515_at   | 273.2   | 147.1   | 314.1   | 2.7    | 54 | histone 1, H2bm                                                              | HIST1H2BM |
| 216278_at   | 693.4   | 224.7   | 773.7   | 8.1    | 54 | KIAA0256 gene product                                                        | KIAA0256  |
| 201689_s_at | 1240    | 836.8   | 3977.5  | 5.6    | 54 | tumor protein D52                                                            | TPD52     |
| 208547_at   | 214.9   | 70.7    | 717.9   | 4.1    | 54 | histone 1, H2bb                                                              | HIST1H2BB |
| 202021_x_at | 31691.4 | 21494.7 | 85265.8 | 4111   | 54 | eukaryotic translation initiation factor 1                                   | EIF1      |
| 211789_s_at | 1245.2  | 392.4   | 2084.4  | 3.9    | 54 | MondoA                                                                       | MONDOA    |
| 216211_at   | 706.9   | 446.7   | 969.5   | 4.1    | 54 | Chromosome 10 open reading frame 18                                          | C10orf18  |
| 216855_s_at | 762.9   | 453.7   | 745.5   | 9.6    | 54 | heterogeneous nuclear ribonucleoprotein U (scaffold attachment factor A)     | HNRPU     |
| 217729_s_at | 4929.7  | 2647.3  | 3119.9  | 82.2   | 54 | amino-terminal enhancer of split                                             | AES       |
| 205398_s_at | 853.6   | 471.2   | 2255.6  | 15.6   | 54 | SMAD, mothers against DPP homolog 3 (Drosophila)                             | SMAD3     |
| 219582_at   | 1125.1  | 657.8   | 2626.9  | 26     | 54 | opioid growth factor receptor-like 1                                         | OGFRL1    |
| 221658_s_at | 346.4   | 188.1   | 872.7   | 10.9   | 54 | interleukin 21 receptor                                                      | IL21R     |
| 201101_s_at | 3208.5  | 2063.6  | 5635    | 67     | 53 | BCL2-associated transcription factor 1                                       | BCLAF1    |
| 209759_s_at | 615.2   | 547.2   | 916.5   | 19.2   | 53 | dodecenoyl-Coenzyme A delta isomerase (3,2 trans-enoyl-Coenzyme A isomerase) | DCI       |
| 213134_x_at | 2196    | 1367.7  | 3628.9  | 34.2   | 53 | BTG family, member 3                                                         | BTG3      |
| 213973_at   | 550.6   | 326.5   | 905.3   | 23     | 53 | ribosome binding protein 1 homolog 180kDa (dog)                              | RRBP1     |
| 218247_s_at | 1742.4  | 1256.3  | 2236.9  | 23.3   | 53 | ring finger and KH domain containing 2                                       | RKHD2     |
| 220084_at   | 64.6    | 18.9    | 377.2   | 0.9    | 53 | chromosome 14 open reading frame 105                                         | C14orf105 |
| 205020_s_at | 673.7   | 395.9   | 7567.1  | 10.8   | 53 | ADP-ribosylation factor-like 4                                               | ARL4      |
| 203431_s_at | 811.1   | 664     | 1444.9  | 5      | 53 | Rho GTPase-activating protein                                                | RICS      |
| 203647_s_at | 1905.8  | 1751.4  | 2621.7  | 99.7   | 53 | ferredoxin 1                                                                 | FDX1      |



|             |         |         |         |       |    |                                                                                         |          |
|-------------|---------|---------|---------|-------|----|-----------------------------------------------------------------------------------------|----------|
| 206967_at   | 509.1   | 418.5   | 824.2   | 16.3  | 53 | cyclin T1                                                                               | CCNT1    |
| 211067_s_at | 1610.4  | 1150.4  | 2029.1  | 14.7  | 53 | growth arrest-specific 7 /// growth arrest-specific 7                                   | GAS7     |
| 219079_at   | 1986.5  | 1349.2  | 2656.5  | 282.9 | 53 | cytochrome b5 reductase 4                                                               | CYB5R4   |
| 200796_s_at | 824.2   | 351.7   | 2316.3  | 7.2   | 53 | myeloid cell leukemia sequence 1 (BCL2-related)                                         | MCL1     |
| 206885_x_at | 754.9   | 476.8   | 2066.3  | 16.3  | 53 | growth hormone 1                                                                        | GH1      |
| 215499_at   | 3466.8  | 2239.5  | 12058.5 | 356.5 | 53 | mitogen-activated protein kinase kinase 3 /// mitogen-activated protein kinase kinase 3 | MAP2K3   |
| 209774_x_at | 167.5   | 75.2    | 481.9   | 5.5   | 53 | chemokine (C-X-C motif) ligand 2                                                        | CXCL2    |
| 210830_s_at | 331     | 242.4   | 5046.2  | 7.2   | 53 | paraoxonase 2                                                                           | PON2     |
| 208580_x_at | 822     | 213.3   | 1069.5  | 7.8   | 53 | histone 1, H4k /// histone 1, H4j                                                       | HIST1H4J |
| 210450_at   | 1833.4  | 612.6   | 1191.4  | 5.2   | 53 | hypothetical protein LOC90925                                                           | LOC90925 |
| 213649_at   | 5388.1  | 2999.2  | 6475.2  | 472.9 | 53 | splicing factor, arginine/serine-rich 7, 35kDa                                          | SFRS7    |
| 220012_at   | 781.5   | 388.1   | 895     | 12.3  | 53 | ERO1-like beta ( <i>S. cerevisiae</i> )                                                 | ERO1LB   |
| 201502_s_at | 17163.8 | 10773.5 | 46569.3 | 853.9 | 53 | nuclear factor of kappa light polypeptide gene enhancer in B-cells inhibitor, alpha     | NFKBIA   |
| 202818_s_at | 1643    | 1085.6  | 4783.7  | 230.2 | 53 | transcription elongation factor B (SIII), polypeptide 3 (110kDa, elongin A)             | TCEB3    |
| 214007_s_at | 517.6   | 394.4   | 1224.7  | 16.4  | 53 | PTK9 protein tyrosine kinase 9                                                          | PTK9     |
| 219057_at   | 364     | 227.5   | 767.7   | 21.2  | 53 | rabaptin, RAB GTPase binding effector protein 2                                         | RABEP2   |
| 213566_at   | 684.1   | 410.2   | 4352.6  | 6.8   | 53 | ribonuclease, RNase A family, k6 /// ribonuclease, RNase A family, k6                   | RNASE6   |
| 201242_s_at | 194.3   | 113.3   | 318.9   | 2     | 52 | ATPase, Na <sup>+</sup> /K <sup>+</sup> transporting, beta 1 polypeptide                | ATP1B1   |
| 213042_s_at | 1042.3  | 539.7   | 1179.2  | 4.5   | 52 | ATPase, Ca <sup>++</sup> transporting, ubiquitous                                       | ATP2A3   |
| 214095_at   | 257.5   | 138.9   | 356.9   | 7.2   | 52 | serine hydroxymethyltransferase 2 (mitochondrial)                                       | SHMT2    |
| 219555_s_at | 830     | 381.5   | 1573.2  | 14    | 52 | uncharacterized bone marrow protein BM039                                               | BM039    |
| 217276_x_at | 863.2   | 308.8   | 1969.2  | 9.4   | 52 | serine hydrolase-like 2                                                                 | SERHL2   |
| 204141_at   | 1257.3  | 269.4   | 15893   | 2.8   | 52 | tubulin, beta 2                                                                         | TUBB2    |
| 203504_s_at | 1918.4  | 1199.3  | 2847.2  | 124.2 | 52 | ATP-binding cassette, sub-family A (ABC1), member 1                                     | ABCA1    |
| 208930_s_at | 2787.7  | 728.6   | 3337.9  | 10.9  | 52 | interleukin enhancer binding factor 3, 90kDa                                            | ILF3     |
| 209088_s_at | 1844.7  | 948.9   | 2377.1  | 140.9 | 52 | ubiquitin 1                                                                             | UBN1     |
| 211899_s_at | 588.9   | 278.8   | 1062.4  | 11.9  | 52 | TNF receptor-associated factor 4                                                        | TRAF4    |
| 214308_s_at | 241.8   | 183.2   | 350.9   | 11.2  | 52 | homogentisate 1,2-dioxygenase (homogentisate oxidase)                                   | HGD      |
| 219179_at   | 562.2   | 418     | 933.6   | 4.7   | 52 | dapper, antagonist of beta-catenin, homolog 1 ( <i>Xenopus laevis</i> )                 | DACT1    |
| 213345_at   | 540.7   | 335.9   | 1086.5  | 12.4  | 52 | nuclear factor of activated T-cells, cytoplasmic, calcineurin-dependent 4               | NFATC4   |
| 216248_s_at | 910.5   | 287.2   | 10463.2 | 5     | 52 | nuclear receptor subfamily 4, group A, member 2                                         | NR4A2    |
| 210395_x_at | 2016.7  | 1139    | 13375.5 | 213.8 | 52 | myosin, light polypeptide 4, alkali; atrial, embryonic                                  | MYL4     |

|             |        |        |         |       |    |                                                                                                                                                                                               |                                                  |
|-------------|--------|--------|---------|-------|----|-----------------------------------------------------------------------------------------------------------------------------------------------------------------------------------------------|--------------------------------------------------|
| 211138_s_at | 1347.3 | 650.6  | 2154.6  | 40.2  | 51 | kynurenine 3-monooxygenase (kynurenine 3-hydroxylase)                                                                                                                                         | KMO                                              |
| 215392_at   | 411.6  | 224.1  | 466     | 1.2   | 51 | Multiple inositol polyphosphate histidine phosphatase, 1                                                                                                                                      | MINPP1                                           |
| 215623_x_at | 607.6  | 323.7  | 813.1   | 5.5   | 51 | SMC4 structural maintenance of chromosomes 4-like 1 (yeast)                                                                                                                                   | SMC4L1                                           |
| 218033_s_at | 461.4  | 291.7  | 498.6   | 14.3  | 51 | stannin                                                                                                                                                                                       | SNN                                              |
| 214464_at   | 199.1  | 35.8   | 733.4   | 2.9   | 51 | CDC42 binding protein kinase alpha (DMPK-like)                                                                                                                                                | CDC42BPA                                         |
| 216373_at   | 190.6  | 96.3   | 404.2   | 1.2   | 51 | Hypothetical protein FLJ90013                                                                                                                                                                 | FLJ90013                                         |
| 200712_s_at | 2609.1 | 2080.3 | 3286.1  | 434.4 | 51 | microtubule-associated protein, RP/EB family, member 1                                                                                                                                        | MAPRE1                                           |
| 203919_at   | 814.8  | 488.1  | 776.7   | 5.8   | 51 | transcription elongation factor A (SII), 2                                                                                                                                                    | TCEA2                                            |
| 209750_at   | 673.3  | 407.6  | 807.5   | 22.5  | 51 | nuclear receptor subfamily 1, group D, member 2                                                                                                                                               | NR1D2                                            |
| 212774_at   | 5871.1 | 4225.9 | 6384.8  | 284.6 | 51 | zinc finger protein 238                                                                                                                                                                       | ZNF238                                           |
| 218260_at   | 865.6  | 711.8  | 2892    | 20.5  | 51 | cross-immune reaction antigen PCIA1                                                                                                                                                           | PCIA1                                            |
| 205671_s_at | 689    | 503.6  | 2229.6  | 8.3   | 51 | major histocompatibility complex, class II, DO beta                                                                                                                                           | HLA-DOB                                          |
| 201846_s_at | 2714   | 1876.5 | 4890.4  | 179.1 | 51 | RING1 and YY1 binding protein                                                                                                                                                                 | RYBP                                             |
| 202076_at   | 2724   | 2258.9 | 4525.3  | 417.2 | 51 | baculoviral IAP repeat-containing 2                                                                                                                                                           | BIRC2                                            |
| 202782_s_at | 2320.6 | 1102   | 1432.9  | 118.5 | 51 | skeletal muscle and kidney enriched inositol phosphatase                                                                                                                                      | SKIP                                             |
| 208077_at   | 930.8  | 569.3  | 1293.3  | 14.6  | 51 | chromosome 9 open reading frame 38                                                                                                                                                            | C9orf38                                          |
| 215188_at   | 589.7  | 221    | 424.2   | 4.9   | 51 | serine/threonine kinase 24 (STE20 homolog, yeast)                                                                                                                                             | STK24                                            |
| 218811_at   | 699.2  | 349.3  | 916.1   | 7.5   | 51 | chromosome 7 open reading frame 19                                                                                                                                                            | C7orf19                                          |
| 220937_s_at | 1450   | 620.9  | 2138.9  | 14.3  | 51 | ST6 (alpha-N-acetyl-neuraminyl-2,3-beta-galactosyl-1,3)-N-acetylgalactosaminide alpha-2,6-sialyltransferase 4                                                                                 | ST6GALNAC4                                       |
| 203243_s_at | 262.6  | 108.2  | 615.8   | 1.5   | 51 | PDZ and LIM domain 5                                                                                                                                                                          | PDLIM5                                           |
| 221551_x_at | 987.7  | 682.4  | 2015.3  | 21.6  | 51 | ST6 (alpha-N-acetyl-neuraminyl-2,3-beta-galactosyl-1,3)-N-acetylgalactosaminide alpha-2,6-sialyltransferase 4                                                                                 | ST6GALNAC4                                       |
| 217234_s_at | 7979   | 3102   | 19092.8 | 29.1  | 51 | villin 2 (ezrin)                                                                                                                                                                              | VIL2                                             |
| 208069_x_at | 577.9  | 384.2  | 1644.2  | 10.1  | 51 | chorionic somatomammotropin hormone 1 (placental lactogen) /// chorionic somatomammotropin hormone 2 /// chorionic somatomammotropin hormone-like 1 /// growth hormone 1 /// growth hormone 2 | CSH1 ///<br>CSH2 ///<br>CSHL1 ///<br>GH1 /// GH2 |
| 200648_s_at | 1761.8 | 951.5  | 5262.9  | 3     | 51 | glutamate-ammonia ligase (glutamine synthetase)                                                                                                                                               | GLUL                                             |
| 210889_s_at | 343.6  | 180    | 1849.1  | 7.1   | 51 | Fc fragment of IgG, low affinity IIb, receptor (CD32)                                                                                                                                         | FCGR2B                                           |
| 203628_at   | 410.3  | 208.3  | 1386.3  | 5.2   | 51 | insulin-like growth factor 1 receptor                                                                                                                                                         | IGF1R                                            |
| 201793_x_at | 690.1  | 311.4  | 855.6   | 12.2  | 50 | chromosome 1 open reading frame 16                                                                                                                                                            | C1orf16                                          |
| 215357_s_at | 706.9  | 619    | 983.5   | 23.8  | 50 | polymerase (DNA-directed), delta interacting protein 3                                                                                                                                        | POLDIP3                                          |

|             |        |        |         |       |    |                                                                                                      |                   |
|-------------|--------|--------|---------|-------|----|------------------------------------------------------------------------------------------------------|-------------------|
| 201925_s_at | 1190.3 | 834.1  | 2621.5  | 29    | 50 | decay accelerating factor for complement (CD55, Cromer blood group system)                           | DAF               |
| 213747_at   | 217.4  | 155.9  | 505.8   | 5.6   | 50 | ---                                                                                                  | ---               |
| 213122_at   | 1063.7 | 507    | 4660.5  | 12.5  | 50 | TSPY-like 5                                                                                          | TSPYL5            |
| 200783_s_at | 3283.3 | 2555.7 | 3636.6  | 276.3 | 50 | stathmin 1/oncoprotein 18                                                                            | STMN1             |
| 209713_s_at | 309.2  | 247.8  | 624.8   | 8.5   | 50 | solute carrier family 35 (UDP-glucuronic acid/UDP-N-acetylgalactosamine dual transporter), member D1 | SLC35D1           |
| 206675_s_at | 117.8  | 82.7   | 259.1   | 2     | 50 | SKI-like                                                                                             | SKIL              |
| 205397_x_at | 380.7  | 98.7   | 1241    | 10.8  | 50 | SMAD, mothers against DPP homolog 3 (Drosophila)                                                     | SMAD3             |
| 209151_x_at | 1522.5 | 934.4  | 1986    | 8     | 50 | transcription factor 3 (E2A immunoglobulin enhancer binding factors E12/E47)                         | TCF3              |
| 218724_s_at | 1079.1 | 581.3  | 1009.7  | 20.5  | 50 | TGFB-induced factor 2 (TALE family homeobox)                                                         | TGIF2             |
| 219990_at   | 521.6  | 393.4  | 1001    | 5.4   | 50 | E2F transcription factor 8                                                                           | E2F8              |
| 216412_x_at | 475    | 198.6  | 1291.7  | 9.7   | 50 | Clone ds1-1 immunoglobulin lambda chain VJ region, (IGL)                                             | ---               |
| 202393_s_at | 3382   | 1512.9 | 8593.5  | 160.2 | 50 | Kruppel-like factor 10                                                                               | KLF10             |
| 214826_at   | 216.5  | 166.3  | 473.3   | 6     | 50 | 2'-phosphodiesterase                                                                                 | 2'-PDE            |
| 202464_s_at | 625.6  | 494.3  | 4013.6  | 9     | 50 | 6-phosphofructo-2-kinase/fructose-2,6-biphosphatase 3                                                | PFKFB3            |
| 206195_x_at | 230    | 164.5  | 436.5   | 8.5   | 49 | growth hormone 2                                                                                     | GH2               |
| 210448_s_at | 6937.5 | 1830   | 13603.4 | 33.3  | 49 | purinergic receptor P2X, ligand-gated ion channel, 5                                                 | P2RX5             |
| 214516_at   | 260    | 99.8   | 440.2   | 4.6   | 49 | histone 1, H4b                                                                                       | HIST1H4B          |
| 207106_s_at | 519.4  | 285.3  | 1063.1  | 6.8   | 49 | leukocyte tyrosine kinase                                                                            | LTK               |
| 208046_at   | 274    | 104.8  | 701.7   | 7.9   | 49 | histone 1, H4a                                                                                       | HIST1H4A          |
| 215284_at   | 406.3  | 296.3  | 1224.3  | 7.9   | 49 | Sorting nexin 9                                                                                      | SNX9              |
| 204285_s_at | 3741   | 3031.1 | 25815.9 | 127.7 | 49 | phorbol-12-myristate-13-acetate-induced protein 1                                                    | PMAIP1            |
| 201499_s_at | 6299   | 4419.1 | 7502.7  | 892.6 | 49 | ubiquitin specific peptidase 7 (herpes virus-associated)                                             | USP7              |
| 202240_at   | 964.4  | 607.7  | 1358.9  | 23.8  | 49 | polo-like kinase 1 (Drosophila)                                                                      | PLK1              |
| 213887_s_at | 1776   | 1213.9 | 1430.7  | 56.8  | 49 | polymerase (RNA) II (DNA directed) polypeptide E, 25kDa                                              | POLR2E            |
| 214056_at   | 550.7  | 294.7  | 690.3   | 7.3   | 49 | Myeloid cell leukemia sequence 1 (BCL2-related)                                                      | MCL1              |
| 217230_at   | 471.6  | 59.2   | 695.4   | 7     | 49 | villin 2 (ezrin)                                                                                     | VIL2              |
| 203391_at   | 497.4  | 170.6  | 1012.4  | 17.2  | 49 | FK506 binding protein 2, 13kDa                                                                       | FKBP2             |
| 219681_s_at | 487.9  | 328.9  | 1101    | 4.4   | 49 | RAB11 family interacting protein 1 (class I)                                                         | RAB11FIP1         |
| 210387_at   | 3080.5 | 1587.3 | 7883.1  | 12.2  | 49 | histone 1, H2bg                                                                                      | HIST1H2BG         |
| 219839_x_at | 442.9  | 211.3  | 1486.8  | 7.6   | 49 | T-cell leukemia/lymphoma 1B /// T-cell leukemia/lymphoma 6                                           | TCL1B ///<br>TCL6 |
| 206413_s_at | 1611.3 | 892.6  | 34444.7 | 23.8  | 49 | T-cell leukemia/lymphoma 1B /// T-cell leukemia/lymphoma 6                                           | TCL1B ///<br>TCL6 |

|             |         |        |         |       |    |                                                                                                                                                       |                    |
|-------------|---------|--------|---------|-------|----|-------------------------------------------------------------------------------------------------------------------------------------------------------|--------------------|
| 208546_x_at | 1652.9  | 954.3  | 1981.3  | 32.4  | 49 | histone 1, H2bh                                                                                                                                       | HIST1H2BH          |
| 209753_s_at | 1802.8  | 1211.1 | 2265.4  | 188.5 | 49 | thymopoietin                                                                                                                                          | TMPO               |
| 214712_at   | 364     | 86.8   | 327.1   | 1.6   | 49 | ---                                                                                                                                                   | ---                |
| 216207_x_at | 4775.2  | 3222.6 | 9161.2  | 398.9 | 49 | immunoglobulin kappa variable 1D-13                                                                                                                   | IGKV1D-13          |
| 219961_s_at | 434.9   | 261.5  | 641.1   | 16.1  | 49 | chromosome 20 open reading frame 19                                                                                                                   | C20orf19           |
| 220987_s_at | 1908.9  | 838.2  | 1462.1  | 109.5 | 49 | chromosome 11 open reading frame 17 /// chromosome 11 open reading frame 17 /// NUAK family, SNF1-like kinase, 2 /// NUAK family, SNF1-like kinase, 2 | C11orf17 /// NUAK2 |
| 219659_at   | 126.6   | 72.7   | 996.1   | 5.9   | 49 | ATPase, aminophospholipid transporter-like, Class I, type 8A, member 2                                                                                | ATP8A2             |
| 202379_s_at | 5195.1  | 2436.4 | 4839.2  | 148.8 | 48 | natural killer-tumor recognition sequence                                                                                                             | NKTR               |
| 210791_s_at | 793     | 342.6  | 1070.1  | 8.1   | 48 | Rho GTPase-activating protein                                                                                                                         | RICS               |
| 212665_at   | 1742.4  | 925.9  | 2080.5  | 229.1 | 48 | TCDD-inducible poly(ADP-ribose) polymerase                                                                                                            | TIPARP             |
| 206660_at   | 14361.7 | 8315   | 29213.3 | 26.9  | 48 | immunoglobulin lambda-like polypeptide 1                                                                                                              | IGLL1              |
| 220400_at   | 220.9   | 123.3  | 457.5   | 5.5   | 48 | vacuolar protein sorting 13B (yeast)                                                                                                                  | VPS13B             |
| 202014_at   | 2765    | 1272.3 | 17225.8 | 37.9  | 48 | protein phosphatase 1, regulatory (inhibitor) subunit 15A                                                                                             | PPP1R15A           |
| 212611_at   | 1669.7  | 1156.8 | 8728.6  | 150.2 | 48 | deltex 4 homolog (Drosophila)                                                                                                                         | DTX4               |
| 205769_at   | 310.3   | 192.6  | 1536.6  | 4.7   | 48 | solute carrier family 27 (fatty acid transporter), member 2                                                                                           | SLC27A2            |
| 209269_s_at | 1196.2  | 890    | 1180.9  | 131.4 | 48 | Spleen tyrosine kinase                                                                                                                                | SYK                |
| 209469_at   | 217.3   | 34     | 256.4   | 2.1   | 48 | glycoprotein M6A                                                                                                                                      | GPM6A              |
| 213939_s_at | 619.7   | 451.4  | 1008    | 6.7   | 48 | rap2 interacting protein x                                                                                                                            | RIPX               |
| 215338_s_at | 1640.9  | 956.8  | 1577.3  | 16.6  | 48 | natural killer-tumor recognition sequence                                                                                                             | NKTR               |
| 216645_at   | 600.6   | 427.4  | 745.3   | 24.2  | 48 | ---                                                                                                                                                   | ---                |
| 219340_s_at | 689.7   | 323.6  | 994.5   | 9.6   | 48 | ceroid-lipofuscinosis, neuronal 8 (epilepsy, progressive with mental retardation)                                                                     | CLN8               |
| 221004_s_at | 3633.1  | 1929.3 | 6469.8  | 15.2  | 48 | integral membrane protein 2C /// integral membrane protein 2C                                                                                         | ITM2C              |
| 206665_s_at | 477.7   | 197.9  | 4662.1  | 3.4   | 48 | BCL2-like 1                                                                                                                                           | BCL2L1             |
| 206255_at   | 1042.3  | 700    | 3332.5  | 7.8   | 48 | B lymphoid tyrosine kinase                                                                                                                            | BLK                |
| 202208_s_at | 548.3   | 385.1  | 2457.6  | 10.6  | 48 | ADP-ribosylation factor-like 7                                                                                                                        | ARL7               |
| 201236_s_at | 5477.4  | 4515.7 | 4123.8  | 551.1 | 47 | BTG family, member 2                                                                                                                                  | BTG2               |
| 207002_s_at | 378.3   | 188.2  | 433.3   | 2     | 47 | pleiomorphic adenoma gene-like 1                                                                                                                      | PLAGL1             |
| 207798_s_at | 201.9   | 76     | 526.5   | 2.7   | 47 | ataxin 2-like                                                                                                                                         | ATXN2L             |
| 214554_at   | 396.1   | 163.7  | 871.2   | 3.2   | 47 | histone 1, H2al                                                                                                                                       | HIST1H2AL          |
| 220001_at   | 284.9   | 175.2  | 4940.2  | 8     | 47 | peptidyl arginine deiminase, type IV                                                                                                                  | PADI4              |
| 212457_at   | 667.9   | 310.9  | 1110    | 18.1  | 47 | transcription factor binding to IGHM enhancer 3                                                                                                       | TFE3               |
| 213061_s_at | 953.9   | 821.8  | 1418.2  | 114.7 | 47 | N-terminal asparagine amidase                                                                                                                         | NTAN1              |

|             |        |         |         |        |    |                                                                                                                                                                                                                                                                                                                                                                        |                                          |
|-------------|--------|---------|---------|--------|----|------------------------------------------------------------------------------------------------------------------------------------------------------------------------------------------------------------------------------------------------------------------------------------------------------------------------------------------------------------------------|------------------------------------------|
| 218529_at   | 515.8  | 310.3   | 522.9   | 27.8   | 47 | CD320 antigen                                                                                                                                                                                                                                                                                                                                                          | CD320                                    |
| 202871_at   | 481.2  | 246.6   | 1360.7  | 14.4   | 47 | TNF receptor-associated factor 4                                                                                                                                                                                                                                                                                                                                       | TRAF4                                    |
| 215891_s_at | 318.1  | 138.6   | 781.1   | 5.9    | 47 | GM2 ganglioside activator                                                                                                                                                                                                                                                                                                                                              | GM2A                                     |
| 215200_x_at | 1026.2 | 273.1   | 4081.9  | 12.7   | 47 | Villin 2 (ezrin)                                                                                                                                                                                                                                                                                                                                                       | VIL2                                     |
| 206342_x_at | 481.2  | 311.1   | 3521.6  | 8.3    | 47 | iduronate 2-sulfatase (Hunter syndrome)                                                                                                                                                                                                                                                                                                                                | IDS                                      |
| 202479_s_at | 707.8  | 486.7   | 5353.1  | 9.3    | 47 | tribbles homolog 2 (Drosophila)                                                                                                                                                                                                                                                                                                                                        | TRIB2                                    |
| 217849_s_at | 141.2  | 44      | 919.4   | 3.9    | 47 | CDC42 binding protein kinase beta (DMPK-like)                                                                                                                                                                                                                                                                                                                          | CDC42BPB                                 |
| 210506_at   | 134.1  | 84.3    | 855.2   | 5.1    | 47 | fucosyltransferase 7 (alpha (1,3) fucosyltransferase)                                                                                                                                                                                                                                                                                                                  | FUT7                                     |
| 205023_at   | 205.3  | 58.5    | 370.3   | 4.3    | 47 | RAD51 homolog (RecA homolog, E. coli) (S. cerevisiae)                                                                                                                                                                                                                                                                                                                  | RAD51                                    |
| 206632_s_at | 937.4  | 353     | 856.9   | 2.9    | 47 | apolipoprotein B mRNA editing enzyme, catalytic polypeptide-like 3B                                                                                                                                                                                                                                                                                                    | APOBEC3B                                 |
| 211947_s_at | 1169   | 170.5   | 1508.8  | 10.9   | 47 | BAT2 domain containing 1                                                                                                                                                                                                                                                                                                                                               | BAT2D1                                   |
| 206314_at   | 158.9  | 90      | 323.8   | 4.4    | 47 | zinc finger protein 167                                                                                                                                                                                                                                                                                                                                                | ZNF167                                   |
| 219313_at   | 154.4  | 116.7   | 380.8   | 4.8    | 47 | hypothetical protein DKFZp434C0328                                                                                                                                                                                                                                                                                                                                     | DKFZp434C0328                            |
| 205544_s_at | 215.9  | 129     | 5833.9  | 10.1   | 47 | complement component (3d/Epstein Barr virus) receptor 2                                                                                                                                                                                                                                                                                                                | CR2                                      |
| 206951_at   | 606.2  | 340.8   | 663.5   | 12.3   | 46 | histone 1, H4e                                                                                                                                                                                                                                                                                                                                                         | HIST1H4E                                 |
| 212620_at   | 509.8  | 199.8   | 1165.4  | 15     | 46 | zinc finger protein 609                                                                                                                                                                                                                                                                                                                                                | ZNF609                                   |
| 212240_s_at | 2426.9 | 1923.9  | 8975.2  | 277.2  | 46 | phosphoinositide-3-kinase, regulatory subunit 1 (p85 alpha)                                                                                                                                                                                                                                                                                                            | PIK3R1                                   |
| 205425_at   | 861.5  | 365.5   | 1018.8  | 4.3    | 46 | huntingtin interacting protein 1                                                                                                                                                                                                                                                                                                                                       | HIP1                                     |
| 217390_x_at | 755    | 553.5   | 779.3   | 23.7   | 46 | ---                                                                                                                                                                                                                                                                                                                                                                    | ---                                      |
| 220609_at   | 617    | 260.1   | 601.4   | 4.7    | 46 | hypothetical protein LOC202181                                                                                                                                                                                                                                                                                                                                         | LOC202181                                |
| 221491_x_at | 1553.3 | 699.6   | 2570    | 2.5    | 46 | major histocompatibility complex, class II, DR beta 1 ///<br>major histocompatibility complex, class II, DR beta 1 ///<br>major histocompatibility complex, class II, DR beta 3 ///<br>major histocompatibility complex, class II, DR beta 3 ///<br>major histocompatibility complex, class II, DR beta 4 ///<br>major histocompatibility complex, class II, DR beta 4 | HLA-DRB1 ///<br>HLA-DRB3 ///<br>HLA-DRB4 |
| 217536_x_at | 136.5  | 46.7    | 276.9   | 0.9    | 46 | ---                                                                                                                                                                                                                                                                                                                                                                    | ---                                      |
| 212227_x_at | 30362  | 21224.4 | 93725.6 | 4332.2 | 46 | eukaryotic translation initiation factor 1                                                                                                                                                                                                                                                                                                                             | EIF1                                     |
| 205922_at   | 313.3  | 65.8    | 1335.5  | 6.8    | 46 | vanin 2 /// vanin 2                                                                                                                                                                                                                                                                                                                                                    | VNN2                                     |
| 204684_at   | 476.7  | 190.9   | 3423.4  | 8.5    | 46 | neuronal pentraxin I                                                                                                                                                                                                                                                                                                                                                   | NPTX1                                    |
| 214786_at   | 427.6  | 294.4   | 1480.2  | 7.1    | 46 | mitogen-activated protein kinase kinase kinase 1                                                                                                                                                                                                                                                                                                                       | MAP3K1                                   |
| 215721_at   | 375.9  | 288.8   | 1301.2  | 5.2    | 46 | immunoglobulin heavy constant gamma 1 (G1m marker)                                                                                                                                                                                                                                                                                                                     | IGHG1                                    |

|             |        |        |         |        |    |                                                                                               |           |
|-------------|--------|--------|---------|--------|----|-----------------------------------------------------------------------------------------------|-----------|
| 205768_s_at | 175.3  | 98.1   | 836.9   | 3.6    | 46 | solute carrier family 27 (fatty acid transporter), member 2                                   | SLC27A2   |
| 201397_at   | 1061.9 | 740.9  | 1765.5  | 23.8   | 46 | phosphoglycerate dehydrogenase                                                                | PHGDH     |
| 211022_s_at | 375.1  | 227.3  | 427.8   | 6.7    | 46 | alpha thalassemia/mental retardation syndrome X-linked (RAD54 homolog, <i>S. cerevisiae</i> ) | ATRX      |
| 220797_at   | 216.3  | 169.9  | 429.9   | 3.8    | 46 | hypothetical protein MGC3329                                                                  | MGC3329   |
| 208705_s_at | 6796.1 | 6040.4 | 20022   | 1065.6 | 46 | eukaryotic translation initiation factor 5                                                    | EIF5      |
| 213780_at   | 134.2  | 77.1   | 476.5   | 5.7    | 46 | Full-length cDNA clone CS0DI027YJ05 of Placenta Cot 25-normalized of Homo sapiens (human)     | ---       |
| 216456_at   | 667.5  | 279    | 2544.7  | 3.1    | 46 | Protocadherin 9                                                                               | PCDH9     |
| 37028_at    | 5364.5 | 1966.1 | 20132.4 | 281    | 46 | protein phosphatase 1, regulatory (inhibitor) subunit 15A                                     | PPP1R15A  |
| 219855_at   | 691.1  | 115.1  | 1950.7  | 15     | 46 | nudix (nucleoside diphosphate linked moiety X)-type motif 11                                  | NUDT11    |
| 201411_s_at | 805.9  | 399.3  | 863.9   | 7.5    | 45 | pleckstrin homology domain containing, family B (evectins) member 2                           | PLEKHB2   |
| 201926_s_at | 1353.7 | 877.4  | 2551.7  | 26.8   | 45 | decay accelerating factor for complement (CD55, Cromer blood group system)                    | DAF       |
| 202095_s_at | 1357.7 | 1007.1 | 2523.9  | 21.7   | 45 | baculoviral IAP repeat-containing 5 (survivin)                                                | BIRC5     |
| 207904_s_at | 448.8  | 304.7  | 583.5   | 9.7    | 45 | leucyl/cystinyl aminopeptidase                                                                | LNPEP     |
| 211865_s_at | 349.3  | 223.2  | 651.6   | 6.6    | 45 | fizzy/cell division cycle 20 related 1 ( <i>Drosophila</i> )                                  | FZR1      |
| 213281_at   | 841.7  | 540.7  | 984.3   | 28.2   | 45 | ---                                                                                           | ---       |
| 214108_at   | 510.5  | 345.5  | 990.6   | 23.5   | 45 | MYC associated factor X                                                                       | MAX       |
| 219709_x_at | 423    | 326.4  | 666.2   | 6.8    | 45 | chromosome 16 open reading frame 24                                                           | C16orf24  |
| 219996_at   | 424    | 247.1  | 427.5   | 7.9    | 45 | ankyrin repeat and SOCS box-containing 7                                                      | ASB7      |
| 220220_at   | 321.7  | 221.7  | 595.8   | 3.4    | 45 | hypothetical protein FLJ10120                                                                 | FLJ10120  |
| 222263_at   | 512.1  | 304.2  | 770.4   | 17.1   | 45 | solute carrier family 35, member E1                                                           | SLC35E1   |
| 209193_at   | 3851.9 | 2313.1 | 9601.8  | 305.9  | 45 | pim-1 oncogene /// pim-1 oncogene                                                             | PIM1      |
| 208786_s_at | 5397.9 | 3573.9 | 16076.1 | 661.2  | 45 | microtubule-associated protein 1 light chain 3 beta                                           | MAP1LC3B  |
| 209325_s_at | 875.7  | 433.6  | 2078.9  | 10.7   | 45 | regulator of G-protein signalling 16                                                          | RGS16     |
| 221054_s_at | 405.2  | 125.6  | 890.2   | 2.4    | 45 | T-cell leukemia/lymphoma 6                                                                    | TCL6      |
| 203954_x_at | 112.4  | 104    | 394.1   | 9.6    | 45 | claudin 3                                                                                     | CLDN3     |
| 205214_at   | 696.7  | 515.9  | 3489    | 16.2   | 45 | serine/threonine kinase 17b (apoptosis-inducing)                                              | STK17B    |
| 201393_s_at | 1577.7 | 1059.6 | 1740.6  | 12.7   | 45 | insulin-like growth factor 2 receptor                                                         | IGF2R     |
| 212027_at   | 1333   | 485.9  | 996.2   | 18.9   | 45 | RNA binding motif protein 25                                                                  | RBM25     |
| 213669_at   | 844.5  | 573.2  | 991     | 8.8    | 45 | FCH domain only 1                                                                             | FCHO1     |
| 214542_x_at | 506.2  | 283.5  | 898.1   | 10.8   | 45 | histone 1, H2ai                                                                               | HIST1H2AI |
| 217236_x_at | 710.2  | 459.7  | 761.3   | 23.6   | 45 | Immunoglobulin heavy constant gamma 1 (G1m marker)                                            | IGHG1     |
| 205901_at   | 667.9  | 295.2  | 1655.3  | 15.2   | 45 | prepronociceptin                                                                              | PNOC      |
| 212291_at   | 925.7  | 468.1  | 1971.1  | 11.8   | 45 | homeodomain interacting protein kinase 1                                                      | HIPK1     |

|             |         |        |         |       |    |                                                                              |          |
|-------------|---------|--------|---------|-------|----|------------------------------------------------------------------------------|----------|
| 205803_s_at | 161.9   | 108.6  | 503.3   | 2.2   | 45 | transient receptor potential cation channel, subfamily C, member 1           | TRPC1    |
| 220266_s_at | 900.9   | 355.1  | 6496.8  | 11.3  | 45 | Kruppel-like factor 4 (gut)                                                  | KLF4     |
| 215330_at   | 211.7   | 109.6  | 776.5   | 5.7   | 45 | Hypothetical protein FLJ43663                                                | FLJ43663 |
| 214043_at   | 266.7   | 154.3  | 3097.2  | 5.6   | 45 | Protein tyrosine phosphatase, receptor type, D                               | PTPRD    |
| 201979_s_at | 812.1   | 513.7  | 906.9   | 9.9   | 44 | protein phosphatase 5, catalytic subunit                                     | PPP5C    |
| 203479_s_at | 588.2   | 244.4  | 715.9   | 15.1  | 44 | OTU domain containing 4                                                      | OTUD4    |
| 204908_s_at | 1879.3  | 431.4  | 2716.8  | 7.4   | 44 | B-cell CLL/lymphoma 3                                                        | BCL3     |
| 209559_at   | 347.6   | 145.1  | 483.7   | 8.8   | 44 | huntingtin interacting protein-1-related                                     | HIP1R    |
| 209718_at   | 483     | 361.1  | 707.2   | 9.7   | 44 | kleisin beta                                                                 | hCAP-H2  |
| 212588_at   | 3482.7  | 2298.1 | 6552    | 94.9  | 44 | protein tyrosine phosphatase, receptor type, C                               | PTPRC    |
| 218434_s_at | 956.1   | 383.5  | 3026.3  | 9.4   | 44 | acetoacetyl-CoA synthetase                                                   | AACS     |
| 214581_x_at | 729.6   | 320.5  | 3228.7  | 3.1   | 44 | tumor necrosis factor receptor superfamily, member 21                        | TNFRSF21 |
| 213172_at   | 108.6   | 53.6   | 428.6   | 3.8   | 44 | tetratricopeptide repeat domain 9                                            | TTC9     |
| 202478_at   | 1685.6  | 710.2  | 14010.6 | 14.2  | 44 | tribbles homolog 2 (Drosophila)                                              | TRIB2    |
| 218523_at   | 1581.8  | 585.8  | 2999.4  | 34.4  | 44 | phospholysine phosphohistidine inorganic pyrophosphate phosphatase           | LHPP     |
| 220324_at   | 121.8   | 96.4   | 227.5   | 2.6   | 44 | chromosome 6 open reading frame 155                                          | C6orf155 |
| 203320_at   | 2769.4  | 1553.3 | 5905.3  | 148.9 | 44 | lymphocyte adaptor protein                                                   | LNK      |
| 216518_at   | 205.1   | 116.7  | 515.1   | 4.4   | 44 | MRNA; cDNA DKFZp564E233 (from clone DKFZp564E233)                            | ---      |
| 220809_at   | 135.3   | 66.2   | 449.4   | 3.5   | 44 | hypothetical protein FLJ14327                                                | FLJ14327 |
| 206802_at   | 233.8   | 138.6  | 478     | 10.2  | 44 | paired box gene 5 (B-cell lineage specific activator)                        | PAX5     |
| 212478_at   | 661.4   | 318.8  | 1868.1  | 9.3   | 44 | hypothetical protein FLJ13910                                                | FLJ13910 |
| 217209_at   | 165.2   | 118.6  | 446.2   | 12.2  | 44 | ---                                                                          | ---      |
| 204719_at   | 102.2   | 52.9   | 338     | 1.8   | 44 | ATP-binding cassette, sub-family A (ABC1), member 8                          | ABCA8    |
| 209982_s_at | 155.3   | 109.2  | 1350.3  | 4.7   | 44 | neurexin 2                                                                   | NRXN2    |
| 201780_s_at | 1014    | 631.5  | 772.5   | 40.1  | 44 | ring finger protein 13                                                       | RNF13    |
| 209153_s_at | 12253.8 | 5691   | 8812.5  | 552.7 | 44 | transcription factor 3 (E2A immunoglobulin enhancer binding factors E12/E47) | TCF3     |
| 209754_s_at | 1401.8  | 705.4  | 1593.9  | 16.7  | 44 | thymopoietin                                                                 | TMPO     |
| 211404_s_at | 1362.9  | 833    | 2347.3  | 22.9  | 44 | amyloid beta (A4) precursor-like protein 2                                   | APLP2    |
| 212073_at   | 730.4   | 433.9  | 766.1   | 8.7   | 44 | casein kinase 2, alpha 1 polypeptide                                         | CSNK2A1  |
| 214190_x_at | 591     | 240.2  | 730.7   | 5.6   | 44 | golgi associated, gamma adaptin ear containing, ARF binding protein 2        | GGA2     |
| 214422_at   | 250.7   | 58.5   | 306.9   | 2.1   | 44 | RAD23 homolog B (S. cerevisiae)                                              | RAD23B   |
| 215083_at   | 681.3   | 386.7  | 923.9   | 9.7   | 44 | Paraspeckle component 1                                                      | PSPC1    |
| 216067_at   | 321.2   | 122    | 372.9   | 4.1   | 44 | ---                                                                          | ---      |
| 216218_s_at | 1014.3  | 670.8  | 1657.5  | 30.6  | 44 | phospholipase C-like 2                                                       | PLCL2    |

|             |         |         |         |        |    |                                                                                                   |           |
|-------------|---------|---------|---------|--------|----|---------------------------------------------------------------------------------------------------|-----------|
| 222309_at   | 281.3   | 147     | 1126.8  | 2.9    | 44 | Chromosome 6 open reading frame 62                                                                | C6orf62   |
| 210993_s_at | 4684    | 2723.7  | 16961   | 7.3    | 44 | SMAD, mothers against DPP homolog 1 (Drosophila)                                                  | SMAD1     |
| 200916_at   | 5108.1  | 1744.3  | 6584.8  | 62.5   | 43 | transgelin 2                                                                                      | TAGLN2    |
| 208947_s_at | 452.8   | 239.9   | 528.5   | 9.1    | 43 | regulator of nonsense transcripts 1                                                               | RENT1     |
| 210717_at   | 366.1   | 204.6   | 486.9   | 4.4    | 43 | Ubiquitin-conjugating enzyme E2D 2 (UBC4/5 homolog, yeast)                                        | UBE2D2    |
| 217284_x_at | 1056.8  | 484.7   | 2082.6  | 16.8   | 43 | serine hydrolase-like                                                                             | SERHL     |
| 217684_at   | 311.6   | 169.8   | 536.7   | 12.3   | 43 | thymidylate synthetase                                                                            | TYMS      |
| 218435_at   | 1320.3  | 790.5   | 1286.5  | 9.1    | 43 | DnaJ (Hsp40) homolog, subfamily C, member 15                                                      | DNAJC15   |
| 219279_at   | 952.4   | 771.3   | 2004.7  | 24.3   | 43 | dedicator of cytokinesis 10                                                                       | DOCK10    |
| 222337_at   | 144.1   | 74.4    | 405.1   | 7.2    | 43 | Nardilysin (N-arginine dibasic convertase)                                                        | NRD1      |
| 203896_s_at | 116.5   | 34.3    | 890.2   | 2.2    | 43 | phospholipase C, beta 4                                                                           | PLCB4     |
| 201072_s_at | 973.3   | 734.6   | 1263    | 53.5   | 43 | SWI/SNF related, matrix associated, actin dependent regulator of chromatin, subfamily c, member 1 | SMARCC1   |
| 204269_at   | 1830.9  | 1064.3  | 3312.7  | 151.8  | 43 | pim-2 oncogene                                                                                    | PIM2      |
| 208795_s_at | 4268.9  | 3568.4  | 4893.9  | 592.1  | 43 | MCM7 minichromosome maintenance deficient 7 (S. cerevisiae)                                       | MCM7      |
| 212345_s_at | 2299.8  | 1709.5  | 2604.3  | 251.9  | 43 | cAMP responsive element binding protein 3-like 2                                                  | CREB3L2   |
| 215164_at   | 965.1   | 508.4   | 1611.4  | 4.7    | 43 | Transcription factor 4                                                                            | TCF4      |
| 218927_s_at | 1032.4  | 762.2   | 1817.1  | 17.2   | 43 | carbohydrate (chondroitin 4) sulfotransferase 12                                                  | CHST12    |
| 217274_x_at | 1238.9  | 796.9   | 3380    | 97.2   | 43 | myosin, light polypeptide 4, alkali; atrial, embryonic                                            | MYL4      |
| 205620_at   | 173.8   | 72.8    | 322.8   | 6.7    | 43 | coagulation factor X                                                                              | F10       |
| 208583_x_at | 1234.3  | 766.5   | 1297.9  | 37.6   | 43 | histone 1, H2aj                                                                                   | HIST1H2AJ |
| 211921_x_at | 47312.2 | 33664.3 | 58378.1 | 7053.1 | 43 | prothymosin, alpha (gene sequence 28) /// prothymosin, alpha (gene sequence 28)                   | PTMA      |
| 219072_at   | 480.8   | 422.9   | 746.5   | 26     | 43 | B-cell CLL/lymphoma 7C                                                                            | BCL7C     |
| 216466_at   | 87.7    | 47.4    | 333.5   | 1.6    | 43 | neuron navigator 3                                                                                | NAV3      |
| 214774_x_at | 114.6   | 17.3    | 1325.4  | 0.6    | 43 | trinucleotide repeat containing 9                                                                 | TNRC9     |
| 200681_at   | 5619.1  | 3222.4  | 4088.7  | 914.8  | 42 | glyoxalase I                                                                                      | GLO1      |
| 202825_at   | 566.4   | 326.3   | 1090.4  | 12.8   | 42 | solute carrier family 25 (mitochondrial carrier; adenine nucleotide translocator), member 4       | SLC25A4   |
| 216508_x_at | 5910.3  | 3567.4  | 6310.2  | 494.6  | 42 | high-mobility group box 1                                                                         | HMGB1     |
| 220764_at   | 195.7   | 132.2   | 293.8   | 6.7    | 42 | protein phosphatase 4, regulatory subunit 2                                                       | PPP4R2    |
| 212420_at   | 2900.9  | 2182.6  | 6708    | 168.7  | 42 | E74-like factor 1 (ets domain transcription factor)                                               | ELF1      |
| 212758_s_at | 646.9   | 184.1   | 1585.5  | 9      | 42 | transcription factor 8 (represses interleukin 2 expression)                                       | TCF8      |
| 220374_at   | 339.7   | 241.8   | 682.4   | 12.6   | 42 | BTB (POZ) domain containing 5                                                                     | BTBD5     |
| 200616_s_at | 946     | 343.2   | 927.7   | 12.4   | 42 | KIAA0152                                                                                          | KIAA0152  |



|             |         |         |         |        |    |                                                                                                                                    |          |
|-------------|---------|---------|---------|--------|----|------------------------------------------------------------------------------------------------------------------------------------|----------|
| 205205_at   | 982.8   | 305.4   | 1182.4  | 10.7   | 42 | v-rel reticuloendotheliosis viral oncogene homolog B, nuclear factor of kappa light polypeptide gene enhancer in B-cells 3 (avian) | RELB     |
| 207943_x_at | 543     | 330.3   | 625.4   | 8.5    | 42 | pleiomorphic adenoma gene-like 1                                                                                                   | PLAGL1   |
| 209038_s_at | 345     | 152.6   | 668     | 8.1    | 42 | EH-domain containing 1                                                                                                             | EHD1     |
| 210666_at   | 372.9   | 43.1    | 289.3   | 10.2   | 42 | iduronate 2-sulfatase (Hunter syndrome)                                                                                            | IDS      |
| 212122_at   | 182.5   | 81.3    | 264     | 3      | 42 | ras homolog gene family, member Q                                                                                                  | RHOQ     |
| 212684_at   | 397     | 337.6   | 629.4   | 14.1   | 42 | zinc finger protein 3 (A8-51)                                                                                                      | ZNF3     |
| 215269_at   | 990.5   | 519.8   | 1185.3  | 15.4   | 42 | transmembrane protein 1                                                                                                            | TMEM1    |
| 216422_at   | 274     | 122.3   | 399.5   | 6.9    | 42 | proliferation-associated 2G4, 38kDa                                                                                                | PA2G4    |
| 221043_at   | 524.2   | 318.4   | 711.7   | 12.9   | 42 | ---                                                                                                                                | ---      |
| 221952_x_at | 17836.4 | 16373.5 | 17116.4 | 2216.8 | 42 | TRM5 tRNA methyltransferase 5 homolog ( <i>S. cerevisiae</i> )                                                                     | TRMT5    |
| 203590_at   | 680.5   | 506.9   | 1718.3  | 21.6   | 42 | dynein, cytoplasmic, light intermediate polypeptide 2                                                                              | DNCL12   |
| 208703_s_at | 1557.7  | 1261.2  | 3450.2  | 133.7  | 42 | amyloid beta (A4) precursor-like protein 2                                                                                         | APLP2    |
| 210362_x_at | 328.4   | 126.9   | 723.2   | 5.6    | 42 | promyelocytic leukemia                                                                                                             | PML      |
| 214852_x_at | 154.4   | 107.8   | 362.4   | 6      | 42 | vacuolar protein sorting 13A (yeast)                                                                                               | VPS13A   |
| 217418_x_at | 4552.9  | 1979.4  | 25689   | 63.2   | 42 | membrane-spanning 4-domains, subfamily A, member 1                                                                                 | MS4A1    |
| 202192_s_at | 3906.7  | 2433.3  | 4114.9  | 274.1  | 41 | growth arrest-specific 7                                                                                                           | GAS7     |
| 203376_at   | 3692.7  | 2663    | 3142.2  | 506    | 41 | cell division cycle 40 homolog (yeast)                                                                                             | CDC40    |
| 209470_s_at | 212.6   | 93.7    | 341.2   | 1.4    | 41 | glycoprotein M6A                                                                                                                   | GPM6A    |
| 212529_at   | 297.1   | 117     | 559.5   | 8.7    | 41 | hypothetical protein FLJ30656                                                                                                      | FLJ30656 |
| 215159_s_at | 466     | 342.8   | 742.5   | 6.5    | 41 | NAD kinase                                                                                                                         | NADK     |
| 201565_s_at | 5880.2  | 1727.4  | 19822.8 | 47.1   | 41 | inhibitor of DNA binding 2, dominant negative helix-loop-helix protein                                                             | ID2      |
| 213299_at   | 179.6   | 60.8    | 529.2   | 4.1    | 41 | zinc finger and BTB domain containing 7A                                                                                           | ZBTB7A   |
| 208245_at   | 104.5   | 67      | 842.3   | 1.6    | 41 | RAB9, member RAS oncogene family, pseudogene 1                                                                                     | RAB9P1   |
| 204346_s_at | 1584.9  | 1272.1  | 2423.3  | 129.2  | 41 | Ras association (RalGDS/AF-6) domain family 1                                                                                      | RASSF1   |
| 209478_at   | 1031.7  | 918     | 1260.3  | 41.6   | 41 | stimulated by retinoic acid 13 homolog (mouse)                                                                                     | STRA13   |
| 210115_at   | 633.5   | 354.8   | 928.7   | 9      | 41 | ribosomal protein L39-like                                                                                                         | RPL39L   |
| 210218_s_at | 510.7   | 252.4   | 430.8   | 8.7    | 41 | nuclear antigen Sp100                                                                                                              | SP100    |
| 210407_at   | 483.2   | 237.4   | 667     | 4.8    | 41 | protein phosphatase 1A (formerly 2C), magnesium-dependent, alpha isoform                                                           | PPM1A    |
| 212026_s_at | 384.9   | 198.5   | 582.4   | 10.9   | 41 | exocyst complex component 7                                                                                                        | EXOC7    |
| 218401_s_at | 959     | 552.1   | 927.4   | 73.5   | 41 | zinc finger protein 281                                                                                                            | ZNF281   |
| 222378_at   | 210.6   | 121.7   | 441.6   | 5.2    | 41 | Hypothetical protein FLJ43663                                                                                                      | FLJ43663 |
| 207631_at   | 165.8   | 85.7    | 337     | 7.7    | 41 | neighbor of BRCA1 gene 2                                                                                                           | NBR2     |
| 211151_x_at | 667.6   | 384.3   | 2032.1  | 6      | 41 | growth hormone 1                                                                                                                   | GH1      |
| 43427_at    | 201.2   | 143.7   | 621.5   | 9.3    | 41 | acetyl-Coenzyme A carboxylase beta                                                                                                 | ACACB    |

|             |        |         |         |        |    |                                                                                           |                         |
|-------------|--------|---------|---------|--------|----|-------------------------------------------------------------------------------------------|-------------------------|
| 216361_s_at | 279.2  | 87.6    | 690.4   | 2      | 41 | MYST histone acetyltransferase (monocytic leukemia) 3                                     | MYST3                   |
| 219135_s_at | 356.2  | 262.9   | 1031.1  | 9.5    | 41 | hypothetical protein FLJ12681                                                             | FLJ12681                |
| 208476_s_at | 185.2  | 147.7   | 735.6   | 6.5    | 41 | FERM domain containing 4A                                                                 | FRMD4A                  |
| 213954_at   | 101    | 74.4    | 325.1   | 3.3    | 41 | KIAA0888 protein                                                                          | KIAA0888                |
| 212592_at   | 806.3  | 485.3   | 15583.5 | 8.7    | 41 | Immunoglobulin J polypeptide, linker protein for immunoglobulin alpha and mu polypeptides | IGJ                     |
| 202005_at   | 443.9  | 239.8   | 814     | 25.5   | 41 | suppression of tumorigenicity 14 (colon carcinoma, matriptase, epithin)                   | ST14                    |
| 202487_s_at | 9563.8 | 8094.3  | 9690.7  | 1623.9 | 41 | H2A histone family, member V                                                              | H2AFV                   |
| 204484_at   | 3918.2 | 2035.4  | 3075.3  | 59.7   | 41 | phosphoinositide-3-kinase, class 2, beta polypeptide                                      | PIK3C2B                 |
| 206707_x_at | 3161.2 | 1759    | 4423.4  | 183.3  | 41 | chromosome 6 open reading frame 32                                                        | C6orf32                 |
| 214243_s_at | 993.5  | 280.2   | 1457.1  | 10     | 41 | serine hydrolase-like                                                                     | SERHL                   |
| 214481_at   | 430    | 143.5   | 665.5   | 3.9    | 41 | histone 1, H2am                                                                           | HIST1H2AM               |
| 217576_x_at | 630.6  | 373     | 947.5   | 13.1   | 41 | son of sevenless homolog 2 (Drosophila)                                                   | SOS2                    |
| 222322_at   | 254.5  | 79.2    | 429.9   | 1.6    | 41 | Transcribed locus                                                                         | ---                     |
| 203833_s_at | 873.1  | 695.6   | 1838    | 91.8   | 41 | trans-golgi network protein 2                                                             | TGOLN2                  |
| 200719_at   | 1366.7 | 1017.2  | 3859    | 22.4   | 41 | S-phase kinase-associated protein 1A (p19A)                                               | SKP1A                   |
| 216277_at   | 135.1  | 67.5    | 619.8   | 5      | 41 | BUB1 budding uninhibited by benzimidazoles 1 homolog (yeast)                              | BUB1                    |
| 200772_x_at | 41243  | 33563.5 | 53587.8 | 7692.7 | 40 | prothymosin, alpha (gene sequence 28)                                                     | PTMA                    |
| 204048_s_at | 369    | 251.6   | 684.4   | 6.3    | 40 | phosphatase and actin regulator 2                                                         | PHACTR2                 |
| 204074_s_at | 1098.2 | 494.2   | 737.2   | 17.2   | 40 | glycine-, glutamate-, thienylcyclohexylpiperidine-binding protein                         | GlyBP                   |
| 208719_s_at | 2411.4 | 187.5   | 3784    | 6.1    | 40 | DEAD (Asp-Glu-Ala-Asp) box polypeptide 17                                                 | DDX17                   |
| 214743_at   | 2864.9 | 2185.8  | 3477.7  | 461.9  | 40 | cut-like 1, CCAAT displacement protein (Drosophila)                                       | CUTL1                   |
| 214834_at   | 152.8  | 61.7    | 287.8   | 2.7    | 40 | HBII-437 C/D box snoRNA /// HBII-13 snoRNA                                                | HBII-437 ///<br>HBII-13 |
| 215802_at   | 699.1  | 240.8   | 742.6   | 5      | 40 | Transducin-like enhancer of split 1 (E(sp1) homolog, Drosophila)                          | TLE1                    |
| 203233_at   | 1017   | 703     | 2086.3  | 21.8   | 40 | interleukin 4 receptor                                                                    | IL4R                    |
| 220879_at   | 356.5  | 218.2   | 837.1   | 28.7   | 40 | ---                                                                                       | ---                     |
| 201283_s_at | 289.1  | 87.5    | 329     | 6.7    | 40 | OGT(O-Glc-NAc transferase)-interacting protein 106 KDa                                    | OIP106                  |
| 203395_s_at | 309    | 220.9   | 380.9   | 8.2    | 40 | hairy and enhancer of split 1, (Drosophila)                                               | HES1                    |
| 204524_at   | 692.2  | 215.4   | 649.7   | 9.2    | 40 | 3-phosphoinositide dependent protein kinase-1                                             | PDPK1                   |
| 215615_x_at | 217.3  | 119     | 406.9   | 4.4    | 40 | ---                                                                                       | ---                     |
| 217650_x_at | 526.7  | 320     | 665.4   | 16.1   | 40 | ST3 beta-galactoside alpha-2,3-sialyltransferase 2                                        | ST3GAL2                 |
| 218039_at   | 4736   | 3722.1  | 7499    | 402.9  | 40 | nucleolar and spindle associated protein 1                                                | NUSAP1                  |
| 221654_s_at | 2225.9 | 1866.2  | 3238.5  | 454.2  | 40 | ubiquitin specific peptidase 3                                                            | USP3                    |

|             |         |         |         |        |    |                                                                   |               |
|-------------|---------|---------|---------|--------|----|-------------------------------------------------------------------|---------------|
| 205193_at   | 417.5   | 181     | 1462.3  | 21.6   | 40 | v-maf musculoaponeurotic fibrosarcoma oncogene homolog F (avian)  | MAFF          |
| 206100_at   | 490.7   | 264.8   | 1235.7  | 8.9    | 40 | carboxypeptidase M                                                | CPM           |
| 219703_at   | 211.4   | 170.9   | 493.9   | 3.6    | 40 | meiosis-specific nuclear structural 1                             | MNS1          |
| 206204_at   | 74.9    | 46.7    | 814.1   | 1.8    | 40 | growth factor receptor-bound protein 14                           | GRB14         |
| 204115_at   | 371.9   | 300.5   | 4663.6  | 3.3    | 40 | guanine nucleotide binding protein (G protein), gamma 11          | GNG11         |
| 202879_s_at | 768.3   | 396.1   | 815.9   | 10.9   | 40 | pleckstrin homology, Sec7 and coiled-coil domains 1 (cytohesin 1) | PSCD1         |
| 205346_at   | 310.7   | 138.4   | 420.8   | 8.9    | 40 | ST3 beta-galactoside alpha-2,3-sialyltransferase 2                | ST3GAL2       |
| 213940_s_at | 1325.5  | 781.7   | 2148.6  | 5.4    | 40 | formin binding protein 1                                          | FNBP1         |
| 214030_at   | 552.5   | 218.8   | 766.3   | 9.2    | 40 | hypothetical protein DKFZp667G2110                                | DKFZp667G2110 |
| 219312_s_at | 287.3   | 230     | 531.5   | 5.7    | 40 | zinc finger and BTB domain containing 10                          | ZBTB10        |
| 219534_x_at | 307.9   | 42      | 561.3   | 3.2    | 40 | cyclin-dependent kinase inhibitor 1C (p57, Kip2)                  | CDKN1C        |
| 221848_at   | 429.1   | 362.1   | 661.7   | 24.7   | 40 | zinc finger, CCCH-type with G patch domain                        | ZGPAT         |
| 203467_at   | 368     | 154.2   | 751.9   | 8      | 40 | phosphomannomutase 1                                              | PMM1          |
| 205024_s_at | 1179.4  | 755.8   | 1567.1  | 28.5   | 39 | RAD51 homolog (RecA homolog, E. coli) (S. cerevisiae)             | RAD51         |
| 208808_s_at | 14054.5 | 11679.2 | 14451.9 | 1436.6 | 39 | high-mobility group box 2                                         | HMGB2         |
| 208928_at   | 387.9   | 161.8   | 547.1   | 9.6    | 39 | P450 (cytochrome) oxidoreductase                                  | POR           |
| 209447_at   | 1248.8  | 638.5   | 1546.1  | 14.3   | 39 | spectrin repeat containing, nuclear envelope 1                    | SYNE1         |
| 212105_s_at | 1088.6  | 498.6   | 1463.7  | 13.4   | 39 | DEAH (Asp-Glu-Ala-His) box polypeptide 9                          | DHX9          |
| 214665_s_at | 3166    | 2307.8  | 3142.1  | 334.7  | 39 | calcium binding protein P22                                       | CHP           |
| 221628_s_at | 326.8   | 98.4    | 548.3   | 8.3    | 39 | cytokine-like nuclear factor n-pac                                | N-PAC         |
| 204646_at   | 418.5   | 299.3   | 1102.6  | 6.2    | 39 | dihydropyrimidine dehydrogenase                                   | DPYD          |
| 205081_at   | 1999.9  | 1137.4  | 6452.3  | 8.4    | 39 | cysteine-rich protein 1 (intestinal)                              | CRIP1         |
| 206877_at   | 122     | 40.9    | 918.6   | 6      | 39 | MAX dimerization protein 1                                        | MXD1          |
| 212651_at   | 285.2   | 84.9    | 1297.4  | 4.8    | 39 | Rho-related BTB domain containing 1                               | RHOBTB1       |
| 214251_s_at | 603.2   | 285.5   | 1741.8  | 4.1    | 39 | nuclear mitotic apparatus protein 1                               | NUMA1         |
| 201962_s_at | 1277.2  | 637.4   | 1078.3  | 24.4   | 39 | ring finger protein 41                                            | RNF41         |
| 204183_s_at | 383.8   | 245.7   | 428     | 9.8    | 39 | adrenergic, beta, receptor kinase 2                               | ADRBK2        |
| 205267_at   | 12559.7 | 5949    | 10129.5 | 195.1  | 39 | POU domain, class 2, associating factor 1                         | POU2AF1       |
| 209501_at   | 706.2   | 547.4   | 1404.7  | 21.9   | 39 | cerebellar degeneration-related protein 2, 62kDa                  | CDR2          |
| 215779_s_at | 1882.7  | 716.6   | 3292.8  | 15.4   | 39 | histone 1, H2bg                                                   | HIST1H2BG     |
| 219507_at   | 748.8   | 521.7   | 755.7   | 23     | 39 | arginine/serine-rich coiled-coil 1                                | RSRC1         |
| 221908_at   | 523.4   | 234.3   | 943.1   | 13.8   | 39 | Transmembrane protein 118                                         | TMEM118       |
| 208325_s_at | 664.6   | 384.2   | 1413.3  | 12.8   | 39 | A kinase (PRKA) anchor protein 13                                 | AKAP13        |
| 209803_s_at | 109.2   | 47.7    | 258.5   | 1.7    | 39 | pleckstrin homology-like domain, family A, member 2               | PHLDA2        |

|             |        |        |         |       |    |                                                                                               |                   |
|-------------|--------|--------|---------|-------|----|-----------------------------------------------------------------------------------------------|-------------------|
| 207592_s_at | 106    | 47.9   | 252.5   | 4.4   | 39 | hyperpolarization activated cyclic nucleotide-gated potassium channel 2                       | HCN2              |
| 205489_at   | 1211.9 | 581.2  | 3410.5  | 45.9  | 39 | crystallin, mu                                                                                | CRYM              |
| 202102_s_at | 4917.3 | 2139.9 | 4161.3  | 206.4 | 39 | bromodomain containing 4                                                                      | BRD4              |
| 209461_x_at | 392    | 219.8  | 510.5   | 10.2  | 39 | WD repeat domain 18                                                                           | WDR18             |
| 210778_s_at | 746.7  | 571.2  | 1009.9  | 9.4   | 39 | MAX dimerization protein 4                                                                    | MXD4              |
| 213062_at   | 944.9  | 662    | 1245.4  | 21.2  | 39 | N-terminal asparagine amidase                                                                 | NTAN1             |
| 213996_at   | 1935.9 | 1006.9 | 1599.5  | 31.4  | 39 | yippee-like 1 (Drosophila)                                                                    | YPEL1             |
| 55583_at    | 356.5  | 228.2  | 491.2   | 34.9  | 39 | dedicator of cytokinesis 6                                                                    | DOCK6             |
| 217626_at   | 183.5  | 73.9   | 598.9   | 8.1   | 39 | aldo-keto reductase family 1, member C1 /// aldo-keto reductase family 1, member C2           | AKR1C1 /// AKR1C2 |
| 219951_s_at | 175.7  | 117.5  | 603     | 6.9   | 39 | chromosome 20 open reading frame 12                                                           | C20orf12          |
| 205830_at   | 121.3  | 64     | 421.7   | 2.2   | 39 | calmegin                                                                                      | CLGN              |
| 213156_at   | 498.5  | 259.4  | 517.5   | 4     | 38 | MRNA; cDNA DKFZp586B211 (from clone DKFZp586B211) /// Homo sapiens, clone IMAGE:4214654, mRNA | ---               |
| 216621_at   | 567.5  | 296.2  | 664.1   | 12.4  | 38 | Rho-associated, coiled-coil containing protein kinase 1                                       | ROCK1             |
| 217268_at   | 92.9   | 29     | 371.7   | 0.8   | 38 | RAB7, member RAS oncogene family                                                              | RAB7              |
| 210491_at   | 137.5  | 98.5   | 538.1   | 3.2   | 38 | ---                                                                                           | ---               |
| 203126_at   | 439.7  | 366.7  | 1524.8  | 6     | 38 | inositol(myo)-1(or 4)-monophosphatase 2                                                       | IMPA2             |
| 212254_s_at | 162    | 121.3  | 552.2   | 4.5   | 38 | dystonin                                                                                      | DST               |
| 202146_at   | 882.7  | 430.7  | 853.4   | 27.8  | 38 | interferon-related developmental regulator 1                                                  | IFRD1             |
| 204975_at   | 1069.6 | 427.3  | 1016.3  | 13    | 38 | epithelial membrane protein 2                                                                 | EMP2              |
| 205426_s_at | 453.2  | 267.2  | 650.8   | 11.7  | 38 | huntingtin interacting protein 1                                                              | HIP1              |
| 209182_s_at | 993.6  | 330.7  | 1620.7  | 9.7   | 38 | chromosome 10 open reading frame 10                                                           | C10orf10          |
| 218194_at   | 5628.1 | 2372.6 | 5536    | 376.4 | 38 | REX2, RNA exonuclease 2 homolog (S. cerevisiae)                                               | REXO2             |
| 217204_at   | 190.3  | 82.6   | 408.3   | 2.2   | 38 | Mitochondrial translational release factor 1-like                                             | MTRF1L            |
| 219922_s_at | 331    | 157.2  | 854.4   | 3.2   | 38 | latent transforming growth factor beta binding protein 3                                      | LTBP3             |
| 213537_at   | 2955.4 | 1564.6 | 10603.5 | 32.8  | 38 | major histocompatibility complex, class II, DP alpha 1                                        | HLA-DPA1          |
| 214230_at   | 333.3  | 172.9  | 3101.8  | 6.6   | 38 | cell division cycle 42 (GTP binding protein, 25kDa)                                           | CDC42             |
| 209156_s_at | 133.3  | 51.3   | 605.9   | 4.2   | 38 | collagen, type VI, alpha 2                                                                    | COL6A2            |
| 205306_x_at | 1281.1 | 521.1  | 1837.7  | 62.9  | 37 | kynurenine 3-monooxygenase (kynurenine 3-hydroxylase)                                         | KMO               |
| 208184_s_at | 1225.2 | 677    | 1209.5  | 24.7  | 37 | transmembrane protein 1                                                                       | TMEM1             |
| 212492_s_at | 1554.5 | 674.1  | 1671.1  | 79.6  | 37 | jumonji domain containing 2B                                                                  | JMJD2B            |
| 213106_at   | 1975.6 | 946.3  | 1743.3  | 150.2 | 37 | ATPase, aminophospholipid transporter (APLT), Class I, type 8A, member 1                      | ATP8A1            |
| 219286_s_at | 1929.7 | 1420.7 | 2353.4  | 39    | 37 | RNA binding motif protein 15                                                                  | RBM15             |

|             |         |         |         |        |    |                                                                                                                |           |
|-------------|---------|---------|---------|--------|----|----------------------------------------------------------------------------------------------------------------|-----------|
| 204840_s_at | 116.6   | 22.2    | 405.6   | 0.4    | 37 | early endosome antigen 1, 162kD                                                                                | EEA1      |
| 219651_at   | 158     | 50.8    | 472.4   | 3.7    | 37 | developmental pluripotency associated 4                                                                        | DPPA4     |
| 210356_x_at | 4859.8  | 2065.7  | 27465.2 | 118.8  | 37 | membrane-spanning 4-domains, subfamily A, member 1                                                             | MS4A1     |
| 201367_s_at | 3841.3  | 440.5   | 3294.3  | 4.4    | 37 | zinc finger protein 36, C3H type-like 2                                                                        | ZFP36L2   |
| 205436_s_at | 5772.5  | 3401.4  | 8416.8  | 129.1  | 37 | H2A histone family, member X                                                                                   | H2AFX     |
| 211672_s_at | 1173.9  | 986.1   | 1802.1  | 18.1   | 37 | actin related protein 2/3 complex, subunit 4, 20kDa ///<br>actin related protein 2/3 complex, subunit 4, 20kDa | ARPC4     |
| 212459_x_at | 788.8   | 562.7   | 1530.9  | 53.5   | 37 | succinate-CoA ligase, GDP-forming, beta subunit                                                                | SUCLG2    |
| 212520_s_at | 2137.8  | 1356.8  | 2927.7  | 140.6  | 37 | SWI/SNF related, matrix associated, actin dependent<br>regulator of chromatin, subfamily a, member 4           | SMARCA4   |
| 215169_at   | 403.8   | 77.6    | 459.2   | 3.4    | 37 | solute carrier family 35, member E2                                                                            | SLC35E2   |
| 215781_s_at | 303.2   | 111.1   | 458.5   | 4.7    | 37 | topoisomerase (DNA) III beta                                                                                   | TOP3B     |
| 220589_s_at | 302.3   | 168.9   | 504.6   | 10.4   | 37 | uncharacterized hematopoietic stem/progenitor cells<br>protein MDS028                                          | MDS028    |
| 222001_x_at | 1020.4  | 723     | 2006.4  | 11     | 37 | LOC440669                                                                                                      | LOC440669 |
| 205423_at   | 1750.2  | 1333.8  | 3693.6  | 144.7  | 37 | adaptor-related protein complex 1, beta 1 subunit                                                              | AP1B1     |
| 219371_s_at | 8724.6  | 5051.9  | 18217   | 451.6  | 37 | Kruppel-like factor 2 (lung)                                                                                   | KLF2      |
| 205471_s_at | 235.8   | 104.3   | 1645.6  | 3.7    | 37 | dachshund homolog 1 (Drosophila)                                                                               | DACH1     |
| 36711_at    | 454.5   | 125.8   | 4719.8  | 2.7    | 37 | v-maf musculoaponeurotic fibrosarcoma oncogene<br>homolog F (avian)                                            | MAFF      |
| 209184_s_at | 3447.1  | 1380.2  | 19735.9 | 185.2  | 37 | insulin receptor substrate 2                                                                                   | IRS2      |
| 216080_s_at | 1763.4  | 1541.1  | 12130.1 | 26.7   | 37 | fatty acid desaturase 3                                                                                        | FADS3     |
| 206551_x_at | 1941.3  | 1090.3  | 1840.1  | 94.2   | 37 | kelch-like 24 (Drosophila)                                                                                     | KLHL24    |
| 209118_s_at | 6782.7  | 4027.8  | 10974.1 | 496.1  | 37 | tubulin, alpha 3                                                                                               | TUBA3     |
| 209592_s_at | 1061.5  | 830.1   | 1149.1  | 63.4   | 37 | WD repeat domain 68                                                                                            | WDR68     |
| 211997_x_at | 55066.4 | 40842.6 | 74824.4 | 4914.8 | 37 | H3 histone, family 3B (H3.3B)                                                                                  | H3F3B     |
| 204680_s_at | 531.6   | 492.2   | 1100    | 70.2   | 37 | Rap guanine nucleotide exchange factor (GEF) 5                                                                 | RAPGEF5   |
| 210360_s_at | 351.1   | 241.1   | 706     | 6      | 37 | metastasis suppressor 1                                                                                        | MTSS1     |
| 219995_s_at | 67.8    | 22.6    | 234.6   | 0.4    | 37 | hypothetical protein FLJ13841                                                                                  | FLJ13841  |
| 211141_s_at | 113.6   | 76.1    | 433.7   | 4      | 37 | CCR4-NOT transcription complex, subunit 3                                                                      | CNOT3     |
| 204244_s_at | 989.7   | 431.6   | 816     | 5.8    | 36 | activator of S phase kinase                                                                                    | ASK       |
| 207740_s_at | 1081.5  | 677     | 1204.7  | 20.3   | 36 | nucleoporin 62kDa                                                                                              | NUP62     |
| 209235_at   | 934.8   | 339.2   | 1405.7  | 21.7   | 36 | chloride channel 7                                                                                             | CLCN7     |
| 214829_at   | 520.5   | 150.3   | 618.9   | 2      | 36 | aminoadipate-semialdehyde synthase                                                                             | AASS      |
| 216012_at   | 3285.1  | 822.5   | 2116.6  | 164.8  | 36 | Unidentified mRNA, partial sequence                                                                            | ---       |
| 208579_x_at | 6232.3  | 2992.5  | 13423.9 | 240.5  | 36 | H2B histone family, member S                                                                                   | H2BFS     |
| 212609_s_at | 309.3   | 116.3   | 677.5   | 5.3    | 36 | V-akt murine thymoma viral oncogene homolog 3 (protein<br>kinase B, gamma)                                     | AKT3      |
| 215768_at   | 206.3   | 134.9   | 520.2   | 5.6    | 36 | SRY (sex determining region Y)-box 5                                                                           | SOX5      |

|             |         |        |         |       |    |                                                                                  |          |
|-------------|---------|--------|---------|-------|----|----------------------------------------------------------------------------------|----------|
| 216224_s_at | 227.1   | 178.7  | 506     | 12.9  | 36 | histone deacetylase 6                                                            | HDAC6    |
| 220297_at   | 133.8   | 90.5   | 314     | 8.7   | 36 | BTB (POZ) domain containing 7                                                    | BTBD7    |
| 218785_s_at | 120.6   | 74.9   | 459.4   | 3.1   | 36 | RAB, member RAS oncogene family-like 5                                           | RABL5    |
| 217263_x_at | 190     | 129.4  | 767.3   | 9.1   | 36 | runt-related transcription factor 1 (acute myeloid leukemia 1; aml1 oncogene)    | RUNX1    |
| 201629_s_at | 1512.1  | 1043.6 | 2486.8  | 52.9  | 36 | acid phosphatase 1, soluble                                                      | ACP1     |
| 201679_at   | 514.4   | 351.2  | 759.1   | 8.6   | 36 | arsenate resistance protein ARS2                                                 | ARS2     |
| 201745_at   | 908.2   | 601.1  | 1718.6  | 130.1 | 36 | PTK9 protein tyrosine kinase 9                                                   | PTK9     |
| 202870_s_at | 2228.1  | 1100.3 | 4341.3  | 56.3  | 36 | CDC20 cell division cycle 20 homolog ( <i>S. cerevisiae</i> )                    | CDC20    |
| 208107_s_at | 594.2   | 283.2  | 834.1   | 11.6  | 36 | exonuclease NEF-sp /// exonuclease NEF-sp                                        | LOC81691 |
| 209257_s_at | 2342.4  | 961.4  | 2637.3  | 83.1  | 36 | chondroitin sulfate proteoglycan 6 (bamacan)                                     | CSPG6    |
| 213810_s_at | 392.9   | 168.6  | 563.2   | 11    | 36 | Chromosome 6 open reading frame 166                                              | C6orf166 |
| 213947_s_at | 1435.9  | 1019.4 | 2459.7  | 55.1  | 36 | nucleoporin 210kDa                                                               | NUP210   |
| 214160_at   | 213.7   | 108.9  | 377.8   | 7     | 36 | ---                                                                              | ---      |
| 215720_s_at | 432.1   | 288.8  | 825     | 6.5   | 36 | nuclear transcription factor Y, alpha                                            | NFYA     |
| 217785_s_at | 386.1   | 113.6  | 458.8   | 7     | 36 | SNARE protein Ykt6                                                               | YKT6     |
| 207057_at   | 275.7   | 163.6  | 909.8   | 5.2   | 36 | solute carrier family 16 (monocarboxylic acid transporters), member 7            | SLC16A7  |
| 209446_s_at | 190     | 110.3  | 394.6   | 4.8   | 36 | ---                                                                              | ---      |
| 201482_at   | 401     | 314.2  | 1198.1  | 30.8  | 36 | quiescin Q6                                                                      | QSCN6    |
| 214242_at   | 128.5   | 56.6   | 458     | 4.8   | 36 | Mannosidase, alpha, class 1A, member 2                                           | MAN1A2   |
| 219208_at   | 114.6   | 37.6   | 281     | 3.8   | 36 | F-box protein 11                                                                 | FBXO11   |
| 221125_s_at | 479.4   | 282.6  | 2029.4  | 22.5  | 36 | potassium large conductance calcium-activated channel, subfamily M beta member 3 | KCNMB3   |
| 211884_s_at | 433.9   | 339.7  | 719.6   | 10    | 36 | class II, major histocompatibility complex, transactivator                       | CIITA    |
| 219646_at   | 607     | 193.7  | 653.3   | 10    | 36 | hypothetical protein FLJ20186                                                    | FLJ20186 |
| 204198_s_at | 1516.7  | 621.8  | 4598.1  | 16    | 36 | runt-related transcription factor 3                                              | RUNX3    |
| 220958_at   | 245.4   | 213.8  | 499     | 8.5   | 36 | unc-51-like kinase 4 ( <i>C. elegans</i> )                                       | ULK4     |
| 222179_at   | 238.6   | 189    | 550.6   | 10.6  | 36 | ---                                                                              | ---      |
| 212249_at   | 431.4   | 395.5  | 1226.3  | 13.1  | 36 | phosphoinositide-3-kinase, regulatory subunit 1 (p85 alpha)                      | PIK3R1   |
| 208518_s_at | 126.8   | 86.6   | 604.3   | 7.5   | 36 | period homolog 2 ( <i>Drosophila</i> )                                           | PER2     |
| 211238_at   | 102.8   | 72.7   | 447     | 3.6   | 36 | ADAM metallopeptidase domain 7                                                   | ADAM7    |
| 200706_s_at | 2637    | 1168.1 | 2666    | 19.5  | 35 | lipopolysaccharide-induced TNF factor                                            | LITAF    |
| 200921_s_at | 12107.4 | 6043.1 | 18371.2 | 274.8 | 35 | B-cell translocation gene 1, anti-proliferative                                  | BTG1     |
| 202705_at   | 2491.5  | 1661.2 | 4425.3  | 26.5  | 35 | cyclin B2                                                                        | CCNB2    |
| 207078_at   | 466.5   | 233.5  | 708.3   | 4.5   | 35 | mediator of RNA polymerase II transcription, subunit 6 homolog (yeast)           | MED6     |
| 207522_s_at | 6423.6  | 2981.6 | 5910.6  | 75.5  | 35 | ATPase, Ca++ transporting, ubiquitous                                            | ATP2A3   |

|             |         |        |         |       |    |                                                                            |           |
|-------------|---------|--------|---------|-------|----|----------------------------------------------------------------------------|-----------|
| 209464_at   | 1253.5  | 825.7  | 1454.9  | 84.5  | 35 | aurora kinase B                                                            | AURKB     |
| 211647_x_at | 501.3   | 285.6  | 536.8   | 8.4   | 35 | Immunoglobulin heavy constant mu /// Immunoglobulin heavy constant mu      | IGHM      |
| 211998_at   | 10496.3 | 4591.7 | 15151.5 | 702.8 | 35 | H3 histone, family 3B (H3.3B)                                              | H3F3B     |
| 212142_at   | 1054.9  | 612.5  | 1543.4  | 69.3  | 35 | MCM4 minichromosome maintenance deficient 4 (S. cerevisiae)                | MCM4      |
| 213691_at   | 365.7   | 283.3  | 623.9   | 24.4  | 35 | ---                                                                        | ---       |
| 200810_s_at | 4607    | 3204.4 | 9656.1  | 380.4 | 35 | cold inducible RNA binding protein                                         | CIRBP     |
| 201006_at   | 375.3   | 235.7  | 940.5   | 8.9   | 35 | peroxiredoxin 2                                                            | PRDX2     |
| 208704_x_at | 3138    | 2390.2 | 6336.7  | 329   | 35 | amyloid beta (A4) precursor-like protein 2                                 | APLP2     |
| 214970_s_at | 151.6   | 83.9   | 396.6   | 3.1   | 35 | ST6 beta-galactosamide alpha-2,6-sialyltransferase 1                       | ST6GAL1   |
| 41577_at    | 756.4   | 535.7  | 4896.8  | 15.2  | 35 | protein phosphatase 1, regulatory (inhibitor) subunit 16B                  | PPP1R16B  |
| 200853_at   | 11838.3 | 7861.6 | 13501   | 1153  | 35 | H2A histone family, member Z                                               | H2AFZ     |
| 204612_at   | 578.4   | 413.9  | 864.9   | 14.9  | 35 | protein kinase (cAMP-dependent, catalytic) inhibitor alpha                 | PKIA      |
| 205406_s_at | 280.5   | 215.1  | 477.6   | 4.1   | 35 | sperm autoantigenic protein 17                                             | SPA17     |
| 208918_s_at | 1625.2  | 1160.2 | 1821    | 66.2  | 35 | NAD kinase                                                                 | NADK      |
| 212700_x_at | 382.6   | 287.1  | 543.5   | 19.2  | 35 | pleckstrin homology domain containing, family M (with RUN domain) member 1 | PLEKHM1   |
| 213229_at   | 1470.2  | 945.1  | 2296.5  | 38.7  | 35 | Dicer1, Dcr-1 homolog (Drosophila)                                         | DICER1    |
| 214405_at   | 299.6   | 112.6  | 432.8   | 3.9   | 35 | CUG triplet repeat, RNA binding protein 2                                  | CUGBP2    |
| 215984_s_at | 360.6   | 181.1  | 484.1   | 9.6   | 35 | ADP-ribosylation factor related protein 1                                  | ARFRP1    |
| 216101_at   | 338.3   | 223.6  | 553.7   | 12.7  | 35 | Hypothetical protein LOC283755                                             | LOC283755 |
| 222366_at   | 1123.1  | 633.7  | 1108.5  | 107.5 | 35 | Activity-dependent neuroprotector                                          | ADNP      |
| 209053_s_at | 1604.8  | 927.6  | 3584.9  | 27.4  | 35 | Wolf-Hirschhorn syndrome candidate 1                                       | WHSC1     |
| 217784_at   | 442.5   | 209.6  | 2269.5  | 16.8  | 35 | SNARE protein Ykt6                                                         | YKT6      |
| 210279_at   | 1545.9  | 595.5  | 3675    | 9.7   | 35 | G protein-coupled receptor 18                                              | GPR18     |
| 219785_s_at | 152.6   | 84.4   | 584.7   | 3.9   | 35 | F-box protein 31                                                           | FBXO31    |
| 41397_at    | 321.1   | 264.6  | 939.1   | 12.2  | 35 | hypothetical protein LOC55565                                              | LOC55565  |
| 220799_at   | 139.2   | 44.1   | 500.8   | 2.7   | 35 | glial cells missing homolog 2 (Drosophila)                                 | GCM2      |
| 208072_s_at | 4341.9  | 2975.7 | 14061.5 | 145.3 | 35 | diacylglycerol kinase, delta 130kDa                                        | DGKD      |
| 213580_at   | 96      | 72.6   | 341.5   | 3     | 35 | ---                                                                        | ---       |
| 220842_at   | 104.2   | 82.3   | 458.1   | 4.6   | 35 | Abelson helper integration site                                            | AHI1      |
| 220450_at   | 706.7   | 410.9  | 2373.9  | 13    | 35 | ---                                                                        | ---       |
| 210932_s_at | 157.8   | 61.9   | 314.6   | 3     | 34 | ring finger protein (C3H2C3 type) 6                                        | RNF6      |
| 212079_s_at | 714.5   | 393.5  | 900.7   | 6.9   | 34 | myeloid/lymphoid or mixed-lineage leukemia (trithorax homolog, Drosophila) | MLL       |
| 213036_x_at | 6399.2  | 4049.5 | 6841.1  | 79.3  | 34 | ATPase, Ca++ transporting, ubiquitous                                      | ATP2A3    |
| 213726_x_at | 7796.1  | 5120   | 13306.9 | 910.2 | 34 | tubulin, beta, 2                                                           | TUBB2     |

|             |         |         |         |       |    |                                                                                  |                       |
|-------------|---------|---------|---------|-------|----|----------------------------------------------------------------------------------|-----------------------|
| 214041_x_at | 6122.7  | 1995.5  | 4462.5  | 365.8 | 34 | Ribosomal protein L37a                                                           | RPL37A                |
| 214463_x_at | 1049.2  | 311     | 1545.7  | 16.6  | 34 | histone 1, H4k /// histone 1, H4j                                                | HIST1H4K /// HIST1H4J |
| 214557_at   | 170.5   | 55.5    | 277.9   | 2.4   | 34 | pituitary tumor-transforming 2                                                   | PTTG2                 |
| 215339_at   | 149.9   | 25.5    | 249.9   | 1.4   | 34 | natural killer-tumor recognition sequence                                        | NKTR                  |
| 222352_at   | 327.4   | 242.8   | 480.9   | 12.4  | 34 | F-box protein 31                                                                 | FBXO31                |
| 205003_at   | 222.6   | 145.7   | 554.2   | 3.2   | 34 | dedicator of cytokinesis 4                                                       | DOCK4                 |
| 210610_at   | 235.6   | 157     | 554.7   | 15.4  | 34 | carcinoembryonic antigen-related cell adhesion molecule 1 (biliary glycoprotein) | CEACAM1               |
| 212019_at   | 180.4   | 108.3   | 415.5   | 2.8   | 34 | ribosomal L1 domain containing 1                                                 | RSL1D1                |
| 213674_x_at | 2559.9  | 1457.1  | 7346.2  | 20.9  | 34 | immunoglobulin heavy constant delta                                              | IGHD                  |
| 217697_at   | 169     | 105.4   | 535.4   | 2.7   | 34 | FYN oncogene related to SRC, FGR, YES                                            | FYN                   |
| 205301_s_at | 112.2   | 99.8    | 329.2   | 6.8   | 34 | 8-oxoguanine DNA glycosylase                                                     | OGG1                  |
| 218949_s_at | 3172.1  | 2003.8  | 7319.2  | 179.9 | 34 | glutaminyl-tRNA synthase (glutamine-hydrolyzing)-like 1                          | QRSL1                 |
| 201498_at   | 2576.2  | 1649.1  | 2581.9  | 338   | 34 | Unknown protein                                                                  | USP7                  |
| 201678_s_at | 3884.7  | 2665.8  | 3904    | 398.1 | 34 | DC12 protein                                                                     | DC12                  |
| 215581_s_at | 554.5   | 340.7   | 728.1   | 5.6   | 34 | MCM3 minichromosome maintenance deficient 3 (S. cerevisiae) associated protein   | MCM3AP                |
| 220018_at   | 412.3   | 263.1   | 462.6   | 4.9   | 34 | Cas-Br-M (murine) ecotropic retroviral transforming sequence-like 1              | CBLL1                 |
| 220286_at   | 354.5   | 271     | 686.7   | 18.3  | 34 | myotubularin related protein 10                                                  | MTMR10                |
| 222150_s_at | 3354    | 1546.8  | 3922.1  | 23.6  | 34 | hypothetical protein LOC54103                                                    | LOC54103              |
| 66053_at    | 271.2   | 83.3    | 409.2   | 4.2   | 34 | heterogeneous nuclear ribonucleoprotein U-like 2                                 | HNRPUL2               |
| 204947_at   | 723.2   | 647     | 1959.6  | 45.5  | 34 | E2F transcription factor 1                                                       | E2F1                  |
| 215006_at   | 1050.5  | 675.3   | 2162    | 55.9  | 34 | ---                                                                              | ---                   |
| 220328_at   | 168.9   | 122.6   | 339.6   | 4.4   | 34 | polyhomeotic like 3 (Drosophila)                                                 | PHC3                  |
| 221976_s_at | 149.4   | 108.1   | 825.1   | 5.5   | 34 | Hepatoma-derived growth factor, related protein 3                                | HDGFRP3               |
| 202387_at   | 1578.7  | 1163.7  | 8122.2  | 230.8 | 34 | BCL2-associated athanogene /// BCL2-associated athanogene                        | BAG1                  |
| 203760_s_at | 923.5   | 364.7   | 2249.3  | 14.1  | 34 | Src-like-adaptor /// Src-like-adaptor                                            | SLA                   |
| 204324_s_at | 181.4   | 92.4    | 623     | 7.3   | 34 | golgi phosphoprotein 4                                                           | GOLPH4                |
| 221276_s_at | 163.9   | 135.8   | 455.1   | 4.3   | 34 | syncoilin, intermediate filament 1 /// syncoilin, intermediate filament 1        | SYNC1                 |
| 215407_s_at | 96.3    | 67.7    | 288.5   | 4.4   | 34 | astrotactin 2                                                                    | ASTN2                 |
| 210393_at   | 418.7   | 136.2   | 3640.2  | 12.5  | 34 | leucine-rich repeat-containing G protein-coupled receptor 5                      | LGR5                  |
| 200671_s_at | 1392.9  | 702.6   | 2278.6  | 8.7   | 34 | spectrin, beta, non-erythrocytic 1                                               | SPTBN1                |
| 202589_at   | 17240.3 | 13462.3 | 20596.6 | 380.9 | 34 | thymidylate synthetase                                                           | TYMS                  |
| 203742_s_at | 743     | 677.9   | 1213.6  | 7     | 34 | thymine-DNA glycosylase                                                          | TDG                   |



|             |         |         |         |        |    |                                                                                                                                 |               |
|-------------|---------|---------|---------|--------|----|---------------------------------------------------------------------------------------------------------------------------------|---------------|
| 219624_at   | 223.1   | 129.3   | 345.4   | 5.6    | 34 | BCL2-associated athanogene 4                                                                                                    | BAG4          |
| 76897_s_at  | 236.7   | 80.5    | 371.7   | 3.4    | 34 | KIAA0674                                                                                                                        | KIAA0674      |
| 204826_at   | 534.2   | 443.9   | 1446.3  | 37.3   | 34 | cyclin F                                                                                                                        | CCNF          |
| 210517_s_at | 3300.7  | 1353.1  | 9242.7  | 11     | 34 | A kinase (PRKA) anchor protein (gravin) 12                                                                                      | AKAP12        |
| 211039_at   | 168.1   | 70.9    | 868.7   | 7      | 34 | cholinergic receptor, nicotinic, alpha polypeptide 1 (muscle) /// cholinergic receptor, nicotinic, alpha polypeptide 1 (muscle) | CHRNA1        |
| 219778_at   | 102.8   | 76.6    | 310.6   | 2.8    | 34 | zinc finger protein, multitype 2                                                                                                | ZFPM2         |
| 207573_x_at | 11632.8 | 10131.6 | 12633.1 | 2167.8 | 33 | ATP synthase, H+ transporting, mitochondrial F0 complex, subunit g                                                              | ATP5L         |
| 211919_s_at | 29614.3 | 23208.6 | 54252.2 | 1497.1 | 33 | chemokine (C-X-C motif) receptor 4 /// chemokine (C-X-C motif) receptor 4                                                       | CXCR4         |
| 211936_at   | 9520.1  | 4084.9  | 9404.7  | 325.9  | 33 | heat shock 70kDa protein 5 (glucose-regulated protein, 78kDa)                                                                   | HSPA5         |
| 219876_s_at | 314.1   | 140     | 513.2   | 9      | 33 | hypothetical protein DKFZp434M0331                                                                                              | DKFZp434M0331 |
| 221557_s_at | 728.3   | 173.4   | 1429.9  | 6.4    | 33 | lymphoid enhancer-binding factor 1                                                                                              | LEF1          |
| 201085_s_at | 3189.8  | 1357.3  | 13637.2 | 73     | 33 | SON DNA binding protein                                                                                                         | SON           |
| 201586_s_at | 8569.9  | 5652.5  | 17622.8 | 1201.6 | 33 | splicing factor proline/glutamine-rich (polypyrimidine tract binding protein associated)                                        | SFPQ          |
| 212733_at   | 2061.3  | 1548.7  | 5477    | 216.4  | 33 | KIAA0226                                                                                                                        | KIAA0226      |
| 217930_s_at | 284.2   | 214.8   | 636.1   | 9.5    | 33 | toll interacting protein                                                                                                        | TOLLIP        |
| 202509_s_at | 258     | 105.5   | 790.5   | 11.1   | 33 | tumor necrosis factor, alpha-induced protein 2                                                                                  | TNFAIP2       |
| 209936_at   | 357.6   | 274.7   | 869.6   | 6.4    | 33 | RNA binding motif protein 5                                                                                                     | RBM5          |
| 214284_s_at | 193     | 132     | 753.1   | 5.6    | 33 | Fibroblast growth factor 18                                                                                                     | FGF18         |
| 215820_x_at | 210.4   | 160     | 460.9   | 5.9    | 33 | sorting nexin 13                                                                                                                | SNX13         |
| 206700_s_at | 1479.6  | 229     | 4109.1  | 15.1   | 33 | Smcy homolog, Y-linked (mouse)                                                                                                  | SMCY          |
| 204262_s_at | 194     | 123.5   | 506.5   | 7.3    | 33 | presenilin 2 (Alzheimer disease 4)                                                                                              | PSEN2         |
| 204049_s_at | 168.2   | 135.5   | 479.6   | 7.5    | 33 | phosphatase and actin regulator 2                                                                                               | PHACTR2       |
| 207781_s_at | 194.5   | 118.1   | 751     | 1.1    | 33 | zinc finger protein 6 (CMPX1)                                                                                                   | ZNF6          |
| 205712_at   | 235.6   | 181     | 1105.9  | 6.4    | 33 | protein tyrosine phosphatase, receptor type, D                                                                                  | PTPRD         |
| 204114_at   | 864.4   | 304.3   | 4631.7  | 12     | 33 | nidogen 2 (osteonidogen)                                                                                                        | NID2          |
| 202412_s_at | 2463.6  | 945.5   | 1998.4  | 58.6   | 33 | ubiquitin specific peptidase 1                                                                                                  | USP1          |
| 202575_at   | 280.6   | 207.3   | 482     | 13.4   | 33 | cellular retinoic acid binding protein 2                                                                                        | CRABP2        |
| 205249_at   | 225.3   | 75.4    | 367.7   | 11.7   | 33 | early growth response 2 (Krox-20 homolog, Drosophila)                                                                           | EGR2          |
| 219237_s_at | 509.8   | 349.6   | 583.8   | 10     | 33 | DnaJ (Hsp40) homolog, subfamily B, member 14                                                                                    | DNAJB14       |
| 203331_s_at | 1079.1  | 847.9   | 2665.7  | 30.2   | 33 | inositol polyphosphate-5-phosphatase, 145kDa                                                                                    | INPP5D        |
| 214615_at   | 257.5   | 190.8   | 516.5   | 7.4    | 33 | purinergic receptor P2Y, G-protein coupled, 10                                                                                  | P2RY10        |

|             |        |        |         |       |    |                                                                                   |          |
|-------------|--------|--------|---------|-------|----|-----------------------------------------------------------------------------------|----------|
| 205632_s_at | 1124.2 | 750.9  | 2645.1  | 88.4  | 33 | phosphatidylinositol-4-phosphate 5-kinase, type I, beta                           | PIP5K1B  |
| 214984_at   | 147.5  | 93.4   | 521.2   | 2     | 33 | PI-3-kinase-related kinase SMG-1                                                  | SMG1     |
| 202732_at   | 876.3  | 589.3  | 2260.7  | 28.7  | 33 | protein kinase (cAMP-dependent, catalytic) inhibitor gamma                        | PKIG     |
| 213538_at   | 2967.3 | 1774.4 | 9703.8  | 472.3 | 33 | SON DNA binding protein                                                           | SON      |
| 210592_s_at | 4102.2 | 3018.5 | 15575.9 | 276.3 | 33 | spermidine/spermine N1-acetyltransferase                                          | SAT      |
| 214254_at   | 118.5  | 73.8   | 391.7   | 4.1   | 33 | melanoma antigen family A, 4                                                      | MAGEA4   |
| 209465_x_at | 88.2   | 60.5   | 352.3   | 3.3   | 33 | pleiotrophin (heparin binding growth factor 8, neurite growth-promoting factor 1) | PTN      |
| 221980_at   | 140    | 114.6  | 428.9   | 12.9  | 33 | Elastin microfibril interfacier 2                                                 | EMILIN2  |
| 205617_at   | 348.8  | 147.5  | 454.9   | 6.4   | 33 | proline rich Gla (G-carboxyglutamic acid) 2                                       | PRRG2    |
| 212382_at   | 4841.3 | 2575.4 | 7602.8  | 80.3  | 33 | Transcription factor 4                                                            | TCF4     |
| 213146_at   | 580.7  | 260.3  | 1033.7  | 9.3   | 33 | ---                                                                               | ---      |
| 215016_x_at | 293    | 100.3  | 581.8   | 4.1   | 33 | dystonin                                                                          | DST      |
| 215464_s_at | 1495.7 | 546    | 891     | 15.1  | 33 | Tax1 (human T-cell leukemia virus type I) binding protein 3                       | TAX1BP3  |
| 219233_s_at | 742.2  | 542    | 1209.2  | 18.8  | 33 | gasdermin-like                                                                    | GSDML    |
| 220843_s_at | 286.7  | 139.9  | 402.3   | 5.6   | 33 | WD repeats and SOF1 domain containing                                             | WDSOF1   |
| 206566_at   | 139.4  | 84.4   | 328.6   | 3.9   | 33 | solute carrier family 7 (cationic amino acid transporter, y+ system), member 1    | SLC7A1   |
| 209037_s_at | 441.2  | 245.2  | 1038.9  | 9.6   | 33 | EH-domain containing 1                                                            | EHD1     |
| 204525_at   | 119.9  | 94.7   | 373.2   | 1.3   | 33 | PHD finger protein 14                                                             | PHF14    |
| 207604_s_at | 498.4  | 299.6  | 1302.9  | 6     | 33 | solute carrier family 4, sodium bicarbonate cotransporter, member 7               | SLC4A7   |
| 218480_at   | 322.2  | 291.5  | 680.8   | 22.7  | 33 | hypothetical protein FLJ21839                                                     | FLJ21839 |
| 215112_x_at | 62.4   | 14.6   | 597.2   | 0.3   | 33 | MCF.2 cell line derived transforming sequence-like 2                              | MCF2L2   |
| 207462_at   | 263    | 165.5  | 1053.3  | 5.7   | 33 | glycine receptor, alpha 2                                                         | GLRA2    |
| 207334_s_at | 239.9  | 113.8  | 971.7   | 5.8   | 33 | transforming growth factor, beta receptor II (70/80kDa)                           | TGFBR2   |
| 220570_at   | 180.4  | 89.6   | 3075.1  | 7     | 33 | resistin                                                                          | RETN     |
| 213745_at   | 87.6   | 50.3   | 363.4   | 2.4   | 33 | attractin-like 1                                                                  | ATRNL1   |
| 202533_s_at | 711    | 317.8  | 704.1   | 12.5  | 32 | dihydrofolate reductase                                                           | DHFR     |
| 203795_s_at | 3293   | 2438.1 | 5241.7  | 239.2 | 32 | B-cell CLL/lymphoma 7A                                                            | BCL7A    |
| 211200_s_at | 374.4  | 97.7   | 390.5   | 4.4   | 32 | EF-hand calcium binding domain 2                                                  | EFCAB2   |
| 212629_s_at | 983.6  | 762.4  | 1470.6  | 49.1  | 32 | protein kinase N2                                                                 | PKN2     |
| 218262_at   | 765.3  | 563.6  | 1191.6  | 48.3  | 32 | hypothetical protein FLJ22318                                                     | FLJ22318 |
| 218802_at   | 2316.7 | 1822.3 | 2483.5  | 42.4  | 32 | hypothetical protein FLJ20647                                                     | FLJ20647 |
| 222032_s_at | 461.1  | 241.6  | 508.1   | 13.7  | 32 | Unknown protein                                                                   | USP7     |
| 206997_s_at | 210.7  | 71.6   | 498.5   | 7.4   | 32 | heparan sulfate 6-O-sulfotransferase 1                                            | HS6ST1   |
| 213922_at   | 481.2  | 199.2  | 1028.1  | 2.3   | 32 | tau tubulin kinase 2                                                              | TTBK2    |

|             |        |        |         |       |    |                                                                                 |               |
|-------------|--------|--------|---------|-------|----|---------------------------------------------------------------------------------|---------------|
| 60084_at    | 281    | 130    | 624.4   | 5     | 32 | cylindromatosis (turban tumor syndrome)                                         | CYLD          |
| 207712_at   | 163    | 88     | 395.3   | 4     | 32 | B melanoma antigen                                                              | BAGE          |
| 216709_at   | 153.8  | 103.2  | 482.7   | 6.5   | 32 | Hypothetical gene supported by BC013370; BC034583                               | LOC400655     |
| 205385_at   | 124.8  | 79.1   | 691.4   | 8.7   | 32 | Mdm2, transformed 3T3 cell double minute 2, p53 binding protein (mouse)         | MDM2          |
| 209524_at   | 432.4  | 154.3  | 1100.3  | 3.9   | 32 | hepatoma-derived growth factor, related protein 3                               | HDGFRP3       |
| 204688_at   | 283.8  | 139.5  | 1709.8  | 5.6   | 32 | sarcoglycan, epsilon                                                            | SGCE          |
| 212092_at   | 323.4  | 177.7  | 27725.6 | 6.4   | 32 | paternally expressed 10                                                         | PEG10         |
| 203317_at   | 1832.1 | 859.6  | 1426.6  | 133.2 | 32 | pleckstrin and Sec7 domain containing 4                                         | PSD4          |
| 204335_at   | 487.2  | 62.9   | 856     | 8.4   | 32 | hypothetical protein FLJ10374                                                   | FLJ10374      |
| 208548_at   | 162.5  | 66.9   | 324.4   | 3.4   | 32 | interferon, alpha 6                                                             | IFNA6         |
| 208608_s_at | 337.6  | 133.3  | 587.1   | 10.4  | 32 | syntrophin, beta 1 (dystrophin-associated protein A1, 59kDa, basic component 1) | SNTB1         |
| 214305_s_at | 4659   | 3426.8 | 5099.6  | 498.5 | 32 | splicing factor 3b, subunit 1, 155kDa                                           | SF3B1         |
| 214744_s_at | 279.8  | 117.4  | 349.2   | 7.6   | 32 | Similar to Zgc:73149 protein                                                    | LOC442209     |
| 219814_at   | 450.4  | 149.4  | 788.7   | 10    | 32 | muscleblind-like 3 (Drosophila)                                                 | MBNL3         |
| 205840_x_at | 798.1  | 421.9  | 2064.1  | 14.2  | 32 | growth hormone 1                                                                | GH1           |
| 210961_s_at | 171.3  | 91.8   | 415.9   | 3.7   | 32 | adrenergic, alpha-1D-, receptor                                                 | ADRA1D        |
| 211192_s_at | 431    | 237.8  | 881.3   | 8.3   | 32 | CD84 antigen (leukocyte antigen)                                                | CD84          |
| 213799_s_at | 370.5  | 198.3  | 755     | 14.3  | 32 | protein tyrosine phosphatase, receptor type, A                                  | PTPRA         |
| 220729_at   | 151.5  | 60.7   | 336.3   | 2.6   | 32 | ---                                                                             | ---           |
| 207238_s_at | 2281.5 | 1823   | 5647.1  | 43.2  | 32 | protein tyrosine phosphatase, receptor type, C                                  | PTPRC         |
| 214971_s_at | 275.6  | 125.8  | 787.6   | 7.8   | 32 | ST6 beta-galactosamide alpha-2,6-sialyltransferase 1                            | ST6GAL1       |
| 213988_s_at | 943.7  | 577.2  | 4736.9  | 24.4  | 32 | spermidine/spermine N1-acetyltransferase                                        | SAT           |
| 201584_s_at | 5701.3 | 3803.1 | 5988.4  | 552.8 | 31 | DEAD (Asp-Glu-Ala-Asp) box polypeptide 39                                       | DDX39         |
| 205308_at   | 426.6  | 135.5  | 505.4   | 3.9   | 31 | chromosome 8 open reading frame 70                                              | C8orf70       |
| 208977_x_at | 9681.2 | 5369.7 | 14888.5 | 972   | 31 | tubulin, beta, 2                                                                | TUBB2         |
| 210466_s_at | 5244.2 | 3388   | 6177    | 820.6 | 31 | SERPINE1 mRNA binding protein 1                                                 | SERBP1        |
| 213725_x_at | 1418.9 | 780.6  | 1815.3  | 69.9  | 31 | hypothetical protein LOC283824                                                  | LOC283824     |
| 218176_at   | 1009.6 | 548.2  | 1460.3  | 10.6  | 31 | melanoma antigen family F, 1                                                    | MAGEF1        |
| 41037_at    | 189.6  | 101.1  | 356.3   | 6.6   | 31 | TEA domain family member 4                                                      | TEAD4         |
| 207470_at   | 181.1  | 83.8   | 435.3   | 3.2   | 31 | hypothetical protein DKFZp566H0824                                              | DKFZp566H0824 |
| 209083_at   | 3910.9 | 3369.5 | 9674.6  | 516.6 | 31 | coronin, actin binding protein, 1A                                              | CORO1A        |
| 210741_at   | 116    | 54.2   | 258.8   | 2.9   | 31 | Rho guanine nucleotide exchange factor (GEF) 12                                 | ARHGEF12      |
| 219106_s_at | 83.2   | 24.4   | 781.6   | 1.2   | 31 | kelch repeat and BTB (POZ) domain containing 10                                 | KBTBD10       |
| 33646_g_at  | 325.7  | 251.1  | 1119.4  | 4.5   | 31 | GM2 ganglioside activator                                                       | GM2A          |

|             |        |        |         |       |    |                                                                                                                                                                                                       |                                                                                                               |
|-------------|--------|--------|---------|-------|----|-------------------------------------------------------------------------------------------------------------------------------------------------------------------------------------------------------|---------------------------------------------------------------------------------------------------------------|
|             |        |        |         |       |    |                                                                                                                                                                                                       | LOC23117 ///<br>DKFZp547E0<br>87 ///<br>LOC348162<br>///<br>LOC388221<br>///<br>LOC440345<br>///<br>LOC440354 |
| 215002_at   | 116.2  | 32     | 583.2   | 2     | 31 | KIAA0220-like protein /// hypothetical gene LOC283846 ///<br>hypothetical protein 348162 /// NPIP-like locus ///<br>hypothetical protein LOC440345 /// PI-3-kinase-related<br>kinase SMG-1 pseudogene |                                                                                                               |
| 209526_s_at | 622.2  | 426.6  | 1995    | 9.3   | 31 | hepatoma-derived growth factor, related protein 3                                                                                                                                                     | HDGFRP3                                                                                                       |
| 201005_at   | 6598.1 | 4694.1 | 25569.7 | 11.4  | 31 | CD9 antigen (p24)                                                                                                                                                                                     | CD9                                                                                                           |
| 206247_at   | 1394.4 | 1038.9 | 1334.3  | 166.5 | 31 | MHC class I polypeptide-related sequence B                                                                                                                                                            | MICB                                                                                                          |
| 212315_s_at | 453.7  | 257.2  | 856.9   | 11.4  | 31 | nucleoporin 210kDa                                                                                                                                                                                    | NUP210                                                                                                        |
| 215855_s_at | 732.8  | 504.4  | 1338.6  | 36.5  | 31 | TATA element modulatory factor 1                                                                                                                                                                      | TMF1                                                                                                          |
| 218992_at   | 547.1  | 338.7  | 925.8   | 19.4  | 31 | chromosome 9 open reading frame 46                                                                                                                                                                    | C9orf46                                                                                                       |
| 222023_at   | 270    | 146.6  | 382     | 3.6   | 31 | A kinase (PRKA) anchor protein 13                                                                                                                                                                     | AKAP13                                                                                                        |
| 207829_s_at | 305.8  | 252.4  | 665.6   | 31.3  | 31 | BCL2/adenovirus E1B 19kDa interacting protein 1                                                                                                                                                       | BNIP1                                                                                                         |
| 215728_s_at | 353.9  | 258.2  | 713.1   | 16.8  | 31 | acyl-CoA thioesterase 7                                                                                                                                                                               | ACOT7                                                                                                         |
| 218279_s_at | 217.1  | 138.9  | 700.8   | 3.3   | 31 | histone 2, H2aa                                                                                                                                                                                       | HIST2H2AA                                                                                                     |
| 220623_s_at | 152.1  | 108.2  | 339.2   | 4.7   | 31 | testis specific, 10                                                                                                                                                                                   | TSGA10                                                                                                        |
| 203245_s_at | 253.2  | 176    | 590.9   | 10.2  | 31 | FLJ35348                                                                                                                                                                                              | FLJ35348                                                                                                      |
| 203298_s_at | 2224.3 | 1657   | 4931.3  | 308.5 | 31 | Jumonji, AT rich interactive domain 2                                                                                                                                                                 | JARID2                                                                                                        |
| 208622_s_at | 8534.4 | 2241.9 | 17271.3 | 137.7 | 31 | villin 2 (ezrin)                                                                                                                                                                                      | VIL2                                                                                                          |
| 209388_at   | 861.1  | 717.7  | 2495.3  | 65.9  | 31 | poly(A) polymerase alpha                                                                                                                                                                              | PAPOLA                                                                                                        |
| 222074_at   | 197.2  | 71.6   | 1101.8  | 2.2   | 31 | uroporphyrinogen decarboxylase                                                                                                                                                                        | UROD                                                                                                          |
| 211299_s_at | 235.5  | 221.3  | 561.1   | 9.5   | 31 | flotillin 2                                                                                                                                                                                           | FLOT2                                                                                                         |
| 214240_at   | 152.7  | 133.8  | 416.1   | 9.6   | 31 | galanin                                                                                                                                                                                               | GAL                                                                                                           |
| 215037_s_at | 900.5  | 530.2  | 6759    | 19.6  | 31 | BCL2-like 1                                                                                                                                                                                           | BCL2L1                                                                                                        |
| 215163_at   | 177.2  | 41.2   | 971.9   | 4.6   | 31 | ---                                                                                                                                                                                                   | ---                                                                                                           |
| 215694_at   | 113.4  | 92.2   | 345     | 3.2   | 31 | spermatogenesis associated 5-like 1                                                                                                                                                                   | SPATA5L1                                                                                                      |
| 219073_s_at | 282.2  | 200.3  | 1001.9  | 3.4   | 31 | oxysterol binding protein-like 10                                                                                                                                                                     | OSBPL10                                                                                                       |
| 214337_at   | 63.6   | 30.2   | 363.5   | 1.6   | 31 | coatamer protein complex, subunit alpha                                                                                                                                                               | COPA                                                                                                          |
| 207339_s_at | 2085.6 | 1712.7 | 24613.4 | 77.1  | 31 | lymphotoxin beta (TNF superfamily, member 3)                                                                                                                                                          | LTB                                                                                                           |
| 201580_s_at | 1692.5 | 1189.9 | 1675.7  | 160.3 | 31 | thioredoxin domain containing 13                                                                                                                                                                      | TXNDC13                                                                                                       |
| 201694_s_at | 2112.8 | 467.7  | 3888.6  | 23.7  | 31 | early growth response 1                                                                                                                                                                               | EGR1                                                                                                          |
| 207999_s_at | 667.3  | 514.6  | 836     | 69.8  | 31 | adenosine deaminase, RNA-specific, B1 (RED1 homolog<br>rat)                                                                                                                                           | ADARB1                                                                                                        |
| 212744_at   | 279.5  | 267    | 498.4   | 11    | 31 | Bardet-Biedl syndrome 4                                                                                                                                                                               | BBS4                                                                                                          |

|             |        |        |        |       |    |                                                                              |          |
|-------------|--------|--------|--------|-------|----|------------------------------------------------------------------------------|----------|
| 212810_s_at | 873.7  | 577.3  | 931.9  | 28.4  | 31 | solute carrier family 1 (glutamate/neutral amino acid transporter), member 4 | SLC1A4   |
| 217203_at   | 192.4  | 68.4   | 327.3  | 3.5   | 31 | ---                                                                          | ---      |
| 217893_s_at | 1798.4 | 767.9  | 2805.8 | 20.5  | 31 | chromosome 1 open reading frame 108                                          | C1orf108 |
| 220529_at   | 580.9  | 275.3  | 598.2  | 22.9  | 31 | hypothetical protein FLJ11710                                                | FLJ11710 |
| 221436_s_at | 693.1  | 377.3  | 1276.4 | 10    | 31 | cell division cycle associated 3 /// cell division cycle associated 3        | CDCA3    |
| 206919_at   | 185.6  | 109.2  | 552.5  | 3     | 31 | ELK4, ETS-domain protein (SRF accessory protein 1)                           | ELK4     |
| 210928_at   | 179.2  | 64.4   | 491.1  | 6.8   | 31 | CCR4-NOT transcription complex, subunit 2                                    | CNOT2    |
| 217602_at   | 183    | 98.6   | 704.3  | 3.7   | 31 | peptidylprolyl isomerase A (cyclophilin A)                                   | PPIA     |
| 213523_at   | 555.5  | 373.4  | 1967.5 | 13.8  | 31 | cyclin E1                                                                    | CCNE1    |
| 204362_at   | 872    | 628.3  | 3033.3 | 9.9   | 31 | src family associated phosphoprotein 2                                       | SCAP2    |
| 204686_at   | 255    | 163.7  | 1166.5 | 5.3   | 31 | insulin receptor substrate 1                                                 | IRS1     |
| 214627_at   | 398    | 173.9  | 5293.7 | 16.9  | 31 | eosinophil peroxidase                                                        | EPX      |
| 215139_at   | 95.2   | 54.9   | 314.1  | 3.6   | 31 | Rho guanine nucleotide exchange factor (GEF) 10                              | ARHGEF10 |
| 215767_at   | 119    | 73.9   | 582.8  | 4.6   | 31 | chromosome 2 open reading frame 10                                           | C2orf10  |
| 203827_at   | 148.4  | 66.5   | 727    | 3.9   | 31 | WD40 repeat protein Interacting with phospholinositides of 49kDa             | WIPI49   |
| 201364_s_at | 1746.5 | 1321.7 | 2921.9 | 120.9 | 30 | ornithine decarboxylase antizyme 2                                           | OAZ2     |
| 202413_s_at | 4532.3 | 3194.3 | 4483.5 | 763.6 | 30 | ubiquitin specific peptidase 1                                               | USP1     |
| 202971_s_at | 851    | 538    | 1188.6 | 8.7   | 30 | dual-specificity tyrosine-(Y)-phosphorylation regulated kinase 2             | DYRK2    |
| 205367_at   | 2237.6 | 1328.9 | 3421.3 | 68.2  | 30 | adaptor protein with pleckstrin homology and src homology 2 domains          | APS      |
| 208076_at   | 558.8  | 407.3  | 705.1  | 12.5  | 30 | histone 1, H4d                                                               | HIST1H4D |
| 209152_s_at | 3493.2 | 1505.9 | 2674.6 | 248.4 | 30 | transcription factor 3 (E2A immunoglobulin enhancer binding factors E12/E47) | TCF3     |
| 212525_s_at | 908.7  | 543.6  | 1204.8 | 13.5  | 30 | H2A histone family, member X                                                 | H2AFX    |
| 215024_at   | 355.8  | 228.8  | 464.7  | 9     | 30 | chromosome 7 open reading frame 28B                                          | C7orf28B |
| 219426_at   | 570    | 329.1  | 586.4  | 42.2  | 30 | eukaryotic translation initiation factor 2C, 3                               | EIF2C3   |
| 222349_x_at | 185.8  | 110.7  | 350.5  | 8.6   | 30 | ring finger protein 126 pseudogene 1                                         | RNF126P1 |
| 204935_at   | 112.6  | 32.6   | 258.5  | 1.9   | 30 | protein tyrosine phosphatase, non-receptor type 2                            | PTPN2    |
| 215992_s_at | 226.5  | 128.2  | 899.5  | 7.8   | 30 | Rap guanine nucleotide exchange factor (GEF) 2                               | RAPGEF2  |
| 209967_s_at | 134.8  | 43     | 415.7  | 5.5   | 30 | cAMP responsive element modulator                                            | CREM     |
| 204286_s_at | 1054.4 | 645.4  | 6785.1 | 27    | 30 | phorbol-12-myristate-13-acetate-induced protein 1                            | PMAIP1   |
| 206390_x_at | 349.1  | 275    | 5566.7 | 21.4  | 30 | platelet factor 4 (chemokine (C-X-C motif) ligand 4)                         | PF4      |
| 220270_at   | 142.4  | 102.5  | 516.2  | 5.9   | 30 | tudor domain containing 4                                                    | TDRD4    |
| 204396_s_at | 363.5  | 249.8  | 3619.7 | 4.4   | 30 | G protein-coupled receptor kinase 5                                          | GRK5     |
| 202305_s_at | 1106   | 859.8  | 1483.6 | 59.9  | 30 | fasciculation and elongation protein zeta 2 (zygin II)                       | FEZ2     |
| 203297_s_at | 3578.4 | 2269.2 | 4416   | 249.5 | 30 | Jumonji, AT rich interactive domain 2                                        | JARID2   |

|             |        |        |        |       |    |                                                                                                                  |                                              |
|-------------|--------|--------|--------|-------|----|------------------------------------------------------------------------------------------------------------------|----------------------------------------------|
| 203311_s_at | 1645.4 | 1021.3 | 3135   | 78.6  | 30 | ADP-ribosylation factor 6                                                                                        | ARF6                                         |
| 206965_at   | 214.2  | 122.3  | 370.6  | 3.3   | 30 | Kruppel-like factor 12                                                                                           | KLF12                                        |
| 208903_at   | 848.2  | 783.6  | 1237.4 | 131.2 | 30 | Ribosomal protein S28                                                                                            | RPS28                                        |
| 210050_at   | 282.7  | 138    | 358.7  | 6.7   | 30 | triosephosphate isomerase 1                                                                                      | TPI1                                         |
| 214656_x_at | 1723.7 | 865.9  | 1324.6 | 76.4  | 30 | myosin IC                                                                                                        | MYO1C                                        |
| 218913_s_at | 1248   | 564.4  | 1373.8 | 39.5  | 30 | GEM interacting protein                                                                                          | GMIP                                         |
| 219840_s_at | 837.2  | 186.2  | 1234.8 | 8     | 30 | T-cell leukemia/lymphoma 6                                                                                       | TCL6                                         |
| 205350_at   | 194.6  | 78.9   | 417.2  | 8.8   | 30 | cellular retinoic acid binding protein 1                                                                         | CRABP1                                       |
| 206886_x_at | 816.4  | 315.5  | 2779.8 | 7.6   | 30 | growth hormone 1                                                                                                 | GH1                                          |
| 218851_s_at | 212    | 137    | 784.1  | 12.2  | 30 | WD repeat domain 33                                                                                              | WDR33                                        |
| 201593_s_at | 2313.4 | 2053.5 | 5467.5 | 439.2 | 30 | likely ortholog of mouse immediate early response, erythropoietin 4                                              | LEREPO4                                      |
| 215212_at   | 272    | 129.7  | 714.5  | 3.1   | 30 | CDNA FLJ12091 fis, clone HEMBB1002582                                                                            | ---                                          |
| 206361_at   | 220.1  | 126    | 661.1  | 13    | 30 | G protein-coupled receptor 44                                                                                    | GPR44                                        |
| 206489_s_at | 121.6  | 61.4   | 543.2  | 4.5   | 30 | discs, large (Drosophila) homolog-associated protein 1                                                           | DLGAP1                                       |
| 202576_s_at | 828.5  | 524.2  | 1222.5 | 32.9  | 30 | DEAD (Asp-Glu-Ala-As) box polypeptide 19B /// DEAD (Asp-Glu-Ala-As) box polypeptide 19A /// DDX19-DDX19L protein | DDX19B ///<br>DDX19A ///<br>DDX19-<br>DDX19L |
| 204982_at   | 759.2  | 306.6  | 1312   | 18.5  | 30 | G protein-coupled receptor kinase interactor 2                                                                   | GIT2                                         |
| 209181_s_at | 2471.5 | 1445.1 | 3301   | 370.2 | 30 | Rab geranylgeranyltransferase, beta subunit                                                                      | RABGGTB                                      |
| 212119_at   | 1486.3 | 1058.8 | 1840.8 | 181.7 | 30 | ras homolog gene family, member Q                                                                                | RHOQ                                         |
| 213971_s_at | 1705.5 | 1190   | 1646.9 | 278   | 30 | suppressor of zeste 12 homolog (Drosophila)                                                                      | SUZ12                                        |
| 214314_s_at | 247.2  | 109.9  | 261.2  | 1.5   | 30 | eukaryotic translation initiation factor 5B                                                                      | EIF5B                                        |
| 217914_at   | 795.6  | 473.5  | 1574.4 | 36.4  | 30 | two pore segment channel 1                                                                                       | TPCN1                                        |
| 219537_x_at | 612.7  | 151.4  | 710.1  | 10.7  | 30 | delta-like 3 (Drosophila)                                                                                        | DLL3                                         |
| 219892_at   | 406.1  | 301.3  | 693.9  | 12.7  | 30 | transmembrane 6 superfamily member 1                                                                             | TM6SF1                                       |
| 200906_s_at | 196.9  | 84.1   | 443.8  | 5.7   | 30 | palladin                                                                                                         | KIAA0992                                     |
| 213963_s_at | 296.6  | 119.6  | 722.2  | 9.6   | 30 | Sin3A-associated protein, 30kDa                                                                                  | SAP30                                        |
| 33148_at    | 202.2  | 153.4  | 456.9  | 5.9   | 30 | zinc finger RNA binding protein                                                                                  | ZFR                                          |
| 212715_s_at | 313    | 179.1  | 744.1  | 6.8   | 30 | microtubule associated monooxygenase, calponin and LIM domain containing 3                                       | MICAL3                                       |
| 203845_at   | 1062.2 | 644.3  | 5682   | 75.2  | 30 | p300/CBP-associated factor                                                                                       | PCAF                                         |
| 216961_s_at | 162.2  | 126    | 401    | 11.5  | 30 | RPA interacting protein                                                                                          | RIP                                          |
| 219841_at   | 178.9  | 78.2   | 389.7  | 4.2   | 30 | activation-induced cytidine deaminase                                                                            | AICDA                                        |
| 216065_at   | 170.2  | 63.4   | 574.6  | 4.9   | 30 | ---                                                                                                              | ---                                          |

|             |         |        |         |        |    |                                                                                                                                                                                                               |                                                                                           |
|-------------|---------|--------|---------|--------|----|---------------------------------------------------------------------------------------------------------------------------------------------------------------------------------------------------------------|-------------------------------------------------------------------------------------------|
| 220602_s_at | 180     | 97.5   | 579.2   | 6.4    | 30 | hypothetical protein FLJ22795 /// hypothetical protein FLJ90297 /// LOC388161                                                                                                                                 | FLJ22795 ///<br>LOC388152<br>///<br>LOC388161                                             |
| 202391_at   | 2179.6  | 964.3  | 13386.3 | 154.3  | 30 | brain abundant, membrane attached signal protein 1                                                                                                                                                            | BASP1                                                                                     |
| 216260_at   | 100.5   | 73.4   | 440.8   | 4.9    | 30 | Dicer1, Dcr-1 homolog (Drosophila)                                                                                                                                                                            | DICER1                                                                                    |
| 200675_at   | 12263.9 | 7362.2 | 14130.7 | 1142.6 | 29 | CD81 antigen (target of antiproliferative antibody 1)                                                                                                                                                         | CD81                                                                                      |
| 209041_s_at | 876.8   | 610.3  | 1024.8  | 15     | 29 | ubiquitin-conjugating enzyme E2G 2 (UBC7 homolog, yeast)                                                                                                                                                      | UBE2G2                                                                                    |
| 209060_x_at | 1380    | 753.8  | 1224.4  | 112.6  | 29 | nuclear receptor coactivator 3                                                                                                                                                                                | NCOA3                                                                                     |
| 211279_at   | 287.2   | 194.6  | 367.2   | 11     | 29 | nuclear respiratory factor 1                                                                                                                                                                                  | NRF1                                                                                      |
| 212680_x_at | 2180.1  | 1447   | 3705    | 43.5   | 29 | protein phosphatase 1, regulatory (inhibitor) subunit 14B                                                                                                                                                     | PPP1R14B                                                                                  |
| 214338_at   | 292.1   | 245.2  | 539.1   | 11.6   | 29 | DnaJ (Hsp40) homolog, subfamily B, member 12                                                                                                                                                                  | DNAJB12                                                                                   |
| 214838_at   | 911.6   | 592.2  | 1570.7  | 30.9   | 29 | SFT2 domain containing 2                                                                                                                                                                                      | SFT2D2                                                                                    |
| 216350_s_at | 654.8   | 237.3  | 1216.9  | 11.5   | 29 | zinc finger protein 10                                                                                                                                                                                        | ZNF10                                                                                     |
| 78330_at    | 539.8   | 377.5  | 856.9   | 42     | 29 | zinc finger protein 335                                                                                                                                                                                       | ZNF335                                                                                    |
| 211996_s_at | 8974.6  | 6702.7 | 21416.6 | 985.7  | 29 | KIAA0220-like protein /// hypothetical gene LOC283846 /// hypothetical protein 348162 /// PI-3-kinase-related kinase SMG-1 pseudogene /// similar to the PI-3-kinase-related kinase SMG-1 family pseudogene 2 | LOC23117 ///<br>DKFZp547E0<br>87 ///<br>LOC348162<br>///<br>LOC440354<br>///<br>LOC613037 |
| 215554_at   | 111.1   | 48.1   | 454.1   | 2.4    | 29 | glycosylphosphatidylinositol specific phospholipase D1                                                                                                                                                        | GPLD1                                                                                     |
| 208348_s_at | 116.4   | 38     | 303.5   | 3.3    | 29 | Cas-Br-M (murine) ecotropic retroviral transforming sequence b                                                                                                                                                | CBLB                                                                                      |
| 222205_x_at | 137.1   | 109.4  | 502.2   | 5.7    | 29 | Similar to hypothetical protein FLJ38374                                                                                                                                                                      | LOC400840                                                                                 |
| 212750_at   | 930.6   | 632    | 6690.7  | 15.9   | 29 | protein phosphatase 1, regulatory (inhibitor) subunit 16B                                                                                                                                                     | PPP1R16B                                                                                  |
| 39729_at    | 1792.3  | 1477.1 | 23054   | 26.2   | 29 | peroxiredoxin 2                                                                                                                                                                                               | PRDX2                                                                                     |
| 201810_s_at | 1070.1  | 610.6  | 10902   | 33.6   | 29 | SH3-domain binding protein 5 (BTK-associated)                                                                                                                                                                 | SH3BP5                                                                                    |
| 202716_at   | 2019.7  | 1174.5 | 1578.2  | 117.1  | 29 | protein tyrosine phosphatase, non-receptor type 1                                                                                                                                                             | PTPN1                                                                                     |
| 202781_s_at | 1392.7  | 858.7  | 1351.8  | 120.4  | 29 | skeletal muscle and kidney enriched inositol phosphatase                                                                                                                                                      | SKIP                                                                                      |
| 204817_at   | 1160.2  | 785.1  | 1589.1  | 61.1   | 29 | extra spindle poles like 1 (S. cerevisiae)                                                                                                                                                                    | ESPL1                                                                                     |
| 214508_x_at | 418.7   | 356.9  | 732.4   | 21.5   | 29 | cAMP responsive element modulator                                                                                                                                                                             | CREM                                                                                      |

|             |        |        |         |       |    |                                                                                                                                                                                               |                                                  |
|-------------|--------|--------|---------|-------|----|-----------------------------------------------------------------------------------------------------------------------------------------------------------------------------------------------|--------------------------------------------------|
| 215151_at   | 278.2  | 98.2   | 400.7   | 6.6   | 29 | dedicator of cytokinesis 10                                                                                                                                                                   | DOCK10                                           |
| 221521_s_at | 1660.7 | 1195.7 | 2488.9  | 12.3  | 29 | DNA replication complex GINS protein PSF2                                                                                                                                                     | Pfs2                                             |
| 203068_at   | 278.5  | 56.5   | 1212.6  | 10.2  | 29 | kelch-like 21 (Drosophila)                                                                                                                                                                    | KLHL21                                           |
| 205590_at   | 1491.4 | 641.4  | 3396.4  | 11.1  | 29 | RAS guanyl releasing protein 1 (calcium and DAG-regulated)                                                                                                                                    | RASGRP1                                          |
| 216449_x_at | 1656.1 | 608.9  | 3772    | 27.5  | 29 | tumor rejection antigen (gp96) 1                                                                                                                                                              | TRA1                                             |
| 208068_x_at | 663.4  | 497.8  | 1784.6  | 30.3  | 29 | chorionic somatomammotropin hormone 1 (placental lactogen) /// chorionic somatomammotropin hormone 2 /// chorionic somatomammotropin hormone-like 1 /// growth hormone 1 /// growth hormone 2 | CSH1 ///<br>CSH2 ///<br>CSHL1 ///<br>GH1 /// GH2 |
| 218888_s_at | 386.1  | 148.1  | 1168.2  | 5.5   | 29 | neuropilin (NRP) and tolloid (TLL)-like 2                                                                                                                                                     | NETO2                                            |
| 221261_x_at | 492.8  | 164.3  | 1704.3  | 9.4   | 29 | melanoma antigen family D, 4 /// melanoma antigen family D, 4                                                                                                                                 | MAGED4                                           |
| 207772_s_at | 153.2  | 86.3   | 593.2   | 3.7   | 29 | HMT1 hnRNP methyltransferase-like 4 (S. cerevisiae)                                                                                                                                           | HRMT1L4                                          |
| 215931_s_at | 180.6  | 43.6   | 533.8   | 5.3   | 29 | ADP-ribosylation factor guanine nucleotide-exchange factor 2 (brefeldin A-inhibited)                                                                                                          | ARFGEF2                                          |
| 216184_s_at | 163.6  | 106.5  | 770.8   | 5.9   | 29 | regulating synaptic membrane exocytosis 1                                                                                                                                                     | RIMS1                                            |
| 201718_s_at | 523.7  | 433.5  | 1918.3  | 9.7   | 29 | erythrocyte membrane protein band 4.1-like 2                                                                                                                                                  | EPB41L2                                          |
| 220359_s_at | 546.9  | 178.5  | 15891.5 | 3.9   | 29 | cyclic AMP-regulated phosphoprotein, 21 kD                                                                                                                                                    | ARPP-21                                          |
| 201868_s_at | 147.6  | 120.5  | 611.9   | 3.7   | 29 | transducin (beta)-like 1X-linked                                                                                                                                                              | TBL1X                                            |
| 202289_s_at | 157    | 84     | 1169.5  | 5.2   | 29 | transforming, acidic coiled-coil containing protein 2                                                                                                                                         | TACC2                                            |
| 220059_at   | 777.8  | 473.2  | 9891.4  | 15.3  | 29 | BCR downstream signaling 1                                                                                                                                                                    | BRDG1                                            |
| 200704_at   | 2127.5 | 1314.5 | 3636.2  | 50.4  | 29 | lipopolysaccharide-induced TNF factor                                                                                                                                                         | LITAF                                            |
| 201396_s_at | 517.4  | 358.8  | 590.4   | 20.8  | 29 | small glutamine-rich tetratricopeptide repeat (TPR)-containing, alpha                                                                                                                         | SGTA                                             |
| 201625_s_at | 730.7  | 607.5  | 1053.5  | 75.3  | 29 | insulin induced gene 1                                                                                                                                                                        | INSIG1                                           |
| 201730_s_at | 3624.8 | 1911   | 4999.2  | 138.9 | 29 | translocated promoter region (to activated MET oncogene)                                                                                                                                      | TPR                                              |
| 207124_s_at | 422.6  | 208.9  | 510     | 13.9  | 29 | guanine nucleotide binding protein (G protein), beta 5                                                                                                                                        | GNB5                                             |
| 209052_s_at | 1267.4 | 568.8  | 2199.3  | 13.7  | 29 | Wolf-Hirschhorn syndrome candidate 1                                                                                                                                                          | WHSC1                                            |
| 212035_s_at | 759.8  | 598.6  | 1203.5  | 58.5  | 29 | exocyst complex component 7                                                                                                                                                                   | EXOC7                                            |
| 215174_at   | 249    | 135.5  | 491.3   | 8.6   | 29 | flavin containing monooxygenase 6                                                                                                                                                             | FMO6                                             |
| 217370_x_at | 1147.3 | 737    | 1707.2  | 38.8  | 29 | fusion (involved in t(12;16) in malignant liposarcoma)                                                                                                                                        | FUS                                              |
| 218812_s_at | 880.9  | 570.1  | 1354.3  | 76.4  | 29 | chromosome 7 open reading frame 19                                                                                                                                                            | C7orf19                                          |
| 219094_at   | 316.3  | 236.8  | 547.6   | 6.6   | 29 | armadillo repeat containing 8                                                                                                                                                                 | ARMC8                                            |
| 219174_at   | 142.9  | 17.2   | 203.5   | 2.2   | 29 | coiled-coil domain containing 2                                                                                                                                                               | CCDC2                                            |
| 221745_at   | 849    | 567.4  | 1216.1  | 16.3  | 29 | WD repeat domain 68                                                                                                                                                                           | WDR68                                            |
| 215234_at   | 198.1  | 112.5  | 396.3   | 7.1   | 29 | MRNA,trapped exon e1b7, DCR1-16.0,                                                                                                                                                            | ---                                              |
| 216573_at   | 204.4  | 57.2   | 559.1   | 4.7   | 29 | Clone ds1-1 immunoglobulin lambda chain VJ region, (IGL)                                                                                                                                      | ---                                              |



|             |         |        |         |        |    |                                                                                        |          |
|-------------|---------|--------|---------|--------|----|----------------------------------------------------------------------------------------|----------|
| 40837_at    | 435.6   | 331    | 1225.2  | 34.9   | 29 | transducin-like enhancer of split 2 (E(sp1) homolog, Drosophila)                       | TLE2     |
| 203857_s_at | 1302.4  | 844.3  | 3509    | 46.3   | 29 | protein disulfide isomerase family A, member 5                                         | PDIA5    |
| 211088_s_at | 230     | 164.8  | 555.7   | 7.6    | 29 | polo-like kinase 4 (Drosophila) /// polo-like kinase 4 (Drosophila)                    | PLK4     |
| 211475_s_at | 2071.5  | 1680.1 | 8077    | 413    | 29 | BCL2-associated athanogene                                                             | BAG1     |
| 217127_at   | 112.2   | 61.5   | 291.3   | 2      | 29 | cystathionase (cystathionine gamma-lyase)                                              | CTH      |
| 202286_s_at | 153.5   | 76.9   | 659.7   | 7.4    | 29 | tumor-associated calcium signal transducer 2                                           | TACSTD2  |
| 207517_at   | 131.2   | 61     | 680.2   | 4.1    | 29 | laminin, gamma 2                                                                       | LAMC2    |
| 220784_s_at | 110.7   | 31.1   | 319.1   | 1.8    | 29 | urotensin 2                                                                            | UTS2     |
| 221152_at   | 131.1   | 81.2   | 448     | 2.8    | 29 | collagen, type VIII, alpha 1                                                           | COL8A1   |
| 207894_s_at | 269.4   | 156.9  | 687.1   | 21.3   | 29 | T-cell leukemia/lymphoma 6                                                             | TCL6     |
| 201942_s_at | 133.4   | 82.9   | 588.8   | 4.7    | 29 | carboxypeptidase D                                                                     | CPD      |
| 206935_at   | 54.9    | 18.9   | 294.4   | 0.8    | 29 | protocadherin 8                                                                        | PCDH8    |
| 211341_at   | 1031    | 133.9  | 10201.6 | 2.1    | 29 | POU domain, class 4, transcription factor 1                                            | POU4F1   |
| 201598_s_at | 1332.6  | 1111.7 | 2082.9  | 189.5  | 28 | inositol polyphosphate phosphatase-like 1                                              | INPPL1   |
| 202769_at   | 2932.9  | 1532.5 | 3398    | 190.4  | 28 | Cyclin G2                                                                              | CCNG2    |
| 202900_s_at | 1820.3  | 1430.3 | 2398.2  | 109.6  | 28 | nucleoporin 88kDa                                                                      | NUP88    |
| 203113_s_at | 12072.1 | 8841.5 | 11404.7 | 1180.8 | 28 | eukaryotic translation elongation factor 1 delta (guanine nucleotide exchange protein) | EEF1D    |
| 207499_x_at | 922.1   | 720.5  | 1197.2  | 51.5   | 28 | smooth muscle cell associated protein-1                                                | SMAP-1   |
| 209535_s_at | 889.7   | 507.2  | 808.6   | 65.3   | 28 | ---                                                                                    | ---      |
| 211352_s_at | 940.2   | 324.4  | 918.2   | 9.3    | 28 | nuclear receptor coactivator 3                                                         | NCOA3    |
| 213286_at   | 422.7   | 215.1  | 583.7   | 12.7   | 28 | zinc finger RNA binding protein                                                        | ZFR      |
| 214052_x_at | 476.4   | 225.6  | 618.2   | 6.3    | 28 | BAT2 domain containing 1                                                               | BAT2D1   |
| 214336_s_at | 1446.5  | 518.3  | 1121.1  | 62.6   | 28 | coatamer protein complex, subunit alpha                                                | COPA     |
| 215509_s_at | 771.4   | 220.1  | 1118.4  | 11     | 28 | BUB1 budding uninhibited by benzimidazoles 1 homolog (yeast)                           | BUB1     |
| 217966_s_at | 290.5   | 157.6  | 489.7   | 7.8    | 28 | chromosome 1 open reading frame 24                                                     | C1orf24  |
| 219207_at   | 373.8   | 241.9  | 568.8   | 6.8    | 28 | hypothetical protein FLJ21128                                                          | FLJ21128 |
| 221611_s_at | 254.3   | 148.8  | 390.6   | 11.1   | 28 | PHD finger protein 7                                                                   | PHF7     |
| 211274_at   | 165.9   | 85.1   | 342.9   | 8.3    | 28 | T-box 1                                                                                | TBX1     |
| 208023_at   | 181.6   | 76.3   | 382.3   | 5.6    | 28 | tumor necrosis factor receptor superfamily, member 4                                   | TNFRSF4  |
| 216872_at   | 120     | 52.7   | 514.8   | 1.8    | 28 | Hr44 antigen                                                                           | HR44     |
| 203836_s_at | 444.9   | 329.7  | 1706    | 6.6    | 28 | mitogen-activated protein kinase kinase kinase 5                                       | MAP3K5   |
| 214651_s_at | 115.1   | 59.9   | 7233.4  | 3      | 28 | homeo box A9                                                                           | HOXA9    |
| 201843_s_at | 109.6   | 78.2   | 7630.9  | 4.4    | 28 | EGF-containing fibulin-like extracellular matrix protein 1                             | EFEMP1   |
| 203241_at   | 1066.4  | 834.5  | 1885.9  | 152.9  | 28 | UV radiation resistance associated gene                                                | UVRAG    |

|             |        |        |        |       |    |                                                                                                                                               |          |
|-------------|--------|--------|--------|-------|----|-----------------------------------------------------------------------------------------------------------------------------------------------|----------|
| 204970_s_at | 749.8  | 468.4  | 1127.1 | 41.9  | 28 | v-maf musculoaponeurotic fibrosarcoma oncogene homolog G (avian)                                                                              | MAFG     |
| 214941_s_at | 2325.5 | 1206.9 | 2919.2 | 73.8  | 28 | formin binding protein 3                                                                                                                      | FNBP3    |
| 216279_at   | 188.3  | 103.8  | 303    | 5.3   | 28 | zinc finger protein 272                                                                                                                       | ZNF272   |
| 218810_at   | 797.5  | 275.2  | 968.6  | 25.1  | 28 | zinc finger CCCH-type containing 12A                                                                                                          | ZC3H12A  |
| 219717_at   | 769.6  | 568.7  | 1382.9 | 72.7  | 28 | hypothetical protein FLJ20280                                                                                                                 | FLJ20280 |
| 221664_s_at | 763.3  | 449.2  | 1121.6 | 24.1  | 28 | F11 receptor                                                                                                                                  | F11R     |
| 221154_at   | 188.5  | 47.7   | 392.8  | 1.3   | 28 | tripartite motif-containing 49                                                                                                                | TRIM49   |
| 222320_at   | 188.7  | 62.2   | 779    | 0.4   | 28 | Cell division cycle 73, Paf1/RNA polymerase II complex component, homolog (S. cerevisiae)                                                     | CDC73    |
| 203876_s_at | 221.3  | 182.3  | 484.9  | 18.2  | 28 | matrix metalloproteinase 11 (stromelysin 3)                                                                                                   | MMP11    |
| 214295_at   | 178.6  | 121.5  | 991    | 6.2   | 28 | KIAA0485 protein                                                                                                                              | KIAA0485 |
| 202859_x_at | 705.3  | 181.2  | 4322.1 | 10.9  | 28 | interleukin 8                                                                                                                                 | IL8      |
| 212336_at   | 118.4  | 40.8   | 347.3  | 3.1   | 28 | erythrocyte membrane protein band 4.1-like 1                                                                                                  | EPB41L1  |
| 218834_s_at | 183.7  | 97.4   | 471.7  | 10.5  | 28 | heat shock 70kDa protein 5 (glucose-regulated protein, 78kDa) binding protein 1                                                               | HSPA5BP1 |
| 205612_at   | 119.4  | 66.5   | 613.8  | 1.8   | 28 | multimerin 1                                                                                                                                  | MMRN1    |
| 213400_s_at | 404    | 207.8  | 1760.6 | 11.7  | 28 | transducin (beta)-like 1X-linked                                                                                                              | TBL1X    |
| 208983_s_at | 634.7  | 438    | 5148   | 13.9  | 28 | platelet/endothelial cell adhesion molecule (CD31 antigen)                                                                                    | PECAM1   |
| 201309_x_at | 2136.9 | 1690.7 | 3920.1 | 205.2 | 27 | chromosome 5 open reading frame 13                                                                                                            | C5orf13  |
| 202154_x_at | 3521.2 | 1931.5 | 5268.2 | 196.6 | 27 | tubulin, beta 3                                                                                                                               | TUBB3    |
| 203318_s_at | 1287.8 | 861.9  | 2184.2 | 162.8 | 27 | zinc finger protein 148 (pHZ-52)                                                                                                              | ZNF148   |
| 207556_s_at | 1040.9 | 730.5  | 1867.1 | 30.2  | 27 | diacylglycerol kinase, zeta 104kDa                                                                                                            | DGKZ     |
| 209610_s_at | 1038.3 | 584.6  | 1530.4 | 53.6  | 27 | solute carrier family 1 (glutamate/neutral amino acid transporter), member 4                                                                  | SLC1A4   |
| 210605_s_at | 357.4  | 171.9  | 630.5  | 12.2  | 27 | milk fat globule-EGF factor 8 protein                                                                                                         | MFGE8    |
| 213182_x_at | 210.3  | 28.2   | 399    | 4.5   | 27 | cyclin-dependent kinase inhibitor 1C (p57, Kip2)                                                                                              | CDKN1C   |
| 216983_s_at | 314.4  | 198.1  | 530.3  | 12.5  | 27 | zinc finger protein 224                                                                                                                       | ZNF224   |
| 217924_at   | 374.4  | 211    | 591.3  | 11.3  | 27 | chromosome 6 open reading frame 106                                                                                                           | C6orf106 |
| 218219_s_at | 826.9  | 399    | 920.1  | 13.4  | 27 | LanC lantibiotic synthetase component C-like 2 (bacterial)                                                                                    | LANCL2   |
| 218981_at   | 146.5  | 90.6   | 269.5  | 1.2   | 27 | ACN9 homolog (S. cerevisiae)                                                                                                                  | ACN9     |
| 219339_s_at | 483.5  | 242.8  | 515.2  | 9.8   | 27 | euchromatic histone-lysine N-methyltransferase 1                                                                                              | EHMT1    |
| 221262_s_at | 209.5  | 80.6   | 360.8  | 5     | 27 | solute carrier family 2 (facilitated glucose transporter), member 11 /// solute carrier family 2 (facilitated glucose transporter), member 11 | SLC2A11  |
| 221546_at   | 307.2  | 156.8  | 524.4  | 10.8  | 27 | PRP18 pre-mRNA processing factor 18 homolog (yeast)                                                                                           | PRPF18   |
| 35436_at    | 470.9  | 214.4  | 673.4  | 19.5  | 27 | golgi autoantigen, golgin subfamily a, 2                                                                                                      | GOLGA2   |

|             |         |         |         |        |    |                                                                                                  |         |
|-------------|---------|---------|---------|--------|----|--------------------------------------------------------------------------------------------------|---------|
| 208851_s_at | 350.1   | 209.5   | 747.3   | 15.8   | 27 | Thy-1 cell surface antigen                                                                       | THY1    |
| 209201_x_at | 27920.9 | 22826.8 | 56196.9 | 1417.6 | 27 | chemokine (C-X-C motif) receptor 4                                                               | CXCR4   |
| 221829_s_at | 2947.8  | 1924.8  | 7554.1  | 350.5  | 27 | transportin 1                                                                                    | TNPO1   |
| 222063_s_at | 151     | 55.8    | 320.1   | 2.5    | 27 | CDP-diacylglycerol synthase (phosphatidate cytidyltransferase) 1                                 | CDS1    |
| 216108_at   | 117.4   | 38.8    | 248.7   | 4.4    | 27 | Transcribed locus, weakly similar to NP_055301.1 neuronal thread protein AD7c-NTP [Homo sapiens] | ---     |
| 217585_at   | 133.6   | 76.5    | 392.2   | 4.7    | 27 | nebullette                                                                                       | NEBL    |
| 211771_s_at | 231.6   | 49.6    | 938.8   | 6.4    | 27 | POU domain, class 2, transcription factor 2 /// POU domain, class 2, transcription factor 2      | POU2F2  |
| 215609_at   | 160.3   | 126.1   | 450.3   | 6.3    | 27 | START domain containing 7                                                                        | STARD7  |
| 202953_at   | 104.2   | 88      | 968.1   | 9.6    | 27 | complement component 1, q subcomponent, beta polypeptide                                         | C1QB    |
| 201710_at   | 2306.4  | 789.5   | 2974.5  | 27.5   | 27 | v-myb myeloblastosis viral oncogene homolog (avian)-like 2                                       | MYBL2   |
| 203377_s_at | 1193.9  | 412.3   | 871.2   | 27.2   | 27 | cell division cycle 40 homolog (yeast)                                                           | CDC40   |
| 212085_at   | 16661.8 | 13263.8 | 21255.3 | 1445.2 | 27 | solute carrier family 25 (mitochondrial carrier; adenine nucleotide translocator), member 6      | SLC25A6 |
| 217094_s_at | 478.9   | 218.5   | 431.3   | 12.8   | 27 | itchy homolog E3 ubiquitin protein ligase (mouse)                                                | ITCH    |
| 218418_s_at | 3248.2  | 1177.9  | 4104.1  | 69.6   | 27 | ankyrin repeat domain 25                                                                         | ANKRD25 |
| 202545_at   | 554     | 284.5   | 2142.8  | 20.2   | 27 | protein kinase C, delta                                                                          | PRKCD   |
| 203263_s_at | 351.6   | 271.3   | 737     | 8.3    | 27 | Cdc42 guanine nucleotide exchange factor (GEF) 9                                                 | ARHGEF9 |
| 203653_s_at | 408.8   | 335.3   | 883.7   | 8.1    | 27 | coilin                                                                                           | COIL    |
| 206850_at   | 540.4   | 204.2   | 1160.3  | 16.3   | 27 | RAS-related on chromosome 22                                                                     | RRP22   |
| 207526_s_at | 205     | 117.9   | 519.5   | 4.7    | 27 | interleukin 1 receptor-like 1                                                                    | IL1RL1  |
| 215203_at   | 847.9   | 423.2   | 2505.9  | 52     | 27 | golgi autoantigen, golgin subfamily a, 4                                                         | GOLGA4  |
| 217607_x_at | 225     | 134.6   | 475.7   | 2      | 27 | eukaryotic translation initiation factor 4 gamma, 2                                              | EIF4G2  |
| 220140_s_at | 442.2   | 264.5   | 1143.6  | 19.5   | 27 | sorting nexin 11                                                                                 | SNX11   |
| 220296_at   | 283.9   | 169.2   | 806     | 13.1   | 27 | UDP-N-acetyl-alpha-D-galactosamine:polypeptide N-acetylgalactosaminyltransferase 10 (GalNAc-T10) | GALNT10 |
| 205547_s_at | 358.7   | 262.2   | 1771    | 11.8   | 27 | transgelin                                                                                       | TAGLN   |
| 207479_at   | 130.3   | 26.9    | 503.6   | 1.7    | 27 | ---                                                                                              | ---     |
| 211538_s_at | 335.4   | 178.3   | 6151.6  | 10.9   | 27 | heat shock 70kDa protein 2                                                                       | HSPA2   |
| 217302_at   | 201.1   | 124.7   | 577.8   | 8.8    | 27 | olfactory receptor, family 2, subfamily F, member 2                                              | OR2F2   |
| 220550_at   | 126.2   | 51.7    | 542.1   | 2.6    | 27 | F-box protein 4                                                                                  | FBXO4   |
| 207357_s_at | 235     | 109.4   | 1081.7  | 9.9    | 27 | UDP-N-acetyl-alpha-D-galactosamine:polypeptide N-acetylgalactosaminyltransferase 10 (GalNAc-T10) | GALNT10 |
| 212392_s_at | 203.4   | 152.7   | 545     | 11.9   | 27 | phosphodiesterase 4D interacting protein (myomegalin)                                            | PDE4DIP |
| 213606_s_at | 198.8   | 76.2    | 989.3   | 1.2    | 27 | Rho GDP dissociation inhibitor (GDI) alpha                                                       | ARHGDI  |

|             |         |        |         |       |    |                                                                                                                 |           |
|-------------|---------|--------|---------|-------|----|-----------------------------------------------------------------------------------------------------------------|-----------|
| 202040_s_at | 1505.6  | 1348.4 | 2800    | 323.2 | 27 | Jumonji, AT rich interactive domain 1A (RBBP2-like)                                                             | JARID1A   |
| 202588_at   | 475.2   | 260    | 665.6   | 33.5  | 27 | adenylate kinase 1                                                                                              | AK1       |
| 203272_s_at | 767.6   | 394.4  | 820.6   | 38.4  | 27 | tumor suppressor candidate 2                                                                                    | TUSC2     |
| 203869_at   | 227.4   | 154.5  | 412.2   | 7.5   | 27 | ubiquitin specific peptidase 46                                                                                 | USP46     |
| 205315_s_at | 583.5   | 457.3  | 879.7   | 21.4  | 27 | syntrophin, beta 2 (dystrophin-associated protein A1, 59kDa, basic component 2)                                 | SNTB2     |
| 208503_s_at | 955.4   | 562.3  | 1110.6  | 62.7  | 27 | GATA zinc finger domain containing 1                                                                            | GATAD1    |
| 208506_at   | 187.1   | 113.7  | 296.6   | 3.6   | 27 | histone 1, H3f                                                                                                  | HIST1H3F  |
| 208859_s_at | 717.8   | 264.6  | 975.1   | 8.1   | 27 | alpha thalassemia/mental retardation syndrome X-linked (RAD54 homolog, S. cerevisiae)                           | ATRX      |
| 208879_x_at | 523     | 396.2  | 924.3   | 10.8  | 27 | chromosome 20 open reading frame 14                                                                             | C20orf14  |
| 212794_s_at | 6236.8  | 2719.2 | 8965.8  | 303   | 27 | KIAA1033                                                                                                        | KIAA1033  |
| 213223_at   | 1355.5  | 995.3  | 1388.3  | 48.2  | 27 | ribosomal protein L28                                                                                           | RPL28     |
| 213879_at   | 680.6   | 451.6  | 1000.1  | 31.2  | 27 | SMT3 suppressor of mif two 3 homolog 2 (yeast)                                                                  | SUMO2     |
| 215001_s_at | 6297.3  | 4027   | 11499.9 | 107.4 | 27 | glutamate-ammonia ligase (glutamine synthetase)                                                                 | GLUL      |
| 217208_s_at | 515.6   | 370    | 839.4   | 18.8  | 27 | discs, large homolog 1 (Drosophila)                                                                             | DLG1      |
| 217480_x_at | 3170.5  | 1483.4 | 3437.3  | 282.6 | 27 | similar to Ig kappa chain                                                                                       | LOC339562 |
| 217813_s_at | 845.4   | 613.1  | 1204.4  | 48.6  | 27 | spindlin                                                                                                        | SPIN      |
| 219148_at   | 688.6   | 300.2  | 1139.4  | 16.5  | 27 | PDZ binding kinase                                                                                              | PBK       |
| 220068_at   | 11799.9 | 7578.4 | 22254.1 | 78.9  | 27 | pre-B lymphocyte gene 3                                                                                         | VPREB3    |
| 221051_s_at | 249.1   | 122    | 462.4   | 4.6   | 27 | integrin beta 1 binding protein 3                                                                               | ITGB1BP3  |
| 222165_x_at | 844.1   | 506    | 1300    | 14.9  | 27 | chromosome 9 open reading frame 16                                                                              | C9orf16   |
| 213751_at   | 255.7   | 70.7   | 596.5   | 5.5   | 27 | hypothetical protein LOC284352                                                                                  | LOC284352 |
| 218012_at   | 2264.7  | 844.4  | 8541.7  | 53    | 27 | TSPY-like 2                                                                                                     | TSPYL2    |
| 219264_s_at | 432     | 188.2  | 1178.5  | 5.9   | 27 | protein phosphatase 2 (formerly 2A), regulatory subunit B", beta                                                | PPP2R3B   |
| 219994_at   | 886.4   | 477.3  | 2329.5  | 31    | 27 | amyloid beta (A4) precursor protein-binding, family B, member 1 interacting protein                             | APBB1IP   |
| 206142_at   | 224.2   | 87     | 536.9   | 2.2   | 27 | zinc finger protein 135 (clone pHZ-17)                                                                          | ZNF135    |
| 217332_at   | 166     | 71.5   | 865.4   | 3.5   | 27 | Hypothetical LOC387937                                                                                          | LOC387937 |
| 211751_at   | 89.3    | 37.7   | 420.3   | 2.9   | 27 | phosphodiesterase 4D interacting protein (myomegalin) /// phosphodiesterase 4D interacting protein (myomegalin) | PDE4DIP   |
| 201204_s_at | 331.7   | 173.1  | 1773.8  | 14    | 27 | CDNA FLJ41000 fis, clone UTERU2016761, highly similar to Homo sapiens ES/130 mRNA                               | ---       |
| 204792_s_at | 112     | 62.2   | 323.3   | 4.1   | 27 | WD and tetratricopeptide repeats 2                                                                              | WDTC2     |
| 211463_at   | 123.6   | 54.9   | 349.5   | 4     | 27 | Zic family member 4                                                                                             | ZIC4      |
| 208690_s_at | 6571.5  | 4976.5 | 24492   | 198.6 | 27 | PDZ and LIM domain 1 (elfin)                                                                                    | PDLIM1    |

|             |         |        |         |       |    |                                                                                                                                                                                               |                |
|-------------|---------|--------|---------|-------|----|-----------------------------------------------------------------------------------------------------------------------------------------------------------------------------------------------|----------------|
| 221037_s_at | 61.6    | 35.4   | 551.3   | 0.5   | 27 | solute carrier family 25 (mitochondrial carrier; adenine nucleotide translocator), member 31 /// solute carrier family 25 (mitochondrial carrier; adenine nucleotide translocator), member 31 | SLC25A31       |
| 206686_at   | 178     | 98.2   | 624.3   | 13.7  | 27 | pyruvate dehydrogenase kinase, isoenzyme 1                                                                                                                                                    | PDK1           |
| 201161_s_at | 15493.5 | 6381.9 | 21619.5 | 36.5  | 26 | cold shock domain protein A                                                                                                                                                                   | CSDA           |
| 203832_at   | 3801    | 1803.9 | 4672    | 216.6 | 26 | enolase 1, (alpha) /// small nuclear ribonucleoprotein polypeptide F                                                                                                                          | ENO1 /// SNRPF |
| 208919_s_at | 2456.4  | 1631.2 | 2454.9  | 404.3 | 26 | NAD kinase                                                                                                                                                                                    | NADK           |
| 209308_s_at | 1454.5  | 1070.9 | 1764.3  | 94.4  | 26 | BCL2/adenovirus E1B 19kDa interacting protein 2                                                                                                                                               | BNIP2          |
| 209336_at   | 509.8   | 276    | 745.3   | 15.7  | 26 | PWP2 periodic tryptophan protein homolog (yeast)                                                                                                                                              | PWP2H          |
| 211085_s_at | 605.3   | 105.9  | 474.3   | 3.6   | 26 | serine/threonine kinase 4 /// serine/threonine kinase 4                                                                                                                                       | STK4           |
| 212078_s_at | 932.1   | 633.4  | 1296.9  | 54.9  | 26 | myeloid/lymphoid or mixed-lineage leukemia (trithorax homolog, Drosophila)                                                                                                                    | MLL            |
| 218906_x_at | 513.8   | 291.8  | 771.3   | 24.2  | 26 | kinesin light chain 2                                                                                                                                                                         | KLC2           |
| 219833_s_at | 519.5   | 357.9  | 862.3   | 8.4   | 26 | EF-hand domain (C-terminal) containing 1                                                                                                                                                      | EFHC1          |
| 90610_at    | 3305.2  | 2444.1 | 2899    | 500.2 | 26 | leucine-rich repeats and calponin homology (CH) domain containing 4                                                                                                                           | LRCH4          |
| 204180_s_at | 596.7   | 442.4  | 1360.7  | 53.5  | 26 | zinc finger protein 297B                                                                                                                                                                      | ZNF297B        |
| 219213_at   | 336.6   | 193.6  | 1089.7  | 15.2  | 26 | junctional adhesion molecule 2                                                                                                                                                                | JAM2           |
| 205106_at   | 185     | 127.5  | 477.4   | 17.3  | 26 | mature T-cell proliferation 1                                                                                                                                                                 | MTCP1          |
| 215669_at   | 218.9   | 124.5  | 1632.2  | 7.2   | 26 | major histocompatibility complex, class II, DR beta 4                                                                                                                                         | HLA-DRB4       |
| 208511_at   | 264.1   | 220    | 656.1   | 11.5  | 26 | pituitary tumor-transforming 3                                                                                                                                                                | PTTG3          |
| 213906_at   | 210.5   | 99.7   | 700.2   | 5.6   | 26 | v-myb myeloblastosis viral oncogene homolog (avian)-like 1                                                                                                                                    | MYBL1          |
| 216070_at   | 96      | 60.7   | 453     | 1.9   | 26 | ATPase, Na <sup>+</sup> /K <sup>+</sup> transporting, beta 1 polypeptide                                                                                                                      | ATP1B1         |
| 221674_s_at | 165.4   | 84.5   | 539.1   | 11.1  | 26 | chordin                                                                                                                                                                                       | CHRD           |
| 215901_at   | 117.6   | 99     | 461     | 3.6   | 26 | zinc finger protein 81 (HFZ20)                                                                                                                                                                | ZNF81          |
| 217085_at   | 70.6    | 36.4   | 382.5   | 2.3   | 26 | Solute carrier family 14 (urea transporter), member 2                                                                                                                                         | SLC14A2        |
| 205376_at   | 93.9    | 65.4   | 516.9   | 2.1   | 26 | inositol polyphosphate-4-phosphatase, type II, 105kDa                                                                                                                                         | INPP4B         |
| 208096_s_at | 76.5    | 45.3   | 480.1   | 3.1   | 26 | collagen, type XXI, alpha 1 /// collagen, type XXI, alpha 1                                                                                                                                   | COL21A1        |
| 205933_at   | 434.8   | 329.6  | 2712.4  | 9.5   | 26 | SET binding protein 1                                                                                                                                                                         | SETBP1         |
| 204446_s_at | 2632.3  | 1297.5 | 12918.8 | 3.8   | 26 | arachidonate 5-lipoxygenase                                                                                                                                                                   | ALOX5          |
| 201518_at   | 1663.8  | 1366.3 | 2814.1  | 80.4  | 26 | chromobox homolog 1 (HP1 beta homolog Drosophila )                                                                                                                                            | CBX1           |
| 202407_s_at | 689.2   | 443.7  | 649.4   | 8.1   | 26 | PRP31 pre-mRNA processing factor 31 homolog (yeast)                                                                                                                                           | PRPF31         |
| 202937_x_at | 632.3   | 314    | 1072.3  | 19.1  | 26 | CGI-96 protein                                                                                                                                                                                | CGI-96         |

|             |        |        |         |       |    |                                                                                   |           |
|-------------|--------|--------|---------|-------|----|-----------------------------------------------------------------------------------|-----------|
| 203362_s_at | 1114.5 | 849.3  | 2198.2  | 97    | 26 | MAD2 mitotic arrest deficient-like 1 (yeast)                                      | MAD2L1    |
| 208750_s_at | 2763.3 | 1990.4 | 4772.1  | 326.7 | 26 | ADP-ribosylation factor 1                                                         | ARF1      |
| 210458_s_at | 140.3  | 64.3   | 256.2   | 1.9   | 26 | TRAF family member-associated NFKB activator                                      | TANK      |
| 210633_x_at | 3072.4 | 2422   | 4202.8  | 624.1 | 26 | keratin 10 (epidermolytic hyperkeratosis; keratosis palmaris et plantaris)        | KRT10     |
| 211804_s_at | 761.5  | 573.6  | 1161.4  | 27.6  | 26 | cyclin-dependent kinase 2                                                         | CDK2      |
| 213548_s_at | 604.8  | 443    | 972.2   | 22.9  | 26 | hypothetical protein H41                                                          | H41       |
| 217157_x_at | 1340.3 | 507.1  | 1638.1  | 29.4  | 26 | IGK mRNA for immunoglobulin kappa light chain VLJ region, partial cds, clone:K142 | ---       |
| 219131_at   | 276.1  | 193.2  | 503.7   | 22.3  | 26 | UbiA prenyltransferase domain containing 1                                        | UBIAD1    |
| 219366_at   | 442.9  | 229.7  | 607.7   | 18.4  | 26 | apoptosis, caspase activation inhibitor                                           | AVEN      |
| 219807_x_at | 1785.1 | 1074.6 | 1756    | 54.9  | 26 | RAB4B, member RAS oncogene family                                                 | RAB4B     |
| 221734_at   | 583.9  | 329.7  | 1064.7  | 32.7  | 26 | hypothetical protein MGC12103                                                     | LOC133619 |
| 222082_at   | 382.4  | 342.7  | 743.2   | 13    | 26 | zinc finger and BTB domain containing 7A                                          | ZBTB7A    |
| 41386_i_at  | 2681.1 | 1537.2 | 3237.1  | 299.7 | 26 | ---                                                                               | ---       |
| 203753_at   | 5156.3 | 3589.5 | 11739.6 | 100.6 | 26 | transcription factor 4                                                            | TCF4      |
| 206530_at   | 440.9  | 314.6  | 1126.1  | 26.8  | 26 | RAB30, member RAS oncogene family                                                 | RAB30     |
| 211514_at   | 184.3  | 57.5   | 481.6   | 6.7   | 26 | receptor interacting protein kinase 5                                             | RIPK5     |
| 216894_x_at | 256    | 28.2   | 537.5   | 3.6   | 26 | cyclin-dependent kinase inhibitor 1C (p57, Kip2)                                  | CDKN1C    |
| 220898_at   | 253.3  | 172.7  | 581.6   | 6.1   | 26 | ---                                                                               | ---       |
| 46142_at    | 786.4  | 434.8  | 1628.2  | 19.2  | 26 | hypothetical protein FLJ12681                                                     | FLJ12681  |
| 214443_at   | 248.3  | 149.3  | 1045.7  | 9.7   | 26 | poliovirus receptor                                                               | PVR       |
| 220702_at   | 484.2  | 331.2  | 1135.3  | 11.6  | 26 | ---                                                                               | ---       |
| 208180_s_at | 481.3  | 295.3  | 1335.4  | 3.3   | 26 | histone 1, H4h                                                                    | HIST1H4H  |
| 207228_at   | 160.2  | 88     | 418.2   | 10.3  | 26 | protein kinase, cAMP-dependent, catalytic, gamma                                  | PRKACG    |
| 204257_at   | 1371.7 | 1160.5 | 6143    | 100.4 | 26 | fatty acid desaturase 3                                                           | FADS3     |
| 205420_at   | 90.8   | 54.9   | 421.3   | 2.7   | 26 | peroxisomal biogenesis factor 7                                                   | PEX7      |
| 213582_at   | 106.3  | 74.3   | 395.4   | 1.6   | 26 | ATPase, Class VI, type 11A                                                        | ATP11A    |
| 213222_at   | 324.3  | 226.9  | 1351.7  | 3.6   | 26 | phospholipase C, beta 1 (phosphoinositide-specific)                               | PLCB1     |
| 220893_at   | 128.5  | 44.9   | 548.2   | 4.2   | 26 | uncharacterized gastric protein ZA52P                                             | LOC57399  |
| 210848_at   | 153.2  | 122.9  | 459.4   | 5.4   | 26 | ---                                                                               | ---       |
| 214649_s_at | 130.4  | 97.7   | 420     | 3.5   | 26 | myotubularin related protein 2                                                    | MTMR2     |
| 209825_s_at | 519.7  | 444.7  | 1963.8  | 8     | 26 | uridine-cytidine kinase 2                                                         | UCK2      |
| 200914_x_at | 913.4  | 714.2  | 983.4   | 106.9 | 26 | kinectin 1 (kinesin receptor)                                                     | KTN1      |
| 203787_at   | 3369.3 | 2320.4 | 4268    | 120.7 | 26 | single-stranded DNA binding protein 2                                             | SSBP2     |
| 205932_s_at | 529.7  | 159.8  | 978.8   | 11.1  | 26 | msh homeo box homolog 1 (Drosophila)                                              | MSX1      |
| 207700_s_at | 2273.6 | 996.8  | 1781    | 167.3 | 26 | nuclear receptor coactivator 3                                                    | NCOA3     |
| 210461_s_at | 570.6  | 262.9  | 974.7   | 43.7  | 26 | actin binding LIM protein 1                                                       | ABLIM1    |
| 213186_at   | 473.6  | 342.9  | 532     | 9.9   | 26 | zinc finger DAZ interacting protein 3                                             | DZIP3     |
| 214738_s_at | 607.5  | 372.4  | 1062    | 13.5  | 26 | NIMA (never in mitosis gene a)- related kinase 9                                  | NEK9      |

|             |        |        |         |        |    |                                                                                             |                                 |
|-------------|--------|--------|---------|--------|----|---------------------------------------------------------------------------------------------|---------------------------------|
| 218774_at   | 539.9  | 338.8  | 850.7   | 24.2   | 26 | decapping enzyme, scavenger                                                                 | DCPS                            |
| 218908_at   | 525.1  | 270.4  | 786.4   | 17.6   | 26 | alveolar soft part sarcoma chromosome region, candidate 1                                   | ASPSCR1                         |
| 211386_at   | 286.8  | 178.2  | 604.1   | 5      | 26 | hypothetical protein MGC12488                                                               | MGC12488                        |
| 211177_s_at | 344.7  | 152.3  | 781.9   | 16.1   | 26 | thioredoxin reductase 2                                                                     | TXNRD2                          |
| 215117_at   | 661.4  | 193.7  | 1613.1  | 2.8    | 26 | recombination activating gene 2                                                             | RAG2                            |
| 206166_s_at | 157.6  | 100.6  | 383.3   | 8.1    | 26 | chloride channel, calcium activated, family member 2                                        | CLCA2                           |
| 211620_x_at | 292.2  | 158.1  | 710.2   | 5.8    | 26 | runt-related transcription factor 1 (acute myeloid leukemia 1; aml1 oncogene)               | RUNX1                           |
| 214828_s_at | 268.6  | 174.9  | 680.9   | 10.9   | 26 | similar to CGI-96                                                                           | dJ222E13.2                      |
| 209125_at   | 133.6  | 97.9   | 826.3   | 5.4    | 26 | keratin 6A /// keratin 6C /// keratin 6E                                                    | KRT6A ///<br>KRT6C ///<br>KRT6E |
| 219666_at   | 924.1  | 459.5  | 7946.9  | 14.9   | 26 | membrane-spanning 4-domains, subfamily A, member 6A                                         | MS4A6A                          |
| 35974_at    | 3454.6 | 2149.4 | 18984.7 | 227.5  | 26 | lymphoid-restricted membrane protein                                                        | LRMP                            |
| 208015_at   | 324.6  | 243.5  | 3779.8  | 5      | 26 | SMAD, mothers against DPP homolog 1 (Drosophila)                                            | SMAD1                           |
| 202718_at   | 113.1  | 58.5   | 4105.7  | 4.9    | 26 | insulin-like growth factor binding protein 2, 36kDa                                         | IGFBP2                          |
| 203401_at   | 837    | 652.7  | 1491.4  | 29.4   | 25 | phosphoribosyl pyrophosphate synthetase 2                                                   | PRPS2                           |
| 203907_s_at | 2033.9 | 1446.6 | 3024.1  | 138    | 25 | IQ motif and Sec7 domain 1                                                                  | IQSEC1                          |
| 205017_s_at | 339.5  | 185.8  | 617.6   | 12.6   | 25 | muscleblind-like 2 (Drosophila)                                                             | MBNL2                           |
| 208248_x_at | 3004.5 | 1846.7 | 5417.3  | 311.7  | 25 | amyloid beta (A4) precursor-like protein 2                                                  | APLP2                           |
| 213007_at   | 1438.7 | 874.5  | 1714.6  | 104.6  | 25 | hypothetical protein FLJ10719                                                               | FLJ10719                        |
| 216187_x_at | 9608.3 | 6081   | 10136.8 | 1384.5 | 25 | Kinesin 2                                                                                   | KNS2                            |
| 218308_at   | 2167.3 | 1016.3 | 2296.8  | 32.3   | 25 | transforming, acidic coiled-coil containing protein 3                                       | TACC3                           |
| 219203_at   | 407.8  | 60.7   | 564.5   | 13.9   | 25 | chromosome 14 open reading frame 122                                                        | C14orf122                       |
| 222027_at   | 535.7  | 147    | 680     | 13.7   | 25 | Nuclear casein kinase and cyclin-dependent kinase substrate 1                               | NUCKS1                          |
| 206408_at   | 211    | 62.4   | 454.5   | 6.6    | 25 | leucine rich repeat transmembrane neuronal 2                                                | LRRTM2                          |
| 213623_at   | 330.1  | 213.7  | 833     | 8.8    | 25 | kinesin family member 3A                                                                    | KIF3A                           |
| 215459_at   | 317    | 169.2  | 668     | 7.5    | 25 | Tax1 (human T-cell leukemia virus type I) binding protein 3                                 | TAX1BP3                         |
| 206079_at   | 343.8  | 180.7  | 938.1   | 11.4   | 25 | choroideremia-like (Rab escort protein 2)                                                   | CHML                            |
| 208465_at   | 135.9  | 43.4   | 1907.9  | 7.2    | 25 | glutamate receptor, metabotropic 2                                                          | GRM2                            |
| 61732_r_at  | 83.1   | 23.6   | 198.2   | 0.3    | 25 | coiled-coil domain containing 2                                                             | CCDC2                           |
| 64900_at    | 95.8   | 29.2   | 263.9   | 3      | 25 | carbohydrate (N-acetylglucosamine 6-O) sulfotransferase 5 /// hypothetical protein MGC15429 | CHST5 ///<br>MGC15429           |
| 215653_at   | 66.6   | 14.5   | 411.1   | 0.3    | 25 | Glypican 5                                                                                  | GPC5                            |
| 208054_at   | 83.6   | 43.8   | 792.6   | 2.8    | 25 | hect domain and RLD 4                                                                       | HERC4                           |
| 219948_x_at | 55.7   | 18.7   | 366     | 1      | 25 | UDP glucuronosyltransferase 2 family, polypeptide A3                                        | UGT2A3                          |

|             |        |        |         |       |    |                                                                                                                                         |           |
|-------------|--------|--------|---------|-------|----|-----------------------------------------------------------------------------------------------------------------------------------------|-----------|
| 208394_x_at | 81.2   | 54.2   | 1063.4  | 2.3   | 25 | endothelial cell-specific molecule 1                                                                                                    | ESM1      |
| 207555_s_at | 356.3  | 210.5  | 600.8   | 14.6  | 25 | thromboxane A2 receptor                                                                                                                 | TBXA2R    |
| 208319_s_at | 2462.3 | 1579.7 | 4284.6  | 231.2 | 25 | RNA binding motif (RNP1, RRM) protein 3                                                                                                 | RBM3      |
| 208415_x_at | 2728.8 | 1776.8 | 2291.1  | 315.2 | 25 | inhibitor of growth family, member 1                                                                                                    | ING1      |
| 209878_s_at | 832.2  | 497.4  | 1166.4  | 19.8  | 25 | v-rel reticuloendotheliosis viral oncogene homolog A, nuclear factor of kappa light polypeptide gene enhancer in B-cells 3, p65 (avian) | RELA      |
| 212475_at   | 260.3  | 199.7  | 517.2   | 18.7  | 25 | KIAA0241 protein                                                                                                                        | KIAA0241  |
| 212867_at   | 1495.5 | 1330.8 | 1768.6  | 356.9 | 25 | Nuclear receptor coactivator 2 /// Nuclear receptor coactivator 2                                                                       | NCOA2     |
| 213351_s_at | 489.6  | 270.8  | 934.5   | 9.5   | 25 | transmembrane and coiled-coil domain family 1                                                                                           | TMCC1     |
| 214447_at   | 467.1  | 178.1  | 514.6   | 7.8   | 25 | v-ets erythroblastosis virus E26 oncogene homolog 1 (avian)                                                                             | ETS1      |
| 214861_at   | 273.2  | 180.4  | 482.4   | 8.3   | 25 | jumonji domain containing 2C                                                                                                            | JMJD2C    |
| 215415_s_at | 378.9  | 114.3  | 474.7   | 7.7   | 25 | lysosomal trafficking regulator                                                                                                         | LYST      |
| 216172_at   | 429.1  | 230.1  | 708.1   | 23.5  | 25 | Exosome component 2                                                                                                                     | EXOSC2    |
| 219971_at   | 237.9  | 51.2   | 428     | 6.2   | 25 | interleukin 21 receptor                                                                                                                 | IL21R     |
| 210057_at   | 163.6  | 112.5  | 892.7   | 2.5   | 25 | PI-3-kinase-related kinase SMG-1                                                                                                        | SMG1      |
| 212949_at   | 375.3  | 184.4  | 766.8   | 20.7  | 25 | barren homolog (Drosophila)                                                                                                             | BRRN1     |
| 220674_at   | 323.7  | 255.8  | 689.3   | 6.1   | 25 | hypothetical protein FLJ22814                                                                                                           | FLJ22814  |
| 63825_at    | 491.4  | 340.1  | 1073.4  | 14.8  | 25 | ---                                                                                                                                     | ---       |
| 203334_at   | 444    | 238.8  | 946.9   | 17.3  | 25 | DEAH (Asp-Glu-Ala-His) box polypeptide 8                                                                                                | DHX8      |
| 209145_s_at | 251.4  | 105.7  | 544.1   | 9.8   | 25 | core-binding factor, runt domain, alpha subunit 2; translocated to, 2                                                                   | CBFA2T2   |
| 216898_s_at | 139.4  | 62.3   | 546.7   | 2.9   | 25 | collagen, type IV, alpha 3 (Goodpasture antigen)                                                                                        | COL4A3    |
| 219181_at   | 218.6  | 128.5  | 1224.7  | 4.1   | 25 | lipase, endothelial                                                                                                                     | LIPG      |
| 221606_s_at | 156.6  | 78.7   | 352     | 3.4   | 25 | nucleosomal binding protein 1                                                                                                           | NSBP1     |
| 205577_at   | 361.7  | 123.3  | 1258.9  | 10.9  | 25 | phosphorylase, glycogen; muscle (McArdle syndrome, glycogen storage disease type V)                                                     | PYGM      |
| 217505_at   | 84     | 10.4   | 833.9   | 0.6   | 25 | kelch-like 23 (Drosophila)                                                                                                              | KLHL23    |
| 208961_s_at | 5616   | 1346.2 | 20947.3 | 27.6  | 25 | Kruppel-like factor 6                                                                                                                   | KLF6      |
| 217787_s_at | 322.8  | 234.4  | 1316.5  | 6.6   | 25 | UDP-N-acetyl-alpha-D-galactosamine:polypeptide N-acetylgalactosaminyltransferase 2 (GalNAc-T2)                                          | GALNT2    |
| 207575_at   | 148    | 70.7   | 549.6   | 7     | 25 | golgi autoantigen, golgin subfamily a, 6                                                                                                | GOLGA6 /  |
| 206556_at   | 102.7  | 72.1   | 364.7   | 7.4   | 25 | clusterin-like 1 (retinal)                                                                                                              | CLUL1     |
| 211646_at   | 69.8   | 34.3   | 452.3   | 2.7   | 25 | Similar to KIAA1501 protein /// Similar to KIAA1501 protein                                                                             | LOC388248 |
| 213836_s_at | 140    | 94.2   | 467.8   | 8.7   | 25 | WD40 repeat protein Interacting with phospholinositides of 49kDa                                                                        | WIPI49    |
| 216498_at   | 96.5   | 66.5   | 393.4   | 4.2   | 25 | ---                                                                                                                                     | ---       |



|           |       |       |        |      |    |                                   |       |
|-----------|-------|-------|--------|------|----|-----------------------------------|-------|
| 219157_at | 991.2 | 639.9 | 6082.6 | 20.2 | 25 | kelch-like 2, Mayven (Drosophila) | KLHL2 |
| 214282_at | 60.3  | 31.1  | 462.2  | 0.3  | 25 | Hermansky-Pudlak syndrome 3       | HPS3  |
|           |       |       |        |      |    |                                   |       |
|           |       |       |        |      |    |                                   |       |

**Table S4. Standard marker combinations used in our laboratory to monitor MRD in childhood B-lineage ALL**

| <b>FITC</b> | <b>PE</b> | <b>PerCP</b> | <b>APC</b> |
|-------------|-----------|--------------|------------|
| CD58        | CD10      | CD34         | CD19       |
| CD38        | CD10      | CD34         | CD19       |
| CD45        | CD10      | CD34         | CD19       |
| anti-TdT    | CD10      | CD34         | CD19       |
| CD13        | CD10      | CD34         | CD19       |
| anti-TdT    | anti-IgM  | CD34         | CD19       |
| CD66c       | CD10      | CD34         | CD19       |
| CD33        | CD10      | CD34         | CD19       |
| CD15        | CD10      | CD34         | CD19       |

TdT, terminal deoxynucleotidyl transferase
